# Supplementary material for: Melanopsin Regulates Both Sleep-Promoting and Arousal-Promoting Responses to Light
Source: PLoS Biol. 2016 Jun 8;14(6):e1002482. doi: 10.1371/journal.pbio.1002482 (PMC4898879; doi:10.1371/journal.pbio.1002482)
Supplement: S2 Data — (XLSX) [file pbio.1002482.s002.xlsx]

## Sheet: Fig2B raw daOPN4KO 470nm pulse 
Test	Animal	Stage	Trial	Apparatus	Date	Duration	Segment of test	Time mobile	Time immobile
1	1	First stage	1	OPN4 4	13/11/2014	600	0 - 600 secs.	600	0
1	1	First stage	1	OPN4 4	13/11/2014	600	600 - 1200 secs.	600	0
1	1	First stage	1	OPN4 4	13/11/2014	600	1200 - 1800 secs.	600	0
1	1	First stage	1	OPN4 4	13/11/2014	600	1800 - 2400 secs.	600	0
1	1	First stage	1	OPN4 4	13/11/2014	600	2400 - 3000 secs.	600	0
1	1	First stage	1	OPN4 4	13/11/2014	600	3000 - 3600 secs.	600	0
1	1	First stage	1	OPN4 4	13/11/2014	600	3600 - 4200 secs.	600	0
1	1	First stage	1	OPN4 4	13/11/2014	600	4200 - 4800 secs.	600	0
1	1	First stage	1	OPN4 4	13/11/2014	600	4800 - 5400 secs.	516.1	83.9
1	1	First stage	1	OPN4 4	13/11/2014	600	5400 - 6000 secs.	600	0
1	1	First stage	1	OPN4 4	13/11/2014	600	6000 - 6600 secs.	475.9	124.1
1	1	First stage	1	OPN4 4	13/11/2014	600	6600 - 7200 secs.	600	0
1	1	First stage	1	OPN4 4	13/11/2014	600	7200 - 7800 secs.	501.5	98.5
1	1	First stage	1	OPN4 4	13/11/2014	600	7800 - 8400 secs.	600	0
1	1	First stage	1	OPN4 4	13/11/2014	600	8400 - 9000 secs.	600	0
1	1	First stage	1	OPN4 4	13/11/2014	600	9000 - 9600 secs.	499.1	100.9
1	1	First stage	1	OPN4 4	13/11/2014	600	9600 - 10200 secs	600	0
1	1	First stage	1	OPN4 4	13/11/2014	600	10200 - 10800 sec	600	0
1	1	First stage	1	OPN4 4	13/11/2014	600	10800 - 11400 sec	532.5	67.5
1	1	First stage	1	OPN4 4	13/11/2014	600	11400 - 12000 sec	600	0
1	1	First stage	1	OPN4 4	13/11/2014	600	12000 - 12600 sec	600	0
1	1	First stage	1	OPN4 4	13/11/2014	600	12600 - 13200 sec	600	0
1	1	First stage	1	OPN4 4	13/11/2014	600	13200 - 13800 sec	600	0
1	1	First stage	1	OPN4 4	13/11/2014	600	13800 - 14400 sec	490.3	109.7
1	1	First stage	1	OPN4 4	13/11/2014	600	14400 - 15000 sec	600	0
1	1	First stage	1	OPN4 4	13/11/2014	600	15000 - 15600 sec	600	0
1	1	First stage	1	OPN4 4	13/11/2014	600	15600 - 16200 sec	312.9	287.1
1	1	First stage	1	OPN4 4	13/11/2014	600	16200 - 16800 sec	527.7	72.3
1	1	First stage	1	OPN4 4	13/11/2014	600	16800 - 17400 sec	103.4	496.6
1	1	First stage	1	OPN4 4	13/11/2014	600	17400 - 18000 sec	26.1	573.9
1	1	First stage	1	OPN4 4	13/11/2014	600	18000 - 18600 sec	32.5	567.5
1	1	First stage	1	OPN4 4	13/11/2014	600	18600 - 19200 sec	58.4	541.6
1	1	First stage	1	OPN4 4	13/11/2014	600	19200 - 19800 sec	63.7	536.3
1	1	First stage	1	OPN4 4	13/11/2014	600	19800 - 20400 sec	267.6	332.5
1	1	First stage	1	OPN4 4	13/11/2014	600	20400 - 21000 sec	600	0
1	1	First stage	1	OPN4 4	13/11/2014	600	21000 - 21600 sec	419.8	180.3
1	1	First stage	1	OPN4 4	13/11/2014	600	21600 - 22200 sec	558	42
1	1	First stage	1	OPN4 4	13/11/2014	600	22200 - 22800 sec	553.9	46.1
1	1	First stage	1	OPN4 4	13/11/2014	600	22800 - 23400 sec	600	0
1	1	First stage	1	OPN4 4	13/11/2014	600	23400 - 24000 sec	600	0
1	1	First stage	1	OPN4 4	13/11/2014	600	24000 - 24600 sec	600	0
1	1	First stage	1	OPN4 4	13/11/2014	600	24600 - 25200 sec	600	0
1	1	First stage	1	OPN4 4	13/11/2014	600	25200 - 25800 sec	600	0
1	1	First stage	1	OPN4 4	13/11/2014	600	25800 - 26400 sec	600	0
1	1	First stage	1	OPN4 4	13/11/2014	600	26400 - 27000 sec	600	0
1	1	First stage	1	OPN4 4	13/11/2014	600	27000 - 27600 sec	600	0
1	1	First stage	1	OPN4 4	13/11/2014	600	27600 - 28200 sec	600	0
1	1	First stage	1	OPN4 4	13/11/2014	600	28200 - 28800 sec	600	0
1	1	First stage	1	OPN4 4	13/11/2014	600	28800 - 29400 sec	201.7	398.3
1	1	First stage	1	OPN4 4	13/11/2014	600	29400 - 30000 sec	183.9	416.1
1	1	First stage	1	OPN4 4	13/11/2014	600	30000 - 30600 sec	96.5	503.5
1	1	First stage	1	OPN4 4	13/11/2014	600	30600 - 31200 sec	43.3	556.7
1	1	First stage	1	OPN4 4	13/11/2014	600	31200 - 31800 sec	55.9	544.1
1	1	First stage	1	OPN4 4	13/11/2014	600	31800 - 32400 sec	120.6	479.4
1	1	First stage	1	OPN4 4	13/11/2014	600	32400 - 33000 sec	600	0
1	1	First stage	1	OPN4 4	13/11/2014	600	33000 - 33600 sec	600	0
1	1	First stage	1	OPN4 4	13/11/2014	600	33600 - 34200 sec	600	0
1	1	First stage	1	OPN4 4	13/11/2014	600	34200 - 34800 sec	600	0
1	1	First stage	1	OPN4 4	13/11/2014	600	34800 - 35400 sec	600	0
1	1	First stage	1	OPN4 4	13/11/2014	600	35400 - 36000 sec	600	0
1	1	First stage	1	OPN4 4	13/11/2014	600	36000 - 36600 sec	492.3	107.7
1	1	First stage	1	OPN4 4	13/11/2014	600	36600 - 37200 sec	131.9	468.1
1	1	First stage	1	OPN4 4	13/11/2014	600	37200 - 37800 sec	68.7	531.3
1	1	First stage	1	OPN4 4	13/11/2014	600	37800 - 38400 sec	21.2	578.8
1	1	First stage	1	OPN4 4	13/11/2014	600	38400 - 39000 sec	21.3	578.7
1	1	First stage	1	OPN4 4	13/11/2014	600	39000 - 39600 sec	30.3	569.7
1	1	First stage	1	OPN4 4	13/11/2014	600	39600 - 40200 sec	0	600
1	1	First stage	1	OPN4 4	13/11/2014	600	40200 - 40800 sec	1	599
1	1	First stage	1	OPN4 4	13/11/2014	600	40800 - 41400 sec	416.4	183.6
1	1	First stage	1	OPN4 4	13/11/2014	600	41400 - 42000 sec	551	49
1	1	First stage	1	OPN4 4	13/11/2014	600	42000 - 42600 sec	600	0
1	1	First stage	1	OPN4 4	13/11/2014	600	42600 - 43200 sec	600	0
1	1	First stage	1	OPN4 4	13/11/2014	600	43200 - 43800 sec	491.5	108.5
1	1	First stage	1	OPN4 4	13/11/2014	600	43800 - 44400 sec	431.1	168.9
1	1	First stage	1	OPN4 4	13/11/2014	600	44400 - 45000 sec	504	96
1	1	First stage	1	OPN4 4	13/11/2014	600	45000 - 45600 sec	127.5	472.6
1	1	First stage	1	OPN4 4	13/11/2014	600	45600 - 46200 sec	87.3	512.7
1	1	First stage	1	OPN4 4	13/11/2014	600	46200 - 46800 sec	25.5	574.5
1	1	First stage	1	OPN4 4	13/11/2014	600	46800 - 47400 sec	99.9	500.1
1	1	First stage	1	OPN4 4	13/11/2014	600	47400 - 48000 sec	0	600
1	1	First stage	1	OPN4 4	13/11/2014	600	48000 - 48600 sec	21.5	578.5
1	1	First stage	1	OPN4 4	13/11/2014	600	48600 - 49200 sec	3	597
1	1	First stage	1	OPN4 4	13/11/2014	600	49200 - 49800 sec	95.4	504.6
1	1	First stage	1	OPN4 4	13/11/2014	600	49800 - 50400 sec	108.1	491.9
1	1	First stage	1	OPN4 4	13/11/2014	600	50400 - 51000 sec	455.2	144.8
1	1	First stage	1	OPN4 4	13/11/2014	600	51000 - 51600 sec	5.1	594.9
1	1	First stage	1	OPN4 4	13/11/2014	600	51600 - 52200 sec	116.8	483.2
1	1	First stage	1	OPN4 4	13/11/2014	600	52200 - 52800 sec	25.2	574.8
1	1	First stage	1	OPN4 4	13/11/2014	600	52800 - 53400 sec	29.8	570.2
1	1	First stage	1	OPN4 4	13/11/2014	600	53400 - 54000 sec	40.2	559.8
1	1	First stage	1	OPN4 4	13/11/2014	600	54000 - 54600 sec	87.6	512.4
1	1	First stage	1	OPN4 4	13/11/2014	600	54600 - 55200 sec	39.2	560.8
1	1	First stage	1	OPN4 4	13/11/2014	600	55200 - 55800 sec	1	599
1	1	First stage	1	OPN4 4	13/11/2014	600	55800 - 56400 sec	7.1	592.9
1	1	First stage	1	OPN4 4	13/11/2014	600	56400 - 57000 sec	245.6	354.4
1	1	First stage	1	OPN4 4	13/11/2014	600	57000 - 57600 sec	600	0
1	1	First stage	1	OPN4 4	13/11/2014	600	57600 - 58200 sec	43.4	556.6
1	1	First stage	1	OPN4 4	13/11/2014	600	58200 - 58800 sec	1	599
1	1	First stage	1	OPN4 4	13/11/2014	600	58800 - 59400 sec	6	594
1	1	First stage	1	OPN4 4	13/11/2014	600	59400 - 60000 sec	6	594
1	1	First stage	1	OPN4 4	13/11/2014	600	60000 - 60600 sec	15.5	584.5
1	1	First stage	1	OPN4 4	13/11/2014	600	60600 - 61200 sec	82.9	517.1
1	1	First stage	1	OPN4 4	13/11/2014	600	61200 - 61800 sec	236.9	363.1
1	1	First stage	1	OPN4 4	13/11/2014	600	61800 - 62400 sec	198.2	401.8
1	1	First stage	1	OPN4 4	13/11/2014	600	62400 - 63000 sec	114.8	485.2
1	1	First stage	1	OPN4 4	13/11/2014	600	63000 - 63600 sec	15.1	584.9
1	1	First stage	1	OPN4 4	13/11/2014	600	63600 - 64200 sec	14.2	585.8
1	1	First stage	1	OPN4 4	13/11/2014	600	64200 - 64800 sec	5	595
1	1	First stage	1	OPN4 4	13/11/2014	600	64800 - 65400 sec	35.4	564.6
1	1	First stage	1	OPN4 4	13/11/2014	600	65400 - 66000 sec	33.6	566.4
1	1	First stage	1	OPN4 4	13/11/2014	600	66000 - 66600 sec	53.6	546.4
1	1	First stage	1	OPN4 4	13/11/2014	600	66600 - 67200 sec	43.3	556.7
1	1	First stage	1	OPN4 4	13/11/2014	600	67200 - 67800 sec	5.9	594.2
1	1	First stage	1	OPN4 4	13/11/2014	600	67800 - 68400 sec	38.2	561.8
1	1	First stage	1	OPN4 4	13/11/2014	600	68400 - 69000 sec	426.8	173.2
1	1	First stage	1	OPN4 4	13/11/2014	600	69000 - 69600 sec	487.7	112.3
1	1	First stage	1	OPN4 4	13/11/2014	600	69600 - 70200 sec	600	0
1	1	First stage	1	OPN4 4	13/11/2014	600	70200 - 70800 sec	540.8	59.2
1	1	First stage	1	OPN4 4	13/11/2014	600	70800 - 71400 sec	600	0
1	1	First stage	1	OPN4 4	13/11/2014	600	71400 - 72000 sec	117.2	482.8
1	1	First stage	1	OPN4 4	13/11/2014	600	72000 - 72600 sec	103.7	496.3
1	1	First stage	1	OPN4 4	13/11/2014	600	72600 - 73200 sec	39.6	560.4
1	1	First stage	1	OPN4 4	13/11/2014	600	73200 - 73800 sec	52.2	547.8
1	1	First stage	1	OPN4 4	13/11/2014	600	73800 - 74400 sec	148.6	451.4
1	1	First stage	1	OPN4 4	13/11/2014	600	74400 - 75000 sec	59.9	540.2
1	1	First stage	1	OPN4 4	13/11/2014	600	75000 - 75600 sec	2	598
1	1	First stage	1	OPN4 4	13/11/2014	600	75600 - 76200 sec	2	598
1	1	First stage	1	OPN4 4	13/11/2014	600	76200 - 76800 sec	5.3	594.7
1	1	First stage	1	OPN4 4	13/11/2014	600	76800 - 77400 sec	1	599
1	1	First stage	1	OPN4 4	13/11/2014	600	77400 - 78000 sec	7	593
1	1	First stage	1	OPN4 4	13/11/2014	600	78000 - 78600 sec	2	598
1	1	First stage	1	OPN4 4	13/11/2014	600	78600 - 79200 sec	522.6	77.4
1	1	First stage	1	OPN4 4	13/11/2014	600	79200 - 79800 sec	600	0
1	1	First stage	1	OPN4 4	13/11/2014	600	79800 - 80400 sec	600	0
1	1	First stage	1	OPN4 4	13/11/2014	600	80400 - 81000 sec	402.4	197.6
1	1	First stage	1	OPN4 4	13/11/2014	600	81000 - 81600 sec	63.3	536.7
1	1	First stage	1	OPN4 4	13/11/2014	600	81600 - 82200 sec	12.2	587.8
1	1	First stage	1	OPN4 4	13/11/2014	600	82200 - 82800 sec	117.5	482.5
1	1	First stage	1	OPN4 4	13/11/2014	600	82800 - 83400 sec	484.2	115.8
1	1	First stage	1	OPN4 4	13/11/2014	600	83400 - 84000 sec	47.9	552.1
1	1	First stage	1	OPN4 4	13/11/2014	600	84000 - 84600 sec	314.4	285.6
1	1	First stage	1	OPN4 4	13/11/2014	600	84600 - 85200 sec	434.1	165.9
1	1	First stage	1	OPN4 4	13/11/2014	600	85200 - 85800 sec	600	0
1	1	First stage	1	OPN4 4	13/11/2014	600	85800 - 86400 sec	391.9	208.1
1	1	First stage	1	OPN4 4	13/11/2014	600	86400 - 87000 sec	379.4	220.6
1	1	First stage	1	OPN4 4	13/11/2014	600	87000 - 87600 sec	573.3	26.7
1	1	First stage	1	OPN4 4	13/11/2014	600	87600 - 88200 sec	554.7	45.3
1	1	First stage	1	OPN4 4	13/11/2014	600	88200 - 88800 sec	600	0
1	1	First stage	1	OPN4 4	13/11/2014	600	88800 - 89400 sec	600	0
1	1	First stage	1	OPN4 4	13/11/2014	600	89400 - 90000 sec	559.8	40.2
1	1	First stage	1	OPN4 4	13/11/2014	600	90000 - 90600 sec	600	0
1	1	First stage	1	OPN4 4	13/11/2014	600	90600 - 91200 sec	548.9	51.1
1	1	First stage	1	OPN4 4	13/11/2014	600	91200 - 91800 sec	600	0
1	1	First stage	1	OPN4 4	13/11/2014	600	91800 - 92400 sec	600	0
1	1	First stage	1	OPN4 4	13/11/2014	600	92400 - 93000 sec	600	0
1	1	First stage	1	OPN4 4	13/11/2014	600	93000 - 93600 sec	497.6	102.4
1	1	First stage	1	OPN4 4	13/11/2014	600	93600 - 94200 sec	382.9	217.1
1	1	First stage	1	OPN4 4	13/11/2014	600	94200 - 94800 sec	252.1	347.9
1	1	First stage	1	OPN4 4	13/11/2014	600	94800 - 95400 sec	76.3	523.7
1	1	First stage	1	OPN4 4	13/11/2014	600	95400 - 96000 sec	277.3	322.7
1	1	First stage	1	OPN4 4	13/11/2014	600	96000 - 96600 sec	216.9	383.1
1	1	First stage	1	OPN4 4	13/11/2014	600	96600 - 97200 sec	287	313
1	1	First stage	1	OPN4 4	13/11/2014	600	97200 - 97800 sec	600	0
1	1	First stage	1	OPN4 4	13/11/2014	600	97800 - 98400 sec	600	0
1	1	First stage	1	OPN4 4	13/11/2014	600	98400 - 99000 sec	600	0
1	1	First stage	1	OPN4 4	13/11/2014	600	99000 - 99600 sec	572.2	27.8
1	1	First stage	1	OPN4 4	13/11/2014	600	99600 - 100200 se	557.3	42.7
1	1	First stage	1	OPN4 4	13/11/2014	600	100200 - 100800 s	600	0
1	1	First stage	1	OPN4 4	13/11/2014	600	100800 - 101400 s	600	0
1	1	First stage	1	OPN4 4	13/11/2014	600	101400 - 102000 s	600	0
1	1	First stage	1	OPN4 4	13/11/2014	600	102000 - 102600 s	600	0
1	1	First stage	1	OPN4 4	13/11/2014	600	102600 - 103200 s	336.3	263.7
1	1	First stage	1	OPN4 4	13/11/2014	600	103200 - 103800 s	600	0
1	1	First stage	1	OPN4 4	13/11/2014	600	103800 - 104400 s	545.6	54.4
1	1	First stage	1	OPN4 4	13/11/2014	600	104400 - 105000 s	433	167
1	1	First stage	1	OPN4 4	13/11/2014	600	105000 - 105600 s	600	0
1	1	First stage	1	OPN4 4	13/11/2014	600	105600 - 106200 s	600	0
1	1	First stage	1	OPN4 4	13/11/2014	600	106200 - 106800 s	600	0
1	1	First stage	1	OPN4 4	13/11/2014	600	106800 - 107400 s	579.4	20.6
1	1	First stage	1	OPN4 4	13/11/2014	600	107400 - 108000 s	538.1	61.9
1	1	First stage	1	OPN4 4	13/11/2014	600	108000 - 108600 s	349.9	250.1
1	1	First stage	1	OPN4 4	13/11/2014	600	108600 - 109200 s	520.2	79.8
1	1	First stage	1	OPN4 4	13/11/2014	600	109200 - 109800 s	600	0
1	1	First stage	1	OPN4 4	13/11/2014	600	109800 - 110400 s	600	0
1	1	First stage	1	OPN4 4	13/11/2014	600	110400 - 111000 s	600	0
1	1	First stage	1	OPN4 4	13/11/2014	600	111000 - 111600 s	600	0
1	1	First stage	1	OPN4 4	13/11/2014	600	111600 - 112200 s	600	0
1	1	First stage	1	OPN4 4	13/11/2014	600	112200 - 112800 s	600	0
1	1	First stage	1	OPN4 4	13/11/2014	600	112800 - 113400 s	600	0
1	1	First stage	1	OPN4 4	13/11/2014	600	113400 - 114000 s	488.1	111.9
1	1	First stage	1	OPN4 4	13/11/2014	600	114000 - 114600 s	547.5	52.6
1	1	First stage	1	OPN4 4	13/11/2014	600	114600 - 115200 s	222.1	377.9
1	1	First stage	1	OPN4 4	13/11/2014	600	115200 - 115800 s	130.3	469.7
1	1	First stage	1	OPN4 4	13/11/2014	600	115800 - 116400 s	82.1	517.9
1	1	First stage	1	OPN4 4	13/11/2014	600	116400 - 117000 s	7	593
1	1	First stage	1	OPN4 4	13/11/2014	600	117000 - 117600 s	33.5	566.5
1	1	First stage	1	OPN4 4	13/11/2014	600	117600 - 118200 s	31	569
1	1	First stage	1	OPN4 4	13/11/2014	600	118200 - 118800 s	15.6	584.4
1	1	First stage	1	OPN4 4	13/11/2014	600	118800 - 119400 s	242.1	357.9
1	1	First stage	1	OPN4 4	13/11/2014	600	119400 - 120000 s	600	0
1	1	First stage	1	OPN4 4	13/11/2014	600	120000 - 120600 s	600	0
1	1	First stage	1	OPN4 4	13/11/2014	600	120600 - 121200 s	600	0
1	1	First stage	1	OPN4 4	13/11/2014	600	121200 - 121800 s	600	0
1	1	First stage	1	OPN4 4	13/11/2014	600	121800 - 122400 s	550	50
1	1	First stage	1	OPN4 4	13/11/2014	600	122400 - 123000 s	183.5	416.5
1	1	First stage	1	OPN4 4	13/11/2014	600	123000 - 123600 s	160.6	439.5
1	1	First stage	1	OPN4 4	13/11/2014	600	123600 - 124200 s	15.5	584.5
1	1	First stage	1	OPN4 4	13/11/2014	600	124200 - 124800 s	17.2	582.8
1	1	First stage	1	OPN4 4	13/11/2014	600	124800 - 125400 s	16.2	583.8
1	1	First stage	1	OPN4 4	13/11/2014	600	125400 - 126000 s	29.2	570.8
1	1	First stage	1	OPN4 4	13/11/2014	600	126000 - 126600 s	0	600
1	1	First stage	1	OPN4 4	13/11/2014	600	126600 - 127200 s	38.9	561.1
1	1	First stage	1	OPN4 4	13/11/2014	600	127200 - 127800 s	39.2	560.8
1	1	First stage	1	OPN4 4	13/11/2014	600	127800 - 128400 s	485.9	114.1
1	1	First stage	1	OPN4 4	13/11/2014	600	128400 - 129000 s	600	0
1	1	First stage	1	OPN4 4	13/11/2014	600	129000 - 129600 s	600	0
1	1	First stage	1	OPN4 4	13/11/2014	600	129600 - 130200 s	600	0
1	1	First stage	1	OPN4 4	13/11/2014	600	130200 - 130800 s	423.5	176.5
1	1	First stage	1	OPN4 4	13/11/2014	600	130800 - 131400 s	556.2	43.8
1	1	First stage	1	OPN4 4	13/11/2014	600	131400 - 132000 s	600	0
1	1	First stage	1	OPN4 4	13/11/2014	600	132000 - 132600 s	600	0
1	1	First stage	1	OPN4 4	13/11/2014	600	132600 - 133200 s	218.8	381.2
1	1	First stage	1	OPN4 4	13/11/2014	600	133200 - 133800 s	28.7	571.3
1	1	First stage	1	OPN4 4	13/11/2014	600	133800 - 134400 s	42.4	557.6
1	1	First stage	1	OPN4 4	13/11/2014	600	134400 - 135000 s	47.4	552.6
1	1	First stage	1	OPN4 4	13/11/2014	600	135000 - 135600 s	2	598
1	1	First stage	1	OPN4 4	13/11/2014	600	135600 - 136200 s	59.4	540.6
1	1	First stage	1	OPN4 4	13/11/2014	600	136200 - 136800 s	5	595
1	1	First stage	1	OPN4 4	13/11/2014	600	136800 - 137400 s	16.2	583.8
1	1	First stage	1	OPN4 4	13/11/2014	600	137400 - 138000 s	22.2	577.8
1	1	First stage	1	OPN4 4	13/11/2014	600	138000 - 138600 s	104.6	495.4
1	1	First stage	1	OPN4 4	13/11/2014	600	138600 - 139200 s	45.9	554.1
1	1	First stage	1	OPN4 4	13/11/2014	600	139200 - 139800 s	235.6	364.4
1	1	First stage	1	OPN4 4	13/11/2014	600	139800 - 140400 s	561.3	38.7
1	1	First stage	1	OPN4 4	13/11/2014	600	140400 - 141000 s	548.4	51.6
1	1	First stage	1	OPN4 4	13/11/2014	600	141000 - 141600 s	485.6	114.5
1	1	First stage	1	OPN4 4	13/11/2014	600	141600 - 142200 s	89.1	510.9
1	1	First stage	1	OPN4 4	13/11/2014	600	142200 - 142800 s	80.9	519.1
1	1	First stage	1	OPN4 4	13/11/2014	600	142800 - 143400 s	45.6	554.4
1	1	First stage	1	OPN4 4	13/11/2014	600	143400 - 144000 s	116	484
1	1	First stage	1	OPN4 4	13/11/2014	600	144000 - 144600 s	76.9	523.1
1	1	First stage	1	OPN4 4	13/11/2014	600	144600 - 145200 s	76.2	523.8
1	1	First stage	1	OPN4 4	13/11/2014	600	145200 - 145800 s	35.5	564.5
1	1	First stage	1	OPN4 4	13/11/2014	600	145800 - 146400 s	36.9	563.1
1	1	First stage	1	OPN4 4	13/11/2014	600	146400 - 147000 s	38.7	561.3
1	1	First stage	1	OPN4 4	13/11/2014	600	147000 - 147600 s	7	593
1	1	First stage	1	OPN4 4	13/11/2014	600	147600 - 148200 s	28.6	571.4
1	1	First stage	1	OPN4 4	13/11/2014	600	148200 - 148800 s	20.2	579.8
1	1	First stage	1	OPN4 4	13/11/2014	600	148800 - 149400 s	401.6	198.4
1	1	First stage	1	OPN4 4	13/11/2014	600	149400 - 150000 s	375.1	224.9
1	1	First stage	1	OPN4 4	13/11/2014	600	150000 - 150600 s	62.9	537.1
1	1	First stage	1	OPN4 4	13/11/2014	600	150600 - 151200 s	24.1	575.9
1	1	First stage	1	OPN4 4	13/11/2014	600	151200 - 151800 s	2	598
1	1	First stage	1	OPN4 4	13/11/2014	600	151800 - 152400 s	9.1	590.9
1	1	First stage	1	OPN4 4	13/11/2014	600	152400 - 153000 s	228.8	371.2
1	1	First stage	1	OPN4 4	13/11/2014	600	153000 - 153600 s	327	273
1	1	First stage	1	OPN4 4	13/11/2014	600	153600 - 154200 s	16	584
1	1	First stage	1	OPN4 4	13/11/2014	600	154200 - 154800 s	95.2	504.8
1	1	First stage	1	OPN4 4	13/11/2014	600	154800 - 155400 s	52	548
1	1	First stage	1	OPN4 4	13/11/2014	600	155400 - 156000 s	97.2	502.8
1	1	First stage	1	OPN4 4	13/11/2014	600	156000 - 156600 s	88.2	511.8
1	1	First stage	1	OPN4 4	13/11/2014	600	156600 - 157200 s	39.3	560.7
1	1	First stage	1	OPN4 4	13/11/2014	600	157200 - 157800 s	28.8	571.2
1	1	First stage	1	OPN4 4	13/11/2014	600	157800 - 158400 s	37.5	562.5
1	1	First stage	1	OPN4 4	13/11/2014	600	158400 - 159000 s	46.4	553.6
1	1	First stage	1	OPN4 4	13/11/2014	600	159000 - 159600 s	298.2	301.8
1	1	First stage	1	OPN4 4	13/11/2014	600	159600 - 160200 s	281.1	318.9
1	1	First stage	1	OPN4 4	13/11/2014	600	160200 - 160800 s	6	594
1	1	First stage	1	OPN4 4	13/11/2014	600	160800 - 161400 s	1	599
1	1	First stage	1	OPN4 4	13/11/2014	600	161400 - 162000 s	12.3	587.7
1	1	First stage	1	OPN4 4	13/11/2014	600	162000 - 162600 s	90.7	509.3
1	1	First stage	1	OPN4 4	13/11/2014	600	162600 - 163200 s	99.9	500.1
1	1	First stage	1	OPN4 4	13/11/2014	600	163200 - 163800 s	163.1	437
1	1	First stage	1	OPN4 4	13/11/2014	600	163800 - 164400 s	541.2	58.8
1	1	First stage	1	OPN4 4	13/11/2014	600	164400 - 165000 s	600	0
1	1	First stage	1	OPN4 4	13/11/2014	600	165000 - 165600 s	600	0
1	1	First stage	1	OPN4 4	13/11/2014	600	165600 - 166200 s	600	0
1	1	First stage	1	OPN4 4	13/11/2014	600	166200 - 166800 s	551.9	48.1
1	1	First stage	1	OPN4 4	13/11/2014	600	166800 - 167400 s	433.9	166.1
1	1	First stage	1	OPN4 4	13/11/2014	600	167400 - 168000 s	419.8	180.2
1	1	First stage	1	OPN4 4	13/11/2014	600	168000 - 168600 s	374.5	225.5
1	1	First stage	1	OPN4 4	13/11/2014	600	168600 - 169200 s	428.5	171.5
1	1	First stage	1	OPN4 4	13/11/2014	600	169200 - 169800 s	0	600
1	1	First stage	1	OPN4 4	13/11/2014	600	169800 - 170400 s	0	600
1	1	First stage	1	OPN4 4	13/11/2014	600	170400 - 171000 s	7.1	592.9
1	1	First stage	1	OPN4 4	13/11/2014	600	171000 - 171600 s	8	592
1	1	First stage	1	OPN4 4	13/11/2014	600	171600 - 172200 s	34.8	565.2
1	1	First stage	1	OPN4 4	13/11/2014	600	172200 - 172800 s	369.5	230.5
1	1	First stage	1	OPN4 4	13/11/2014	600	172800 - 173400 s	555.9	44.1
1	1	First stage	1	OPN4 4	13/11/2014	600	173400 - 174000 s	349	251
1	1	First stage	1	OPN4 4	13/11/2014	600	174000 - 174600 s	276.5	323.5
1	1	First stage	1	OPN4 4	13/11/2014	600	174600 - 175200 s	457.8	142.3
1	1	First stage	1	OPN4 4	13/11/2014	600	175200 - 175800 s	547.7	52.3
1	1	First stage	1	OPN4 4	13/11/2014	600	175800 - 176400 s	448	152
1	1	First stage	1	OPN4 4	13/11/2014	600	176400 - 177000 s	542.8	57.2
1	1	First stage	1	OPN4 4	13/11/2014	600	177000 - 177600 s	521.8	78.2
1	1	First stage	1	OPN4 4	13/11/2014	600	177600 - 178200 s	540	60
1	1	First stage	1	OPN4 4	13/11/2014	600	178200 - 178800 s	600	0
1	1	First stage	1	OPN4 4	13/11/2014	600	178800 - 179400 s	298	302
1	1	First stage	1	OPN4 4	13/11/2014	600	179400 - 180000 s	528.3	71.7
1	1	First stage	1	OPN4 4	13/11/2014	600	180000 - 180600 s	536.6	63.4
1	1	First stage	1	OPN4 4	13/11/2014	600	180600 - 181200 s	600	0
1	1	First stage	1	OPN4 4	13/11/2014	600	181200 - 181800 s	600	0
1	1	First stage	1	OPN4 4	13/11/2014	600	181800 - 182400 s	600	0
1	1	First stage	1	OPN4 4	13/11/2014	600	182400 - 183000 s	448.2	151.8
1	1	First stage	1	OPN4 4	13/11/2014	600	183000 - 183600 s	501.7	98.3
1	1	First stage	1	OPN4 4	13/11/2014	600	183600 - 184200 s	600	0
1	1	First stage	1	OPN4 4	13/11/2014	600	184200 - 184800 s	600	0
1	1	First stage	1	OPN4 4	13/11/2014	600	184800 - 185400 s	446.2	153.9
1	1	First stage	1	OPN4 4	13/11/2014	600	185400 - 186000 s	568.4	31.6
1	1	First stage	1	OPN4 4	13/11/2014	600	186000 - 186600 s	360.6	239.4
1	1	First stage	1	OPN4 4	13/11/2014	600	186600 - 187200 s	600	0
1	1	First stage	1	OPN4 4	13/11/2014	600	187200 - 187800 s	393.3	206.7
1	1	First stage	1	OPN4 4	13/11/2014	600	187800 - 188400 s	279.3	320.8
1	1	First stage	1	OPN4 4	13/11/2014	600	188400 - 189000 s	31.6	568.4
1	1	First stage	1	OPN4 4	13/11/2014	600	189000 - 189600 s	78.6	521.5
1	1	First stage	1	OPN4 4	13/11/2014	600	189600 - 190200 s	453.8	146.2
1	1	First stage	1	OPN4 4	13/11/2014	600	190200 - 190800 s	253.8	346.2
1	1	First stage	1	OPN4 4	13/11/2014	600	190800 - 191400 s	474	126
1	1	First stage	1	OPN4 4	13/11/2014	600	191400 - 192000 s	464	136
1	1	First stage	1	OPN4 4	13/11/2014	600	192000 - 192600 s	443.2	156.8
1	1	First stage	1	OPN4 4	13/11/2014	600	192600 - 193200 s	600	0
1	1	First stage	1	OPN4 4	13/11/2014	600	193200 - 193800 s	593.4	6.6
1	1	First stage	1	OPN4 4	13/11/2014	600	193800 - 194400 s	490.7	109.3
1	1	First stage	1	OPN4 4	13/11/2014	600	194400 - 195000 s	419.4	180.6
1	1	First stage	1	OPN4 4	13/11/2014	600	195000 - 195600 s	236.9	363.1
1	1	First stage	1	OPN4 4	13/11/2014	600	195600 - 196200 s	600	0
1	1	First stage	1	OPN4 4	13/11/2014	600	196200 - 196800 s	450.2	149.8
1	1	First stage	1	OPN4 4	13/11/2014	600	196800 - 197400 s	350.2	249.8
1	1	First stage	1	OPN4 4	13/11/2014	600	197400 - 198000 s	565.9	34.1
1	1	First stage	1	OPN4 4	13/11/2014	600	198000 - 198600 s	404.4	195.6
1	1	First stage	1	OPN4 4	13/11/2014	600	198600 - 199200 s	314.5	285.5
1	1	First stage	1	OPN4 4	13/11/2014	600	199200 - 199800 s	600	0
1	1	First stage	1	OPN4 4	13/11/2014	600	199800 - 200400 s	339.6	260.4
1	1	First stage	1	OPN4 4	13/11/2014	600	200400 - 201000 s	363.5	236.5
1	1	First stage	1	OPN4 4	13/11/2014	600	201000 - 201600 s	555.9	44.2
1	1	First stage	1	OPN4 4	13/11/2014	600	201600 - 202200 s	600	0
1	1	First stage	1	OPN4 4	13/11/2014	600	202200 - 202800 s	600	0
1	1	First stage	1	OPN4 4	13/11/2014	600	202800 - 203400 s	542	58
1	1	First stage	1	OPN4 4	13/11/2014	600	203400 - 204000 s	436.5	163.5
1	1	First stage	1	OPN4 4	13/11/2014	600	204000 - 204600 s	117.4	482.6
1	1	First stage	1	OPN4 4	13/11/2014	600	204600 - 205200 s	118.9	481.2
1	1	First stage	1	OPN4 4	13/11/2014	600	205200 - 205800 s	7	593
1	1	First stage	1	OPN4 4	13/11/2014	600	205800 - 206400 s	59.8	540.2
1	1	First stage	1	OPN4 4	13/11/2014	600	206400 - 207000 s	80.6	519.4
1	1	First stage	1	OPN4 4	13/11/2014	600	207000 - 207600 s	5.1	594.9
1	1	First stage	1	OPN4 4	13/11/2014	600	207600 - 208200 s	15.2	584.9
1	1	First stage	1	OPN4 4	13/11/2014	600	208200 - 208800 s	200.7	399.3
1	1	First stage	1	OPN4 4	13/11/2014	600	208800 - 209400 s	415.2	184.8
1	1	First stage	1	OPN4 4	13/11/2014	600	209400 - 210000 s	68.8	531.2
1	1	First stage	1	OPN4 4	13/11/2014	600	210000 - 210600 s	34.5	565.5
1	1	First stage	1	OPN4 4	13/11/2014	600	210600 - 211200 s	80.2	519.8
1	1	First stage	1	OPN4 4	13/11/2014	600	211200 - 211800 s	20.2	579.8
1	1	First stage	1	OPN4 4	13/11/2014	600	211800 - 212400 s	1	599
1	1	First stage	1	OPN4 4	13/11/2014	600	212400 - 213000 s	116.4	483.6
1	1	First stage	1	OPN4 4	13/11/2014	600	213000 - 213600 s	600	0
1	1	First stage	1	OPN4 4	13/11/2014	600	213600 - 214200 s	600	0
1	1	First stage	1	OPN4 4	13/11/2014	600	214200 - 214800 s	428.2	171.9
1	1	First stage	1	OPN4 4	13/11/2014	600	214800 - 215400 s	485	115
1	1	First stage	1	OPN4 4	13/11/2014	600	215400 - 216000 s	600	0
2	2	First stage	1	OPN4 3	13/11/2014	600	0 - 600 secs.	23.9	576.1
2	2	First stage	1	OPN4 3	13/11/2014	600	600 - 1200 secs.	51.4	548.6
2	2	First stage	1	OPN4 3	13/11/2014	600	1200 - 1800 secs.	516	84
2	2	First stage	1	OPN4 3	13/11/2014	600	1800 - 2400 secs.	600	0
2	2	First stage	1	OPN4 3	13/11/2014	600	2400 - 3000 secs.	600	0
2	2	First stage	1	OPN4 3	13/11/2014	600	3000 - 3600 secs.	600	0
2	2	First stage	1	OPN4 3	13/11/2014	600	3600 - 4200 secs.	529.1	70.9
2	2	First stage	1	OPN4 3	13/11/2014	600	4200 - 4800 secs.	527.7	72.3
2	2	First stage	1	OPN4 3	13/11/2014	600	4800 - 5400 secs.	600	0
2	2	First stage	1	OPN4 3	13/11/2014	600	5400 - 6000 secs.	600	0
2	2	First stage	1	OPN4 3	13/11/2014	600	6000 - 6600 secs.	600	0
2	2	First stage	1	OPN4 3	13/11/2014	600	6600 - 7200 secs.	584.8	15.2
2	2	First stage	1	OPN4 3	13/11/2014	600	7200 - 7800 secs.	559.9	40.1
2	2	First stage	1	OPN4 3	13/11/2014	600	7800 - 8400 secs.	600	0
2	2	First stage	1	OPN4 3	13/11/2014	600	8400 - 9000 secs.	600	0
2	2	First stage	1	OPN4 3	13/11/2014	600	9000 - 9600 secs.	600	0
2	2	First stage	1	OPN4 3	13/11/2014	600	9600 - 10200 secs	540.7	59.3
2	2	First stage	1	OPN4 3	13/11/2014	600	10200 - 10800 sec	600	0
2	2	First stage	1	OPN4 3	13/11/2014	600	10800 - 11400 sec	600	0
2	2	First stage	1	OPN4 3	13/11/2014	600	11400 - 12000 sec	584.6	15.4
2	2	First stage	1	OPN4 3	13/11/2014	600	12000 - 12600 sec	282	318
2	2	First stage	1	OPN4 3	13/11/2014	600	12600 - 13200 sec	600	0
2	2	First stage	1	OPN4 3	13/11/2014	600	13200 - 13800 sec	600	0
2	2	First stage	1	OPN4 3	13/11/2014	600	13800 - 14400 sec	600	0
2	2	First stage	1	OPN4 3	13/11/2014	600	14400 - 15000 sec	600	0
2	2	First stage	1	OPN4 3	13/11/2014	600	15000 - 15600 sec	600	0
2	2	First stage	1	OPN4 3	13/11/2014	600	15600 - 16200 sec	600	0
2	2	First stage	1	OPN4 3	13/11/2014	600	16200 - 16800 sec	600	0
2	2	First stage	1	OPN4 3	13/11/2014	600	16800 - 17400 sec	600	0
2	2	First stage	1	OPN4 3	13/11/2014	600	17400 - 18000 sec	600	0
2	2	First stage	1	OPN4 3	13/11/2014	600	18000 - 18600 sec	600	0
2	2	First stage	1	OPN4 3	13/11/2014	600	18600 - 19200 sec	600	0
2	2	First stage	1	OPN4 3	13/11/2014	600	19200 - 19800 sec	600	0
2	2	First stage	1	OPN4 3	13/11/2014	600	19800 - 20400 sec	90.7	509.4
2	2	First stage	1	OPN4 3	13/11/2014	600	20400 - 21000 sec	84.6	515.5
2	2	First stage	1	OPN4 3	13/11/2014	600	21000 - 21600 sec	330.9	269.1
2	2	First stage	1	OPN4 3	13/11/2014	600	21600 - 22200 sec	115.7	484.3
2	2	First stage	1	OPN4 3	13/11/2014	600	22200 - 22800 sec	600	0
2	2	First stage	1	OPN4 3	13/11/2014	600	22800 - 23400 sec	600	0
2	2	First stage	1	OPN4 3	13/11/2014	600	23400 - 24000 sec	600	0
2	2	First stage	1	OPN4 3	13/11/2014	600	24000 - 24600 sec	600	0
2	2	First stage	1	OPN4 3	13/11/2014	600	24600 - 25200 sec	600	0
2	2	First stage	1	OPN4 3	13/11/2014	600	25200 - 25800 sec	600	0
2	2	First stage	1	OPN4 3	13/11/2014	600	25800 - 26400 sec	600	0
2	2	First stage	1	OPN4 3	13/11/2014	600	26400 - 27000 sec	600	0
2	2	First stage	1	OPN4 3	13/11/2014	600	27000 - 27600 sec	600	0
2	2	First stage	1	OPN4 3	13/11/2014	600	27600 - 28200 sec	600	0
2	2	First stage	1	OPN4 3	13/11/2014	600	28200 - 28800 sec	600	0
2	2	First stage	1	OPN4 3	13/11/2014	600	28800 - 29400 sec	600	0
2	2	First stage	1	OPN4 3	13/11/2014	600	29400 - 30000 sec	471.4	128.6
2	2	First stage	1	OPN4 3	13/11/2014	600	30000 - 30600 sec	600	0
2	2	First stage	1	OPN4 3	13/11/2014	600	30600 - 31200 sec	600	0
2	2	First stage	1	OPN4 3	13/11/2014	600	31200 - 31800 sec	600	0
2	2	First stage	1	OPN4 3	13/11/2014	600	31800 - 32400 sec	600	0
2	2	First stage	1	OPN4 3	13/11/2014	600	32400 - 33000 sec	91.1	508.9
2	2	First stage	1	OPN4 3	13/11/2014	600	33000 - 33600 sec	50.2	549.8
2	2	First stage	1	OPN4 3	13/11/2014	600	33600 - 34200 sec	66.4	533.6
2	2	First stage	1	OPN4 3	13/11/2014	600	34200 - 34800 sec	213	387
2	2	First stage	1	OPN4 3	13/11/2014	600	34800 - 35400 sec	160	440.1
2	2	First stage	1	OPN4 3	13/11/2014	600	35400 - 36000 sec	192.5	407.5
2	2	First stage	1	OPN4 3	13/11/2014	600	36000 - 36600 sec	600	0
2	2	First stage	1	OPN4 3	13/11/2014	600	36600 - 37200 sec	600	0
2	2	First stage	1	OPN4 3	13/11/2014	600	37200 - 37800 sec	600	0
2	2	First stage	1	OPN4 3	13/11/2014	600	37800 - 38400 sec	600	0
2	2	First stage	1	OPN4 3	13/11/2014	600	38400 - 39000 sec	600	0
2	2	First stage	1	OPN4 3	13/11/2014	600	39000 - 39600 sec	600	0
2	2	First stage	1	OPN4 3	13/11/2014	600	39600 - 40200 sec	600	0
2	2	First stage	1	OPN4 3	13/11/2014	600	40200 - 40800 sec	600	0
2	2	First stage	1	OPN4 3	13/11/2014	600	40800 - 41400 sec	452.4	147.6
2	2	First stage	1	OPN4 3	13/11/2014	600	41400 - 42000 sec	87.7	512.3
2	2	First stage	1	OPN4 3	13/11/2014	600	42000 - 42600 sec	97	503
2	2	First stage	1	OPN4 3	13/11/2014	600	42600 - 43200 sec	190.5	409.5
2	2	First stage	1	OPN4 3	13/11/2014	600	43200 - 43800 sec	555.3	44.7
2	2	First stage	1	OPN4 3	13/11/2014	600	43800 - 44400 sec	600	0
2	2	First stage	1	OPN4 3	13/11/2014	600	44400 - 45000 sec	289.5	310.5
2	2	First stage	1	OPN4 3	13/11/2014	600	45000 - 45600 sec	54	546
2	2	First stage	1	OPN4 3	13/11/2014	600	45600 - 46200 sec	16.1	583.9
2	2	First stage	1	OPN4 3	13/11/2014	600	46200 - 46800 sec	1	599
2	2	First stage	1	OPN4 3	13/11/2014	600	46800 - 47400 sec	1	599
2	2	First stage	1	OPN4 3	13/11/2014	600	47400 - 48000 sec	383.6	216.4
2	2	First stage	1	OPN4 3	13/11/2014	600	48000 - 48600 sec	600	0
2	2	First stage	1	OPN4 3	13/11/2014	600	48600 - 49200 sec	473.3	126.7
2	2	First stage	1	OPN4 3	13/11/2014	600	49200 - 49800 sec	136.6	463.5
2	2	First stage	1	OPN4 3	13/11/2014	600	49800 - 50400 sec	1	599
2	2	First stage	1	OPN4 3	13/11/2014	600	50400 - 51000 sec	40.5	559.5
2	2	First stage	1	OPN4 3	13/11/2014	600	51000 - 51600 sec	89.1	510.9
2	2	First stage	1	OPN4 3	13/11/2014	600	51600 - 52200 sec	41.2	558.8
2	2	First stage	1	OPN4 3	13/11/2014	600	52200 - 52800 sec	15.1	584.9
2	2	First stage	1	OPN4 3	13/11/2014	600	52800 - 53400 sec	90.8	509.2
2	2	First stage	1	OPN4 3	13/11/2014	600	53400 - 54000 sec	192.8	407.2
2	2	First stage	1	OPN4 3	13/11/2014	600	54000 - 54600 sec	13.1	586.9
2	2	First stage	1	OPN4 3	13/11/2014	600	54600 - 55200 sec	375	225
2	2	First stage	1	OPN4 3	13/11/2014	600	55200 - 55800 sec	474.5	125.5
2	2	First stage	1	OPN4 3	13/11/2014	600	55800 - 56400 sec	470.4	129.7
2	2	First stage	1	OPN4 3	13/11/2014	600	56400 - 57000 sec	5.4	594.6
2	2	First stage	1	OPN4 3	13/11/2014	600	57000 - 57600 sec	25.2	574.8
2	2	First stage	1	OPN4 3	13/11/2014	600	57600 - 58200 sec	59.7	540.3
2	2	First stage	1	OPN4 3	13/11/2014	600	58200 - 58800 sec	105.8	494.2
2	2	First stage	1	OPN4 3	13/11/2014	600	58800 - 59400 sec	99.5	500.5
2	2	First stage	1	OPN4 3	13/11/2014	600	59400 - 60000 sec	54.3	545.7
2	2	First stage	1	OPN4 3	13/11/2014	600	60000 - 60600 sec	34	566
2	2	First stage	1	OPN4 3	13/11/2014	600	60600 - 61200 sec	62.8	537.3
2	2	First stage	1	OPN4 3	13/11/2014	600	61200 - 61800 sec	60.2	539.8
2	2	First stage	1	OPN4 3	13/11/2014	600	61800 - 62400 sec	103	497
2	2	First stage	1	OPN4 3	13/11/2014	600	62400 - 63000 sec	46.8	553.2
2	2	First stage	1	OPN4 3	13/11/2014	600	63000 - 63600 sec	209	391
2	2	First stage	1	OPN4 3	13/11/2014	600	63600 - 64200 sec	497	103
2	2	First stage	1	OPN4 3	13/11/2014	600	64200 - 64800 sec	600	0
2	2	First stage	1	OPN4 3	13/11/2014	600	64800 - 65400 sec	600	0
2	2	First stage	1	OPN4 3	13/11/2014	600	65400 - 66000 sec	446.4	153.6
2	2	First stage	1	OPN4 3	13/11/2014	600	66000 - 66600 sec	78.8	521.2
2	2	First stage	1	OPN4 3	13/11/2014	600	66600 - 67200 sec	10.1	589.9
2	2	First stage	1	OPN4 3	13/11/2014	600	67200 - 67800 sec	2	598
2	2	First stage	1	OPN4 3	13/11/2014	600	67800 - 68400 sec	55.2	544.8
2	2	First stage	1	OPN4 3	13/11/2014	600	68400 - 69000 sec	0	600
2	2	First stage	1	OPN4 3	13/11/2014	600	69000 - 69600 sec	98.8	501.2
2	2	First stage	1	OPN4 3	13/11/2014	600	69600 - 70200 sec	19.2	580.8
2	2	First stage	1	OPN4 3	13/11/2014	600	70200 - 70800 sec	70.2	529.9
2	2	First stage	1	OPN4 3	13/11/2014	600	70800 - 71400 sec	89.8	510.2
2	2	First stage	1	OPN4 3	13/11/2014	600	71400 - 72000 sec	405.3	194.7
2	2	First stage	1	OPN4 3	13/11/2014	600	72000 - 72600 sec	560.5	39.5
2	2	First stage	1	OPN4 3	13/11/2014	600	72600 - 73200 sec	169	431
2	2	First stage	1	OPN4 3	13/11/2014	600	73200 - 73800 sec	135.9	464.1
2	2	First stage	1	OPN4 3	13/11/2014	600	73800 - 74400 sec	141.4	458.6
2	2	First stage	1	OPN4 3	13/11/2014	600	74400 - 75000 sec	157.3	442.7
2	2	First stage	1	OPN4 3	13/11/2014	600	75000 - 75600 sec	105.9	494.1
2	2	First stage	1	OPN4 3	13/11/2014	600	75600 - 76200 sec	80.6	519.4
2	2	First stage	1	OPN4 3	13/11/2014	600	76200 - 76800 sec	21.5	578.5
2	2	First stage	1	OPN4 3	13/11/2014	600	76800 - 77400 sec	82.4	517.6
2	2	First stage	1	OPN4 3	13/11/2014	600	77400 - 78000 sec	16.2	583.8
2	2	First stage	1	OPN4 3	13/11/2014	600	78000 - 78600 sec	56.4	543.6
2	2	First stage	1	OPN4 3	13/11/2014	600	78600 - 79200 sec	80.5	519.5
2	2	First stage	1	OPN4 3	13/11/2014	600	79200 - 79800 sec	272	328
2	2	First stage	1	OPN4 3	13/11/2014	600	79800 - 80400 sec	600	0
2	2	First stage	1	OPN4 3	13/11/2014	600	80400 - 81000 sec	562.8	37.2
2	2	First stage	1	OPN4 3	13/11/2014	600	81000 - 81600 sec	47.4	552.6
2	2	First stage	1	OPN4 3	13/11/2014	600	81600 - 82200 sec	108.4	491.6
2	2	First stage	1	OPN4 3	13/11/2014	600	82200 - 82800 sec	42.9	557.1
2	2	First stage	1	OPN4 3	13/11/2014	600	82800 - 83400 sec	201.5	398.5
2	2	First stage	1	OPN4 3	13/11/2014	600	83400 - 84000 sec	544.2	55.8
2	2	First stage	1	OPN4 3	13/11/2014	600	84000 - 84600 sec	458	142.1
2	2	First stage	1	OPN4 3	13/11/2014	600	84600 - 85200 sec	0	600
2	2	First stage	1	OPN4 3	13/11/2014	600	85200 - 85800 sec	17.2	582.8
2	2	First stage	1	OPN4 3	13/11/2014	600	85800 - 86400 sec	102.2	497.8
2	2	First stage	1	OPN4 3	13/11/2014	600	86400 - 87000 sec	339	261
2	2	First stage	1	OPN4 3	13/11/2014	600	87000 - 87600 sec	600	0
2	2	First stage	1	OPN4 3	13/11/2014	600	87600 - 88200 sec	600	0
2	2	First stage	1	OPN4 3	13/11/2014	600	88200 - 88800 sec	600	0
2	2	First stage	1	OPN4 3	13/11/2014	600	88800 - 89400 sec	600	0
2	2	First stage	1	OPN4 3	13/11/2014	600	89400 - 90000 sec	600	0
2	2	First stage	1	OPN4 3	13/11/2014	600	90000 - 90600 sec	600	0
2	2	First stage	1	OPN4 3	13/11/2014	600	90600 - 91200 sec	600	0
2	2	First stage	1	OPN4 3	13/11/2014	600	91200 - 91800 sec	600	0
2	2	First stage	1	OPN4 3	13/11/2014	600	91800 - 92400 sec	600	0
2	2	First stage	1	OPN4 3	13/11/2014	600	92400 - 93000 sec	600	0
2	2	First stage	1	OPN4 3	13/11/2014	600	93000 - 93600 sec	600	0
2	2	First stage	1	OPN4 3	13/11/2014	600	93600 - 94200 sec	385.8	214.2
2	2	First stage	1	OPN4 3	13/11/2014	600	94200 - 94800 sec	103.1	496.9
2	2	First stage	1	OPN4 3	13/11/2014	600	94800 - 95400 sec	93.8	506.2
2	2	First stage	1	OPN4 3	13/11/2014	600	95400 - 96000 sec	495.2	104.8
2	2	First stage	1	OPN4 3	13/11/2014	600	96000 - 96600 sec	526.1	73.9
2	2	First stage	1	OPN4 3	13/11/2014	600	96600 - 97200 sec	162.3	437.7
2	2	First stage	1	OPN4 3	13/11/2014	600	97200 - 97800 sec	204.2	395.8
2	2	First stage	1	OPN4 3	13/11/2014	600	97800 - 98400 sec	359.1	240.9
2	2	First stage	1	OPN4 3	13/11/2014	600	98400 - 99000 sec	600	0
2	2	First stage	1	OPN4 3	13/11/2014	600	99000 - 99600 sec	600	0
2	2	First stage	1	OPN4 3	13/11/2014	600	99600 - 100200 se	600	0
2	2	First stage	1	OPN4 3	13/11/2014	600	100200 - 100800 s	600	0
2	2	First stage	1	OPN4 3	13/11/2014	600	100800 - 101400 s	600	0
2	2	First stage	1	OPN4 3	13/11/2014	600	101400 - 102000 s	600	0
2	2	First stage	1	OPN4 3	13/11/2014	600	102000 - 102600 s	600	0
2	2	First stage	1	OPN4 3	13/11/2014	600	102600 - 103200 s	600	0
2	2	First stage	1	OPN4 3	13/11/2014	600	103200 - 103800 s	600	0
2	2	First stage	1	OPN4 3	13/11/2014	600	103800 - 104400 s	600	0
2	2	First stage	1	OPN4 3	13/11/2014	600	104400 - 105000 s	600	0
2	2	First stage	1	OPN4 3	13/11/2014	600	105000 - 105600 s	600	0
2	2	First stage	1	OPN4 3	13/11/2014	600	105600 - 106200 s	600	0
2	2	First stage	1	OPN4 3	13/11/2014	600	106200 - 106800 s	600	0
2	2	First stage	1	OPN4 3	13/11/2014	600	106800 - 107400 s	600	0
2	2	First stage	1	OPN4 3	13/11/2014	600	107400 - 108000 s	600	0
2	2	First stage	1	OPN4 3	13/11/2014	600	108000 - 108600 s	600	0
2	2	First stage	1	OPN4 3	13/11/2014	600	108600 - 109200 s	600	0
2	2	First stage	1	OPN4 3	13/11/2014	600	109200 - 109800 s	600	0
2	2	First stage	1	OPN4 3	13/11/2014	600	109800 - 110400 s	371.6	228.4
2	2	First stage	1	OPN4 3	13/11/2014	600	110400 - 111000 s	90.5	509.5
2	2	First stage	1	OPN4 3	13/11/2014	600	111000 - 111600 s	369.8	230.2
2	2	First stage	1	OPN4 3	13/11/2014	600	111600 - 112200 s	600	0
2	2	First stage	1	OPN4 3	13/11/2014	600	112200 - 112800 s	454.8	145.2
2	2	First stage	1	OPN4 3	13/11/2014	600	112800 - 113400 s	47.7	552.3
2	2	First stage	1	OPN4 3	13/11/2014	600	113400 - 114000 s	128.1	472
2	2	First stage	1	OPN4 3	13/11/2014	600	114000 - 114600 s	371.4	228.6
2	2	First stage	1	OPN4 3	13/11/2014	600	114600 - 115200 s	196.8	403.2
2	2	First stage	1	OPN4 3	13/11/2014	600	115200 - 115800 s	82	518
2	2	First stage	1	OPN4 3	13/11/2014	600	115800 - 116400 s	176.8	423.2
2	2	First stage	1	OPN4 3	13/11/2014	600	116400 - 117000 s	307.3	292.7
2	2	First stage	1	OPN4 3	13/11/2014	600	117000 - 117600 s	364.2	235.8
2	2	First stage	1	OPN4 3	13/11/2014	600	117600 - 118200 s	600	0
2	2	First stage	1	OPN4 3	13/11/2014	600	118200 - 118800 s	600	0
2	2	First stage	1	OPN4 3	13/11/2014	600	118800 - 119400 s	600	0
2	2	First stage	1	OPN4 3	13/11/2014	600	119400 - 120000 s	556.4	43.6
2	2	First stage	1	OPN4 3	13/11/2014	600	120000 - 120600 s	600	0
2	2	First stage	1	OPN4 3	13/11/2014	600	120600 - 121200 s	600	0
2	2	First stage	1	OPN4 3	13/11/2014	600	121200 - 121800 s	600	0
2	2	First stage	1	OPN4 3	13/11/2014	600	121800 - 122400 s	600	0
2	2	First stage	1	OPN4 3	13/11/2014	600	122400 - 123000 s	600	0
2	2	First stage	1	OPN4 3	13/11/2014	600	123000 - 123600 s	408	192
2	2	First stage	1	OPN4 3	13/11/2014	600	123600 - 124200 s	43	557.1
2	2	First stage	1	OPN4 3	13/11/2014	600	124200 - 124800 s	76.2	523.8
2	2	First stage	1	OPN4 3	13/11/2014	600	124800 - 125400 s	243	357
2	2	First stage	1	OPN4 3	13/11/2014	600	125400 - 126000 s	521.8	78.3
2	2	First stage	1	OPN4 3	13/11/2014	600	126000 - 126600 s	85.9	514.1
2	2	First stage	1	OPN4 3	13/11/2014	600	126600 - 127200 s	8.1	591.9
2	2	First stage	1	OPN4 3	13/11/2014	600	127200 - 127800 s	46	554
2	2	First stage	1	OPN4 3	13/11/2014	600	127800 - 128400 s	397.1	202.9
2	2	First stage	1	OPN4 3	13/11/2014	600	128400 - 129000 s	600	0
2	2	First stage	1	OPN4 3	13/11/2014	600	129000 - 129600 s	600	0
2	2	First stage	1	OPN4 3	13/11/2014	600	129600 - 130200 s	600	0
2	2	First stage	1	OPN4 3	13/11/2014	600	130200 - 130800 s	600	0
2	2	First stage	1	OPN4 3	13/11/2014	600	130800 - 131400 s	600	0
2	2	First stage	1	OPN4 3	13/11/2014	600	131400 - 132000 s	559.5	40.5
2	2	First stage	1	OPN4 3	13/11/2014	600	132000 - 132600 s	600	0
2	2	First stage	1	OPN4 3	13/11/2014	600	132600 - 133200 s	557.7	42.3
2	2	First stage	1	OPN4 3	13/11/2014	600	133200 - 133800 s	226.7	373.3
2	2	First stage	1	OPN4 3	13/11/2014	600	133800 - 134400 s	32.2	567.8
2	2	First stage	1	OPN4 3	13/11/2014	600	134400 - 135000 s	76.7	523.3
2	2	First stage	1	OPN4 3	13/11/2014	600	135000 - 135600 s	59.4	540.6
2	2	First stage	1	OPN4 3	13/11/2014	600	135600 - 136200 s	290.5	309.5
2	2	First stage	1	OPN4 3	13/11/2014	600	136200 - 136800 s	12.5	587.5
2	2	First stage	1	OPN4 3	13/11/2014	600	136800 - 137400 s	64.5	535.5
2	2	First stage	1	OPN4 3	13/11/2014	600	137400 - 138000 s	37	563
2	2	First stage	1	OPN4 3	13/11/2014	600	138000 - 138600 s	81.5	518.5
2	2	First stage	1	OPN4 3	13/11/2014	600	138600 - 139200 s	8	592
2	2	First stage	1	OPN4 3	13/11/2014	600	139200 - 139800 s	10.2	589.8
2	2	First stage	1	OPN4 3	13/11/2014	600	139800 - 140400 s	41.8	558.3
2	2	First stage	1	OPN4 3	13/11/2014	600	140400 - 141000 s	179.1	420.9
2	2	First stage	1	OPN4 3	13/11/2014	600	141000 - 141600 s	269.2	330.8
2	2	First stage	1	OPN4 3	13/11/2014	600	141600 - 142200 s	90.4	509.6
2	2	First stage	1	OPN4 3	13/11/2014	600	142200 - 142800 s	3	597
2	2	First stage	1	OPN4 3	13/11/2014	600	142800 - 143400 s	35.4	564.6
2	2	First stage	1	OPN4 3	13/11/2014	600	143400 - 144000 s	115.4	484.6
2	2	First stage	1	OPN4 3	13/11/2014	600	144000 - 144600 s	505.2	94.8
2	2	First stage	1	OPN4 3	13/11/2014	600	144600 - 145200 s	600	0
2	2	First stage	1	OPN4 3	13/11/2014	600	145200 - 145800 s	600	0
2	2	First stage	1	OPN4 3	13/11/2014	600	145800 - 146400 s	600	0
2	2	First stage	1	OPN4 3	13/11/2014	600	146400 - 147000 s	555.7	44.3
2	2	First stage	1	OPN4 3	13/11/2014	600	147000 - 147600 s	598.6	1.4
2	2	First stage	1	OPN4 3	13/11/2014	600	147600 - 148200 s	219.5	380.5
2	2	First stage	1	OPN4 3	13/11/2014	600	148200 - 148800 s	74.8	525.2
2	2	First stage	1	OPN4 3	13/11/2014	600	148800 - 149400 s	164.6	435.4
2	2	First stage	1	OPN4 3	13/11/2014	600	149400 - 150000 s	66.9	533.1
2	2	First stage	1	OPN4 3	13/11/2014	600	150000 - 150600 s	44.9	555.2
2	2	First stage	1	OPN4 3	13/11/2014	600	150600 - 151200 s	67.2	532.8
2	2	First stage	1	OPN4 3	13/11/2014	600	151200 - 151800 s	31.6	568.4
2	2	First stage	1	OPN4 3	13/11/2014	600	151800 - 152400 s	75	525
2	2	First stage	1	OPN4 3	13/11/2014	600	152400 - 153000 s	68.2	531.8
2	2	First stage	1	OPN4 3	13/11/2014	600	153000 - 153600 s	9	591
2	2	First stage	1	OPN4 3	13/11/2014	600	153600 - 154200 s	24.6	575.4
2	2	First stage	1	OPN4 3	13/11/2014	600	154200 - 154800 s	33.3	566.7
2	2	First stage	1	OPN4 3	13/11/2014	600	154800 - 155400 s	29.3	570.7
2	2	First stage	1	OPN4 3	13/11/2014	600	155400 - 156000 s	43.7	556.3
2	2	First stage	1	OPN4 3	13/11/2014	600	156000 - 156600 s	37.7	562.3
2	2	First stage	1	OPN4 3	13/11/2014	600	156600 - 157200 s	212.2	387.8
2	2	First stage	1	OPN4 3	13/11/2014	600	157200 - 157800 s	507.2	92.8
2	2	First stage	1	OPN4 3	13/11/2014	600	157800 - 158400 s	600	0
2	2	First stage	1	OPN4 3	13/11/2014	600	158400 - 159000 s	329.8	270.2
2	2	First stage	1	OPN4 3	13/11/2014	600	159000 - 159600 s	131.1	468.9
2	2	First stage	1	OPN4 3	13/11/2014	600	159600 - 160200 s	45.6	554.4
2	2	First stage	1	OPN4 3	13/11/2014	600	160200 - 160800 s	73.9	526.1
2	2	First stage	1	OPN4 3	13/11/2014	600	160800 - 161400 s	128.7	471.3
2	2	First stage	1	OPN4 3	13/11/2014	600	161400 - 162000 s	110.6	489.5
2	2	First stage	1	OPN4 3	13/11/2014	600	162000 - 162600 s	94.8	505.2
2	2	First stage	1	OPN4 3	13/11/2014	600	162600 - 163200 s	101	499
2	2	First stage	1	OPN4 3	13/11/2014	600	163200 - 163800 s	63.9	536.1
2	2	First stage	1	OPN4 3	13/11/2014	600	163800 - 164400 s	89.5	510.5
2	2	First stage	1	OPN4 3	13/11/2014	600	164400 - 165000 s	3.2	596.8
2	2	First stage	1	OPN4 3	13/11/2014	600	165000 - 165600 s	560.4	39.6
2	2	First stage	1	OPN4 3	13/11/2014	600	165600 - 166200 s	600	0
2	2	First stage	1	OPN4 3	13/11/2014	600	166200 - 166800 s	173.3	426.7
2	2	First stage	1	OPN4 3	13/11/2014	600	166800 - 167400 s	98.9	501.1
2	2	First stage	1	OPN4 3	13/11/2014	600	167400 - 168000 s	64.7	535.3
2	2	First stage	1	OPN4 3	13/11/2014	600	168000 - 168600 s	239.9	360.2
2	2	First stage	1	OPN4 3	13/11/2014	600	168600 - 169200 s	600	0
2	2	First stage	1	OPN4 3	13/11/2014	600	169200 - 169800 s	496.9	103.1
2	2	First stage	1	OPN4 3	13/11/2014	600	169800 - 170400 s	46.2	553.8
2	2	First stage	1	OPN4 3	13/11/2014	600	170400 - 171000 s	78.5	521.5
2	2	First stage	1	OPN4 3	13/11/2014	600	171000 - 171600 s	61.2	538.8
2	2	First stage	1	OPN4 3	13/11/2014	600	171600 - 172200 s	92.7	507.3
2	2	First stage	1	OPN4 3	13/11/2014	600	172200 - 172800 s	50.7	549.3
2	2	First stage	1	OPN4 3	13/11/2014	600	172800 - 173400 s	546	54
2	2	First stage	1	OPN4 3	13/11/2014	600	173400 - 174000 s	376.7	223.3
2	2	First stage	1	OPN4 3	13/11/2014	600	174000 - 174600 s	401	199
2	2	First stage	1	OPN4 3	13/11/2014	600	174600 - 175200 s	41.2	558.8
2	2	First stage	1	OPN4 3	13/11/2014	600	175200 - 175800 s	0	600
2	2	First stage	1	OPN4 3	13/11/2014	600	175800 - 176400 s	237.5	362.5
2	2	First stage	1	OPN4 3	13/11/2014	600	176400 - 177000 s	579.8	20.2
2	2	First stage	1	OPN4 3	13/11/2014	600	177000 - 177600 s	600	0
2	2	First stage	1	OPN4 3	13/11/2014	600	177600 - 178200 s	600	0
2	2	First stage	1	OPN4 3	13/11/2014	600	178200 - 178800 s	600	0
2	2	First stage	1	OPN4 3	13/11/2014	600	178800 - 179400 s	525.5	74.5
2	2	First stage	1	OPN4 3	13/11/2014	600	179400 - 180000 s	471.5	128.5
2	2	First stage	1	OPN4 3	13/11/2014	600	180000 - 180600 s	372.8	227.2
2	2	First stage	1	OPN4 3	13/11/2014	600	180600 - 181200 s	600	0
2	2	First stage	1	OPN4 3	13/11/2014	600	181200 - 181800 s	527.5	72.5
2	2	First stage	1	OPN4 3	13/11/2014	600	181800 - 182400 s	600	0
2	2	First stage	1	OPN4 3	13/11/2014	600	182400 - 183000 s	600	0
2	2	First stage	1	OPN4 3	13/11/2014	600	183000 - 183600 s	600	0
2	2	First stage	1	OPN4 3	13/11/2014	600	183600 - 184200 s	600	0
2	2	First stage	1	OPN4 3	13/11/2014	600	184200 - 184800 s	600	0
2	2	First stage	1	OPN4 3	13/11/2014	600	184800 - 185400 s	600	0
2	2	First stage	1	OPN4 3	13/11/2014	600	185400 - 186000 s	600	0
2	2	First stage	1	OPN4 3	13/11/2014	600	186000 - 186600 s	600	0
2	2	First stage	1	OPN4 3	13/11/2014	600	186600 - 187200 s	600	0
2	2	First stage	1	OPN4 3	13/11/2014	600	187200 - 187800 s	600	0
2	2	First stage	1	OPN4 3	13/11/2014	600	187800 - 188400 s	600	0
2	2	First stage	1	OPN4 3	13/11/2014	600	188400 - 189000 s	600	0
2	2	First stage	1	OPN4 3	13/11/2014	600	189000 - 189600 s	558.8	41.2
2	2	First stage	1	OPN4 3	13/11/2014	600	189600 - 190200 s	190.6	409.4
2	2	First stage	1	OPN4 3	13/11/2014	600	190200 - 190800 s	426	174
2	2	First stage	1	OPN4 3	13/11/2014	600	190800 - 191400 s	143.3	456.8
2	2	First stage	1	OPN4 3	13/11/2014	600	191400 - 192000 s	48.7	551.4
2	2	First stage	1	OPN4 3	13/11/2014	600	192000 - 192600 s	392.1	207.9
2	2	First stage	1	OPN4 3	13/11/2014	600	192600 - 193200 s	600	0
2	2	First stage	1	OPN4 3	13/11/2014	600	193200 - 193800 s	524.8	75.2
2	2	First stage	1	OPN4 3	13/11/2014	600	193800 - 194400 s	600	0
2	2	First stage	1	OPN4 3	13/11/2014	600	194400 - 195000 s	600	0
2	2	First stage	1	OPN4 3	13/11/2014	600	195000 - 195600 s	600	0
2	2	First stage	1	OPN4 3	13/11/2014	600	195600 - 196200 s	600	0
2	2	First stage	1	OPN4 3	13/11/2014	600	196200 - 196800 s	600	0
2	2	First stage	1	OPN4 3	13/11/2014	600	196800 - 197400 s	59.2	540.8
2	2	First stage	1	OPN4 3	13/11/2014	600	197400 - 198000 s	67.4	532.6
2	2	First stage	1	OPN4 3	13/11/2014	600	198000 - 198600 s	58.7	541.3
2	2	First stage	1	OPN4 3	13/11/2014	600	198600 - 199200 s	85.4	514.6
2	2	First stage	1	OPN4 3	13/11/2014	600	199200 - 199800 s	107.2	492.8
2	2	First stage	1	OPN4 3	13/11/2014	600	199800 - 200400 s	261.1	338.9
2	2	First stage	1	OPN4 3	13/11/2014	600	200400 - 201000 s	600	0
2	2	First stage	1	OPN4 3	13/11/2014	600	201000 - 201600 s	600	0
2	2	First stage	1	OPN4 3	13/11/2014	600	201600 - 202200 s	600	0
2	2	First stage	1	OPN4 3	13/11/2014	600	202200 - 202800 s	600	0
2	2	First stage	1	OPN4 3	13/11/2014	600	202800 - 203400 s	600	0
2	2	First stage	1	OPN4 3	13/11/2014	600	203400 - 204000 s	600	0
2	2	First stage	1	OPN4 3	13/11/2014	600	204000 - 204600 s	600	0
2	2	First stage	1	OPN4 3	13/11/2014	600	204600 - 205200 s	600	0
2	2	First stage	1	OPN4 3	13/11/2014	600	205200 - 205800 s	600	0
2	2	First stage	1	OPN4 3	13/11/2014	600	205800 - 206400 s	600	0
2	2	First stage	1	OPN4 3	13/11/2014	600	206400 - 207000 s	600	0
2	2	First stage	1	OPN4 3	13/11/2014	600	207000 - 207600 s	163.5	436.5
2	2	First stage	1	OPN4 3	13/11/2014	600	207600 - 208200 s	197	403.1
2	2	First stage	1	OPN4 3	13/11/2014	600	208200 - 208800 s	12.3	587.7
2	2	First stage	1	OPN4 3	13/11/2014	600	208800 - 209400 s	153.3	446.7
2	2	First stage	1	OPN4 3	13/11/2014	600	209400 - 210000 s	185.6	414.4
2	2	First stage	1	OPN4 3	13/11/2014	600	210000 - 210600 s	600	0
2	2	First stage	1	OPN4 3	13/11/2014	600	210600 - 211200 s	600	0
2	2	First stage	1	OPN4 3	13/11/2014	600	211200 - 211800 s	600	0
2	2	First stage	1	OPN4 3	13/11/2014	600	211800 - 212400 s	600	0
2	2	First stage	1	OPN4 3	13/11/2014	600	212400 - 213000 s	600	0
2	2	First stage	1	OPN4 3	13/11/2014	600	213000 - 213600 s	600	0
2	2	First stage	1	OPN4 3	13/11/2014	600	213600 - 214200 s	400.3	199.7
2	2	First stage	1	OPN4 3	13/11/2014	600	214200 - 214800 s	600	0
2	2	First stage	1	OPN4 3	13/11/2014	600	214800 - 215400 s	309.2	290.8
2	2	First stage	1	OPN4 3	13/11/2014	600	215400 - 216000 s	139.7	460.3
3	4	First stage	1	OPN4 1	13/11/2014	600	0 - 600 secs.	600	0
3	4	First stage	1	OPN4 1	13/11/2014	600	600 - 1200 secs.	600	0
3	4	First stage	1	OPN4 1	13/11/2014	600	1200 - 1800 secs.	600	0
3	4	First stage	1	OPN4 1	13/11/2014	600	1800 - 2400 secs.	600	0
3	4	First stage	1	OPN4 1	13/11/2014	600	2400 - 3000 secs.	600	0
3	4	First stage	1	OPN4 1	13/11/2014	600	3000 - 3600 secs.	600	0
3	4	First stage	1	OPN4 1	13/11/2014	600	3600 - 4200 secs.	600	0
3	4	First stage	1	OPN4 1	13/11/2014	600	4200 - 4800 secs.	600	0
3	4	First stage	1	OPN4 1	13/11/2014	600	4800 - 5400 secs.	600	0
3	4	First stage	1	OPN4 1	13/11/2014	600	5400 - 6000 secs.	600	0
3	4	First stage	1	OPN4 1	13/11/2014	600	6000 - 6600 secs.	600	0
3	4	First stage	1	OPN4 1	13/11/2014	600	6600 - 7200 secs.	600	0
3	4	First stage	1	OPN4 1	13/11/2014	600	7200 - 7800 secs.	600	0
3	4	First stage	1	OPN4 1	13/11/2014	600	7800 - 8400 secs.	600	0
3	4	First stage	1	OPN4 1	13/11/2014	600	8400 - 9000 secs.	600	0
3	4	First stage	1	OPN4 1	13/11/2014	600	9000 - 9600 secs.	600	0
3	4	First stage	1	OPN4 1	13/11/2014	600	9600 - 10200 secs	552.6	47.4
3	4	First stage	1	OPN4 1	13/11/2014	600	10200 - 10800 sec	556.2	43.8
3	4	First stage	1	OPN4 1	13/11/2014	600	10800 - 11400 sec	600	0
3	4	First stage	1	OPN4 1	13/11/2014	600	11400 - 12000 sec	600	0
3	4	First stage	1	OPN4 1	13/11/2014	600	12000 - 12600 sec	600	0
3	4	First stage	1	OPN4 1	13/11/2014	600	12600 - 13200 sec	600	0
3	4	First stage	1	OPN4 1	13/11/2014	600	13200 - 13800 sec	600	0
3	4	First stage	1	OPN4 1	13/11/2014	600	13800 - 14400 sec	600	0
3	4	First stage	1	OPN4 1	13/11/2014	600	14400 - 15000 sec	600	0
3	4	First stage	1	OPN4 1	13/11/2014	600	15000 - 15600 sec	600	0
3	4	First stage	1	OPN4 1	13/11/2014	600	15600 - 16200 sec	600	0
3	4	First stage	1	OPN4 1	13/11/2014	600	16200 - 16800 sec	335.9	264.1
3	4	First stage	1	OPN4 1	13/11/2014	600	16800 - 17400 sec	600	0
3	4	First stage	1	OPN4 1	13/11/2014	600	17400 - 18000 sec	600	0
3	4	First stage	1	OPN4 1	13/11/2014	600	18000 - 18600 sec	250	350
3	4	First stage	1	OPN4 1	13/11/2014	600	18600 - 19200 sec	600	0
3	4	First stage	1	OPN4 1	13/11/2014	600	19200 - 19800 sec	226.5	373.5
3	4	First stage	1	OPN4 1	13/11/2014	600	19800 - 20400 sec	80.1	519.9
3	4	First stage	1	OPN4 1	13/11/2014	600	20400 - 21000 sec	99.8	500.2
3	4	First stage	1	OPN4 1	13/11/2014	600	21000 - 21600 sec	131.6	468.4
3	4	First stage	1	OPN4 1	13/11/2014	600	21600 - 22200 sec	18.1	581.9
3	4	First stage	1	OPN4 1	13/11/2014	600	22200 - 22800 sec	47.3	552.7
3	4	First stage	1	OPN4 1	13/11/2014	600	22800 - 23400 sec	156.4	443.6
3	4	First stage	1	OPN4 1	13/11/2014	600	23400 - 24000 sec	355.6	244.4
3	4	First stage	1	OPN4 1	13/11/2014	600	24000 - 24600 sec	600	0
3	4	First stage	1	OPN4 1	13/11/2014	600	24600 - 25200 sec	600	0
3	4	First stage	1	OPN4 1	13/11/2014	600	25200 - 25800 sec	600	0
3	4	First stage	1	OPN4 1	13/11/2014	600	25800 - 26400 sec	600	0
3	4	First stage	1	OPN4 1	13/11/2014	600	26400 - 27000 sec	600	0
3	4	First stage	1	OPN4 1	13/11/2014	600	27000 - 27600 sec	600	0
3	4	First stage	1	OPN4 1	13/11/2014	600	27600 - 28200 sec	600	0
3	4	First stage	1	OPN4 1	13/11/2014	600	28200 - 28800 sec	600	0
3	4	First stage	1	OPN4 1	13/11/2014	600	28800 - 29400 sec	219	381
3	4	First stage	1	OPN4 1	13/11/2014	600	29400 - 30000 sec	53.2	546.8
3	4	First stage	1	OPN4 1	13/11/2014	600	30000 - 30600 sec	44.2	555.8
3	4	First stage	1	OPN4 1	13/11/2014	600	30600 - 31200 sec	24.1	575.9
3	4	First stage	1	OPN4 1	13/11/2014	600	31200 - 31800 sec	55.2	544.8
3	4	First stage	1	OPN4 1	13/11/2014	600	31800 - 32400 sec	2	598
3	4	First stage	1	OPN4 1	13/11/2014	600	32400 - 33000 sec	1	599
3	4	First stage	1	OPN4 1	13/11/2014	600	33000 - 33600 sec	17.1	582.9
3	4	First stage	1	OPN4 1	13/11/2014	600	33600 - 34200 sec	69.4	530.6
3	4	First stage	1	OPN4 1	13/11/2014	600	34200 - 34800 sec	579.2	20.8
3	4	First stage	1	OPN4 1	13/11/2014	600	34800 - 35400 sec	534.6	65.4
3	4	First stage	1	OPN4 1	13/11/2014	600	35400 - 36000 sec	600	0
3	4	First stage	1	OPN4 1	13/11/2014	600	36000 - 36600 sec	600	0
3	4	First stage	1	OPN4 1	13/11/2014	600	36600 - 37200 sec	600	0
3	4	First stage	1	OPN4 1	13/11/2014	600	37200 - 37800 sec	532.6	67.4
3	4	First stage	1	OPN4 1	13/11/2014	600	37800 - 38400 sec	410.5	189.5
3	4	First stage	1	OPN4 1	13/11/2014	600	38400 - 39000 sec	31	569
3	4	First stage	1	OPN4 1	13/11/2014	600	39000 - 39600 sec	148.8	451.2
3	4	First stage	1	OPN4 1	13/11/2014	600	39600 - 40200 sec	91.2	508.8
3	4	First stage	1	OPN4 1	13/11/2014	600	40200 - 40800 sec	28.1	571.9
3	4	First stage	1	OPN4 1	13/11/2014	600	40800 - 41400 sec	35.7	564.3
3	4	First stage	1	OPN4 1	13/11/2014	600	41400 - 42000 sec	136.9	463.1
3	4	First stage	1	OPN4 1	13/11/2014	600	42000 - 42600 sec	554.3	45.7
3	4	First stage	1	OPN4 1	13/11/2014	600	42600 - 43200 sec	208.1	392
3	4	First stage	1	OPN4 1	13/11/2014	600	43200 - 43800 sec	56	544
3	4	First stage	1	OPN4 1	13/11/2014	600	43800 - 44400 sec	20.1	579.9
3	4	First stage	1	OPN4 1	13/11/2014	600	44400 - 45000 sec	147.3	452.7
3	4	First stage	1	OPN4 1	13/11/2014	600	45000 - 45600 sec	31.7	568.3
3	4	First stage	1	OPN4 1	13/11/2014	600	45600 - 46200 sec	25.2	574.8
3	4	First stage	1	OPN4 1	13/11/2014	600	46200 - 46800 sec	61.4	538.6
3	4	First stage	1	OPN4 1	13/11/2014	600	46800 - 47400 sec	104.3	495.7
3	4	First stage	1	OPN4 1	13/11/2014	600	47400 - 48000 sec	67.8	532.2
3	4	First stage	1	OPN4 1	13/11/2014	600	48000 - 48600 sec	151.1	448.9
3	4	First stage	1	OPN4 1	13/11/2014	600	48600 - 49200 sec	537.7	62.4
3	4	First stage	1	OPN4 1	13/11/2014	600	49200 - 49800 sec	559.4	40.6
3	4	First stage	1	OPN4 1	13/11/2014	600	49800 - 50400 sec	484.6	115.4
3	4	First stage	1	OPN4 1	13/11/2014	600	50400 - 51000 sec	38.3	561.7
3	4	First stage	1	OPN4 1	13/11/2014	600	51000 - 51600 sec	15.6	584.4
3	4	First stage	1	OPN4 1	13/11/2014	600	51600 - 52200 sec	9	591
3	4	First stage	1	OPN4 1	13/11/2014	600	52200 - 52800 sec	29.8	570.2
3	4	First stage	1	OPN4 1	13/11/2014	600	52800 - 53400 sec	23.1	576.9
3	4	First stage	1	OPN4 1	13/11/2014	600	53400 - 54000 sec	1	599
3	4	First stage	1	OPN4 1	13/11/2014	600	54000 - 54600 sec	0	600
3	4	First stage	1	OPN4 1	13/11/2014	600	54600 - 55200 sec	104.3	495.7
3	4	First stage	1	OPN4 1	13/11/2014	600	55200 - 55800 sec	103.6	496.4
3	4	First stage	1	OPN4 1	13/11/2014	600	55800 - 56400 sec	124	476
3	4	First stage	1	OPN4 1	13/11/2014	600	56400 - 57000 sec	38.7	561.3
3	4	First stage	1	OPN4 1	13/11/2014	600	57000 - 57600 sec	145.4	454.6
3	4	First stage	1	OPN4 1	13/11/2014	600	57600 - 58200 sec	498.4	101.6
3	4	First stage	1	OPN4 1	13/11/2014	600	58200 - 58800 sec	59.9	540.1
3	4	First stage	1	OPN4 1	13/11/2014	600	58800 - 59400 sec	60.4	539.6
3	4	First stage	1	OPN4 1	13/11/2014	600	59400 - 60000 sec	4	596
3	4	First stage	1	OPN4 1	13/11/2014	600	60000 - 60600 sec	43.4	556.6
3	4	First stage	1	OPN4 1	13/11/2014	600	60600 - 61200 sec	44.5	555.5
3	4	First stage	1	OPN4 1	13/11/2014	600	61200 - 61800 sec	493.6	106.4
3	4	First stage	1	OPN4 1	13/11/2014	600	61800 - 62400 sec	550.6	49.4
3	4	First stage	1	OPN4 1	13/11/2014	600	62400 - 63000 sec	600	0
3	4	First stage	1	OPN4 1	13/11/2014	600	63000 - 63600 sec	600	0
3	4	First stage	1	OPN4 1	13/11/2014	600	63600 - 64200 sec	192.2	407.8
3	4	First stage	1	OPN4 1	13/11/2014	600	64200 - 64800 sec	5.4	594.6
3	4	First stage	1	OPN4 1	13/11/2014	600	64800 - 65400 sec	0	600
3	4	First stage	1	OPN4 1	13/11/2014	600	65400 - 66000 sec	52.2	547.8
3	4	First stage	1	OPN4 1	13/11/2014	600	66000 - 66600 sec	55.4	544.6
3	4	First stage	1	OPN4 1	13/11/2014	600	66600 - 67200 sec	76.2	523.8
3	4	First stage	1	OPN4 1	13/11/2014	600	67200 - 67800 sec	30.5	569.5
3	4	First stage	1	OPN4 1	13/11/2014	600	67800 - 68400 sec	44.3	555.7
3	4	First stage	1	OPN4 1	13/11/2014	600	68400 - 69000 sec	69.7	530.3
3	4	First stage	1	OPN4 1	13/11/2014	600	69000 - 69600 sec	18.1	581.9
3	4	First stage	1	OPN4 1	13/11/2014	600	69600 - 70200 sec	12.4	587.6
3	4	First stage	1	OPN4 1	13/11/2014	600	70200 - 70800 sec	38.5	561.5
3	4	First stage	1	OPN4 1	13/11/2014	600	70800 - 71400 sec	72.5	527.5
3	4	First stage	1	OPN4 1	13/11/2014	600	71400 - 72000 sec	36.1	564
3	4	First stage	1	OPN4 1	13/11/2014	600	72000 - 72600 sec	298.7	301.4
3	4	First stage	1	OPN4 1	13/11/2014	600	72600 - 73200 sec	600	0
3	4	First stage	1	OPN4 1	13/11/2014	600	73200 - 73800 sec	600	0
3	4	First stage	1	OPN4 1	13/11/2014	600	73800 - 74400 sec	528.8	71.2
3	4	First stage	1	OPN4 1	13/11/2014	600	74400 - 75000 sec	346.4	253.6
3	4	First stage	1	OPN4 1	13/11/2014	600	75000 - 75600 sec	7.6	592.4
3	4	First stage	1	OPN4 1	13/11/2014	600	75600 - 76200 sec	8.1	591.9
3	4	First stage	1	OPN4 1	13/11/2014	600	76200 - 76800 sec	14.3	585.7
3	4	First stage	1	OPN4 1	13/11/2014	600	76800 - 77400 sec	3	597
3	4	First stage	1	OPN4 1	13/11/2014	600	77400 - 78000 sec	3	597
3	4	First stage	1	OPN4 1	13/11/2014	600	78000 - 78600 sec	14.1	585.9
3	4	First stage	1	OPN4 1	13/11/2014	600	78600 - 79200 sec	60.2	539.8
3	4	First stage	1	OPN4 1	13/11/2014	600	79200 - 79800 sec	125.6	474.4
3	4	First stage	1	OPN4 1	13/11/2014	600	79800 - 80400 sec	297.1	302.9
3	4	First stage	1	OPN4 1	13/11/2014	600	80400 - 81000 sec	466.1	133.9
3	4	First stage	1	OPN4 1	13/11/2014	600	81000 - 81600 sec	241.1	358.9
3	4	First stage	1	OPN4 1	13/11/2014	600	81600 - 82200 sec	40.2	559.8
3	4	First stage	1	OPN4 1	13/11/2014	600	82200 - 82800 sec	7	593
3	4	First stage	1	OPN4 1	13/11/2014	600	82800 - 83400 sec	95.8	504.2
3	4	First stage	1	OPN4 1	13/11/2014	600	83400 - 84000 sec	509.7	90.3
3	4	First stage	1	OPN4 1	13/11/2014	600	84000 - 84600 sec	600	0
3	4	First stage	1	OPN4 1	13/11/2014	600	84600 - 85200 sec	600	0
3	4	First stage	1	OPN4 1	13/11/2014	600	85200 - 85800 sec	600	0
3	4	First stage	1	OPN4 1	13/11/2014	600	85800 - 86400 sec	600	0
3	4	First stage	1	OPN4 1	13/11/2014	600	86400 - 87000 sec	600	0
3	4	First stage	1	OPN4 1	13/11/2014	600	87000 - 87600 sec	600	0
3	4	First stage	1	OPN4 1	13/11/2014	600	87600 - 88200 sec	600	0
3	4	First stage	1	OPN4 1	13/11/2014	600	88200 - 88800 sec	600	0
3	4	First stage	1	OPN4 1	13/11/2014	600	88800 - 89400 sec	600	0
3	4	First stage	1	OPN4 1	13/11/2014	600	89400 - 90000 sec	600	0
3	4	First stage	1	OPN4 1	13/11/2014	600	90000 - 90600 sec	600	0
3	4	First stage	1	OPN4 1	13/11/2014	600	90600 - 91200 sec	600	0
3	4	First stage	1	OPN4 1	13/11/2014	600	91200 - 91800 sec	600	0
3	4	First stage	1	OPN4 1	13/11/2014	600	91800 - 92400 sec	600	0
3	4	First stage	1	OPN4 1	13/11/2014	600	92400 - 93000 sec	600	0
3	4	First stage	1	OPN4 1	13/11/2014	600	93000 - 93600 sec	600	0
3	4	First stage	1	OPN4 1	13/11/2014	600	93600 - 94200 sec	410.5	189.6
3	4	First stage	1	OPN4 1	13/11/2014	600	94200 - 94800 sec	135.3	464.7
3	4	First stage	1	OPN4 1	13/11/2014	600	94800 - 95400 sec	73.8	526.2
3	4	First stage	1	OPN4 1	13/11/2014	600	95400 - 96000 sec	210.8	389.3
3	4	First stage	1	OPN4 1	13/11/2014	600	96000 - 96600 sec	334.4	265.6
3	4	First stage	1	OPN4 1	13/11/2014	600	96600 - 97200 sec	600	0
3	4	First stage	1	OPN4 1	13/11/2014	600	97200 - 97800 sec	600	0
3	4	First stage	1	OPN4 1	13/11/2014	600	97800 - 98400 sec	600	0
3	4	First stage	1	OPN4 1	13/11/2014	600	98400 - 99000 sec	600	0
3	4	First stage	1	OPN4 1	13/11/2014	600	99000 - 99600 sec	600	0
3	4	First stage	1	OPN4 1	13/11/2014	600	99600 - 100200 se	600	0
3	4	First stage	1	OPN4 1	13/11/2014	600	100200 - 100800 s	600	0
3	4	First stage	1	OPN4 1	13/11/2014	600	100800 - 101400 s	600	0
3	4	First stage	1	OPN4 1	13/11/2014	600	101400 - 102000 s	600	0
3	4	First stage	1	OPN4 1	13/11/2014	600	102000 - 102600 s	600	0
3	4	First stage	1	OPN4 1	13/11/2014	600	102600 - 103200 s	600	0
3	4	First stage	1	OPN4 1	13/11/2014	600	103200 - 103800 s	600	0
3	4	First stage	1	OPN4 1	13/11/2014	600	103800 - 104400 s	600	0
3	4	First stage	1	OPN4 1	13/11/2014	600	104400 - 105000 s	600	0
3	4	First stage	1	OPN4 1	13/11/2014	600	105000 - 105600 s	600	0
3	4	First stage	1	OPN4 1	13/11/2014	600	105600 - 106200 s	600	0
3	4	First stage	1	OPN4 1	13/11/2014	600	106200 - 106800 s	600	0
3	4	First stage	1	OPN4 1	13/11/2014	600	106800 - 107400 s	600	0
3	4	First stage	1	OPN4 1	13/11/2014	600	107400 - 108000 s	600	0
3	4	First stage	1	OPN4 1	13/11/2014	600	108000 - 108600 s	157.7	442.4
3	4	First stage	1	OPN4 1	13/11/2014	600	108600 - 109200 s	51	549
3	4	First stage	1	OPN4 1	13/11/2014	600	109200 - 109800 s	63.6	536.4
3	4	First stage	1	OPN4 1	13/11/2014	600	109800 - 110400 s	17.1	582.9
3	4	First stage	1	OPN4 1	13/11/2014	600	110400 - 111000 s	8.1	591.9
3	4	First stage	1	OPN4 1	13/11/2014	600	111000 - 111600 s	5	595
3	4	First stage	1	OPN4 1	13/11/2014	600	111600 - 112200 s	43.5	556.5
3	4	First stage	1	OPN4 1	13/11/2014	600	112200 - 112800 s	47.5	552.5
3	4	First stage	1	OPN4 1	13/11/2014	600	112800 - 113400 s	342.5	257.5
3	4	First stage	1	OPN4 1	13/11/2014	600	113400 - 114000 s	491.9	108.1
3	4	First stage	1	OPN4 1	13/11/2014	600	114000 - 114600 s	600	0
3	4	First stage	1	OPN4 1	13/11/2014	600	114600 - 115200 s	600	0
3	4	First stage	1	OPN4 1	13/11/2014	600	115200 - 115800 s	600	0
3	4	First stage	1	OPN4 1	13/11/2014	600	115800 - 116400 s	281.8	318.2
3	4	First stage	1	OPN4 1	13/11/2014	600	116400 - 117000 s	35.2	564.8
3	4	First stage	1	OPN4 1	13/11/2014	600	117000 - 117600 s	31.1	568.9
3	4	First stage	1	OPN4 1	13/11/2014	600	117600 - 118200 s	35.3	564.7
3	4	First stage	1	OPN4 1	13/11/2014	600	118200 - 118800 s	21.2	578.8
3	4	First stage	1	OPN4 1	13/11/2014	600	118800 - 119400 s	5	595
3	4	First stage	1	OPN4 1	13/11/2014	600	119400 - 120000 s	9	591
3	4	First stage	1	OPN4 1	13/11/2014	600	120000 - 120600 s	19.1	580.9
3	4	First stage	1	OPN4 1	13/11/2014	600	120600 - 121200 s	95.5	504.5
3	4	First stage	1	OPN4 1	13/11/2014	600	121200 - 121800 s	6	594
3	4	First stage	1	OPN4 1	13/11/2014	600	121800 - 122400 s	25.2	574.8
3	4	First stage	1	OPN4 1	13/11/2014	600	122400 - 123000 s	38.1	561.9
3	4	First stage	1	OPN4 1	13/11/2014	600	123000 - 123600 s	82.3	517.7
3	4	First stage	1	OPN4 1	13/11/2014	600	123600 - 124200 s	32.3	567.7
3	4	First stage	1	OPN4 1	13/11/2014	600	124200 - 124800 s	44.2	555.8
3	4	First stage	1	OPN4 1	13/11/2014	600	124800 - 125400 s	121.9	478.2
3	4	First stage	1	OPN4 1	13/11/2014	600	125400 - 126000 s	550.6	49.4
3	4	First stage	1	OPN4 1	13/11/2014	600	126000 - 126600 s	600	0
3	4	First stage	1	OPN4 1	13/11/2014	600	126600 - 127200 s	600	0
3	4	First stage	1	OPN4 1	13/11/2014	600	127200 - 127800 s	600	0
3	4	First stage	1	OPN4 1	13/11/2014	600	127800 - 128400 s	600	0
3	4	First stage	1	OPN4 1	13/11/2014	600	128400 - 129000 s	51.3	548.7
3	4	First stage	1	OPN4 1	13/11/2014	600	129000 - 129600 s	2	598
3	4	First stage	1	OPN4 1	13/11/2014	600	129600 - 130200 s	59.7	540.3
3	4	First stage	1	OPN4 1	13/11/2014	600	130200 - 130800 s	68.4	531.6
3	4	First stage	1	OPN4 1	13/11/2014	600	130800 - 131400 s	32.3	567.7
3	4	First stage	1	OPN4 1	13/11/2014	600	131400 - 132000 s	31.4	568.6
3	4	First stage	1	OPN4 1	13/11/2014	600	132000 - 132600 s	43.5	556.5
3	4	First stage	1	OPN4 1	13/11/2014	600	132600 - 133200 s	152.3	447.7
3	4	First stage	1	OPN4 1	13/11/2014	600	133200 - 133800 s	19.2	580.8
3	4	First stage	1	OPN4 1	13/11/2014	600	133800 - 134400 s	34.1	565.9
3	4	First stage	1	OPN4 1	13/11/2014	600	134400 - 135000 s	0	600
3	4	First stage	1	OPN4 1	13/11/2014	600	135000 - 135600 s	61.1	538.9
3	4	First stage	1	OPN4 1	13/11/2014	600	135600 - 136200 s	33.7	566.3
3	4	First stage	1	OPN4 1	13/11/2014	600	136200 - 136800 s	34.5	565.5
3	4	First stage	1	OPN4 1	13/11/2014	600	136800 - 137400 s	0	600
3	4	First stage	1	OPN4 1	13/11/2014	600	137400 - 138000 s	157.2	442.8
3	4	First stage	1	OPN4 1	13/11/2014	600	138000 - 138600 s	496.6	103.4
3	4	First stage	1	OPN4 1	13/11/2014	600	138600 - 139200 s	600	0
3	4	First stage	1	OPN4 1	13/11/2014	600	139200 - 139800 s	512.6	87.4
3	4	First stage	1	OPN4 1	13/11/2014	600	139800 - 140400 s	344	256
3	4	First stage	1	OPN4 1	13/11/2014	600	140400 - 141000 s	4.2	595.8
3	4	First stage	1	OPN4 1	13/11/2014	600	141000 - 141600 s	45.3	554.7
3	4	First stage	1	OPN4 1	13/11/2014	600	141600 - 142200 s	3.1	596.9
3	4	First stage	1	OPN4 1	13/11/2014	600	142200 - 142800 s	0	600
3	4	First stage	1	OPN4 1	13/11/2014	600	142800 - 143400 s	0	600
3	4	First stage	1	OPN4 1	13/11/2014	600	143400 - 144000 s	101.5	498.5
3	4	First stage	1	OPN4 1	13/11/2014	600	144000 - 144600 s	12.4	587.6
3	4	First stage	1	OPN4 1	13/11/2014	600	144600 - 145200 s	41.8	558.2
3	4	First stage	1	OPN4 1	13/11/2014	600	145200 - 145800 s	37.2	562.8
3	4	First stage	1	OPN4 1	13/11/2014	600	145800 - 146400 s	38.5	561.5
3	4	First stage	1	OPN4 1	13/11/2014	600	146400 - 147000 s	72.9	527.1
3	4	First stage	1	OPN4 1	13/11/2014	600	147000 - 147600 s	27.2	572.8
3	4	First stage	1	OPN4 1	13/11/2014	600	147600 - 148200 s	212.4	387.6
3	4	First stage	1	OPN4 1	13/11/2014	600	148200 - 148800 s	453.7	146.3
3	4	First stage	1	OPN4 1	13/11/2014	600	148800 - 149400 s	39.7	560.3
3	4	First stage	1	OPN4 1	13/11/2014	600	149400 - 150000 s	5	595
3	4	First stage	1	OPN4 1	13/11/2014	600	150000 - 150600 s	58.8	541.2
3	4	First stage	1	OPN4 1	13/11/2014	600	150600 - 151200 s	6	594
3	4	First stage	1	OPN4 1	13/11/2014	600	151200 - 151800 s	21.1	578.9
3	4	First stage	1	OPN4 1	13/11/2014	600	151800 - 152400 s	63.3	536.7
3	4	First stage	1	OPN4 1	13/11/2014	600	152400 - 153000 s	102.3	497.7
3	4	First stage	1	OPN4 1	13/11/2014	600	153000 - 153600 s	530.5	69.5
3	4	First stage	1	OPN4 1	13/11/2014	600	153600 - 154200 s	557.2	42.8
3	4	First stage	1	OPN4 1	13/11/2014	600	154200 - 154800 s	600	0
3	4	First stage	1	OPN4 1	13/11/2014	600	154800 - 155400 s	434.7	165.3
3	4	First stage	1	OPN4 1	13/11/2014	600	155400 - 156000 s	46.9	553.1
3	4	First stage	1	OPN4 1	13/11/2014	600	156000 - 156600 s	65.8	534.2
3	4	First stage	1	OPN4 1	13/11/2014	600	156600 - 157200 s	7	593
3	4	First stage	1	OPN4 1	13/11/2014	600	157200 - 157800 s	35.1	564.9
3	4	First stage	1	OPN4 1	13/11/2014	600	157800 - 158400 s	37.9	562.1
3	4	First stage	1	OPN4 1	13/11/2014	600	158400 - 159000 s	64.7	535.3
3	4	First stage	1	OPN4 1	13/11/2014	600	159000 - 159600 s	9	591
3	4	First stage	1	OPN4 1	13/11/2014	600	159600 - 160200 s	51.5	548.5
3	4	First stage	1	OPN4 1	13/11/2014	600	160200 - 160800 s	565	35
3	4	First stage	1	OPN4 1	13/11/2014	600	160800 - 161400 s	600	0
3	4	First stage	1	OPN4 1	13/11/2014	600	161400 - 162000 s	600	0
3	4	First stage	1	OPN4 1	13/11/2014	600	162000 - 162600 s	492.4	107.6
3	4	First stage	1	OPN4 1	13/11/2014	600	162600 - 163200 s	600	0
3	4	First stage	1	OPN4 1	13/11/2014	600	163200 - 163800 s	600	0
3	4	First stage	1	OPN4 1	13/11/2014	600	163800 - 164400 s	600	0
3	4	First stage	1	OPN4 1	13/11/2014	600	164400 - 165000 s	364.2	235.8
3	4	First stage	1	OPN4 1	13/11/2014	600	165000 - 165600 s	117.1	482.9
3	4	First stage	1	OPN4 1	13/11/2014	600	165600 - 166200 s	95.6	504.4
3	4	First stage	1	OPN4 1	13/11/2014	600	166200 - 166800 s	3.1	596.9
3	4	First stage	1	OPN4 1	13/11/2014	600	166800 - 167400 s	190.2	409.8
3	4	First stage	1	OPN4 1	13/11/2014	600	167400 - 168000 s	151.7	448.3
3	4	First stage	1	OPN4 1	13/11/2014	600	168000 - 168600 s	80.3	519.8
3	4	First stage	1	OPN4 1	13/11/2014	600	168600 - 169200 s	20.5	579.5
3	4	First stage	1	OPN4 1	13/11/2014	600	169200 - 169800 s	383.2	216.8
3	4	First stage	1	OPN4 1	13/11/2014	600	169800 - 170400 s	600	0
3	4	First stage	1	OPN4 1	13/11/2014	600	170400 - 171000 s	142.4	457.6
3	4	First stage	1	OPN4 1	13/11/2014	600	171000 - 171600 s	305.8	294.2
3	4	First stage	1	OPN4 1	13/11/2014	600	171600 - 172200 s	600	0
3	4	First stage	1	OPN4 1	13/11/2014	600	172200 - 172800 s	600	0
3	4	First stage	1	OPN4 1	13/11/2014	600	172800 - 173400 s	600	0
3	4	First stage	1	OPN4 1	13/11/2014	600	173400 - 174000 s	600	0
3	4	First stage	1	OPN4 1	13/11/2014	600	174000 - 174600 s	600	0
3	4	First stage	1	OPN4 1	13/11/2014	600	174600 - 175200 s	462.3	137.7
3	4	First stage	1	OPN4 1	13/11/2014	600	175200 - 175800 s	152.6	447.4
3	4	First stage	1	OPN4 1	13/11/2014	600	175800 - 176400 s	600	0
3	4	First stage	1	OPN4 1	13/11/2014	600	176400 - 177000 s	600	0
3	4	First stage	1	OPN4 1	13/11/2014	600	177000 - 177600 s	600	0
3	4	First stage	1	OPN4 1	13/11/2014	600	177600 - 178200 s	559.7	40.3
3	4	First stage	1	OPN4 1	13/11/2014	600	178200 - 178800 s	482.9	117.1
3	4	First stage	1	OPN4 1	13/11/2014	600	178800 - 179400 s	319.5	280.5
3	4	First stage	1	OPN4 1	13/11/2014	600	179400 - 180000 s	600	0
3	4	First stage	1	OPN4 1	13/11/2014	600	180000 - 180600 s	600	0
3	4	First stage	1	OPN4 1	13/11/2014	600	180600 - 181200 s	600	0
3	4	First stage	1	OPN4 1	13/11/2014	600	181200 - 181800 s	600	0
3	4	First stage	1	OPN4 1	13/11/2014	600	181800 - 182400 s	600	0
3	4	First stage	1	OPN4 1	13/11/2014	600	182400 - 183000 s	600	0
3	4	First stage	1	OPN4 1	13/11/2014	600	183000 - 183600 s	556.8	43.2
3	4	First stage	1	OPN4 1	13/11/2014	600	183600 - 184200 s	600	0
3	4	First stage	1	OPN4 1	13/11/2014	600	184200 - 184800 s	600	0
3	4	First stage	1	OPN4 1	13/11/2014	600	184800 - 185400 s	600	0
3	4	First stage	1	OPN4 1	13/11/2014	600	185400 - 186000 s	446.9	153.1
3	4	First stage	1	OPN4 1	13/11/2014	600	186000 - 186600 s	600	0
3	4	First stage	1	OPN4 1	13/11/2014	600	186600 - 187200 s	600	0
3	4	First stage	1	OPN4 1	13/11/2014	600	187200 - 187800 s	600	0
3	4	First stage	1	OPN4 1	13/11/2014	600	187800 - 188400 s	559.7	40.3
3	4	First stage	1	OPN4 1	13/11/2014	600	188400 - 189000 s	390.3	209.7
3	4	First stage	1	OPN4 1	13/11/2014	600	189000 - 189600 s	600	0
3	4	First stage	1	OPN4 1	13/11/2014	600	189600 - 190200 s	600	0
3	4	First stage	1	OPN4 1	13/11/2014	600	190200 - 190800 s	346.9	253.1
3	4	First stage	1	OPN4 1	13/11/2014	600	190800 - 191400 s	41.7	558.3
3	4	First stage	1	OPN4 1	13/11/2014	600	191400 - 192000 s	128.3	471.8
3	4	First stage	1	OPN4 1	13/11/2014	600	192000 - 192600 s	1	599
3	4	First stage	1	OPN4 1	13/11/2014	600	192600 - 193200 s	9.5	590.5
3	4	First stage	1	OPN4 1	13/11/2014	600	193200 - 193800 s	57.4	542.6
3	4	First stage	1	OPN4 1	13/11/2014	600	193800 - 194400 s	18.2	581.8
3	4	First stage	1	OPN4 1	13/11/2014	600	194400 - 195000 s	38.2	561.8
3	4	First stage	1	OPN4 1	13/11/2014	600	195000 - 195600 s	576	24
3	4	First stage	1	OPN4 1	13/11/2014	600	195600 - 196200 s	600	0
3	4	First stage	1	OPN4 1	13/11/2014	600	196200 - 196800 s	548.4	51.6
3	4	First stage	1	OPN4 1	13/11/2014	600	196800 - 197400 s	600	0
3	4	First stage	1	OPN4 1	13/11/2014	600	197400 - 198000 s	600	0
3	4	First stage	1	OPN4 1	13/11/2014	600	198000 - 198600 s	600	0
3	4	First stage	1	OPN4 1	13/11/2014	600	198600 - 199200 s	600	0
3	4	First stage	1	OPN4 1	13/11/2014	600	199200 - 199800 s	600	0
3	4	First stage	1	OPN4 1	13/11/2014	600	199800 - 200400 s	175.4	424.6
3	4	First stage	1	OPN4 1	13/11/2014	600	200400 - 201000 s	70.6	529.4
3	4	First stage	1	OPN4 1	13/11/2014	600	201000 - 201600 s	115.8	484.2
3	4	First stage	1	OPN4 1	13/11/2014	600	201600 - 202200 s	136.1	464
3	4	First stage	1	OPN4 1	13/11/2014	600	202200 - 202800 s	14.4	585.6
3	4	First stage	1	OPN4 1	13/11/2014	600	202800 - 203400 s	12.1	587.9
3	4	First stage	1	OPN4 1	13/11/2014	600	203400 - 204000 s	0	600
3	4	First stage	1	OPN4 1	13/11/2014	600	204000 - 204600 s	43.6	556.4
3	4	First stage	1	OPN4 1	13/11/2014	600	204600 - 205200 s	0	600
3	4	First stage	1	OPN4 1	13/11/2014	600	205200 - 205800 s	41.3	558.7
3	4	First stage	1	OPN4 1	13/11/2014	600	205800 - 206400 s	348.8	251.2
3	4	First stage	1	OPN4 1	13/11/2014	600	206400 - 207000 s	553.6	46.4
3	4	First stage	1	OPN4 1	13/11/2014	600	207000 - 207600 s	598	2
3	4	First stage	1	OPN4 1	13/11/2014	600	207600 - 208200 s	64.8	535.2
3	4	First stage	1	OPN4 1	13/11/2014	600	208200 - 208800 s	103.2	496.8
3	4	First stage	1	OPN4 1	13/11/2014	600	208800 - 209400 s	1	599
3	4	First stage	1	OPN4 1	13/11/2014	600	209400 - 210000 s	41.2	558.8
3	4	First stage	1	OPN4 1	13/11/2014	600	210000 - 210600 s	1	599
3	4	First stage	1	OPN4 1	13/11/2014	600	210600 - 211200 s	408.9	191.1
3	4	First stage	1	OPN4 1	13/11/2014	600	211200 - 211800 s	26.2	573.8
3	4	First stage	1	OPN4 1	13/11/2014	600	211800 - 212400 s	137.2	462.8
3	4	First stage	1	OPN4 1	13/11/2014	600	212400 - 213000 s	5.1	594.9
3	4	First stage	1	OPN4 1	13/11/2014	600	213000 - 213600 s	43.6	556.4
3	4	First stage	1	OPN4 1	13/11/2014	600	213600 - 214200 s	117.8	482.2
3	4	First stage	1	OPN4 1	13/11/2014	600	214200 - 214800 s	498.3	101.7
3	4	First stage	1	OPN4 1	13/11/2014	600	214800 - 215400 s	550.9	49.1
3	4	First stage	1	OPN4 1	13/11/2014	600	215400 - 216000 s	600	0
4	3	First stage	1	OPN4 2	13/11/2014	600	0 - 600 secs.	600	0
4	3	First stage	1	OPN4 2	13/11/2014	600	600 - 1200 secs.	472	128
4	3	First stage	1	OPN4 2	13/11/2014	600	1200 - 1800 secs.	600	0
4	3	First stage	1	OPN4 2	13/11/2014	600	1800 - 2400 secs.	600	0
4	3	First stage	1	OPN4 2	13/11/2014	600	2400 - 3000 secs.	600	0
4	3	First stage	1	OPN4 2	13/11/2014	600	3000 - 3600 secs.	600	0
4	3	First stage	1	OPN4 2	13/11/2014	600	3600 - 4200 secs.	600	0
4	3	First stage	1	OPN4 2	13/11/2014	600	4200 - 4800 secs.	600	0
4	3	First stage	1	OPN4 2	13/11/2014	600	4800 - 5400 secs.	600	0
4	3	First stage	1	OPN4 2	13/11/2014	600	5400 - 6000 secs.	600	0
4	3	First stage	1	OPN4 2	13/11/2014	600	6000 - 6600 secs.	600	0
4	3	First stage	1	OPN4 2	13/11/2014	600	6600 - 7200 secs.	600	0
4	3	First stage	1	OPN4 2	13/11/2014	600	7200 - 7800 secs.	600	0
4	3	First stage	1	OPN4 2	13/11/2014	600	7800 - 8400 secs.	600	0
4	3	First stage	1	OPN4 2	13/11/2014	600	8400 - 9000 secs.	600	0
4	3	First stage	1	OPN4 2	13/11/2014	600	9000 - 9600 secs.	600	0
4	3	First stage	1	OPN4 2	13/11/2014	600	9600 - 10200 secs	600	0
4	3	First stage	1	OPN4 2	13/11/2014	600	10200 - 10800 sec	600	0
4	3	First stage	1	OPN4 2	13/11/2014	600	10800 - 11400 sec	600	0
4	3	First stage	1	OPN4 2	13/11/2014	600	11400 - 12000 sec	600	0
4	3	First stage	1	OPN4 2	13/11/2014	600	12000 - 12600 sec	600	0
4	3	First stage	1	OPN4 2	13/11/2014	600	12600 - 13200 sec	600	0
4	3	First stage	1	OPN4 2	13/11/2014	600	13200 - 13800 sec	600	0
4	3	First stage	1	OPN4 2	13/11/2014	600	13800 - 14400 sec	600	0
4	3	First stage	1	OPN4 2	13/11/2014	600	14400 - 15000 sec	600	0
4	3	First stage	1	OPN4 2	13/11/2014	600	15000 - 15600 sec	600	0
4	3	First stage	1	OPN4 2	13/11/2014	600	15600 - 16200 sec	600	0
4	3	First stage	1	OPN4 2	13/11/2014	600	16200 - 16800 sec	600	0
4	3	First stage	1	OPN4 2	13/11/2014	600	16800 - 17400 sec	600	0
4	3	First stage	1	OPN4 2	13/11/2014	600	17400 - 18000 sec	600	0
4	3	First stage	1	OPN4 2	13/11/2014	600	18000 - 18600 sec	600	0
4	3	First stage	1	OPN4 2	13/11/2014	600	18600 - 19200 sec	151.6	448.4
4	3	First stage	1	OPN4 2	13/11/2014	600	19200 - 19800 sec	54.3	545.7
4	3	First stage	1	OPN4 2	13/11/2014	600	19800 - 20400 sec	278	322.1
4	3	First stage	1	OPN4 2	13/11/2014	600	20400 - 21000 sec	600	0
4	3	First stage	1	OPN4 2	13/11/2014	600	21000 - 21600 sec	600	0
4	3	First stage	1	OPN4 2	13/11/2014	600	21600 - 22200 sec	600	0
4	3	First stage	1	OPN4 2	13/11/2014	600	22200 - 22800 sec	490.1	109.9
4	3	First stage	1	OPN4 2	13/11/2014	600	22800 - 23400 sec	600	0
4	3	First stage	1	OPN4 2	13/11/2014	600	23400 - 24000 sec	600	0
4	3	First stage	1	OPN4 2	13/11/2014	600	24000 - 24600 sec	379.6	220.4
4	3	First stage	1	OPN4 2	13/11/2014	600	24600 - 25200 sec	28.6	571.4
4	3	First stage	1	OPN4 2	13/11/2014	600	25200 - 25800 sec	29.5	570.5
4	3	First stage	1	OPN4 2	13/11/2014	600	25800 - 26400 sec	62.5	537.5
4	3	First stage	1	OPN4 2	13/11/2014	600	26400 - 27000 sec	411.5	188.5
4	3	First stage	1	OPN4 2	13/11/2014	600	27000 - 27600 sec	600	0
4	3	First stage	1	OPN4 2	13/11/2014	600	27600 - 28200 sec	600	0
4	3	First stage	1	OPN4 2	13/11/2014	600	28200 - 28800 sec	600	0
4	3	First stage	1	OPN4 2	13/11/2014	600	28800 - 29400 sec	277.6	322.4
4	3	First stage	1	OPN4 2	13/11/2014	600	29400 - 30000 sec	61.8	538.2
4	3	First stage	1	OPN4 2	13/11/2014	600	30000 - 30600 sec	58.4	541.6
4	3	First stage	1	OPN4 2	13/11/2014	600	30600 - 31200 sec	228.5	371.5
4	3	First stage	1	OPN4 2	13/11/2014	600	31200 - 31800 sec	600	0
4	3	First stage	1	OPN4 2	13/11/2014	600	31800 - 32400 sec	600	0
4	3	First stage	1	OPN4 2	13/11/2014	600	32400 - 33000 sec	320	280
4	3	First stage	1	OPN4 2	13/11/2014	600	33000 - 33600 sec	140.4	459.6
4	3	First stage	1	OPN4 2	13/11/2014	600	33600 - 34200 sec	74.2	525.8
4	3	First stage	1	OPN4 2	13/11/2014	600	34200 - 34800 sec	62.9	537.2
4	3	First stage	1	OPN4 2	13/11/2014	600	34800 - 35400 sec	82.4	517.6
4	3	First stage	1	OPN4 2	13/11/2014	600	35400 - 36000 sec	16.2	583.8
4	3	First stage	1	OPN4 2	13/11/2014	600	36000 - 36600 sec	150.9	449.1
4	3	First stage	1	OPN4 2	13/11/2014	600	36600 - 37200 sec	71.7	528.3
4	3	First stage	1	OPN4 2	13/11/2014	600	37200 - 37800 sec	247.4	352.6
4	3	First stage	1	OPN4 2	13/11/2014	600	37800 - 38400 sec	559	41
4	3	First stage	1	OPN4 2	13/11/2014	600	38400 - 39000 sec	600	0
4	3	First stage	1	OPN4 2	13/11/2014	600	39000 - 39600 sec	600	0
4	3	First stage	1	OPN4 2	13/11/2014	600	39600 - 40200 sec	529.5	70.5
4	3	First stage	1	OPN4 2	13/11/2014	600	40200 - 40800 sec	600	0
4	3	First stage	1	OPN4 2	13/11/2014	600	40800 - 41400 sec	600	0
4	3	First stage	1	OPN4 2	13/11/2014	600	41400 - 42000 sec	488.5	111.6
4	3	First stage	1	OPN4 2	13/11/2014	600	42000 - 42600 sec	68.3	531.7
4	3	First stage	1	OPN4 2	13/11/2014	600	42600 - 43200 sec	58.8	541.2
4	3	First stage	1	OPN4 2	13/11/2014	600	43200 - 43800 sec	4	596
4	3	First stage	1	OPN4 2	13/11/2014	600	43800 - 44400 sec	39.1	560.9
4	3	First stage	1	OPN4 2	13/11/2014	600	44400 - 45000 sec	124	476
4	3	First stage	1	OPN4 2	13/11/2014	600	45000 - 45600 sec	130.5	469.5
4	3	First stage	1	OPN4 2	13/11/2014	600	45600 - 46200 sec	51.2	548.8
4	3	First stage	1	OPN4 2	13/11/2014	600	46200 - 46800 sec	31.3	568.8
4	3	First stage	1	OPN4 2	13/11/2014	600	46800 - 47400 sec	15.1	584.9
4	3	First stage	1	OPN4 2	13/11/2014	600	47400 - 48000 sec	209.8	390.2
4	3	First stage	1	OPN4 2	13/11/2014	600	48000 - 48600 sec	378.8	221.2
4	3	First stage	1	OPN4 2	13/11/2014	600	48600 - 49200 sec	214	386
4	3	First stage	1	OPN4 2	13/11/2014	600	49200 - 49800 sec	113.4	486.6
4	3	First stage	1	OPN4 2	13/11/2014	600	49800 - 50400 sec	23.1	576.9
4	3	First stage	1	OPN4 2	13/11/2014	600	50400 - 51000 sec	51.2	548.8
4	3	First stage	1	OPN4 2	13/11/2014	600	51000 - 51600 sec	43.1	556.9
4	3	First stage	1	OPN4 2	13/11/2014	600	51600 - 52200 sec	72.4	527.6
4	3	First stage	1	OPN4 2	13/11/2014	600	52200 - 52800 sec	75.6	524.4
4	3	First stage	1	OPN4 2	13/11/2014	600	52800 - 53400 sec	25	575
4	3	First stage	1	OPN4 2	13/11/2014	600	53400 - 54000 sec	6	594
4	3	First stage	1	OPN4 2	13/11/2014	600	54000 - 54600 sec	9	591
4	3	First stage	1	OPN4 2	13/11/2014	600	54600 - 55200 sec	55.3	544.8
4	3	First stage	1	OPN4 2	13/11/2014	600	55200 - 55800 sec	414.1	185.9
4	3	First stage	1	OPN4 2	13/11/2014	600	55800 - 56400 sec	548.9	51.1
4	3	First stage	1	OPN4 2	13/11/2014	600	56400 - 57000 sec	600	0
4	3	First stage	1	OPN4 2	13/11/2014	600	57000 - 57600 sec	554.8	45.2
4	3	First stage	1	OPN4 2	13/11/2014	600	57600 - 58200 sec	473.9	126.1
4	3	First stage	1	OPN4 2	13/11/2014	600	58200 - 58800 sec	3	597
4	3	First stage	1	OPN4 2	13/11/2014	600	58800 - 59400 sec	377.8	222.2
4	3	First stage	1	OPN4 2	13/11/2014	600	59400 - 60000 sec	6	594
4	3	First stage	1	OPN4 2	13/11/2014	600	60000 - 60600 sec	45.4	554.6
4	3	First stage	1	OPN4 2	13/11/2014	600	60600 - 61200 sec	44.4	555.6
4	3	First stage	1	OPN4 2	13/11/2014	600	61200 - 61800 sec	50.5	549.5
4	3	First stage	1	OPN4 2	13/11/2014	600	61800 - 62400 sec	20.1	579.9
4	3	First stage	1	OPN4 2	13/11/2014	600	62400 - 63000 sec	83.8	516.2
4	3	First stage	1	OPN4 2	13/11/2014	600	63000 - 63600 sec	47.4	552.6
4	3	First stage	1	OPN4 2	13/11/2014	600	63600 - 64200 sec	38.3	561.7
4	3	First stage	1	OPN4 2	13/11/2014	600	64200 - 64800 sec	250.3	349.7
4	3	First stage	1	OPN4 2	13/11/2014	600	64800 - 65400 sec	434	166
4	3	First stage	1	OPN4 2	13/11/2014	600	65400 - 66000 sec	239.2	360.8
4	3	First stage	1	OPN4 2	13/11/2014	600	66000 - 66600 sec	34.6	565.4
4	3	First stage	1	OPN4 2	13/11/2014	600	66600 - 67200 sec	33.4	566.6
4	3	First stage	1	OPN4 2	13/11/2014	600	67200 - 67800 sec	50.6	549.4
4	3	First stage	1	OPN4 2	13/11/2014	600	67800 - 68400 sec	48.2	551.8
4	3	First stage	1	OPN4 2	13/11/2014	600	68400 - 69000 sec	6.1	593.9
4	3	First stage	1	OPN4 2	13/11/2014	600	69000 - 69600 sec	46.2	553.8
4	3	First stage	1	OPN4 2	13/11/2014	600	69600 - 70200 sec	103.2	496.8
4	3	First stage	1	OPN4 2	13/11/2014	600	70200 - 70800 sec	60.6	539.4
4	3	First stage	1	OPN4 2	13/11/2014	600	70800 - 71400 sec	48.4	551.6
4	3	First stage	1	OPN4 2	13/11/2014	600	71400 - 72000 sec	302.4	297.6
4	3	First stage	1	OPN4 2	13/11/2014	600	72000 - 72600 sec	600	0
4	3	First stage	1	OPN4 2	13/11/2014	600	72600 - 73200 sec	600	0
4	3	First stage	1	OPN4 2	13/11/2014	600	73200 - 73800 sec	600	0
4	3	First stage	1	OPN4 2	13/11/2014	600	73800 - 74400 sec	406.8	193.2
4	3	First stage	1	OPN4 2	13/11/2014	600	74400 - 75000 sec	56.3	543.7
4	3	First stage	1	OPN4 2	13/11/2014	600	75000 - 75600 sec	46.9	553.2
4	3	First stage	1	OPN4 2	13/11/2014	600	75600 - 76200 sec	43.5	556.5
4	3	First stage	1	OPN4 2	13/11/2014	600	76200 - 76800 sec	9	591
4	3	First stage	1	OPN4 2	13/11/2014	600	76800 - 77400 sec	39.9	560.1
4	3	First stage	1	OPN4 2	13/11/2014	600	77400 - 78000 sec	28.8	571.2
4	3	First stage	1	OPN4 2	13/11/2014	600	78000 - 78600 sec	116.8	483.2
4	3	First stage	1	OPN4 2	13/11/2014	600	78600 - 79200 sec	17	583
4	3	First stage	1	OPN4 2	13/11/2014	600	79200 - 79800 sec	2	598
4	3	First stage	1	OPN4 2	13/11/2014	600	79800 - 80400 sec	76.6	523.4
4	3	First stage	1	OPN4 2	13/11/2014	600	80400 - 81000 sec	385	215
4	3	First stage	1	OPN4 2	13/11/2014	600	81000 - 81600 sec	586.6	13.4
4	3	First stage	1	OPN4 2	13/11/2014	600	81600 - 82200 sec	53.8	546.2
4	3	First stage	1	OPN4 2	13/11/2014	600	82200 - 82800 sec	57.4	542.6
4	3	First stage	1	OPN4 2	13/11/2014	600	82800 - 83400 sec	583.2	16.8
4	3	First stage	1	OPN4 2	13/11/2014	600	83400 - 84000 sec	91	509
4	3	First stage	1	OPN4 2	13/11/2014	600	84000 - 84600 sec	431.6	168.4
4	3	First stage	1	OPN4 2	13/11/2014	600	84600 - 85200 sec	600	0
4	3	First stage	1	OPN4 2	13/11/2014	600	85200 - 85800 sec	549.7	50.3
4	3	First stage	1	OPN4 2	13/11/2014	600	85800 - 86400 sec	275.1	324.9
4	3	First stage	1	OPN4 2	13/11/2014	600	86400 - 87000 sec	525.3	74.7
4	3	First stage	1	OPN4 2	13/11/2014	600	87000 - 87600 sec	600	0
4	3	First stage	1	OPN4 2	13/11/2014	600	87600 - 88200 sec	600	0
4	3	First stage	1	OPN4 2	13/11/2014	600	88200 - 88800 sec	600	0
4	3	First stage	1	OPN4 2	13/11/2014	600	88800 - 89400 sec	600	0
4	3	First stage	1	OPN4 2	13/11/2014	600	89400 - 90000 sec	600	0
4	3	First stage	1	OPN4 2	13/11/2014	600	90000 - 90600 sec	600	0
4	3	First stage	1	OPN4 2	13/11/2014	600	90600 - 91200 sec	600	0
4	3	First stage	1	OPN4 2	13/11/2014	600	91200 - 91800 sec	600	0
4	3	First stage	1	OPN4 2	13/11/2014	600	91800 - 92400 sec	600	0
4	3	First stage	1	OPN4 2	13/11/2014	600	92400 - 93000 sec	600	0
4	3	First stage	1	OPN4 2	13/11/2014	600	93000 - 93600 sec	600	0
4	3	First stage	1	OPN4 2	13/11/2014	600	93600 - 94200 sec	251.3	348.7
4	3	First stage	1	OPN4 2	13/11/2014	600	94200 - 94800 sec	158.8	441.3
4	3	First stage	1	OPN4 2	13/11/2014	600	94800 - 95400 sec	116.1	483.9
4	3	First stage	1	OPN4 2	13/11/2014	600	95400 - 96000 sec	195.3	404.7
4	3	First stage	1	OPN4 2	13/11/2014	600	96000 - 96600 sec	339.4	260.6
4	3	First stage	1	OPN4 2	13/11/2014	600	96600 - 97200 sec	600	0
4	3	First stage	1	OPN4 2	13/11/2014	600	97200 - 97800 sec	600	0
4	3	First stage	1	OPN4 2	13/11/2014	600	97800 - 98400 sec	600	0
4	3	First stage	1	OPN4 2	13/11/2014	600	98400 - 99000 sec	600	0
4	3	First stage	1	OPN4 2	13/11/2014	600	99000 - 99600 sec	600	0
4	3	First stage	1	OPN4 2	13/11/2014	600	99600 - 100200 se	600	0
4	3	First stage	1	OPN4 2	13/11/2014	600	100200 - 100800 s	600	0
4	3	First stage	1	OPN4 2	13/11/2014	600	100800 - 101400 s	600	0
4	3	First stage	1	OPN4 2	13/11/2014	600	101400 - 102000 s	600	0
4	3	First stage	1	OPN4 2	13/11/2014	600	102000 - 102600 s	600	0
4	3	First stage	1	OPN4 2	13/11/2014	600	102600 - 103200 s	600	0
4	3	First stage	1	OPN4 2	13/11/2014	600	103200 - 103800 s	600	0
4	3	First stage	1	OPN4 2	13/11/2014	600	103800 - 104400 s	600	0
4	3	First stage	1	OPN4 2	13/11/2014	600	104400 - 105000 s	600	0
4	3	First stage	1	OPN4 2	13/11/2014	600	105000 - 105600 s	600	0
4	3	First stage	1	OPN4 2	13/11/2014	600	105600 - 106200 s	600	0
4	3	First stage	1	OPN4 2	13/11/2014	600	106200 - 106800 s	600	0
4	3	First stage	1	OPN4 2	13/11/2014	600	106800 - 107400 s	600	0
4	3	First stage	1	OPN4 2	13/11/2014	600	107400 - 108000 s	600	0
4	3	First stage	1	OPN4 2	13/11/2014	600	108000 - 108600 s	600	0
4	3	First stage	1	OPN4 2	13/11/2014	600	108600 - 109200 s	587.5	12.5
4	3	First stage	1	OPN4 2	13/11/2014	600	109200 - 109800 s	136.5	463.5
4	3	First stage	1	OPN4 2	13/11/2014	600	109800 - 110400 s	47.4	552.6
4	3	First stage	1	OPN4 2	13/11/2014	600	110400 - 111000 s	38.8	561.2
4	3	First stage	1	OPN4 2	13/11/2014	600	111000 - 111600 s	333.7	266.3
4	3	First stage	1	OPN4 2	13/11/2014	600	111600 - 112200 s	22.1	577.9
4	3	First stage	1	OPN4 2	13/11/2014	600	112200 - 112800 s	81	519
4	3	First stage	1	OPN4 2	13/11/2014	600	112800 - 113400 s	258.8	341.3
4	3	First stage	1	OPN4 2	13/11/2014	600	113400 - 114000 s	600	0
4	3	First stage	1	OPN4 2	13/11/2014	600	114000 - 114600 s	600	0
4	3	First stage	1	OPN4 2	13/11/2014	600	114600 - 115200 s	600	0
4	3	First stage	1	OPN4 2	13/11/2014	600	115200 - 115800 s	600	0
4	3	First stage	1	OPN4 2	13/11/2014	600	115800 - 116400 s	600	0
4	3	First stage	1	OPN4 2	13/11/2014	600	116400 - 117000 s	600	0
4	3	First stage	1	OPN4 2	13/11/2014	600	117000 - 117600 s	600	0
4	3	First stage	1	OPN4 2	13/11/2014	600	117600 - 118200 s	600	0
4	3	First stage	1	OPN4 2	13/11/2014	600	118200 - 118800 s	600	0
4	3	First stage	1	OPN4 2	13/11/2014	600	118800 - 119400 s	600	0
4	3	First stage	1	OPN4 2	13/11/2014	600	119400 - 120000 s	600	0
4	3	First stage	1	OPN4 2	13/11/2014	600	120000 - 120600 s	145.1	454.9
4	3	First stage	1	OPN4 2	13/11/2014	600	120600 - 121200 s	119.7	480.3
4	3	First stage	1	OPN4 2	13/11/2014	600	121200 - 121800 s	2	598
4	3	First stage	1	OPN4 2	13/11/2014	600	121800 - 122400 s	32	568
4	3	First stage	1	OPN4 2	13/11/2014	600	122400 - 123000 s	2	598
4	3	First stage	1	OPN4 2	13/11/2014	600	123000 - 123600 s	124.3	475.7
4	3	First stage	1	OPN4 2	13/11/2014	600	123600 - 124200 s	171.6	428.4
4	3	First stage	1	OPN4 2	13/11/2014	600	124200 - 124800 s	24.6	575.4
4	3	First stage	1	OPN4 2	13/11/2014	600	124800 - 125400 s	91.9	508.1
4	3	First stage	1	OPN4 2	13/11/2014	600	125400 - 126000 s	279.8	320.2
4	3	First stage	1	OPN4 2	13/11/2014	600	126000 - 126600 s	600	0
4	3	First stage	1	OPN4 2	13/11/2014	600	126600 - 127200 s	600	0
4	3	First stage	1	OPN4 2	13/11/2014	600	127200 - 127800 s	600	0
4	3	First stage	1	OPN4 2	13/11/2014	600	127800 - 128400 s	600	0
4	3	First stage	1	OPN4 2	13/11/2014	600	128400 - 129000 s	600	0
4	3	First stage	1	OPN4 2	13/11/2014	600	129000 - 129600 s	600	0
4	3	First stage	1	OPN4 2	13/11/2014	600	129600 - 130200 s	600	0
4	3	First stage	1	OPN4 2	13/11/2014	600	130200 - 130800 s	242.4	357.6
4	3	First stage	1	OPN4 2	13/11/2014	600	130800 - 131400 s	51.8	548.2
4	3	First stage	1	OPN4 2	13/11/2014	600	131400 - 132000 s	43.4	556.6
4	3	First stage	1	OPN4 2	13/11/2014	600	132000 - 132600 s	37.6	562.4
4	3	First stage	1	OPN4 2	13/11/2014	600	132600 - 133200 s	36.5	563.5
4	3	First stage	1	OPN4 2	13/11/2014	600	133200 - 133800 s	31.6	568.4
4	3	First stage	1	OPN4 2	13/11/2014	600	133800 - 134400 s	48.8	551.2
4	3	First stage	1	OPN4 2	13/11/2014	600	134400 - 135000 s	155.5	444.5
4	3	First stage	1	OPN4 2	13/11/2014	600	135000 - 135600 s	600	0
4	3	First stage	1	OPN4 2	13/11/2014	600	135600 - 136200 s	600	0
4	3	First stage	1	OPN4 2	13/11/2014	600	136200 - 136800 s	600	0
4	3	First stage	1	OPN4 2	13/11/2014	600	136800 - 137400 s	600	0
4	3	First stage	1	OPN4 2	13/11/2014	600	137400 - 138000 s	342	258
4	3	First stage	1	OPN4 2	13/11/2014	600	138000 - 138600 s	53.7	546.3
4	3	First stage	1	OPN4 2	13/11/2014	600	138600 - 139200 s	35.8	564.2
4	3	First stage	1	OPN4 2	13/11/2014	600	139200 - 139800 s	67.1	532.9
4	3	First stage	1	OPN4 2	13/11/2014	600	139800 - 140400 s	45.4	554.6
4	3	First stage	1	OPN4 2	13/11/2014	600	140400 - 141000 s	3	597
4	3	First stage	1	OPN4 2	13/11/2014	600	141000 - 141600 s	21.3	578.7
4	3	First stage	1	OPN4 2	13/11/2014	600	141600 - 142200 s	31.9	568.1
4	3	First stage	1	OPN4 2	13/11/2014	600	142200 - 142800 s	43.8	556.2
4	3	First stage	1	OPN4 2	13/11/2014	600	142800 - 143400 s	7.2	592.8
4	3	First stage	1	OPN4 2	13/11/2014	600	143400 - 144000 s	1	599
4	3	First stage	1	OPN4 2	13/11/2014	600	144000 - 144600 s	231.2	368.8
4	3	First stage	1	OPN4 2	13/11/2014	600	144600 - 145200 s	440.9	159.1
4	3	First stage	1	OPN4 2	13/11/2014	600	145200 - 145800 s	78.5	521.5
4	3	First stage	1	OPN4 2	13/11/2014	600	145800 - 146400 s	3	597
4	3	First stage	1	OPN4 2	13/11/2014	600	146400 - 147000 s	69.8	530.2
4	3	First stage	1	OPN4 2	13/11/2014	600	147000 - 147600 s	27.8	572.2
4	3	First stage	1	OPN4 2	13/11/2014	600	147600 - 148200 s	33	567
4	3	First stage	1	OPN4 2	13/11/2014	600	148200 - 148800 s	54.1	545.9
4	3	First stage	1	OPN4 2	13/11/2014	600	148800 - 149400 s	20.5	579.5
4	3	First stage	1	OPN4 2	13/11/2014	600	149400 - 150000 s	39.9	560.1
4	3	First stage	1	OPN4 2	13/11/2014	600	150000 - 150600 s	32.4	567.6
4	3	First stage	1	OPN4 2	13/11/2014	600	150600 - 151200 s	8	592
4	3	First stage	1	OPN4 2	13/11/2014	600	151200 - 151800 s	527.2	72.8
4	3	First stage	1	OPN4 2	13/11/2014	600	151800 - 152400 s	600	0
4	3	First stage	1	OPN4 2	13/11/2014	600	152400 - 153000 s	600	0
4	3	First stage	1	OPN4 2	13/11/2014	600	153000 - 153600 s	443.1	156.9
4	3	First stage	1	OPN4 2	13/11/2014	600	153600 - 154200 s	493.4	106.6
4	3	First stage	1	OPN4 2	13/11/2014	600	154200 - 154800 s	6.3	593.7
4	3	First stage	1	OPN4 2	13/11/2014	600	154800 - 155400 s	6.1	593.9
4	3	First stage	1	OPN4 2	13/11/2014	600	155400 - 156000 s	41	559
4	3	First stage	1	OPN4 2	13/11/2014	600	156000 - 156600 s	11.3	588.7
4	3	First stage	1	OPN4 2	13/11/2014	600	156600 - 157200 s	80.9	519.1
4	3	First stage	1	OPN4 2	13/11/2014	600	157200 - 157800 s	24.3	575.7
4	3	First stage	1	OPN4 2	13/11/2014	600	157800 - 158400 s	135.9	464.1
4	3	First stage	1	OPN4 2	13/11/2014	600	158400 - 159000 s	1	599
4	3	First stage	1	OPN4 2	13/11/2014	600	159000 - 159600 s	45.1	554.9
4	3	First stage	1	OPN4 2	13/11/2014	600	159600 - 160200 s	51.6	548.4
4	3	First stage	1	OPN4 2	13/11/2014	600	160200 - 160800 s	106.7	493.3
4	3	First stage	1	OPN4 2	13/11/2014	600	160800 - 161400 s	30.2	569.8
4	3	First stage	1	OPN4 2	13/11/2014	600	161400 - 162000 s	265.2	334.8
4	3	First stage	1	OPN4 2	13/11/2014	600	162000 - 162600 s	600	0
4	3	First stage	1	OPN4 2	13/11/2014	600	162600 - 163200 s	23.4	576.6
4	3	First stage	1	OPN4 2	13/11/2014	600	163200 - 163800 s	156.7	443.3
4	3	First stage	1	OPN4 2	13/11/2014	600	163800 - 164400 s	41.6	558.4
4	3	First stage	1	OPN4 2	13/11/2014	600	164400 - 165000 s	58.8	541.2
4	3	First stage	1	OPN4 2	13/11/2014	600	165000 - 165600 s	18.2	581.8
4	3	First stage	1	OPN4 2	13/11/2014	600	165600 - 166200 s	68.3	531.8
4	3	First stage	1	OPN4 2	13/11/2014	600	166200 - 166800 s	122.4	477.6
4	3	First stage	1	OPN4 2	13/11/2014	600	166800 - 167400 s	21.2	578.8
4	3	First stage	1	OPN4 2	13/11/2014	600	167400 - 168000 s	37.4	562.6
4	3	First stage	1	OPN4 2	13/11/2014	600	168000 - 168600 s	272.6	327.4
4	3	First stage	1	OPN4 2	13/11/2014	600	168600 - 169200 s	600	0
4	3	First stage	1	OPN4 2	13/11/2014	600	169200 - 169800 s	275.5	324.6
4	3	First stage	1	OPN4 2	13/11/2014	600	169800 - 170400 s	73.2	526.8
4	3	First stage	1	OPN4 2	13/11/2014	600	170400 - 171000 s	26.7	573.4
4	3	First stage	1	OPN4 2	13/11/2014	600	171000 - 171600 s	576.7	23.3
4	3	First stage	1	OPN4 2	13/11/2014	600	171600 - 172200 s	498.2	101.8
4	3	First stage	1	OPN4 2	13/11/2014	600	172200 - 172800 s	64.8	535.2
4	3	First stage	1	OPN4 2	13/11/2014	600	172800 - 173400 s	354.6	245.4
4	3	First stage	1	OPN4 2	13/11/2014	600	173400 - 174000 s	600	0
4	3	First stage	1	OPN4 2	13/11/2014	600	174000 - 174600 s	551.8	48.2
4	3	First stage	1	OPN4 2	13/11/2014	600	174600 - 175200 s	427.4	172.6
4	3	First stage	1	OPN4 2	13/11/2014	600	175200 - 175800 s	559.9	40.1
4	3	First stage	1	OPN4 2	13/11/2014	600	175800 - 176400 s	600	0
4	3	First stage	1	OPN4 2	13/11/2014	600	176400 - 177000 s	535.2	64.8
4	3	First stage	1	OPN4 2	13/11/2014	600	177000 - 177600 s	600	0
4	3	First stage	1	OPN4 2	13/11/2014	600	177600 - 178200 s	600	0
4	3	First stage	1	OPN4 2	13/11/2014	600	178200 - 178800 s	600	0
4	3	First stage	1	OPN4 2	13/11/2014	600	178800 - 179400 s	600	0
4	3	First stage	1	OPN4 2	13/11/2014	600	179400 - 180000 s	600	0
4	3	First stage	1	OPN4 2	13/11/2014	600	180000 - 180600 s	600	0
4	3	First stage	1	OPN4 2	13/11/2014	600	180600 - 181200 s	600	0
4	3	First stage	1	OPN4 2	13/11/2014	600	181200 - 181800 s	600	0
4	3	First stage	1	OPN4 2	13/11/2014	600	181800 - 182400 s	600	0
4	3	First stage	1	OPN4 2	13/11/2014	600	182400 - 183000 s	600	0
4	3	First stage	1	OPN4 2	13/11/2014	600	183000 - 183600 s	600	0
4	3	First stage	1	OPN4 2	13/11/2014	600	183600 - 184200 s	600	0
4	3	First stage	1	OPN4 2	13/11/2014	600	184200 - 184800 s	600	0
4	3	First stage	1	OPN4 2	13/11/2014	600	184800 - 185400 s	600	0
4	3	First stage	1	OPN4 2	13/11/2014	600	185400 - 186000 s	600	0
4	3	First stage	1	OPN4 2	13/11/2014	600	186000 - 186600 s	553.1	46.9
4	3	First stage	1	OPN4 2	13/11/2014	600	186600 - 187200 s	600	0
4	3	First stage	1	OPN4 2	13/11/2014	600	187200 - 187800 s	600	0
4	3	First stage	1	OPN4 2	13/11/2014	600	187800 - 188400 s	600	0
4	3	First stage	1	OPN4 2	13/11/2014	600	188400 - 189000 s	382.5	217.5
4	3	First stage	1	OPN4 2	13/11/2014	600	189000 - 189600 s	69.1	530.9
4	3	First stage	1	OPN4 2	13/11/2014	600	189600 - 190200 s	142	458
4	3	First stage	1	OPN4 2	13/11/2014	600	190200 - 190800 s	46.6	553.4
4	3	First stage	1	OPN4 2	13/11/2014	600	190800 - 191400 s	143.7	456.3
4	3	First stage	1	OPN4 2	13/11/2014	600	191400 - 192000 s	309.3	290.7
4	3	First stage	1	OPN4 2	13/11/2014	600	192000 - 192600 s	82.9	517.1
4	3	First stage	1	OPN4 2	13/11/2014	600	192600 - 193200 s	70.1	529.9
4	3	First stage	1	OPN4 2	13/11/2014	600	193200 - 193800 s	463.1	136.9
4	3	First stage	1	OPN4 2	13/11/2014	600	193800 - 194400 s	600	0
4	3	First stage	1	OPN4 2	13/11/2014	600	194400 - 195000 s	600	0
4	3	First stage	1	OPN4 2	13/11/2014	600	195000 - 195600 s	600	0
4	3	First stage	1	OPN4 2	13/11/2014	600	195600 - 196200 s	600	0
4	3	First stage	1	OPN4 2	13/11/2014	600	196200 - 196800 s	244.3	355.7
4	3	First stage	1	OPN4 2	13/11/2014	600	196800 - 197400 s	44.2	555.8
4	3	First stage	1	OPN4 2	13/11/2014	600	197400 - 198000 s	49.7	550.3
4	3	First stage	1	OPN4 2	13/11/2014	600	198000 - 198600 s	117.3	482.7
4	3	First stage	1	OPN4 2	13/11/2014	600	198600 - 199200 s	61.4	538.6
4	3	First stage	1	OPN4 2	13/11/2014	600	199200 - 199800 s	109.7	490.3
4	3	First stage	1	OPN4 2	13/11/2014	600	199800 - 200400 s	542.5	57.5
4	3	First stage	1	OPN4 2	13/11/2014	600	200400 - 201000 s	600	0
4	3	First stage	1	OPN4 2	13/11/2014	600	201000 - 201600 s	600	0
4	3	First stage	1	OPN4 2	13/11/2014	600	201600 - 202200 s	600	0
4	3	First stage	1	OPN4 2	13/11/2014	600	202200 - 202800 s	600	0
4	3	First stage	1	OPN4 2	13/11/2014	600	202800 - 203400 s	600	0
4	3	First stage	1	OPN4 2	13/11/2014	600	203400 - 204000 s	600	0
4	3	First stage	1	OPN4 2	13/11/2014	600	204000 - 204600 s	600	0
4	3	First stage	1	OPN4 2	13/11/2014	600	204600 - 205200 s	600	0
4	3	First stage	1	OPN4 2	13/11/2014	600	205200 - 205800 s	187.5	412.5
4	3	First stage	1	OPN4 2	13/11/2014	600	205800 - 206400 s	32.5	567.5
4	3	First stage	1	OPN4 2	13/11/2014	600	206400 - 207000 s	114.3	485.7
4	3	First stage	1	OPN4 2	13/11/2014	600	207000 - 207600 s	27.2	572.8
4	3	First stage	1	OPN4 2	13/11/2014	600	207600 - 208200 s	65.8	534.2
4	3	First stage	1	OPN4 2	13/11/2014	600	208200 - 208800 s	30.5	569.5
4	3	First stage	1	OPN4 2	13/11/2014	600	208800 - 209400 s	50.3	549.7
4	3	First stage	1	OPN4 2	13/11/2014	600	209400 - 210000 s	291	309
4	3	First stage	1	OPN4 2	13/11/2014	600	210000 - 210600 s	143.2	456.8
4	3	First stage	1	OPN4 2	13/11/2014	600	210600 - 211200 s	157.7	442.4
4	3	First stage	1	OPN4 2	13/11/2014	600	211200 - 211800 s	600	0
4	3	First stage	1	OPN4 2	13/11/2014	600	211800 - 212400 s	600	0
4	3	First stage	1	OPN4 2	13/11/2014	600	212400 - 213000 s	600	0
4	3	First stage	1	OPN4 2	13/11/2014	600	213000 - 213600 s	600	0
4	3	First stage	1	OPN4 2	13/11/2014	600	213600 - 214200 s	600	0
4	3	First stage	1	OPN4 2	13/11/2014	600	214200 - 214800 s	600	0
4	3	First stage	1	OPN4 2	13/11/2014	600	214800 - 215400 s	600	0
4	3	First stage	1	OPN4 2	13/11/2014	600	215400 - 216000 s	600	0
6	9	First stage	1	OPN4 5	09/12/2014	600	0 - 600 secs.	494.3	105.8
6	9	First stage	1	OPN4 5	09/12/2014	600	600 - 1200 secs.	376.7	223.3
6	9	First stage	1	OPN4 5	09/12/2014	600	1200 - 1800 secs.	600	0
6	9	First stage	1	OPN4 5	09/12/2014	600	1800 - 2400 secs.	600	0
6	9	First stage	1	OPN4 5	09/12/2014	600	2400 - 3000 secs.	600	0
6	9	First stage	1	OPN4 5	09/12/2014	600	3000 - 3600 secs.	600	0
6	9	First stage	1	OPN4 5	09/12/2014	600	3600 - 4200 secs.	600	0
6	9	First stage	1	OPN4 5	09/12/2014	600	4200 - 4800 secs.	600	0
6	9	First stage	1	OPN4 5	09/12/2014	600	4800 - 5400 secs.	600	0
6	9	First stage	1	OPN4 5	09/12/2014	600	5400 - 6000 secs.	600	0
6	9	First stage	1	OPN4 5	09/12/2014	600	6000 - 6600 secs.	545.9	54.2
6	9	First stage	1	OPN4 5	09/12/2014	600	6600 - 7200 secs.	106.3	493.7
6	9	First stage	1	OPN4 5	09/12/2014	600	7200 - 7800 secs.	43.3	556.7
6	9	First stage	1	OPN4 5	09/12/2014	600	7800 - 8400 secs.	290.6	309.4
6	9	First stage	1	OPN4 5	09/12/2014	600	8400 - 9000 secs.	600	0
6	9	First stage	1	OPN4 5	09/12/2014	600	9000 - 9600 secs.	600	0
6	9	First stage	1	OPN4 5	09/12/2014	600	9600 - 10200 secs	600	0
6	9	First stage	1	OPN4 5	09/12/2014	600	10200 - 10800 sec	585.6	14.4
6	9	First stage	1	OPN4 5	09/12/2014	600	10800 - 11400 sec	547.7	52.3
6	9	First stage	1	OPN4 5	09/12/2014	600	11400 - 12000 sec	553.8	46.2
6	9	First stage	1	OPN4 5	09/12/2014	600	12000 - 12600 sec	600	0
6	9	First stage	1	OPN4 5	09/12/2014	600	12600 - 13200 sec	600	0
6	9	First stage	1	OPN4 5	09/12/2014	600	13200 - 13800 sec	600	0
6	9	First stage	1	OPN4 5	09/12/2014	600	13800 - 14400 sec	600	0
6	9	First stage	1	OPN4 5	09/12/2014	600	14400 - 15000 sec	600	0
6	9	First stage	1	OPN4 5	09/12/2014	600	15000 - 15600 sec	523.3	76.7
6	9	First stage	1	OPN4 5	09/12/2014	600	15600 - 16200 sec	600	0
6	9	First stage	1	OPN4 5	09/12/2014	600	16200 - 16800 sec	600	0
6	9	First stage	1	OPN4 5	09/12/2014	600	16800 - 17400 sec	600	0
6	9	First stage	1	OPN4 5	09/12/2014	600	17400 - 18000 sec	600	0
6	9	First stage	1	OPN4 5	09/12/2014	600	18000 - 18600 sec	407.9	192.1
6	9	First stage	1	OPN4 5	09/12/2014	600	18600 - 19200 sec	88.4	511.6
6	9	First stage	1	OPN4 5	09/12/2014	600	19200 - 19800 sec	338.3	261.7
6	9	First stage	1	OPN4 5	09/12/2014	600	19800 - 20400 sec	600	0
6	9	First stage	1	OPN4 5	09/12/2014	600	20400 - 21000 sec	600	0
6	9	First stage	1	OPN4 5	09/12/2014	600	21000 - 21600 sec	600	0
6	9	First stage	1	OPN4 5	09/12/2014	600	21600 - 22200 sec	600	0
6	9	First stage	1	OPN4 5	09/12/2014	600	22200 - 22800 sec	552.8	47.2
6	9	First stage	1	OPN4 5	09/12/2014	600	22800 - 23400 sec	600	0
6	9	First stage	1	OPN4 5	09/12/2014	600	23400 - 24000 sec	600	0
6	9	First stage	1	OPN4 5	09/12/2014	600	24000 - 24600 sec	600	0
6	9	First stage	1	OPN4 5	09/12/2014	600	24600 - 25200 sec	600	0
6	9	First stage	1	OPN4 5	09/12/2014	600	25200 - 25800 sec	600	0
6	9	First stage	1	OPN4 5	09/12/2014	600	25800 - 26400 sec	600	0
6	9	First stage	1	OPN4 5	09/12/2014	600	26400 - 27000 sec	600	0
6	9	First stage	1	OPN4 5	09/12/2014	600	27000 - 27600 sec	600	0
6	9	First stage	1	OPN4 5	09/12/2014	600	27600 - 28200 sec	600	0
6	9	First stage	1	OPN4 5	09/12/2014	600	28200 - 28800 sec	600	0
6	9	First stage	1	OPN4 5	09/12/2014	600	28800 - 29400 sec	214.7	385.3
6	9	First stage	1	OPN4 5	09/12/2014	600	29400 - 30000 sec	14.7	585.3
6	9	First stage	1	OPN4 5	09/12/2014	600	30000 - 30600 sec	14	586
6	9	First stage	1	OPN4 5	09/12/2014	600	30600 - 31200 sec	0	600
6	9	First stage	1	OPN4 5	09/12/2014	600	31200 - 31800 sec	0	600
6	9	First stage	1	OPN4 5	09/12/2014	600	31800 - 32400 sec	8	592
6	9	First stage	1	OPN4 5	09/12/2014	600	32400 - 33000 sec	0	600
6	9	First stage	1	OPN4 5	09/12/2014	600	33000 - 33600 sec	381.2	218.8
6	9	First stage	1	OPN4 5	09/12/2014	600	33600 - 34200 sec	600	0
6	9	First stage	1	OPN4 5	09/12/2014	600	34200 - 34800 sec	600	0
6	9	First stage	1	OPN4 5	09/12/2014	600	34800 - 35400 sec	600	0
6	9	First stage	1	OPN4 5	09/12/2014	600	35400 - 36000 sec	600	0
6	9	First stage	1	OPN4 5	09/12/2014	600	36000 - 36600 sec	600	0
6	9	First stage	1	OPN4 5	09/12/2014	600	36600 - 37200 sec	548	52
6	9	First stage	1	OPN4 5	09/12/2014	600	37200 - 37800 sec	600	0
6	9	First stage	1	OPN4 5	09/12/2014	600	37800 - 38400 sec	600	0
6	9	First stage	1	OPN4 5	09/12/2014	600	38400 - 39000 sec	600	0
6	9	First stage	1	OPN4 5	09/12/2014	600	39000 - 39600 sec	600	0
6	9	First stage	1	OPN4 5	09/12/2014	600	39600 - 40200 sec	510	90
6	9	First stage	1	OPN4 5	09/12/2014	600	40200 - 40800 sec	45.4	554.6
6	9	First stage	1	OPN4 5	09/12/2014	600	40800 - 41400 sec	21.4	578.6
6	9	First stage	1	OPN4 5	09/12/2014	600	41400 - 42000 sec	13.1	586.9
6	9	First stage	1	OPN4 5	09/12/2014	600	42000 - 42600 sec	589.4	10.6
6	9	First stage	1	OPN4 5	09/12/2014	600	42600 - 43200 sec	600	0
6	9	First stage	1	OPN4 5	09/12/2014	600	43200 - 43800 sec	600	0
6	9	First stage	1	OPN4 5	09/12/2014	600	43800 - 44400 sec	505.8	94.2
6	9	First stage	1	OPN4 5	09/12/2014	600	44400 - 45000 sec	47.8	552.2
6	9	First stage	1	OPN4 5	09/12/2014	600	45000 - 45600 sec	31.2	568.8
6	9	First stage	1	OPN4 5	09/12/2014	600	45600 - 46200 sec	37.2	562.8
6	9	First stage	1	OPN4 5	09/12/2014	600	46200 - 46800 sec	0	600
6	9	First stage	1	OPN4 5	09/12/2014	600	46800 - 47400 sec	0	600
6	9	First stage	1	OPN4 5	09/12/2014	600	47400 - 48000 sec	0	600
6	9	First stage	1	OPN4 5	09/12/2014	600	48000 - 48600 sec	2	598
6	9	First stage	1	OPN4 5	09/12/2014	600	48600 - 49200 sec	0	600
6	9	First stage	1	OPN4 5	09/12/2014	600	49200 - 49800 sec	0	600
6	9	First stage	1	OPN4 5	09/12/2014	600	49800 - 50400 sec	0	600
6	9	First stage	1	OPN4 5	09/12/2014	600	50400 - 51000 sec	221.5	378.5
6	9	First stage	1	OPN4 5	09/12/2014	600	51000 - 51600 sec	145.1	454.9
6	9	First stage	1	OPN4 5	09/12/2014	600	51600 - 52200 sec	3	597
6	9	First stage	1	OPN4 5	09/12/2014	600	52200 - 52800 sec	3.1	596.9
6	9	First stage	1	OPN4 5	09/12/2014	600	52800 - 53400 sec	1	599
6	9	First stage	1	OPN4 5	09/12/2014	600	53400 - 54000 sec	1	599
6	9	First stage	1	OPN4 5	09/12/2014	600	54000 - 54600 sec	11	589
6	9	First stage	1	OPN4 5	09/12/2014	600	54600 - 55200 sec	7	593
6	9	First stage	1	OPN4 5	09/12/2014	600	55200 - 55800 sec	33.4	566.6
6	9	First stage	1	OPN4 5	09/12/2014	600	55800 - 56400 sec	41.4	558.6
6	9	First stage	1	OPN4 5	09/12/2014	600	56400 - 57000 sec	1	599
6	9	First stage	1	OPN4 5	09/12/2014	600	57000 - 57600 sec	1	599
6	9	First stage	1	OPN4 5	09/12/2014	600	57600 - 58200 sec	241.7	358.3
6	9	First stage	1	OPN4 5	09/12/2014	600	58200 - 58800 sec	539.5	60.5
6	9	First stage	1	OPN4 5	09/12/2014	600	58800 - 59400 sec	193	407
6	9	First stage	1	OPN4 5	09/12/2014	600	59400 - 60000 sec	0	600
6	9	First stage	1	OPN4 5	09/12/2014	600	60000 - 60600 sec	6	594
6	9	First stage	1	OPN4 5	09/12/2014	600	60600 - 61200 sec	19.1	580.9
6	9	First stage	1	OPN4 5	09/12/2014	600	61200 - 61800 sec	0	600
6	9	First stage	1	OPN4 5	09/12/2014	600	61800 - 62400 sec	0	600
6	9	First stage	1	OPN4 5	09/12/2014	600	62400 - 63000 sec	1	599
6	9	First stage	1	OPN4 5	09/12/2014	600	63000 - 63600 sec	53.9	546.1
6	9	First stage	1	OPN4 5	09/12/2014	600	63600 - 64200 sec	3	597
6	9	First stage	1	OPN4 5	09/12/2014	600	64200 - 64800 sec	0	600
6	9	First stage	1	OPN4 5	09/12/2014	600	64800 - 65400 sec	86.8	513.2
6	9	First stage	1	OPN4 5	09/12/2014	600	65400 - 66000 sec	121.1	478.9
6	9	First stage	1	OPN4 5	09/12/2014	600	66000 - 66600 sec	29.6	570.4
6	9	First stage	1	OPN4 5	09/12/2014	600	66600 - 67200 sec	42.2	557.8
6	9	First stage	1	OPN4 5	09/12/2014	600	67200 - 67800 sec	12.3	587.7
6	9	First stage	1	OPN4 5	09/12/2014	600	67800 - 68400 sec	54.5	545.5
6	9	First stage	1	OPN4 5	09/12/2014	600	68400 - 69000 sec	528.6	71.4
6	9	First stage	1	OPN4 5	09/12/2014	600	69000 - 69600 sec	448.8	151.2
6	9	First stage	1	OPN4 5	09/12/2014	600	69600 - 70200 sec	509.6	90.4
6	9	First stage	1	OPN4 5	09/12/2014	600	70200 - 70800 sec	223.5	376.5
6	9	First stage	1	OPN4 5	09/12/2014	600	70800 - 71400 sec	4	596
6	9	First stage	1	OPN4 5	09/12/2014	600	71400 - 72000 sec	100	500
6	9	First stage	1	OPN4 5	09/12/2014	600	72000 - 72600 sec	0	600
6	9	First stage	1	OPN4 5	09/12/2014	600	72600 - 73200 sec	4.1	595.9
6	9	First stage	1	OPN4 5	09/12/2014	600	73200 - 73800 sec	8.4	591.6
6	9	First stage	1	OPN4 5	09/12/2014	600	73800 - 74400 sec	4	596
6	9	First stage	1	OPN4 5	09/12/2014	600	74400 - 75000 sec	15.1	584.9
6	9	First stage	1	OPN4 5	09/12/2014	600	75000 - 75600 sec	42.4	557.6
6	9	First stage	1	OPN4 5	09/12/2014	600	75600 - 76200 sec	28.6	571.4
6	9	First stage	1	OPN4 5	09/12/2014	600	76200 - 76800 sec	22.6	577.4
6	9	First stage	1	OPN4 5	09/12/2014	600	76800 - 77400 sec	113.1	486.9
6	9	First stage	1	OPN4 5	09/12/2014	600	77400 - 78000 sec	96.3	503.7
6	9	First stage	1	OPN4 5	09/12/2014	600	78000 - 78600 sec	194.8	405.2
6	9	First stage	1	OPN4 5	09/12/2014	600	78600 - 79200 sec	434.8	165.2
6	9	First stage	1	OPN4 5	09/12/2014	600	79200 - 79800 sec	12.2	587.8
6	9	First stage	1	OPN4 5	09/12/2014	600	79800 - 80400 sec	65.8	534.2
6	9	First stage	1	OPN4 5	09/12/2014	600	80400 - 81000 sec	35.3	564.7
6	9	First stage	1	OPN4 5	09/12/2014	600	81000 - 81600 sec	117.7	482.3
6	9	First stage	1	OPN4 5	09/12/2014	600	81600 - 82200 sec	136	464
6	9	First stage	1	OPN4 5	09/12/2014	600	82200 - 82800 sec	600	0
6	9	First stage	1	OPN4 5	09/12/2014	600	82800 - 83400 sec	600	0
6	9	First stage	1	OPN4 5	09/12/2014	600	83400 - 84000 sec	177.9	422.1
6	9	First stage	1	OPN4 5	09/12/2014	600	84000 - 84600 sec	97.6	502.4
6	9	First stage	1	OPN4 5	09/12/2014	600	84600 - 85200 sec	332.5	267.5
6	9	First stage	1	OPN4 5	09/12/2014	600	85200 - 85800 sec	444.3	155.7
6	9	First stage	1	OPN4 5	09/12/2014	600	85800 - 86400 sec	292.6	307.5
6	9	First stage	1	OPN4 5	09/12/2014	600	86400 - 87000 sec	199.3	400.7
6	9	First stage	1	OPN4 5	09/12/2014	600	87000 - 87600 sec	456.7	143.3
6	9	First stage	1	OPN4 5	09/12/2014	600	87600 - 88200 sec	553.6	46.4
6	9	First stage	1	OPN4 5	09/12/2014	600	88200 - 88800 sec	600	0
6	9	First stage	1	OPN4 5	09/12/2014	600	88800 - 89400 sec	600	0
6	9	First stage	1	OPN4 5	09/12/2014	600	89400 - 90000 sec	600	0
6	9	First stage	1	OPN4 5	09/12/2014	600	90000 - 90600 sec	600	0
6	9	First stage	1	OPN4 5	09/12/2014	600	90600 - 91200 sec	600	0
6	9	First stage	1	OPN4 5	09/12/2014	600	91200 - 91800 sec	600	0
6	9	First stage	1	OPN4 5	09/12/2014	600	91800 - 92400 sec	600	0
6	9	First stage	1	OPN4 5	09/12/2014	600	92400 - 93000 sec	198.4	401.6
6	9	First stage	1	OPN4 5	09/12/2014	600	93000 - 93600 sec	600	0
6	9	First stage	1	OPN4 5	09/12/2014	600	93600 - 94200 sec	222.5	377.5
6	9	First stage	1	OPN4 5	09/12/2014	600	94200 - 94800 sec	45.5	554.5
6	9	First stage	1	OPN4 5	09/12/2014	600	94800 - 95400 sec	105.9	494.1
6	9	First stage	1	OPN4 5	09/12/2014	600	95400 - 96000 sec	168.2	431.8
6	9	First stage	1	OPN4 5	09/12/2014	600	96000 - 96600 sec	1	599
6	9	First stage	1	OPN4 5	09/12/2014	600	96600 - 97200 sec	292.3	307.7
6	9	First stage	1	OPN4 5	09/12/2014	600	97200 - 97800 sec	600	0
6	9	First stage	1	OPN4 5	09/12/2014	600	97800 - 98400 sec	600	0
6	9	First stage	1	OPN4 5	09/12/2014	600	98400 - 99000 sec	600	0
6	9	First stage	1	OPN4 5	09/12/2014	600	99000 - 99600 sec	600	0
6	9	First stage	1	OPN4 5	09/12/2014	600	99600 - 100200 se	600	0
6	9	First stage	1	OPN4 5	09/12/2014	600	100200 - 100800 s	600	0
6	9	First stage	1	OPN4 5	09/12/2014	600	100800 - 101400 s	600	0
6	9	First stage	1	OPN4 5	09/12/2014	600	101400 - 102000 s	600	0
6	9	First stage	1	OPN4 5	09/12/2014	600	102000 - 102600 s	600	0
6	9	First stage	1	OPN4 5	09/12/2014	600	102600 - 103200 s	600	0
6	9	First stage	1	OPN4 5	09/12/2014	600	103200 - 103800 s	600	0
6	9	First stage	1	OPN4 5	09/12/2014	600	103800 - 104400 s	600	0
6	9	First stage	1	OPN4 5	09/12/2014	600	104400 - 105000 s	600	0
6	9	First stage	1	OPN4 5	09/12/2014	600	105000 - 105600 s	600	0
6	9	First stage	1	OPN4 5	09/12/2014	600	105600 - 106200 s	600	0
6	9	First stage	1	OPN4 5	09/12/2014	600	106200 - 106800 s	268	332
6	9	First stage	1	OPN4 5	09/12/2014	600	106800 - 107400 s	345.4	254.6
6	9	First stage	1	OPN4 5	09/12/2014	600	107400 - 108000 s	600	0
6	9	First stage	1	OPN4 5	09/12/2014	600	108000 - 108600 s	422.2	177.8
6	9	First stage	1	OPN4 5	09/12/2014	600	108600 - 109200 s	600	0
6	9	First stage	1	OPN4 5	09/12/2014	600	109200 - 109800 s	542.5	57.5
6	9	First stage	1	OPN4 5	09/12/2014	600	109800 - 110400 s	402.8	197.2
6	9	First stage	1	OPN4 5	09/12/2014	600	110400 - 111000 s	543.7	56.3
6	9	First stage	1	OPN4 5	09/12/2014	600	111000 - 111600 s	600	0
6	9	First stage	1	OPN4 5	09/12/2014	600	111600 - 112200 s	600	0
6	9	First stage	1	OPN4 5	09/12/2014	600	112200 - 112800 s	600	0
6	9	First stage	1	OPN4 5	09/12/2014	600	112800 - 113400 s	600	0
6	9	First stage	1	OPN4 5	09/12/2014	600	113400 - 114000 s	600	0
6	9	First stage	1	OPN4 5	09/12/2014	600	114000 - 114600 s	533.2	66.8
6	9	First stage	1	OPN4 5	09/12/2014	600	114600 - 115200 s	67.2	532.8
6	9	First stage	1	OPN4 5	09/12/2014	600	115200 - 115800 s	33.1	566.9
6	9	First stage	1	OPN4 5	09/12/2014	600	115800 - 116400 s	478.6	121.4
6	9	First stage	1	OPN4 5	09/12/2014	600	116400 - 117000 s	600	0
6	9	First stage	1	OPN4 5	09/12/2014	600	117000 - 117600 s	600	0
6	9	First stage	1	OPN4 5	09/12/2014	600	117600 - 118200 s	600	0
6	9	First stage	1	OPN4 5	09/12/2014	600	118200 - 118800 s	600	0
6	9	First stage	1	OPN4 5	09/12/2014	600	118800 - 119400 s	488.1	111.9
6	9	First stage	1	OPN4 5	09/12/2014	600	119400 - 120000 s	417.7	182.3
6	9	First stage	1	OPN4 5	09/12/2014	600	120000 - 120600 s	71.2	528.8
6	9	First stage	1	OPN4 5	09/12/2014	600	120600 - 121200 s	0	600
6	9	First stage	1	OPN4 5	09/12/2014	600	121200 - 121800 s	6	594
6	9	First stage	1	OPN4 5	09/12/2014	600	121800 - 122400 s	1	599
6	9	First stage	1	OPN4 5	09/12/2014	600	122400 - 123000 s	25.1	574.9
6	9	First stage	1	OPN4 5	09/12/2014	600	123000 - 123600 s	36.2	563.8
6	9	First stage	1	OPN4 5	09/12/2014	600	123600 - 124200 s	57.4	542.6
6	9	First stage	1	OPN4 5	09/12/2014	600	124200 - 124800 s	6.1	593.9
6	9	First stage	1	OPN4 5	09/12/2014	600	124800 - 125400 s	13	587
6	9	First stage	1	OPN4 5	09/12/2014	600	125400 - 126000 s	0	600
6	9	First stage	1	OPN4 5	09/12/2014	600	126000 - 126600 s	345.9	254.1
6	9	First stage	1	OPN4 5	09/12/2014	600	126600 - 127200 s	600	0
6	9	First stage	1	OPN4 5	09/12/2014	600	127200 - 127800 s	600	0
6	9	First stage	1	OPN4 5	09/12/2014	600	127800 - 128400 s	600	0
6	9	First stage	1	OPN4 5	09/12/2014	600	128400 - 129000 s	600	0
6	9	First stage	1	OPN4 5	09/12/2014	600	129000 - 129600 s	600	0
6	9	First stage	1	OPN4 5	09/12/2014	600	129600 - 130200 s	600	0
6	9	First stage	1	OPN4 5	09/12/2014	600	130200 - 130800 s	414.4	185.6
6	9	First stage	1	OPN4 5	09/12/2014	600	130800 - 131400 s	43.2	556.8
6	9	First stage	1	OPN4 5	09/12/2014	600	131400 - 132000 s	62.4	537.6
6	9	First stage	1	OPN4 5	09/12/2014	600	132000 - 132600 s	0	600
6	9	First stage	1	OPN4 5	09/12/2014	600	132600 - 133200 s	2	598
6	9	First stage	1	OPN4 5	09/12/2014	600	133200 - 133800 s	33.5	566.5
6	9	First stage	1	OPN4 5	09/12/2014	600	133800 - 134400 s	10.2	589.8
6	9	First stage	1	OPN4 5	09/12/2014	600	134400 - 135000 s	35.6	564.4
6	9	First stage	1	OPN4 5	09/12/2014	600	135000 - 135600 s	1	599
6	9	First stage	1	OPN4 5	09/12/2014	600	135600 - 136200 s	1	599
6	9	First stage	1	OPN4 5	09/12/2014	600	136200 - 136800 s	1	599
6	9	First stage	1	OPN4 5	09/12/2014	600	136800 - 137400 s	3	597
6	9	First stage	1	OPN4 5	09/12/2014	600	137400 - 138000 s	1	599
6	9	First stage	1	OPN4 5	09/12/2014	600	138000 - 138600 s	3.4	596.6
6	9	First stage	1	OPN4 5	09/12/2014	600	138600 - 139200 s	2	598
6	9	First stage	1	OPN4 5	09/12/2014	600	139200 - 139800 s	1	599
6	9	First stage	1	OPN4 5	09/12/2014	600	139800 - 140400 s	60.6	539.4
6	9	First stage	1	OPN4 5	09/12/2014	600	140400 - 141000 s	380.4	219.6
6	9	First stage	1	OPN4 5	09/12/2014	600	141000 - 141600 s	444.4	155.6
6	9	First stage	1	OPN4 5	09/12/2014	600	141600 - 142200 s	2	598
6	9	First stage	1	OPN4 5	09/12/2014	600	142200 - 142800 s	151.3	448.7
6	9	First stage	1	OPN4 5	09/12/2014	600	142800 - 143400 s	4.2	595.8
6	9	First stage	1	OPN4 5	09/12/2014	600	143400 - 144000 s	386.7	213.3
6	9	First stage	1	OPN4 5	09/12/2014	600	144000 - 144600 s	122	478
6	9	First stage	1	OPN4 5	09/12/2014	600	144600 - 145200 s	43.6	556.4
6	9	First stage	1	OPN4 5	09/12/2014	600	145200 - 145800 s	3	597
6	9	First stage	1	OPN4 5	09/12/2014	600	145800 - 146400 s	0	600
6	9	First stage	1	OPN4 5	09/12/2014	600	146400 - 147000 s	0	600
6	9	First stage	1	OPN4 5	09/12/2014	600	147000 - 147600 s	45.2	554.8
6	9	First stage	1	OPN4 5	09/12/2014	600	147600 - 148200 s	2	598
6	9	First stage	1	OPN4 5	09/12/2014	600	148200 - 148800 s	12.1	587.9
6	9	First stage	1	OPN4 5	09/12/2014	600	148800 - 149400 s	519.4	80.6
6	9	First stage	1	OPN4 5	09/12/2014	600	149400 - 150000 s	600	0
6	9	First stage	1	OPN4 5	09/12/2014	600	150000 - 150600 s	546.6	53.4
6	9	First stage	1	OPN4 5	09/12/2014	600	150600 - 151200 s	198.3	401.7
6	9	First stage	1	OPN4 5	09/12/2014	600	151200 - 151800 s	59.6	540.4
6	9	First stage	1	OPN4 5	09/12/2014	600	151800 - 152400 s	12.2	587.8
6	9	First stage	1	OPN4 5	09/12/2014	600	152400 - 153000 s	7	593
6	9	First stage	1	OPN4 5	09/12/2014	600	153000 - 153600 s	7	593
6	9	First stage	1	OPN4 5	09/12/2014	600	153600 - 154200 s	2	598
6	9	First stage	1	OPN4 5	09/12/2014	600	154200 - 154800 s	4.2	595.8
6	9	First stage	1	OPN4 5	09/12/2014	600	154800 - 155400 s	2	598
6	9	First stage	1	OPN4 5	09/12/2014	600	155400 - 156000 s	2	598
6	9	First stage	1	OPN4 5	09/12/2014	600	156000 - 156600 s	0	600
6	9	First stage	1	OPN4 5	09/12/2014	600	156600 - 157200 s	1	599
6	9	First stage	1	OPN4 5	09/12/2014	600	157200 - 157800 s	0	600
6	9	First stage	1	OPN4 5	09/12/2014	600	157800 - 158400 s	441.3	158.7
6	9	First stage	1	OPN4 5	09/12/2014	600	158400 - 159000 s	43.4	556.6
6	9	First stage	1	OPN4 5	09/12/2014	600	159000 - 159600 s	40.7	559.3
6	9	First stage	1	OPN4 5	09/12/2014	600	159600 - 160200 s	4	596
6	9	First stage	1	OPN4 5	09/12/2014	600	160200 - 160800 s	1	599
6	9	First stage	1	OPN4 5	09/12/2014	600	160800 - 161400 s	20.6	579.4
6	9	First stage	1	OPN4 5	09/12/2014	600	161400 - 162000 s	0	600
6	9	First stage	1	OPN4 5	09/12/2014	600	162000 - 162600 s	340.8	259.2
6	9	First stage	1	OPN4 5	09/12/2014	600	162600 - 163200 s	427.1	172.9
6	9	First stage	1	OPN4 5	09/12/2014	600	163200 - 163800 s	600	0
6	9	First stage	1	OPN4 5	09/12/2014	600	163800 - 164400 s	503.4	96.6
6	9	First stage	1	OPN4 5	09/12/2014	600	164400 - 165000 s	600	0
6	9	First stage	1	OPN4 5	09/12/2014	600	165000 - 165600 s	600	0
6	9	First stage	1	OPN4 5	09/12/2014	600	165600 - 166200 s	600	0
6	9	First stage	1	OPN4 5	09/12/2014	600	166200 - 166800 s	336.4	263.6
6	9	First stage	1	OPN4 5	09/12/2014	600	166800 - 167400 s	89.2	510.8
6	9	First stage	1	OPN4 5	09/12/2014	600	167400 - 168000 s	42	558
6	9	First stage	1	OPN4 5	09/12/2014	600	168000 - 168600 s	55.9	544.1
6	9	First stage	1	OPN4 5	09/12/2014	600	168600 - 169200 s	6	594
6	9	First stage	1	OPN4 5	09/12/2014	600	169200 - 169800 s	84	516
6	9	First stage	1	OPN4 5	09/12/2014	600	169800 - 170400 s	243.8	356.2
6	9	First stage	1	OPN4 5	09/12/2014	600	170400 - 171000 s	543.2	56.8
6	9	First stage	1	OPN4 5	09/12/2014	600	171000 - 171600 s	600	0
6	9	First stage	1	OPN4 5	09/12/2014	600	171600 - 172200 s	600	0
6	9	First stage	1	OPN4 5	09/12/2014	600	172200 - 172800 s	600	0
6	9	First stage	1	OPN4 5	09/12/2014	600	172800 - 173400 s	585.2	14.8
6	9	First stage	1	OPN4 5	09/12/2014	600	173400 - 174000 s	520.3	79.7
6	9	First stage	1	OPN4 5	09/12/2014	600	174000 - 174600 s	600	0
6	9	First stage	1	OPN4 5	09/12/2014	600	174600 - 175200 s	600	0
6	9	First stage	1	OPN4 5	09/12/2014	600	175200 - 175800 s	600	0
6	9	First stage	1	OPN4 5	09/12/2014	600	175800 - 176400 s	600	0
6	9	First stage	1	OPN4 5	09/12/2014	600	176400 - 177000 s	600	0
6	9	First stage	1	OPN4 5	09/12/2014	600	177000 - 177600 s	600	0
6	9	First stage	1	OPN4 5	09/12/2014	600	177600 - 178200 s	600	0
6	9	First stage	1	OPN4 5	09/12/2014	600	178200 - 178800 s	600	0
6	9	First stage	1	OPN4 5	09/12/2014	600	178800 - 179400 s	542.8	57.2
6	9	First stage	1	OPN4 5	09/12/2014	600	179400 - 180000 s	600	0
6	9	First stage	1	OPN4 5	09/12/2014	600	180000 - 180600 s	600	0
6	9	First stage	1	OPN4 5	09/12/2014	600	180600 - 181200 s	600	0
6	9	First stage	1	OPN4 5	09/12/2014	600	181200 - 181800 s	600	0
6	9	First stage	1	OPN4 5	09/12/2014	600	181800 - 182400 s	600	0
6	9	First stage	1	OPN4 5	09/12/2014	600	182400 - 183000 s	600	0
6	9	First stage	1	OPN4 5	09/12/2014	600	183000 - 183600 s	600	0
6	9	First stage	1	OPN4 5	09/12/2014	600	183600 - 184200 s	514.4	85.6
6	9	First stage	1	OPN4 5	09/12/2014	600	184200 - 184800 s	600	0
6	9	First stage	1	OPN4 5	09/12/2014	600	184800 - 185400 s	600	0
6	9	First stage	1	OPN4 5	09/12/2014	600	185400 - 186000 s	559.6	40.4
6	9	First stage	1	OPN4 5	09/12/2014	600	186000 - 186600 s	600	0
6	9	First stage	1	OPN4 5	09/12/2014	600	186600 - 187200 s	557.4	42.6
6	9	First stage	1	OPN4 5	09/12/2014	600	187200 - 187800 s	600	0
6	9	First stage	1	OPN4 5	09/12/2014	600	187800 - 188400 s	600	0
6	9	First stage	1	OPN4 5	09/12/2014	600	188400 - 189000 s	600	0
6	9	First stage	1	OPN4 5	09/12/2014	600	189000 - 189600 s	436.2	163.8
6	9	First stage	1	OPN4 5	09/12/2014	600	189600 - 190200 s	600	0
6	9	First stage	1	OPN4 5	09/12/2014	600	190200 - 190800 s	575.7	24.3
6	9	First stage	1	OPN4 5	09/12/2014	600	190800 - 191400 s	478.4	121.7
6	9	First stage	1	OPN4 5	09/12/2014	600	191400 - 192000 s	553.8	46.2
6	9	First stage	1	OPN4 5	09/12/2014	600	192000 - 192600 s	600	0
6	9	First stage	1	OPN4 5	09/12/2014	600	192600 - 193200 s	552.7	47.3
6	9	First stage	1	OPN4 5	09/12/2014	600	193200 - 193800 s	600	0
6	9	First stage	1	OPN4 5	09/12/2014	600	193800 - 194400 s	292.4	307.6
6	9	First stage	1	OPN4 5	09/12/2014	600	194400 - 195000 s	275.7	324.3
6	9	First stage	1	OPN4 5	09/12/2014	600	195000 - 195600 s	34.6	565.4
6	9	First stage	1	OPN4 5	09/12/2014	600	195600 - 196200 s	53.5	546.5
6	9	First stage	1	OPN4 5	09/12/2014	600	196200 - 196800 s	11.1	588.9
6	9	First stage	1	OPN4 5	09/12/2014	600	196800 - 197400 s	56.9	543.1
6	9	First stage	1	OPN4 5	09/12/2014	600	197400 - 198000 s	69.4	530.6
6	9	First stage	1	OPN4 5	09/12/2014	600	198000 - 198600 s	95.2	504.8
6	9	First stage	1	OPN4 5	09/12/2014	600	198600 - 199200 s	36.6	563.4
6	9	First stage	1	OPN4 5	09/12/2014	600	199200 - 199800 s	146	454
6	9	First stage	1	OPN4 5	09/12/2014	600	199800 - 200400 s	70.4	529.6
6	9	First stage	1	OPN4 5	09/12/2014	600	200400 - 201000 s	600	0
6	9	First stage	1	OPN4 5	09/12/2014	600	201000 - 201600 s	600	0
6	9	First stage	1	OPN4 5	09/12/2014	600	201600 - 202200 s	600	0
6	9	First stage	1	OPN4 5	09/12/2014	600	202200 - 202800 s	430	170
6	9	First stage	1	OPN4 5	09/12/2014	600	202800 - 203400 s	600	0
6	9	First stage	1	OPN4 5	09/12/2014	600	203400 - 204000 s	471.4	128.6
6	9	First stage	1	OPN4 5	09/12/2014	600	204000 - 204600 s	567.9	32.1
6	9	First stage	1	OPN4 5	09/12/2014	600	204600 - 205200 s	453.2	146.8
6	9	First stage	1	OPN4 5	09/12/2014	600	205200 - 205800 s	600	0
6	9	First stage	1	OPN4 5	09/12/2014	600	205800 - 206400 s	600	0
6	9	First stage	1	OPN4 5	09/12/2014	600	206400 - 207000 s	600	0
6	9	First stage	1	OPN4 5	09/12/2014	600	207000 - 207600 s	600	0
6	9	First stage	1	OPN4 5	09/12/2014	600	207600 - 208200 s	600	0
6	9	First stage	1	OPN4 5	09/12/2014	600	208200 - 208800 s	341.8	258.2
6	9	First stage	1	OPN4 5	09/12/2014	600	208800 - 209400 s	438.7	161.3
6	9	First stage	1	OPN4 5	09/12/2014	600	209400 - 210000 s	179.9	420.1
6	9	First stage	1	OPN4 5	09/12/2014	600	210000 - 210600 s	19.3	580.7
6	9	First stage	1	OPN4 5	09/12/2014	600	210600 - 211200 s	80	520
6	9	First stage	1	OPN4 5	09/12/2014	600	211200 - 211800 s	51.5	548.5
6	9	First stage	1	OPN4 5	09/12/2014	600	211800 - 212400 s	91.7	508.3
6	9	First stage	1	OPN4 5	09/12/2014	600	212400 - 213000 s	105.4	494.6
6	9	First stage	1	OPN4 5	09/12/2014	600	213000 - 213600 s	34.6	565.4
6	9	First stage	1	OPN4 5	09/12/2014	600	213600 - 214200 s	7.9	592.1
6	9	First stage	1	OPN4 5	09/12/2014	600	214200 - 214800 s	600	0
6	9	First stage	1	OPN4 5	09/12/2014	600	214800 - 215400 s	600	0
6	9	First stage	1	OPN4 5	09/12/2014	600	215400 - 216000 s	439.2	160.8
7	6	First stage	1	OPN4 6	09/12/2014	600	0 - 600 secs.	600	0
7	6	First stage	1	OPN4 6	09/12/2014	600	600 - 1200 secs.	600	0
7	6	First stage	1	OPN4 6	09/12/2014	600	1200 - 1800 secs.	600	0
7	6	First stage	1	OPN4 6	09/12/2014	600	1800 - 2400 secs.	600	0
7	6	First stage	1	OPN4 6	09/12/2014	600	2400 - 3000 secs.	600	0
7	6	First stage	1	OPN4 6	09/12/2014	600	3000 - 3600 secs.	600	0
7	6	First stage	1	OPN4 6	09/12/2014	600	3600 - 4200 secs.	600	0
7	6	First stage	1	OPN4 6	09/12/2014	600	4200 - 4800 secs.	600	0
7	6	First stage	1	OPN4 6	09/12/2014	600	4800 - 5400 secs.	600	0
7	6	First stage	1	OPN4 6	09/12/2014	600	5400 - 6000 secs.	546.3	53.7
7	6	First stage	1	OPN4 6	09/12/2014	600	6000 - 6600 secs.	600	0
7	6	First stage	1	OPN4 6	09/12/2014	600	6600 - 7200 secs.	600	0
7	6	First stage	1	OPN4 6	09/12/2014	600	7200 - 7800 secs.	600	0
7	6	First stage	1	OPN4 6	09/12/2014	600	7800 - 8400 secs.	600	0
7	6	First stage	1	OPN4 6	09/12/2014	600	8400 - 9000 secs.	600	0
7	6	First stage	1	OPN4 6	09/12/2014	600	9000 - 9600 secs.	551.6	48.4
7	6	First stage	1	OPN4 6	09/12/2014	600	9600 - 10200 secs	219.3	380.7
7	6	First stage	1	OPN4 6	09/12/2014	600	10200 - 10800 sec	38.5	561.5
7	6	First stage	1	OPN4 6	09/12/2014	600	10800 - 11400 sec	100	500
7	6	First stage	1	OPN4 6	09/12/2014	600	11400 - 12000 sec	191.5	408.5
7	6	First stage	1	OPN4 6	09/12/2014	600	12000 - 12600 sec	426.3	173.7
7	6	First stage	1	OPN4 6	09/12/2014	600	12600 - 13200 sec	600	0
7	6	First stage	1	OPN4 6	09/12/2014	600	13200 - 13800 sec	600	0
7	6	First stage	1	OPN4 6	09/12/2014	600	13800 - 14400 sec	600	0
7	6	First stage	1	OPN4 6	09/12/2014	600	14400 - 15000 sec	600	0
7	6	First stage	1	OPN4 6	09/12/2014	600	15000 - 15600 sec	600	0
7	6	First stage	1	OPN4 6	09/12/2014	600	15600 - 16200 sec	600	0
7	6	First stage	1	OPN4 6	09/12/2014	600	16200 - 16800 sec	600	0
7	6	First stage	1	OPN4 6	09/12/2014	600	16800 - 17400 sec	600	0
7	6	First stage	1	OPN4 6	09/12/2014	600	17400 - 18000 sec	600	0
7	6	First stage	1	OPN4 6	09/12/2014	600	18000 - 18600 sec	600	0
7	6	First stage	1	OPN4 6	09/12/2014	600	18600 - 19200 sec	551.5	48.5
7	6	First stage	1	OPN4 6	09/12/2014	600	19200 - 19800 sec	600	0
7	6	First stage	1	OPN4 6	09/12/2014	600	19800 - 20400 sec	600	0
7	6	First stage	1	OPN4 6	09/12/2014	600	20400 - 21000 sec	600	0
7	6	First stage	1	OPN4 6	09/12/2014	600	21000 - 21600 sec	600	0
7	6	First stage	1	OPN4 6	09/12/2014	600	21600 - 22200 sec	600	0
7	6	First stage	1	OPN4 6	09/12/2014	600	22200 - 22800 sec	600	0
7	6	First stage	1	OPN4 6	09/12/2014	600	22800 - 23400 sec	600	0
7	6	First stage	1	OPN4 6	09/12/2014	600	23400 - 24000 sec	600	0
7	6	First stage	1	OPN4 6	09/12/2014	600	24000 - 24600 sec	600	0
7	6	First stage	1	OPN4 6	09/12/2014	600	24600 - 25200 sec	600	0
7	6	First stage	1	OPN4 6	09/12/2014	600	25200 - 25800 sec	600	0
7	6	First stage	1	OPN4 6	09/12/2014	600	25800 - 26400 sec	600	0
7	6	First stage	1	OPN4 6	09/12/2014	600	26400 - 27000 sec	600	0
7	6	First stage	1	OPN4 6	09/12/2014	600	27000 - 27600 sec	600	0
7	6	First stage	1	OPN4 6	09/12/2014	600	27600 - 28200 sec	600	0
7	6	First stage	1	OPN4 6	09/12/2014	600	28200 - 28800 sec	545.1	54.9
7	6	First stage	1	OPN4 6	09/12/2014	600	28800 - 29400 sec	254.5	345.5
7	6	First stage	1	OPN4 6	09/12/2014	600	29400 - 30000 sec	76.9	523.1
7	6	First stage	1	OPN4 6	09/12/2014	600	30000 - 30600 sec	48.4	551.6
7	6	First stage	1	OPN4 6	09/12/2014	600	30600 - 31200 sec	11	589
7	6	First stage	1	OPN4 6	09/12/2014	600	31200 - 31800 sec	18.1	581.9
7	6	First stage	1	OPN4 6	09/12/2014	600	31800 - 32400 sec	15.1	584.9
7	6	First stage	1	OPN4 6	09/12/2014	600	32400 - 33000 sec	34.5	565.5
7	6	First stage	1	OPN4 6	09/12/2014	600	33000 - 33600 sec	358.8	241.2
7	6	First stage	1	OPN4 6	09/12/2014	600	33600 - 34200 sec	600	0
7	6	First stage	1	OPN4 6	09/12/2014	600	34200 - 34800 sec	600	0
7	6	First stage	1	OPN4 6	09/12/2014	600	34800 - 35400 sec	600	0
7	6	First stage	1	OPN4 6	09/12/2014	600	35400 - 36000 sec	600	0
7	6	First stage	1	OPN4 6	09/12/2014	600	36000 - 36600 sec	600	0
7	6	First stage	1	OPN4 6	09/12/2014	600	36600 - 37200 sec	600	0
7	6	First stage	1	OPN4 6	09/12/2014	600	37200 - 37800 sec	600	0
7	6	First stage	1	OPN4 6	09/12/2014	600	37800 - 38400 sec	525.7	74.4
7	6	First stage	1	OPN4 6	09/12/2014	600	38400 - 39000 sec	600	0
7	6	First stage	1	OPN4 6	09/12/2014	600	39000 - 39600 sec	600	0
7	6	First stage	1	OPN4 6	09/12/2014	600	39600 - 40200 sec	600	0
7	6	First stage	1	OPN4 6	09/12/2014	600	40200 - 40800 sec	600	0
7	6	First stage	1	OPN4 6	09/12/2014	600	40800 - 41400 sec	124.8	475.3
7	6	First stage	1	OPN4 6	09/12/2014	600	41400 - 42000 sec	72.4	527.6
7	6	First stage	1	OPN4 6	09/12/2014	600	42000 - 42600 sec	600	0
7	6	First stage	1	OPN4 6	09/12/2014	600	42600 - 43200 sec	600	0
7	6	First stage	1	OPN4 6	09/12/2014	600	43200 - 43800 sec	600	0
7	6	First stage	1	OPN4 6	09/12/2014	600	43800 - 44400 sec	545.7	54.4
7	6	First stage	1	OPN4 6	09/12/2014	600	44400 - 45000 sec	516.7	83.4
7	6	First stage	1	OPN4 6	09/12/2014	600	45000 - 45600 sec	417.5	182.5
7	6	First stage	1	OPN4 6	09/12/2014	600	45600 - 46200 sec	25.5	574.5
7	6	First stage	1	OPN4 6	09/12/2014	600	46200 - 46800 sec	71	529
7	6	First stage	1	OPN4 6	09/12/2014	600	46800 - 47400 sec	156.1	443.9
7	6	First stage	1	OPN4 6	09/12/2014	600	47400 - 48000 sec	25.1	574.9
7	6	First stage	1	OPN4 6	09/12/2014	600	48000 - 48600 sec	46.6	553.4
7	6	First stage	1	OPN4 6	09/12/2014	600	48600 - 49200 sec	96.6	503.4
7	6	First stage	1	OPN4 6	09/12/2014	600	49200 - 49800 sec	96.4	503.6
7	6	First stage	1	OPN4 6	09/12/2014	600	49800 - 50400 sec	18.1	581.9
7	6	First stage	1	OPN4 6	09/12/2014	600	50400 - 51000 sec	87.7	512.3
7	6	First stage	1	OPN4 6	09/12/2014	600	51000 - 51600 sec	156.2	443.8
7	6	First stage	1	OPN4 6	09/12/2014	600	51600 - 52200 sec	15.1	584.9
7	6	First stage	1	OPN4 6	09/12/2014	600	52200 - 52800 sec	21.3	578.7
7	6	First stage	1	OPN4 6	09/12/2014	600	52800 - 53400 sec	61.6	538.4
7	6	First stage	1	OPN4 6	09/12/2014	600	53400 - 54000 sec	0	600
7	6	First stage	1	OPN4 6	09/12/2014	600	54000 - 54600 sec	29.5	570.5
7	6	First stage	1	OPN4 6	09/12/2014	600	54600 - 55200 sec	0	600
7	6	First stage	1	OPN4 6	09/12/2014	600	55200 - 55800 sec	84.3	515.7
7	6	First stage	1	OPN4 6	09/12/2014	600	55800 - 56400 sec	476.3	123.7
7	6	First stage	1	OPN4 6	09/12/2014	600	56400 - 57000 sec	600	0
7	6	First stage	1	OPN4 6	09/12/2014	600	57000 - 57600 sec	525.8	74.2
7	6	First stage	1	OPN4 6	09/12/2014	600	57600 - 58200 sec	161.9	438.1
7	6	First stage	1	OPN4 6	09/12/2014	600	58200 - 58800 sec	76.2	523.8
7	6	First stage	1	OPN4 6	09/12/2014	600	58800 - 59400 sec	30.2	569.8
7	6	First stage	1	OPN4 6	09/12/2014	600	59400 - 60000 sec	60.8	539.2
7	6	First stage	1	OPN4 6	09/12/2014	600	60000 - 60600 sec	6.1	593.9
7	6	First stage	1	OPN4 6	09/12/2014	600	60600 - 61200 sec	4.1	595.9
7	6	First stage	1	OPN4 6	09/12/2014	600	61200 - 61800 sec	1	599
7	6	First stage	1	OPN4 6	09/12/2014	600	61800 - 62400 sec	21.2	578.8
7	6	First stage	1	OPN4 6	09/12/2014	600	62400 - 63000 sec	53.3	546.7
7	6	First stage	1	OPN4 6	09/12/2014	600	63000 - 63600 sec	41.7	558.3
7	6	First stage	1	OPN4 6	09/12/2014	600	63600 - 64200 sec	1	599
7	6	First stage	1	OPN4 6	09/12/2014	600	64200 - 64800 sec	31.5	568.5
7	6	First stage	1	OPN4 6	09/12/2014	600	64800 - 65400 sec	19.5	580.5
7	6	First stage	1	OPN4 6	09/12/2014	600	65400 - 66000 sec	69.8	530.2
7	6	First stage	1	OPN4 6	09/12/2014	600	66000 - 66600 sec	133.3	466.7
7	6	First stage	1	OPN4 6	09/12/2014	600	66600 - 67200 sec	600	0
7	6	First stage	1	OPN4 6	09/12/2014	600	67200 - 67800 sec	600	0
7	6	First stage	1	OPN4 6	09/12/2014	600	67800 - 68400 sec	556.2	43.8
7	6	First stage	1	OPN4 6	09/12/2014	600	68400 - 69000 sec	349	251
7	6	First stage	1	OPN4 6	09/12/2014	600	69000 - 69600 sec	56.6	543.4
7	6	First stage	1	OPN4 6	09/12/2014	600	69600 - 70200 sec	43.4	556.6
7	6	First stage	1	OPN4 6	09/12/2014	600	70200 - 70800 sec	72.2	527.8
7	6	First stage	1	OPN4 6	09/12/2014	600	70800 - 71400 sec	53.6	546.4
7	6	First stage	1	OPN4 6	09/12/2014	600	71400 - 72000 sec	15.2	584.8
7	6	First stage	1	OPN4 6	09/12/2014	600	72000 - 72600 sec	68.6	531.4
7	6	First stage	1	OPN4 6	09/12/2014	600	72600 - 73200 sec	46.5	553.5
7	6	First stage	1	OPN4 6	09/12/2014	600	73200 - 73800 sec	187.5	412.5
7	6	First stage	1	OPN4 6	09/12/2014	600	73800 - 74400 sec	30.9	569.1
7	6	First stage	1	OPN4 6	09/12/2014	600	74400 - 75000 sec	12.2	587.8
7	6	First stage	1	OPN4 6	09/12/2014	600	75000 - 75600 sec	74.8	525.2
7	6	First stage	1	OPN4 6	09/12/2014	600	75600 - 76200 sec	27.6	572.4
7	6	First stage	1	OPN4 6	09/12/2014	600	76200 - 76800 sec	122.8	477.2
7	6	First stage	1	OPN4 6	09/12/2014	600	76800 - 77400 sec	13.1	586.9
7	6	First stage	1	OPN4 6	09/12/2014	600	77400 - 78000 sec	233.9	366.1
7	6	First stage	1	OPN4 6	09/12/2014	600	78000 - 78600 sec	475.6	124.4
7	6	First stage	1	OPN4 6	09/12/2014	600	78600 - 79200 sec	600	0
7	6	First stage	1	OPN4 6	09/12/2014	600	79200 - 79800 sec	600	0
7	6	First stage	1	OPN4 6	09/12/2014	600	79800 - 80400 sec	300.7	299.3
7	6	First stage	1	OPN4 6	09/12/2014	600	80400 - 81000 sec	48	552
7	6	First stage	1	OPN4 6	09/12/2014	600	81000 - 81600 sec	1	599
7	6	First stage	1	OPN4 6	09/12/2014	600	81600 - 82200 sec	9.1	590.9
7	6	First stage	1	OPN4 6	09/12/2014	600	82200 - 82800 sec	374	226
7	6	First stage	1	OPN4 6	09/12/2014	600	82800 - 83400 sec	459	141
7	6	First stage	1	OPN4 6	09/12/2014	600	83400 - 84000 sec	30.4	569.6
7	6	First stage	1	OPN4 6	09/12/2014	600	84000 - 84600 sec	223.2	376.8
7	6	First stage	1	OPN4 6	09/12/2014	600	84600 - 85200 sec	600	0
7	6	First stage	1	OPN4 6	09/12/2014	600	85200 - 85800 sec	600	0
7	6	First stage	1	OPN4 6	09/12/2014	600	85800 - 86400 sec	476.8	123.2
7	6	First stage	1	OPN4 6	09/12/2014	600	86400 - 87000 sec	532.6	67.4
7	6	First stage	1	OPN4 6	09/12/2014	600	87000 - 87600 sec	600	0
7	6	First stage	1	OPN4 6	09/12/2014	600	87600 - 88200 sec	600	0
7	6	First stage	1	OPN4 6	09/12/2014	600	88200 - 88800 sec	600	0
7	6	First stage	1	OPN4 6	09/12/2014	600	88800 - 89400 sec	600	0
7	6	First stage	1	OPN4 6	09/12/2014	600	89400 - 90000 sec	600	0
7	6	First stage	1	OPN4 6	09/12/2014	600	90000 - 90600 sec	600	0
7	6	First stage	1	OPN4 6	09/12/2014	600	90600 - 91200 sec	600	0
7	6	First stage	1	OPN4 6	09/12/2014	600	91200 - 91800 sec	600	0
7	6	First stage	1	OPN4 6	09/12/2014	600	91800 - 92400 sec	600	0
7	6	First stage	1	OPN4 6	09/12/2014	600	92400 - 93000 sec	600	0
7	6	First stage	1	OPN4 6	09/12/2014	600	93000 - 93600 sec	600	0
7	6	First stage	1	OPN4 6	09/12/2014	600	93600 - 94200 sec	600	0
7	6	First stage	1	OPN4 6	09/12/2014	600	94200 - 94800 sec	197.4	402.6
7	6	First stage	1	OPN4 6	09/12/2014	600	94800 - 95400 sec	55.6	544.4
7	6	First stage	1	OPN4 6	09/12/2014	600	95400 - 96000 sec	72.6	527.4
7	6	First stage	1	OPN4 6	09/12/2014	600	96000 - 96600 sec	261.6	338.4
7	6	First stage	1	OPN4 6	09/12/2014	600	96600 - 97200 sec	600	0
7	6	First stage	1	OPN4 6	09/12/2014	600	97200 - 97800 sec	600	0
7	6	First stage	1	OPN4 6	09/12/2014	600	97800 - 98400 sec	600	0
7	6	First stage	1	OPN4 6	09/12/2014	600	98400 - 99000 sec	600	0
7	6	First stage	1	OPN4 6	09/12/2014	600	99000 - 99600 sec	600	0
7	6	First stage	1	OPN4 6	09/12/2014	600	99600 - 100200 se	600	0
7	6	First stage	1	OPN4 6	09/12/2014	600	100200 - 100800 s	600	0
7	6	First stage	1	OPN4 6	09/12/2014	600	100800 - 101400 s	600	0
7	6	First stage	1	OPN4 6	09/12/2014	600	101400 - 102000 s	600	0
7	6	First stage	1	OPN4 6	09/12/2014	600	102000 - 102600 s	600	0
7	6	First stage	1	OPN4 6	09/12/2014	600	102600 - 103200 s	600	0
7	6	First stage	1	OPN4 6	09/12/2014	600	103200 - 103800 s	549.6	50.4
7	6	First stage	1	OPN4 6	09/12/2014	600	103800 - 104400 s	540	60
7	6	First stage	1	OPN4 6	09/12/2014	600	104400 - 105000 s	600	0
7	6	First stage	1	OPN4 6	09/12/2014	600	105000 - 105600 s	600	0
7	6	First stage	1	OPN4 6	09/12/2014	600	105600 - 106200 s	600	0
7	6	First stage	1	OPN4 6	09/12/2014	600	106200 - 106800 s	600	0
7	6	First stage	1	OPN4 6	09/12/2014	600	106800 - 107400 s	600	0
7	6	First stage	1	OPN4 6	09/12/2014	600	107400 - 108000 s	556.3	43.7
7	6	First stage	1	OPN4 6	09/12/2014	600	108000 - 108600 s	600	0
7	6	First stage	1	OPN4 6	09/12/2014	600	108600 - 109200 s	600	0
7	6	First stage	1	OPN4 6	09/12/2014	600	109200 - 109800 s	600	0
7	6	First stage	1	OPN4 6	09/12/2014	600	109800 - 110400 s	600	0
7	6	First stage	1	OPN4 6	09/12/2014	600	110400 - 111000 s	529	71
7	6	First stage	1	OPN4 6	09/12/2014	600	111000 - 111600 s	101.5	498.5
7	6	First stage	1	OPN4 6	09/12/2014	600	111600 - 112200 s	25	575
7	6	First stage	1	OPN4 6	09/12/2014	600	112200 - 112800 s	18.4	581.6
7	6	First stage	1	OPN4 6	09/12/2014	600	112800 - 113400 s	131.4	468.6
7	6	First stage	1	OPN4 6	09/12/2014	600	113400 - 114000 s	210.6	389.4
7	6	First stage	1	OPN4 6	09/12/2014	600	114000 - 114600 s	118.7	481.3
7	6	First stage	1	OPN4 6	09/12/2014	600	114600 - 115200 s	23.3	576.7
7	6	First stage	1	OPN4 6	09/12/2014	600	115200 - 115800 s	125.8	474.2
7	6	First stage	1	OPN4 6	09/12/2014	600	115800 - 116400 s	512.8	87.2
7	6	First stage	1	OPN4 6	09/12/2014	600	116400 - 117000 s	600	0
7	6	First stage	1	OPN4 6	09/12/2014	600	117000 - 117600 s	600	0
7	6	First stage	1	OPN4 6	09/12/2014	600	117600 - 118200 s	600	0
7	6	First stage	1	OPN4 6	09/12/2014	600	118200 - 118800 s	600	0
7	6	First stage	1	OPN4 6	09/12/2014	600	118800 - 119400 s	600	0
[truncated: 881 more rows]

## Sheet: Fig2A raw daOPN4KO 405nm pulse 
Test	Animal	Stage	Trial	Apparatus	Date	Duration	Segment of test	Time mobile	Time immobile
5	5	First stage	1	OPN4 5	02/11/2014	600	0 - 600 secs.	600	0
5	5	First stage	1	OPN4 5	02/11/2014	600	600 - 1200 secs.	600	0
5	5	First stage	1	OPN4 5	02/11/2014	600	1200 - 1800 secs.	600	0
5	5	First stage	1	OPN4 5	02/11/2014	600	1800 - 2400 secs.	600	0
5	5	First stage	1	OPN4 5	02/11/2014	600	2400 - 3000 secs.	600	0
5	5	First stage	1	OPN4 5	02/11/2014	600	3000 - 3600 secs.	600	0
5	5	First stage	1	OPN4 5	02/11/2014	600	3600 - 4200 secs.	381	219
5	5	First stage	1	OPN4 5	02/11/2014	600	4200 - 4800 secs.	1	599
5	5	First stage	1	OPN4 5	02/11/2014	600	4800 - 5400 secs.	17	583
5	5	First stage	1	OPN4 5	02/11/2014	600	5400 - 6000 secs.	146.5	453.5
5	5	First stage	1	OPN4 5	02/11/2014	600	6000 - 6600 secs.	205.6	394.4
5	5	First stage	1	OPN4 5	02/11/2014	600	6600 - 7200 secs.	600	0
5	5	First stage	1	OPN4 5	02/11/2014	600	7200 - 7800 secs.	543.5	56.5
5	5	First stage	1	OPN4 5	02/11/2014	600	7800 - 8400 secs.	600	0
5	5	First stage	1	OPN4 5	02/11/2014	600	8400 - 9000 secs.	600	0
5	5	First stage	1	OPN4 5	02/11/2014	600	9000 - 9600 secs.	600	0
5	5	First stage	1	OPN4 5	02/11/2014	600	9600 - 10200 secs	600	0
5	5	First stage	1	OPN4 5	02/11/2014	600	10200 - 10800 sec	600	0
6	6	First stage	1	OPN4 6	02/11/2014	600	0 - 600 secs.	600	0
6	6	First stage	1	OPN4 6	02/11/2014	600	600 - 1200 secs.	600	0
6	6	First stage	1	OPN4 6	02/11/2014	600	1200 - 1800 secs.	600	0
6	6	First stage	1	OPN4 6	02/11/2014	600	1800 - 2400 secs.	600	0
6	6	First stage	1	OPN4 6	02/11/2014	600	2400 - 3000 secs.	600	0
6	6	First stage	1	OPN4 6	02/11/2014	600	3000 - 3600 secs.	549.7	50.3
6	6	First stage	1	OPN4 6	02/11/2014	600	3600 - 4200 secs.	268.5	331.5
6	6	First stage	1	OPN4 6	02/11/2014	600	4200 - 4800 secs.	46.7	553.3
6	6	First stage	1	OPN4 6	02/11/2014	600	4800 - 5400 secs.	1	599
6	6	First stage	1	OPN4 6	02/11/2014	600	5400 - 6000 secs.	246.1	353.9
6	6	First stage	1	OPN4 6	02/11/2014	600	6000 - 6600 secs.	325.3	274.7
6	6	First stage	1	OPN4 6	02/11/2014	600	6600 - 7200 secs.	502.1	97.9
6	6	First stage	1	OPN4 6	02/11/2014	600	7200 - 7800 secs.	600	0
6	6	First stage	1	OPN4 6	02/11/2014	600	7800 - 8400 secs.	600	0
6	6	First stage	1	OPN4 6	02/11/2014	600	8400 - 9000 secs.	274.7	325.3
6	6	First stage	1	OPN4 6	02/11/2014	600	9000 - 9600 secs.	600	0
6	6	First stage	1	OPN4 6	02/11/2014	600	9600 - 10200 secs	526	74
6	6	First stage	1	OPN4 6	02/11/2014	600	10200 - 10800 sec	496.9	103.1
7	8	First stage	1	OPN4 7	02/11/2014	600	0 - 600 secs.	593.857	6.14286
7	8	First stage	1	OPN4 7	02/11/2014	600	600 - 1200 secs.	584.1	15.9
7	8	First stage	1	OPN4 7	02/11/2014	600	1200 - 1800 secs.	547.229	52.7714
7	8	First stage	1	OPN4 7	02/11/2014	600	1800 - 2400 secs.	524	76
7	8	First stage	1	OPN4 7	02/11/2014	600	2400 - 3000 secs.	594.286	5.71429
7	8	First stage	1	OPN4 7	02/11/2014	600	3000 - 3600 secs.	548.714	51.2857
7	8	First stage	1	OPN4 7	02/11/2014	600	3600 - 4200 secs.	303.986	296.014
7	8	First stage	1	OPN4 7	02/11/2014	600	4200 - 4800 secs.	165.929	434.071
7	8	First stage	1	OPN4 7	02/11/2014	600	4800 - 5400 secs.	82.0286	517.971
7	8	First stage	1	OPN4 7	02/11/2014	600	5400 - 6000 secs.	184.214	415.786
7	8	First stage	1	OPN4 7	02/11/2014	600	6000 - 6600 secs.	310.1	289.9
7	8	First stage	1	OPN4 7	02/11/2014	600	6600 - 7200 secs.	551.8	48.2
7	8	First stage	1	OPN4 7	02/11/2014	600	7200 - 7800 secs.	563.286	36.7143
7	8	First stage	1	OPN4 7	02/11/2014	600	7800 - 8400 secs.	529.5	70.5
7	8	First stage	1	OPN4 7	02/11/2014	600	8400 - 9000 secs.	492.686	107.314
7	8	First stage	1	OPN4 7	02/11/2014	600	9000 - 9600 secs.	592.4	7.6
7	8	First stage	1	OPN4 7	02/11/2014	600	9600 - 10200 secs	546.229	53.7714
7	8	First stage	1	OPN4 7	02/11/2014	600	10200 - 10800 sec	496.557	103.443
8	7	First stage	1	OPN4 8	02/11/2014	600	0 - 600 secs.	600	0
8	7	First stage	1	OPN4 8	02/11/2014	600	600 - 1200 secs.	600	0
8	7	First stage	1	OPN4 8	02/11/2014	600	1200 - 1800 secs.	600	0
8	7	First stage	1	OPN4 8	02/11/2014	600	1800 - 2400 secs.	600	0
8	7	First stage	1	OPN4 8	02/11/2014	600	2400 - 3000 secs.	600	0
8	7	First stage	1	OPN4 8	02/11/2014	600	3000 - 3600 secs.	600	0
8	7	First stage	1	OPN4 8	02/11/2014	600	3600 - 4200 secs.	513.5	86.5
8	7	First stage	1	OPN4 8	02/11/2014	600	4200 - 4800 secs.	182.3	417.7
8	7	First stage	1	OPN4 8	02/11/2014	600	4800 - 5400 secs.	6	594
8	7	First stage	1	OPN4 8	02/11/2014	600	5400 - 6000 secs.	41.6	558.4
8	7	First stage	1	OPN4 8	02/11/2014	600	6000 - 6600 secs.	5	595
8	7	First stage	1	OPN4 8	02/11/2014	600	6600 - 7200 secs.	190.5	409.5
8	7	First stage	1	OPN4 8	02/11/2014	600	7200 - 7800 secs.	600	0
8	7	First stage	1	OPN4 8	02/11/2014	600	7800 - 8400 secs.	600	0
8	7	First stage	1	OPN4 8	02/11/2014	600	8400 - 9000 secs.	600	0
8	7	First stage	1	OPN4 8	02/11/2014	600	9000 - 9600 secs.	600	0
8	7	First stage	1	OPN4 8	02/11/2014	600	9600 - 10200 secs	600	0
8	7	First stage	1	OPN4 8	02/11/2014	600	10200 - 10800 sec	600	0
1	1	First stage	1	OPN4 4	02/11/2014	600	0 - 600 secs.	488.7	111.3
1	1	First stage	1	OPN4 4	02/11/2014	600	600 - 1200 secs.	600	0
1	1	First stage	1	OPN4 4	02/11/2014	600	1200 - 1800 secs.	438.3	161.7
1	1	First stage	1	OPN4 4	02/11/2014	600	1800 - 2400 secs.	560	40
1	1	First stage	1	OPN4 4	02/11/2014	600	2400 - 3000 secs.	600	0
1	1	First stage	1	OPN4 4	02/11/2014	600	3000 - 3600 secs.	600	0
1	1	First stage	1	OPN4 4	02/11/2014	600	3600 - 4200 secs.	600	0
1	1	First stage	1	OPN4 4	02/11/2014	600	4200 - 4800 secs.	193.7	406.3
1	1	First stage	1	OPN4 4	02/11/2014	600	4800 - 5400 secs.	8.3	591.7
1	1	First stage	1	OPN4 4	02/11/2014	600	5400 - 6000 secs.	86.3	513.7
1	1	First stage	1	OPN4 4	02/11/2014	600	6000 - 6600 secs.	480.5	119.5
1	1	First stage	1	OPN4 4	02/11/2014	600	6600 - 7200 secs.	600	0
1	1	First stage	1	OPN4 4	02/11/2014	600	7200 - 7800 secs.	530.4	69.6
1	1	First stage	1	OPN4 4	02/11/2014	600	7800 - 8400 secs.	600	0
1	1	First stage	1	OPN4 4	02/11/2014	600	8400 - 9000 secs.	546.8	53.2
1	1	First stage	1	OPN4 4	02/11/2014	600	9000 - 9600 secs.	307.8	292.2
1	1	First stage	1	OPN4 4	02/11/2014	600	9600 - 10200 secs	116.8	483.2
1	1	First stage	1	OPN4 4	02/11/2014	600	10200 - 10800 sec	428.4	171.6
2	2	First stage	1	OPN4 3	02/11/2014	600	0 - 600 secs.	600	0
2	2	First stage	1	OPN4 3	02/11/2014	600	600 - 1200 secs.	600	0
2	2	First stage	1	OPN4 3	02/11/2014	600	1200 - 1800 secs.	549.6	50.4
2	2	First stage	1	OPN4 3	02/11/2014	600	1800 - 2400 secs.	600	0
2	2	First stage	1	OPN4 3	02/11/2014	600	2400 - 3000 secs.	600	0
2	2	First stage	1	OPN4 3	02/11/2014	600	3000 - 3600 secs.	350.6	249.4
2	2	First stage	1	OPN4 3	02/11/2014	600	3600 - 4200 secs.	9.4	590.6
2	2	First stage	1	OPN4 3	02/11/2014	600	4200 - 4800 secs.	162.9	437.1
2	2	First stage	1	OPN4 3	02/11/2014	600	4800 - 5400 secs.	525.1	74.9
2	2	First stage	1	OPN4 3	02/11/2014	600	5400 - 6000 secs.	364.9	235.1
2	2	First stage	1	OPN4 3	02/11/2014	600	6000 - 6600 secs.	480	120
2	2	First stage	1	OPN4 3	02/11/2014	600	6600 - 7200 secs.	558.4	41.6
2	2	First stage	1	OPN4 3	02/11/2014	600	7200 - 7800 secs.	600	0
2	2	First stage	1	OPN4 3	02/11/2014	600	7800 - 8400 secs.	600	0
2	2	First stage	1	OPN4 3	02/11/2014	600	8400 - 9000 secs.	600	0
2	2	First stage	1	OPN4 3	02/11/2014	600	9000 - 9600 secs.	600	0
2	2	First stage	1	OPN4 3	02/11/2014	600	9600 - 10200 secs	533.5	66.5
2	2	First stage	1	OPN4 3	02/11/2014	600	10200 - 10800 sec	600	0
3	4	First stage	1	OPN4 1	02/11/2014	600	0 - 600 secs.	600	0
3	4	First stage	1	OPN4 1	02/11/2014	600	600 - 1200 secs.	600	0
3	4	First stage	1	OPN4 1	02/11/2014	600	1200 - 1800 secs.	600	0
3	4	First stage	1	OPN4 1	02/11/2014	600	1800 - 2400 secs.	600	0
3	4	First stage	1	OPN4 1	02/11/2014	600	2400 - 3000 secs.	600	0
3	4	First stage	1	OPN4 1	02/11/2014	600	3000 - 3600 secs.	291.7	308.3
3	4	First stage	1	OPN4 1	02/11/2014	600	3600 - 4200 secs.	417.4	182.6
3	4	First stage	1	OPN4 1	02/11/2014	600	4200 - 4800 secs.	109.1	490.9
3	4	First stage	1	OPN4 1	02/11/2014	600	4800 - 5400 secs.	44.9	555.1
3	4	First stage	1	OPN4 1	02/11/2014	600	5400 - 6000 secs.	263.5	336.5
3	4	First stage	1	OPN4 1	02/11/2014	600	6000 - 6600 secs.	600	0
3	4	First stage	1	OPN4 1	02/11/2014	600	6600 - 7200 secs.	600	0
3	4	First stage	1	OPN4 1	02/11/2014	600	7200 - 7800 secs.	600	0
3	4	First stage	1	OPN4 1	02/11/2014	600	7800 - 8400 secs.	600	0
3	4	First stage	1	OPN4 1	02/11/2014	600	8400 - 9000 secs.	600	0
3	4	First stage	1	OPN4 1	02/11/2014	600	9000 - 9600 secs.	600	0
3	4	First stage	1	OPN4 1	02/11/2014	600	9600 - 10200 secs	600	0
3	4	First stage	1	OPN4 1	02/11/2014	600	10200 - 10800 sec	600	0
4	3	First stage	1	OPN4 2	02/11/2014	600	0 - 600 secs.	600	0
4	3	First stage	1	OPN4 2	02/11/2014	600	600 - 1200 secs.	566.6	33.4
4	3	First stage	1	OPN4 2	02/11/2014	600	1200 - 1800 secs.	551.7	48.3
4	3	First stage	1	OPN4 2	02/11/2014	600	1800 - 2400 secs.	600	0
4	3	First stage	1	OPN4 2	02/11/2014	600	2400 - 3000 secs.	548.7	51.3
4	3	First stage	1	OPN4 2	02/11/2014	600	3000 - 3600 secs.	207	393
4	3	First stage	1	OPN4 2	02/11/2014	600	3600 - 4200 secs.	29.6	570.4
4	3	First stage	1	OPN4 2	02/11/2014	600	4200 - 4800 secs.	22	578
4	3	First stage	1	OPN4 2	02/11/2014	600	4800 - 5400 secs.	92.5	507.5
4	3	First stage	1	OPN4 2	02/11/2014	600	5400 - 6000 secs.	600	0
4	3	First stage	1	OPN4 2	02/11/2014	600	6000 - 6600 secs.	600	0
4	3	First stage	1	OPN4 2	02/11/2014	600	6600 - 7200 secs.	555.7	44.3
4	3	First stage	1	OPN4 2	02/11/2014	600	7200 - 7800 secs.	176.1	423.9
4	3	First stage	1	OPN4 2	02/11/2014	600	7800 - 8400 secs.	289.5	310.5
4	3	First stage	1	OPN4 2	02/11/2014	600	8400 - 9000 secs.	600	0
4	3	First stage	1	OPN4 2	02/11/2014	600	9000 - 9600 secs.	600	0
4	3	First stage	1	OPN4 2	02/11/2014	600	9600 - 10200 secs	600	0
4	3	First stage	1	OPN4 2	02/11/2014	600	10200 - 10800 sec	600	0

## Sheet: Fig2C raw dataOPN4 530nm pulse 
Test	Animal	Stage	Trial	Apparatus	Date	Duration	Segment of test	Time mobile	Time immobile
1	1	First stage	1	OPN4 1	04/03/2015	600	0 - 600 secs.	600	0
1	1	First stage	1	OPN4 1	04/03/2015	600	600 - 1200 secs.	600	0
1	1	First stage	1	OPN4 1	04/03/2015	600	1200 - 1800 secs.	600	0
1	1	First stage	1	OPN4 1	04/03/2015	600	1800 - 2400 secs.	600	0
1	1	First stage	1	OPN4 1	04/03/2015	600	2400 - 3000 secs.	600	0
1	1	First stage	1	OPN4 1	04/03/2015	600	3000 - 3600 secs.	600	0
1	1	First stage	1	OPN4 1	04/03/2015	600	3600 - 4200 secs.	600	0
1	1	First stage	1	OPN4 1	04/03/2015	600	4200 - 4800 secs.	600	0
1	1	First stage	1	OPN4 1	04/03/2015	600	4800 - 5400 secs.	600	0
1	1	First stage	1	OPN4 1	04/03/2015	600	5400 - 6000 secs.	600	0
1	1	First stage	1	OPN4 1	04/03/2015	600	6000 - 6600 secs.	600	0
1	1	First stage	1	OPN4 1	04/03/2015	600	6600 - 7200 secs.	600	0
1	1	First stage	1	OPN4 1	04/03/2015	600	7200 - 7800 secs.	600	0
1	1	First stage	1	OPN4 1	04/03/2015	600	7800 - 8400 secs.	600	0
1	1	First stage	1	OPN4 1	04/03/2015	600	8400 - 9000 secs.	600	0
1	1	First stage	1	OPN4 1	04/03/2015	600	9000 - 9600 secs.	600	0
1	1	First stage	1	OPN4 1	04/03/2015	600	9600 - 10200 secs	600	0
1	1	First stage	1	OPN4 1	04/03/2015	600	10200 - 10800 sec	600	0
1	1	First stage	1	OPN4 1	04/03/2015	600	10800 - 11400 sec	493.4	106.6
1	1	First stage	1	OPN4 1	04/03/2015	600	11400 - 12000 sec	600	0
1	1	First stage	1	OPN4 1	04/03/2015	600	12000 - 12600 sec	600	0
1	1	First stage	1	OPN4 1	04/03/2015	600	12600 - 13200 sec	600	0
1	1	First stage	1	OPN4 1	04/03/2015	600	13200 - 13800 sec	600	0
1	1	First stage	1	OPN4 1	04/03/2015	600	13800 - 14400 sec	600	0
1	1	First stage	1	OPN4 1	04/03/2015	600	14400 - 15000 sec	600	0
1	1	First stage	1	OPN4 1	04/03/2015	600	15000 - 15600 sec	600	0
1	1	First stage	1	OPN4 1	04/03/2015	600	15600 - 16200 sec	600	0
1	1	First stage	1	OPN4 1	04/03/2015	600	16200 - 16800 sec	600	0
1	1	First stage	1	OPN4 1	04/03/2015	600	16800 - 17400 sec	600	0
1	1	First stage	1	OPN4 1	04/03/2015	600	17400 - 18000 sec	600	0
1	1	First stage	1	OPN4 1	04/03/2015	600	18000 - 18600 sec	600	0
1	1	First stage	1	OPN4 1	04/03/2015	600	18600 - 19200 sec	554.8	45.2
1	1	First stage	1	OPN4 1	04/03/2015	600	19200 - 19800 sec	198	402
1	1	First stage	1	OPN4 1	04/03/2015	600	19800 - 20400 sec	30.2	569.8
1	1	First stage	1	OPN4 1	04/03/2015	600	20400 - 21000 sec	158	442
1	1	First stage	1	OPN4 1	04/03/2015	600	21000 - 21600 sec	103.4	496.6
1	1	First stage	1	OPN4 1	04/03/2015	600	21600 - 22200 sec	1.6	598.4
1	1	First stage	1	OPN4 1	04/03/2015	600	22200 - 22800 sec	164	436
1	1	First stage	1	OPN4 1	04/03/2015	600	22800 - 23400 sec	0.5	599.5
1	1	First stage	1	OPN4 1	04/03/2015	600	23400 - 24000 sec	222.4	377.6
1	1	First stage	1	OPN4 1	04/03/2015	600	24000 - 24600 sec	600	0
1	1	First stage	1	OPN4 1	04/03/2015	600	24600 - 25200 sec	600	0
1	1	First stage	1	OPN4 1	04/03/2015	600	25800 - 26400 sec	600	0
1	1	First stage	1	OPN4 1	04/03/2015	600	26400 - 27000 sec	600	0
1	1	First stage	1	OPN4 1	04/03/2015	600	27000 - 27600 sec	600	0
1	1	First stage	1	OPN4 1	04/03/2015	600	27600 - 28200 sec	600	0
1	1	First stage	1	OPN4 1	04/03/2015	600	28200 - 28800 sec	600	0
1	1	First stage	1	OPN4 1	04/03/2015	600	28800 - 29400 sec	600	0
1	1	First stage	1	OPN4 1	04/03/2015	600	29400 - 30000 sec	600	0
1	1	First stage	1	OPN4 1	04/03/2015	600	30000 - 30600 sec	556.8	43.2
1	1	First stage	1	OPN4 1	04/03/2015	600	30600 - 31200 sec	600	0
1	1	First stage	1	OPN4 1	04/03/2015	600	31200 - 31800 sec	600	0
1	1	First stage	1	OPN4 1	04/03/2015	600	31800 - 32400 sec	491.8	108.2
1	1	First stage	1	OPN4 1	04/03/2015	600	32400 - 33000 sec	54.6	545.4
1	1	First stage	1	OPN4 1	04/03/2015	600	33000 - 33600 sec	69.2	530.8
1	1	First stage	1	OPN4 1	04/03/2015	600	33600 - 34200 sec	42.2	557.8
1	1	First stage	1	OPN4 1	04/03/2015	600	34200 - 34800 sec	28.8	571.2
1	1	First stage	1	OPN4 1	04/03/2015	600	34800 - 35400 sec	13.1	586.9
1	1	First stage	1	OPN4 1	04/03/2015	600	35400 - 36000 sec	116.2	483.8
1	1	First stage	1	OPN4 1	04/03/2015	600	36000 - 36600 sec	28.3	571.7
1	1	First stage	1	OPN4 1	04/03/2015	600	36600 - 37200 sec	217.2	382.8
1	1	First stage	1	OPN4 1	04/03/2015	600	37200 - 37800 sec	600	0
1	1	First stage	1	OPN4 1	04/03/2015	600	37800 - 38400 sec	600	0
1	1	First stage	1	OPN4 1	04/03/2015	600	38400 - 39000 sec	600	0
1	1	First stage	1	OPN4 1	04/03/2015	600	39000 - 39600 sec	600	0
1	1	First stage	1	OPN4 1	04/03/2015	600	39600 - 40200 sec	600	0
1	1	First stage	1	OPN4 1	04/03/2015	600	40200 - 40800 sec	600	0
1	1	First stage	1	OPN4 1	04/03/2015	600	40800 - 41400 sec	480.4	119.6
1	1	First stage	1	OPN4 1	04/03/2015	600	41400 - 42000 sec	423.9	176.1
1	1	First stage	1	OPN4 1	04/03/2015	600	42000 - 42600 sec	26.2	573.8
1	1	First stage	1	OPN4 1	04/03/2015	600	42600 - 43200 sec	97.9	502.1
1	1	First stage	1	OPN4 1	04/03/2015	600	43200 - 43800 sec	41.1	558.9
1	1	First stage	1	OPN4 1	04/03/2015	600	43800 - 44400 sec	271.3	328.7
1	1	First stage	1	OPN4 1	04/03/2015	600	44400 - 45000 sec	346.2	253.8
1	1	First stage	1	OPN4 1	04/03/2015	600	45000 - 45600 sec	138.5	461.5
1	1	First stage	1	OPN4 1	04/03/2015	600	45600 - 46200 sec	30.9	569.1
1	1	First stage	1	OPN4 1	04/03/2015	600	46200 - 46800 sec	73.6	526.4
1	1	First stage	1	OPN4 1	04/03/2015	600	46800 - 47400 sec	13.5	586.5
1	1	First stage	1	OPN4 1	04/03/2015	600	47400 - 48000 sec	57.1	542.9
1	1	First stage	1	OPN4 1	04/03/2015	600	48000 - 48600 sec	28.5	571.5
1	1	First stage	1	OPN4 1	04/03/2015	600	48600 - 49200 sec	91.3	508.7
1	1	First stage	1	OPN4 1	04/03/2015	600	49200 - 49800 sec	193.5	406.5
1	1	First stage	1	OPN4 1	04/03/2015	600	49800 - 50400 sec	600	0
1	1	First stage	1	OPN4 1	04/03/2015	600	50400 - 51000 sec	430	170
1	1	First stage	1	OPN4 1	04/03/2015	600	51000 - 51600 sec	25.3	574.7
1	1	First stage	1	OPN4 1	04/03/2015	600	51600 - 52200 sec	3.6	596.4
1	1	First stage	1	OPN4 1	04/03/2015	600	52200 - 52800 sec	0	600
1	1	First stage	1	OPN4 1	04/03/2015	600	52800 - 53400 sec	15.3	584.7
1	1	First stage	1	OPN4 1	04/03/2015	600	53400 - 54000 sec	89	511
1	1	First stage	1	OPN4 1	04/03/2015	600	54000 - 54600 sec	41.1	558.9
1	1	First stage	1	OPN4 1	04/03/2015	600	54600 - 55200 sec	84.5	515.5
1	1	First stage	1	OPN4 1	04/03/2015	600	55200 - 55800 sec	10.9	589.1
1	1	First stage	1	OPN4 1	04/03/2015	600	55800 - 56400 sec	46.9	553.1
1	1	First stage	1	OPN4 1	04/03/2015	600	56400 - 57000 sec	8.8	591.2
1	1	First stage	1	OPN4 1	04/03/2015	600	57000 - 57600 sec	33.8	566.2
1	1	First stage	1	OPN4 1	04/03/2015	600	57600 - 58200 sec	54.7	545.3
1	1	First stage	1	OPN4 1	04/03/2015	600	58200 - 58800 sec	544.2	55.8
1	1	First stage	1	OPN4 1	04/03/2015	600	58800 - 59400 sec	600	0
1	1	First stage	1	OPN4 1	04/03/2015	600	59400 - 60000 sec	600	0
1	1	First stage	1	OPN4 1	04/03/2015	600	60000 - 60600 sec	330	270
1	1	First stage	1	OPN4 1	04/03/2015	600	60600 - 61200 sec	63.2	536.8
1	1	First stage	1	OPN4 1	04/03/2015	600	61200 - 61800 sec	142.8	457.2
1	1	First stage	1	OPN4 1	04/03/2015	600	61800 - 62400 sec	65.8	534.2
1	1	First stage	1	OPN4 1	04/03/2015	600	62400 - 63000 sec	2.6	597.4
1	1	First stage	1	OPN4 1	04/03/2015	600	63000 - 63600 sec	15.3	584.7
1	1	First stage	1	OPN4 1	04/03/2015	600	63600 - 64200 sec	28.1	571.9
1	1	First stage	1	OPN4 1	04/03/2015	600	64200 - 64800 sec	7.4	592.6
1	1	First stage	1	OPN4 1	04/03/2015	600	64800 - 65400 sec	33.4	566.6
1	1	First stage	1	OPN4 1	04/03/2015	600	65400 - 66000 sec	34.5	565.5
1	1	First stage	1	OPN4 1	04/03/2015	600	66000 - 66600 sec	7.3	592.7
1	1	First stage	1	OPN4 1	04/03/2015	600	66600 - 67200 sec	276	324
1	1	First stage	1	OPN4 1	04/03/2015	600	67200 - 67800 sec	600	0
1	1	First stage	1	OPN4 1	04/03/2015	600	67800 - 68400 sec	451.6	148.4
1	1	First stage	1	OPN4 1	04/03/2015	600	68400 - 69000 sec	54.2	545.8
1	1	First stage	1	OPN4 1	04/03/2015	600	69000 - 69600 sec	71.9	528.1
1	1	First stage	1	OPN4 1	04/03/2015	600	69600 - 70200 sec	42.8	557.2
1	1	First stage	1	OPN4 1	04/03/2015	600	70200 - 70800 sec	18.2	581.8
1	1	First stage	1	OPN4 1	04/03/2015	600	70800 - 71400 sec	0.5	599.5
1	1	First stage	1	OPN4 1	04/03/2015	600	71400 - 72000 sec	9.9	590.1
1	1	First stage	1	OPN4 1	04/03/2015	600	72000 - 72600 sec	76.4	523.6
1	1	First stage	1	OPN4 1	04/03/2015	600	72600 - 73200 sec	43.9	556.1
1	1	First stage	1	OPN4 1	04/03/2015	600	73200 - 73800 sec	54.3	545.7
1	1	First stage	1	OPN4 1	04/03/2015	600	73800 - 74400 sec	10.5	589.5
1	1	First stage	1	OPN4 1	04/03/2015	600	74400 - 75000 sec	1	599
1	1	First stage	1	OPN4 1	04/03/2015	600	75000 - 75600 sec	202.7	397.3
1	1	First stage	1	OPN4 1	04/03/2015	600	75600 - 76200 sec	600	0
1	1	First stage	1	OPN4 1	04/03/2015	600	76200 - 76800 sec	600	0
1	1	First stage	1	OPN4 1	04/03/2015	600	76800 - 77400 sec	600	0
1	1	First stage	1	OPN4 1	04/03/2015	600	77400 - 78000 sec	414.9	185.1
1	1	First stage	1	OPN4 1	04/03/2015	600	78000 - 78600 sec	12	588
1	1	First stage	1	OPN4 1	04/03/2015	600	78600 - 79200 sec	2.6	597.4
1	1	First stage	1	OPN4 1	04/03/2015	600	79200 - 79800 sec	25	575
1	1	First stage	1	OPN4 1	04/03/2015	600	79800 - 80400 sec	13.6	586.4
1	1	First stage	1	OPN4 1	04/03/2015	600	80400 - 81000 sec	54.6	545.4
1	1	First stage	1	OPN4 1	04/03/2015	600	81000 - 81600 sec	70.2	529.8
1	1	First stage	1	OPN4 1	04/03/2015	600	81600 - 82200 sec	487.3	112.7
1	1	First stage	1	OPN4 1	04/03/2015	600	82200 - 82800 sec	594.9	5.1
1	1	First stage	1	OPN4 1	04/03/2015	600	82800 - 83400 sec	129.8	470.2
1	1	First stage	1	OPN4 1	04/03/2015	600	83400 - 84000 sec	28.9	571.1
1	1	First stage	1	OPN4 1	04/03/2015	600	84000 - 84600 sec	70.5	529.5
1	1	First stage	1	OPN4 1	04/03/2015	600	84600 - 85200 sec	600	0
1	1	First stage	1	OPN4 1	04/03/2015	600	85200 - 85800 sec	600	0
1	1	First stage	1	OPN4 1	04/03/2015	600	85800 - 86400 sec	458	142
1	1	First stage	1	OPN4 1	04/03/2015	600	86400 - 87000 sec	600	0
1	1	First stage	1	OPN4 1	04/03/2015	600	87000 - 87600 sec	600	0
1	1	First stage	1	OPN4 1	04/03/2015	600	87600 - 88200 sec	600	0
1	1	First stage	1	OPN4 1	04/03/2015	600	88200 - 88800 sec	600	0
1	1	First stage	1	OPN4 1	04/03/2015	600	88800 - 89400 sec	600	0
1	1	First stage	1	OPN4 1	04/03/2015	600	89400 - 90000 sec	600	0
1	1	First stage	1	OPN4 1	04/03/2015	600	90000 - 90600 sec	600	0
1	1	First stage	1	OPN4 1	04/03/2015	600	90600 - 91200 sec	600	0
1	1	First stage	1	OPN4 1	04/03/2015	600	91200 - 91800 sec	600	0
1	1	First stage	1	OPN4 1	04/03/2015	600	91800 - 92400 sec	600	0
1	1	First stage	1	OPN4 1	04/03/2015	600	92400 - 93000 sec	600	0
1	1	First stage	1	OPN4 1	04/03/2015	600	93000 - 93600 sec	600	0
1	1	First stage	1	OPN4 1	04/03/2015	600	93600 - 94200 sec	542.6	57.4
1	1	First stage	1	OPN4 1	04/03/2015	600	94200 - 94800 sec	32	568
1	1	First stage	1	OPN4 1	04/03/2015	600	94800 - 95400 sec	0.5	599.5
1	1	First stage	1	OPN4 1	04/03/2015	600	95400 - 96000 sec	3.6	596.4
1	1	First stage	1	OPN4 1	04/03/2015	600	96000 - 96600 sec	29.6	570.4
1	1	First stage	1	OPN4 1	04/03/2015	600	96600 - 97200 sec	172.4	427.6
1	1	First stage	1	OPN4 1	04/03/2015	600	97200 - 97800 sec	600	0
1	1	First stage	1	OPN4 1	04/03/2015	600	97800 - 98400 sec	600	0
1	1	First stage	1	OPN4 1	04/03/2015	600	98400 - 99000 sec	600	0
1	1	First stage	1	OPN4 1	04/03/2015	600	99000 - 99600 sec	600	0
1	1	First stage	1	OPN4 1	04/03/2015	600	99600 - 100200 se	600	0
1	1	First stage	1	OPN4 1	04/03/2015	600	100200 - 100800 s	600	0
1	1	First stage	1	OPN4 1	04/03/2015	600	100800 - 101400 s	600	0
1	1	First stage	1	OPN4 1	04/03/2015	600	101400 - 102000 s	600	0
1	1	First stage	1	OPN4 1	04/03/2015	600	102000 - 102600 s	600	0
1	1	First stage	1	OPN4 1	04/03/2015	600	102600 - 103200 s	600	0
1	1	First stage	1	OPN4 1	04/03/2015	600	103200 - 103800 s	600	0
1	1	First stage	1	OPN4 1	04/03/2015	600	103800 - 104400 s	600	0
1	1	First stage	1	OPN4 1	04/03/2015	600	104400 - 105000 s	600	0
1	1	First stage	1	OPN4 1	04/03/2015	600	105000 - 105600 s	600	0
1	1	First stage	1	OPN4 1	04/03/2015	600	105600 - 106200 s	600	0
1	1	First stage	1	OPN4 1	04/03/2015	600	106200 - 106800 s	600	0
1	1	First stage	1	OPN4 1	04/03/2015	600	106800 - 107400 s	600	0
1	1	First stage	1	OPN4 1	04/03/2015	600	107400 - 108000 s	600	0
1	1	First stage	1	OPN4 1	04/03/2015	600	108000 - 108600 s	600	0
1	1	First stage	1	OPN4 1	04/03/2015	600	108600 - 109200 s	600	0
1	1	First stage	1	OPN4 1	04/03/2015	600	109200 - 109800 s	600	0
1	1	First stage	1	OPN4 1	04/03/2015	600	109800 - 110400 s	600	0
1	1	First stage	1	OPN4 1	04/03/2015	600	110400 - 111000 s	600	0
1	1	First stage	1	OPN4 1	04/03/2015	600	111000 - 111600 s	600	0
1	1	First stage	1	OPN4 1	04/03/2015	600	111600 - 112200 s	600	0
1	1	First stage	1	OPN4 1	04/03/2015	600	112200 - 112800 s	600	0
1	1	First stage	1	OPN4 1	04/03/2015	600	112800 - 113400 s	180.4	419.6
1	1	First stage	1	OPN4 1	04/03/2015	600	113400 - 114000 s	111.1	488.9
1	1	First stage	1	OPN4 1	04/03/2015	600	114000 - 114600 s	42.5	557.5
1	1	First stage	1	OPN4 1	04/03/2015	600	114600 - 115200 s	3.3	596.7
1	1	First stage	1	OPN4 1	04/03/2015	600	115200 - 115800 s	147.9	452.1
1	1	First stage	1	OPN4 1	04/03/2015	600	115800 - 116400 s	114.4	485.6
1	1	First stage	1	OPN4 1	04/03/2015	600	116400 - 117000 s	243	357
1	1	First stage	1	OPN4 1	04/03/2015	600	117000 - 117600 s	600	0
1	1	First stage	1	OPN4 1	04/03/2015	600	117600 - 118200 s	600	0
1	1	First stage	1	OPN4 1	04/03/2015	600	118200 - 118800 s	600	0
1	1	First stage	1	OPN4 1	04/03/2015	600	118800 - 119400 s	600	0
1	1	First stage	1	OPN4 1	04/03/2015	600	119400 - 120000 s	600	0
1	1	First stage	1	OPN4 1	04/03/2015	600	120000 - 120600 s	600	0
1	1	First stage	1	OPN4 1	04/03/2015	600	120600 - 121200 s	600	0
1	1	First stage	1	OPN4 1	04/03/2015	600	121200 - 121800 s	600	0
1	1	First stage	1	OPN4 1	04/03/2015	600	121800 - 122400 s	600	0
1	1	First stage	1	OPN4 1	04/03/2015	600	122400 - 123000 s	558.4	41.6
1	1	First stage	1	OPN4 1	04/03/2015	600	123000 - 123600 s	600	0
1	1	First stage	1	OPN4 1	04/03/2015	600	123600 - 124200 s	600	0
1	1	First stage	1	OPN4 1	04/03/2015	600	124200 - 124800 s	105.3	494.7
1	1	First stage	1	OPN4 1	04/03/2015	600	124800 - 125400 s	323.2	276.8
1	1	First stage	1	OPN4 1	04/03/2015	600	125400 - 126000 s	507.3	92.7
1	1	First stage	1	OPN4 1	04/03/2015	600	126000 - 126600 s	55.1	544.9
1	1	First stage	1	OPN4 1	04/03/2015	600	126600 - 127200 s	38.2	561.8
1	1	First stage	1	OPN4 1	04/03/2015	600	127200 - 127800 s	105.6	494.4
1	1	First stage	1	OPN4 1	04/03/2015	600	127800 - 128400 s	78.1	521.9
1	1	First stage	1	OPN4 1	04/03/2015	600	128400 - 129000 s	134	466
1	1	First stage	1	OPN4 1	04/03/2015	600	129000 - 129600 s	600	0
1	1	First stage	1	OPN4 1	04/03/2015	600	129600 - 130200 s	600	0
1	1	First stage	1	OPN4 1	04/03/2015	600	130200 - 130800 s	600	0
1	1	First stage	1	OPN4 1	04/03/2015	600	130800 - 131400 s	600	0
1	1	First stage	1	OPN4 1	04/03/2015	600	131400 - 132000 s	600	0
1	1	First stage	1	OPN4 1	04/03/2015	600	132000 - 132600 s	558.6	41.4
1	1	First stage	1	OPN4 1	04/03/2015	600	132600 - 133200 s	552.4	47.6
1	1	First stage	1	OPN4 1	04/03/2015	600	133200 - 133800 s	231.5	368.5
1	1	First stage	1	OPN4 1	04/03/2015	600	133800 - 134400 s	28.3	571.7
1	1	First stage	1	OPN4 1	04/03/2015	600	134400 - 135000 s	59.6	540.4
1	1	First stage	1	OPN4 1	04/03/2015	600	135000 - 135600 s	58.5	541.5
1	1	First stage	1	OPN4 1	04/03/2015	600	135600 - 136200 s	13.5	586.5
1	1	First stage	1	OPN4 1	04/03/2015	600	136200 - 136800 s	40.7	559.3
1	1	First stage	1	OPN4 1	04/03/2015	600	136800 - 137400 s	341.9	258.1
1	1	First stage	1	OPN4 1	04/03/2015	600	137400 - 138000 s	600	0
1	1	First stage	1	OPN4 1	04/03/2015	600	138000 - 138600 s	600	0
1	1	First stage	1	OPN4 1	04/03/2015	600	138600 - 139200 s	600	0
1	1	First stage	1	OPN4 1	04/03/2015	600	139200 - 139800 s	600	0
1	1	First stage	1	OPN4 1	04/03/2015	600	139800 - 140400 s	553.8	46.2
1	1	First stage	1	OPN4 1	04/03/2015	600	140400 - 141000 s	591.3	8.7
1	1	First stage	1	OPN4 1	04/03/2015	600	141000 - 141600 s	556.8	43.2
1	1	First stage	1	OPN4 1	04/03/2015	600	141600 - 142200 s	600	0
1	1	First stage	1	OPN4 1	04/03/2015	600	142200 - 142800 s	413.3	186.7
1	1	First stage	1	OPN4 1	04/03/2015	600	142800 - 143400 s	532.7	67.3
1	1	First stage	1	OPN4 1	04/03/2015	600	143400 - 144000 s	25.5	574.5
1	1	First stage	1	OPN4 1	04/03/2015	600	144000 - 144600 s	58.6	541.4
1	1	First stage	1	OPN4 1	04/03/2015	600	144600 - 145200 s	77.8	522.2
1	1	First stage	1	OPN4 1	04/03/2015	600	145200 - 145800 s	19.8	580.2
1	1	First stage	1	OPN4 1	04/03/2015	600	145800 - 146400 s	77.5	522.5
1	1	First stage	1	OPN4 1	04/03/2015	600	146400 - 147000 s	46.7	553.3
1	1	First stage	1	OPN4 1	04/03/2015	600	147000 - 147600 s	89.6	510.4
1	1	First stage	1	OPN4 1	04/03/2015	600	147600 - 148200 s	31.8	568.2
1	1	First stage	1	OPN4 1	04/03/2015	600	148200 - 148800 s	56	544
1	1	First stage	1	OPN4 1	04/03/2015	600	148800 - 149400 s	20	580
1	1	First stage	1	OPN4 1	04/03/2015	600	149400 - 150000 s	22.7	577.3
1	1	First stage	1	OPN4 1	04/03/2015	600	150000 - 150600 s	279.3	320.7
1	1	First stage	1	OPN4 1	04/03/2015	600	150600 - 151200 s	600	0
1	1	First stage	1	OPN4 1	04/03/2015	600	151200 - 151800 s	528.2	71.8
1	1	First stage	1	OPN4 1	04/03/2015	600	151800 - 152400 s	600	0
1	1	First stage	1	OPN4 1	04/03/2015	600	152400 - 153000 s	549.6	50.4
1	1	First stage	1	OPN4 1	04/03/2015	600	153000 - 153600 s	88.5	511.5
1	1	First stage	1	OPN4 1	04/03/2015	600	153600 - 154200 s	15.7	584.3
1	1	First stage	1	OPN4 1	04/03/2015	600	154200 - 154800 s	82	518
1	1	First stage	1	OPN4 1	04/03/2015	600	154800 - 155400 s	44	556
1	1	First stage	1	OPN4 1	04/03/2015	600	155400 - 156000 s	103.6	496.4
1	1	First stage	1	OPN4 1	04/03/2015	600	156000 - 156600 s	37.8	562.2
1	1	First stage	1	OPN4 1	04/03/2015	600	156600 - 157200 s	133.2	466.8
1	1	First stage	1	OPN4 1	04/03/2015	600	157200 - 157800 s	18.8	581.2
1	1	First stage	1	OPN4 1	04/03/2015	600	157800 - 158400 s	13	587
1	1	First stage	1	OPN4 1	04/03/2015	600	158400 - 159000 s	436.1	163.9
1	1	First stage	1	OPN4 1	04/03/2015	600	159000 - 159600 s	600	0
1	1	First stage	1	OPN4 1	04/03/2015	600	159600 - 160200 s	484.6	115.4
1	1	First stage	1	OPN4 1	04/03/2015	600	160200 - 160800 s	492.1	107.9
1	1	First stage	1	OPN4 1	04/03/2015	600	160800 - 161400 s	600	0
1	1	First stage	1	OPN4 1	04/03/2015	600	161400 - 162000 s	335.9	264.1
1	1	First stage	1	OPN4 1	04/03/2015	600	162000 - 162600 s	25.4	574.6
1	1	First stage	1	OPN4 1	04/03/2015	600	162600 - 163200 s	57.1	542.9
1	1	First stage	1	OPN4 1	04/03/2015	600	163200 - 163800 s	270.1	329.9
1	1	First stage	1	OPN4 1	04/03/2015	600	163800 - 164400 s	62.2	537.8
1	1	First stage	1	OPN4 1	04/03/2015	600	164400 - 165000 s	15.5	584.5
1	1	First stage	1	OPN4 1	04/03/2015	600	165000 - 165600 s	29.3	570.7
1	1	First stage	1	OPN4 1	04/03/2015	600	165600 - 166200 s	35.8	564.2
1	1	First stage	1	OPN4 1	04/03/2015	600	166200 - 166800 s	54.9	545.1
1	1	First stage	1	OPN4 1	04/03/2015	600	166800 - 167400 s	584.2	15.8
1	1	First stage	1	OPN4 1	04/03/2015	600	167400 - 168000 s	261.8	338.2
1	1	First stage	1	OPN4 1	04/03/2015	600	168000 - 168600 s	11.9	588.1
1	1	First stage	1	OPN4 1	04/03/2015	600	168600 - 169200 s	1.6	598.4
1	1	First stage	1	OPN4 1	04/03/2015	600	169200 - 169800 s	437.5	162.5
1	1	First stage	1	OPN4 1	04/03/2015	600	169800 - 170400 s	600	0
1	1	First stage	1	OPN4 1	04/03/2015	600	170400 - 171000 s	279.4	320.6
1	1	First stage	1	OPN4 1	04/03/2015	600	171000 - 171600 s	30.4	569.6
1	1	First stage	1	OPN4 1	04/03/2015	600	171600 - 172200 s	27.9	572.1
1	1	First stage	1	OPN4 1	04/03/2015	600	172200 - 172800 s	130.3	469.7
1	1	First stage	1	OPN4 1	04/03/2015	600	172800 - 173400 s	215.6	384.4
1	1	First stage	1	OPN4 1	04/03/2015	600	173400 - 174000 s	164.4	435.6
1	1	First stage	1	OPN4 1	04/03/2015	600	174000 - 174600 s	580.1	19.9
1	1	First stage	1	OPN4 1	04/03/2015	600	174600 - 175200 s	582	18
1	1	First stage	1	OPN4 1	04/03/2015	600	175200 - 175800 s	129.6	470.4
1	1	First stage	1	OPN4 1	04/03/2015	600	175800 - 176400 s	191.5	408.5
1	1	First stage	1	OPN4 1	04/03/2015	600	176400 - 177000 s	600	0
1	1	First stage	1	OPN4 1	04/03/2015	600	177000 - 177600 s	600	0
1	1	First stage	1	OPN4 1	04/03/2015	600	177600 - 178200 s	600	0
1	1	First stage	1	OPN4 1	04/03/2015	600	178200 - 178800 s	600	0
1	1	First stage	1	OPN4 1	04/03/2015	600	178800 - 179400 s	600	0
1	1	First stage	1	OPN4 1	04/03/2015	600	179400 - 180000 s	600	0
1	1	First stage	1	OPN4 1	04/03/2015	600	180000 - 180600 s	600	0
1	1	First stage	1	OPN4 1	04/03/2015	600	180600 - 181200 s	600	0
1	1	First stage	1	OPN4 1	04/03/2015	600	181200 - 181800 s	600	0
1	1	First stage	1	OPN4 1	04/03/2015	600	181800 - 182400 s	600	0
1	1	First stage	1	OPN4 1	04/03/2015	600	182400 - 183000 s	600	0
1	1	First stage	1	OPN4 1	04/03/2015	600	183000 - 183600 s	600	0
1	1	First stage	1	OPN4 1	04/03/2015	600	183600 - 184200 s	600	0
1	1	First stage	1	OPN4 1	04/03/2015	600	184200 - 184800 s	600	0
1	1	First stage	1	OPN4 1	04/03/2015	600	184800 - 185400 s	600	0
1	1	First stage	1	OPN4 1	04/03/2015	600	185400 - 186000 s	600	0
1	1	First stage	1	OPN4 1	04/03/2015	600	186000 - 186600 s	600	0
1	1	First stage	1	OPN4 1	04/03/2015	600	186600 - 187200 s	600	0
1	1	First stage	1	OPN4 1	04/03/2015	600	187200 - 187800 s	600	0
1	1	First stage	1	OPN4 1	04/03/2015	600	187800 - 188400 s	600	0
1	1	First stage	1	OPN4 1	04/03/2015	600	188400 - 189000 s	600	0
1	1	First stage	1	OPN4 1	04/03/2015	600	189000 - 189600 s	600	0
1	1	First stage	1	OPN4 1	04/03/2015	600	189600 - 190200 s	600	0
1	1	First stage	1	OPN4 1	04/03/2015	600	190200 - 190800 s	600	0
1	1	First stage	1	OPN4 1	04/03/2015	600	190800 - 191400 s	600	0
1	1	First stage	1	OPN4 1	04/03/2015	600	191400 - 192000 s	600	0
1	1	First stage	1	OPN4 1	04/03/2015	600	192000 - 192600 s	600	0
1	1	First stage	1	OPN4 1	04/03/2015	600	192600 - 193200 s	600	0
1	1	First stage	1	OPN4 1	04/03/2015	600	193200 - 193800 s	600	0
1	1	First stage	1	OPN4 1	04/03/2015	600	193800 - 194400 s	600	0
1	1	First stage	1	OPN4 1	04/03/2015	600	194400 - 195000 s	445.6	154.4
1	1	First stage	1	OPN4 1	04/03/2015	600	195000 - 195600 s	160.5	439.5
1	1	First stage	1	OPN4 1	04/03/2015	600	195600 - 196200 s	161.9	438.1
1	1	First stage	1	OPN4 1	04/03/2015	600	196200 - 196800 s	117.7	482.3
1	1	First stage	1	OPN4 1	04/03/2015	600	196800 - 197400 s	65.2	534.8
1	1	First stage	1	OPN4 1	04/03/2015	600	197400 - 198000 s	49.3	550.7
1	1	First stage	1	OPN4 1	04/03/2015	600	198000 - 198600 s	56.8	543.2
1	1	First stage	1	OPN4 1	04/03/2015	600	198600 - 199200 s	98.6	501.4
1	1	First stage	1	OPN4 1	04/03/2015	600	199200 - 199800 s	75.3	524.7
1	1	First stage	1	OPN4 1	04/03/2015	600	199800 - 200400 s	66.2	533.8
1	1	First stage	1	OPN4 1	04/03/2015	600	200400 - 201000 s	591.2	8.8
1	1	First stage	1	OPN4 1	04/03/2015	600	201000 - 201600 s	600	0
1	1	First stage	1	OPN4 1	04/03/2015	600	201600 - 202200 s	600	0
1	1	First stage	1	OPN4 1	04/03/2015	600	202200 - 202800 s	600	0
1	1	First stage	1	OPN4 1	04/03/2015	600	202800 - 203400 s	600	0
1	1	First stage	1	OPN4 1	04/03/2015	600	203400 - 204000 s	222.6	377.4
1	1	First stage	1	OPN4 1	04/03/2015	600	204000 - 204600 s	1	599
1	1	First stage	1	OPN4 1	04/03/2015	600	204600 - 205200 s	184.5	415.5
1	1	First stage	1	OPN4 1	04/03/2015	600	205200 - 205800 s	108.4	491.6
1	1	First stage	1	OPN4 1	04/03/2015	600	205800 - 206400 s	349.3	250.7
1	1	First stage	1	OPN4 1	04/03/2015	600	206400 - 207000 s	501.8	98.2
1	1	First stage	1	OPN4 1	04/03/2015	600	207000 - 207600 s	490	110
1	1	First stage	1	OPN4 1	04/03/2015	600	207600 - 208200 s	600	0
1	1	First stage	1	OPN4 1	04/03/2015	600	208200 - 208800 s	600	0
1	1	First stage	1	OPN4 1	04/03/2015	600	208800 - 209400 s	332.8	267.2
1	1	First stage	1	OPN4 1	04/03/2015	600	209400 - 210000 s	126.1	473.9
1	1	First stage	1	OPN4 1	04/03/2015	600	210000 - 210600 s	51	549
1	1	First stage	1	OPN4 1	04/03/2015	600	210600 - 211200 s	85.7	514.3
1	1	First stage	1	OPN4 1	04/03/2015	600	211200 - 211800 s	186.5	413.5
1	1	First stage	1	OPN4 1	04/03/2015	600	211800 - 212400 s	600	0
1	1	First stage	1	OPN4 1	04/03/2015	600	212400 - 213000 s	600	0
1	1	First stage	1	OPN4 1	04/03/2015	600	213000 - 213600 s	600	0
1	1	First stage	1	OPN4 1	04/03/2015	600	213600 - 214200 s	600	0
1	1	First stage	1	OPN4 1	04/03/2015	600	214200 - 214800 s	594.6	5.4
1	1	First stage	1	OPN4 1	04/03/2015	600	214800 - 215400 s	206.1	393.9
1	1	First stage	1	OPN4 1	04/03/2015	600	215400 - 216000 s	130.4	469.6
2	2	First stage	1	OPN4 2	04/03/2015	600	0 - 600 secs.	600	0
2	2	First stage	1	OPN4 2	04/03/2015	600	600 - 1200 secs.	600	0
2	2	First stage	1	OPN4 2	04/03/2015	600	1200 - 1800 secs.	600	0
2	2	First stage	1	OPN4 2	04/03/2015	600	1800 - 2400 secs.	600	0
2	2	First stage	1	OPN4 2	04/03/2015	600	2400 - 3000 secs.	600	0
2	2	First stage	1	OPN4 2	04/03/2015	600	3000 - 3600 secs.	600	0
2	2	First stage	1	OPN4 2	04/03/2015	600	3600 - 4200 secs.	600	0
2	2	First stage	1	OPN4 2	04/03/2015	600	4200 - 4800 secs.	600	0
2	2	First stage	1	OPN4 2	04/03/2015	600	4800 - 5400 secs.	516.6	83.4
2	2	First stage	1	OPN4 2	04/03/2015	600	5400 - 6000 secs.	600	0
2	2	First stage	1	OPN4 2	04/03/2015	600	6000 - 6600 secs.	600	0
2	2	First stage	1	OPN4 2	04/03/2015	600	6600 - 7200 secs.	515	85
2	2	First stage	1	OPN4 2	04/03/2015	600	7200 - 7800 secs.	600	0
2	2	First stage	1	OPN4 2	04/03/2015	600	7800 - 8400 secs.	600	0
2	2	First stage	1	OPN4 2	04/03/2015	600	8400 - 9000 secs.	600	0
2	2	First stage	1	OPN4 2	04/03/2015	600	9000 - 9600 secs.	600	0
2	2	First stage	1	OPN4 2	04/03/2015	600	9600 - 10200 secs	600	0
2	2	First stage	1	OPN4 2	04/03/2015	600	10200 - 10800 sec	545.5	54.5
2	2	First stage	1	OPN4 2	04/03/2015	600	10800 - 11400 sec	57.3	542.7
2	2	First stage	1	OPN4 2	04/03/2015	600	11400 - 12000 sec	16.5	583.5
2	2	First stage	1	OPN4 2	04/03/2015	600	12000 - 12600 sec	130.5	469.5
2	2	First stage	1	OPN4 2	04/03/2015	600	12600 - 13200 sec	503	97
2	2	First stage	1	OPN4 2	04/03/2015	600	13200 - 13800 sec	597.1	2.9
2	2	First stage	1	OPN4 2	04/03/2015	600	13800 - 14400 sec	7.3	592.7
2	2	First stage	1	OPN4 2	04/03/2015	600	14400 - 15000 sec	4.2	595.8
2	2	First stage	1	OPN4 2	04/03/2015	600	15000 - 15600 sec	509.8	90.2
2	2	First stage	1	OPN4 2	04/03/2015	600	15600 - 16200 sec	557.9	42.1
2	2	First stage	1	OPN4 2	04/03/2015	600	16200 - 16800 sec	600	0
2	2	First stage	1	OPN4 2	04/03/2015	600	16800 - 17400 sec	600	0
2	2	First stage	1	OPN4 2	04/03/2015	600	17400 - 18000 sec	600	0
2	2	First stage	1	OPN4 2	04/03/2015	600	18000 - 18600 sec	600	0
2	2	First stage	1	OPN4 2	04/03/2015	600	18600 - 19200 sec	600	0
2	2	First stage	1	OPN4 2	04/03/2015	600	19200 - 19800 sec	193.5	406.5
2	2	First stage	1	OPN4 2	04/03/2015	600	19800 - 20400 sec	9.5	590.5
2	2	First stage	1	OPN4 2	04/03/2015	600	20400 - 21000 sec	110.8	489.2
2	2	First stage	1	OPN4 2	04/03/2015	600	21000 - 21600 sec	25	575
2	2	First stage	1	OPN4 2	04/03/2015	600	21600 - 22200 sec	122.7	477.3
2	2	First stage	1	OPN4 2	04/03/2015	600	22200 - 22800 sec	600	0
2	2	First stage	1	OPN4 2	04/03/2015	600	22800 - 23400 sec	286.2	313.8
2	2	First stage	1	OPN4 2	04/03/2015	600	23400 - 24000 sec	4.1	595.9
2	2	First stage	1	OPN4 2	04/03/2015	600	24000 - 24600 sec	66.9	533.1
2	2	First stage	1	OPN4 2	04/03/2015	600	24600 - 25200 sec	78.2	521.8
2	2	First stage	1	OPN4 2	04/03/2015	600	25800 - 26400 sec	600	0
2	2	First stage	1	OPN4 2	04/03/2015	600	26400 - 27000 sec	600	0
2	2	First stage	1	OPN4 2	04/03/2015	600	27000 - 27600 sec	600	0
2	2	First stage	1	OPN4 2	04/03/2015	600	27600 - 28200 sec	600	0
2	2	First stage	1	OPN4 2	04/03/2015	600	28200 - 28800 sec	77.6	522.4
2	2	First stage	1	OPN4 2	04/03/2015	600	28800 - 29400 sec	41.2	558.8
2	2	First stage	1	OPN4 2	04/03/2015	600	29400 - 30000 sec	14.6	585.4
2	2	First stage	1	OPN4 2	04/03/2015	600	30000 - 30600 sec	133.5	466.5
2	2	First stage	1	OPN4 2	04/03/2015	600	30600 - 31200 sec	19.6	580.4
2	2	First stage	1	OPN4 2	04/03/2015	600	31200 - 31800 sec	600	0
2	2	First stage	1	OPN4 2	04/03/2015	600	31800 - 32400 sec	470.1	129.9
2	2	First stage	1	OPN4 2	04/03/2015	600	32400 - 33000 sec	7.3	592.7
2	2	First stage	1	OPN4 2	04/03/2015	600	33000 - 33600 sec	40	560
2	2	First stage	1	OPN4 2	04/03/2015	600	33600 - 34200 sec	21.3	578.7
2	2	First stage	1	OPN4 2	04/03/2015	600	34200 - 34800 sec	27.2	572.8
2	2	First stage	1	OPN4 2	04/03/2015	600	34800 - 35400 sec	600	0
2	2	First stage	1	OPN4 2	04/03/2015	600	35400 - 36000 sec	600	0
2	2	First stage	1	OPN4 2	04/03/2015	600	36000 - 36600 sec	145.5	454.5
2	2	First stage	1	OPN4 2	04/03/2015	600	36600 - 37200 sec	33.6	566.4
2	2	First stage	1	OPN4 2	04/03/2015	600	37200 - 37800 sec	227.8	372.2
2	2	First stage	1	OPN4 2	04/03/2015	600	37800 - 38400 sec	600	0
2	2	First stage	1	OPN4 2	04/03/2015	600	38400 - 39000 sec	520.3	79.7
2	2	First stage	1	OPN4 2	04/03/2015	600	39000 - 39600 sec	600	0
2	2	First stage	1	OPN4 2	04/03/2015	600	39600 - 40200 sec	103.4	496.6
2	2	First stage	1	OPN4 2	04/03/2015	600	40200 - 40800 sec	66	534
2	2	First stage	1	OPN4 2	04/03/2015	600	40800 - 41400 sec	115.7	484.3
2	2	First stage	1	OPN4 2	04/03/2015	600	41400 - 42000 sec	47.5	552.5
2	2	First stage	1	OPN4 2	04/03/2015	600	42000 - 42600 sec	376.6	223.4
2	2	First stage	1	OPN4 2	04/03/2015	600	42600 - 43200 sec	600	0
2	2	First stage	1	OPN4 2	04/03/2015	600	43200 - 43800 sec	532.7	67.3
2	2	First stage	1	OPN4 2	04/03/2015	600	43800 - 44400 sec	289.8	310.2
2	2	First stage	1	OPN4 2	04/03/2015	600	44400 - 45000 sec	6.8	593.2
2	2	First stage	1	OPN4 2	04/03/2015	600	45000 - 45600 sec	5.2	594.8
2	2	First stage	1	OPN4 2	04/03/2015	600	45600 - 46200 sec	21.6	578.4
2	2	First stage	1	OPN4 2	04/03/2015	600	46200 - 46800 sec	16.2	583.8
2	2	First stage	1	OPN4 2	04/03/2015	600	46800 - 47400 sec	99.8	500.2
2	2	First stage	1	OPN4 2	04/03/2015	600	47400 - 48000 sec	7.9	592.1
2	2	First stage	1	OPN4 2	04/03/2015	600	48000 - 48600 sec	52	548
2	2	First stage	1	OPN4 2	04/03/2015	600	48600 - 49200 sec	0.5	599.5
2	2	First stage	1	OPN4 2	04/03/2015	600	49200 - 49800 sec	74.9	525.1
2	2	First stage	1	OPN4 2	04/03/2015	600	49800 - 50400 sec	330.5	269.5
2	2	First stage	1	OPN4 2	04/03/2015	600	50400 - 51000 sec	7	593
2	2	First stage	1	OPN4 2	04/03/2015	600	51000 - 51600 sec	15.3	584.7
2	2	First stage	1	OPN4 2	04/03/2015	600	51600 - 52200 sec	21.5	578.5
2	2	First stage	1	OPN4 2	04/03/2015	600	52200 - 52800 sec	12	588
2	2	First stage	1	OPN4 2	04/03/2015	600	52800 - 53400 sec	62.4	537.6
2	2	First stage	1	OPN4 2	04/03/2015	600	53400 - 54000 sec	246.5	353.5
2	2	First stage	1	OPN4 2	04/03/2015	600	54000 - 54600 sec	10.9	589.1
2	2	First stage	1	OPN4 2	04/03/2015	600	54600 - 55200 sec	43.7	556.3
2	2	First stage	1	OPN4 2	04/03/2015	600	55200 - 55800 sec	41.1	558.9
2	2	First stage	1	OPN4 2	04/03/2015	600	55800 - 56400 sec	39.6	560.4
2	2	First stage	1	OPN4 2	04/03/2015	600	56400 - 57000 sec	6.2	593.8
2	2	First stage	1	OPN4 2	04/03/2015	600	57000 - 57600 sec	41.6	558.4
2	2	First stage	1	OPN4 2	04/03/2015	600	57600 - 58200 sec	244	356
2	2	First stage	1	OPN4 2	04/03/2015	600	58200 - 58800 sec	436.2	163.8
2	2	First stage	1	OPN4 2	04/03/2015	600	58800 - 59400 sec	489.5	110.5
2	2	First stage	1	OPN4 2	04/03/2015	600	59400 - 60000 sec	400.4	199.6
2	2	First stage	1	OPN4 2	04/03/2015	600	60000 - 60600 sec	37.7	562.3
2	2	First stage	1	OPN4 2	04/03/2015	600	60600 - 61200 sec	35.5	564.5
2	2	First stage	1	OPN4 2	04/03/2015	600	61200 - 61800 sec	59.4	540.6
2	2	First stage	1	OPN4 2	04/03/2015	600	61800 - 62400 sec	57.8	542.2
2	2	First stage	1	OPN4 2	04/03/2015	600	62400 - 63000 sec	0.5	599.5
2	2	First stage	1	OPN4 2	04/03/2015	600	63000 - 63600 sec	46.1	553.9
2	2	First stage	1	OPN4 2	04/03/2015	600	63600 - 64200 sec	85.8	514.2
2	2	First stage	1	OPN4 2	04/03/2015	600	64200 - 64800 sec	32.2	567.8
2	2	First stage	1	OPN4 2	04/03/2015	600	64800 - 65400 sec	0.5	599.5
2	2	First stage	1	OPN4 2	04/03/2015	600	65400 - 66000 sec	45.2	554.8
2	2	First stage	1	OPN4 2	04/03/2015	600	66000 - 66600 sec	0	600
2	2	First stage	1	OPN4 2	04/03/2015	600	66600 - 67200 sec	1	599
2	2	First stage	1	OPN4 2	04/03/2015	600	67200 - 67800 sec	0	600
2	2	First stage	1	OPN4 2	04/03/2015	600	67800 - 68400 sec	572	28
2	2	First stage	1	OPN4 2	04/03/2015	600	68400 - 69000 sec	600	0
2	2	First stage	1	OPN4 2	04/03/2015	600	69000 - 69600 sec	512.9	87.1
2	2	First stage	1	OPN4 2	04/03/2015	600	69600 - 70200 sec	0	600
2	2	First stage	1	OPN4 2	04/03/2015	600	70200 - 70800 sec	17.2	582.8
2	2	First stage	1	OPN4 2	04/03/2015	600	70800 - 71400 sec	63.8	536.2
2	2	First stage	1	OPN4 2	04/03/2015	600	71400 - 72000 sec	425.8	174.2
2	2	First stage	1	OPN4 2	04/03/2015	600	72000 - 72600 sec	600	0
2	2	First stage	1	OPN4 2	04/03/2015	600	72600 - 73200 sec	600	0
2	2	First stage	1	OPN4 2	04/03/2015	600	73200 - 73800 sec	555.2	44.8
2	2	First stage	1	OPN4 2	04/03/2015	600	73800 - 74400 sec	363.9	236.1
2	2	First stage	1	OPN4 2	04/03/2015	600	74400 - 75000 sec	5.8	594.2
2	2	First stage	1	OPN4 2	04/03/2015	600	75000 - 75600 sec	83.7	516.3
2	2	First stage	1	OPN4 2	04/03/2015	600	75600 - 76200 sec	20.8	579.2
2	2	First stage	1	OPN4 2	04/03/2015	600	76200 - 76800 sec	40.8	559.2
2	2	First stage	1	OPN4 2	04/03/2015	600	76800 - 77400 sec	103.9	496.1
2	2	First stage	1	OPN4 2	04/03/2015	600	77400 - 78000 sec	5.7	594.3
2	2	First stage	1	OPN4 2	04/03/2015	600	78000 - 78600 sec	48.6	551.4
2	2	First stage	1	OPN4 2	04/03/2015	600	78600 - 79200 sec	13	587
2	2	First stage	1	OPN4 2	04/03/2015	600	79200 - 79800 sec	8.5	591.5
2	2	First stage	1	OPN4 2	04/03/2015	600	79800 - 80400 sec	600	0
2	2	First stage	1	OPN4 2	04/03/2015	600	80400 - 81000 sec	600	0
2	2	First stage	1	OPN4 2	04/03/2015	600	81000 - 81600 sec	519.4	80.6
2	2	First stage	1	OPN4 2	04/03/2015	600	81600 - 82200 sec	64.6	535.4
2	2	First stage	1	OPN4 2	04/03/2015	600	82200 - 82800 sec	1	599
2	2	First stage	1	OPN4 2	04/03/2015	600	82800 - 83400 sec	19.6	580.4
2	2	First stage	1	OPN4 2	04/03/2015	600	83400 - 84000 sec	37.9	562.1
2	2	First stage	1	OPN4 2	04/03/2015	600	84000 - 84600 sec	42.1	557.9
2	2	First stage	1	OPN4 2	04/03/2015	600	84600 - 85200 sec	67.6	532.4
2	2	First stage	1	OPN4 2	04/03/2015	600	85200 - 85800 sec	230.7	369.3
2	2	First stage	1	OPN4 2	04/03/2015	600	85800 - 86400 sec	591.9	8.1
2	2	First stage	1	OPN4 2	04/03/2015	600	86400 - 87000 sec	550.5	49.5
2	2	First stage	1	OPN4 2	04/03/2015	600	87000 - 87600 sec	600	0
2	2	First stage	1	OPN4 2	04/03/2015	600	87600 - 88200 sec	600	0
2	2	First stage	1	OPN4 2	04/03/2015	600	88200 - 88800 sec	600	0
2	2	First stage	1	OPN4 2	04/03/2015	600	88800 - 89400 sec	600	0
2	2	First stage	1	OPN4 2	04/03/2015	600	89400 - 90000 sec	600	0
2	2	First stage	1	OPN4 2	04/03/2015	600	90000 - 90600 sec	600	0
2	2	First stage	1	OPN4 2	04/03/2015	600	90600 - 91200 sec	529.1	70.9
2	2	First stage	1	OPN4 2	04/03/2015	600	91200 - 91800 sec	600	0
2	2	First stage	1	OPN4 2	04/03/2015	600	91800 - 92400 sec	510.3	89.7
2	2	First stage	1	OPN4 2	04/03/2015	600	92400 - 93000 sec	597.6	2.4
2	2	First stage	1	OPN4 2	04/03/2015	600	93000 - 93600 sec	542.8	57.2
2	2	First stage	1	OPN4 2	04/03/2015	600	93600 - 94200 sec	600	0
2	2	First stage	1	OPN4 2	04/03/2015	600	94200 - 94800 sec	600	0
2	2	First stage	1	OPN4 2	04/03/2015	600	94800 - 95400 sec	260.7	339.3
2	2	First stage	1	OPN4 2	04/03/2015	600	95400 - 96000 sec	10.4	589.6
2	2	First stage	1	OPN4 2	04/03/2015	600	96000 - 96600 sec	0	600
2	2	First stage	1	OPN4 2	04/03/2015	600	96600 - 97200 sec	28.6	571.4
2	2	First stage	1	OPN4 2	04/03/2015	600	97200 - 97800 sec	382.6	217.4
2	2	First stage	1	OPN4 2	04/03/2015	600	97800 - 98400 sec	600	0
2	2	First stage	1	OPN4 2	04/03/2015	600	98400 - 99000 sec	450	150
2	2	First stage	1	OPN4 2	04/03/2015	600	99000 - 99600 sec	600	0
2	2	First stage	1	OPN4 2	04/03/2015	600	99600 - 100200 se	600	0
2	2	First stage	1	OPN4 2	04/03/2015	600	100200 - 100800 s	600	0
2	2	First stage	1	OPN4 2	04/03/2015	600	100800 - 101400 s	600	0
2	2	First stage	1	OPN4 2	04/03/2015	600	101400 - 102000 s	600	0
2	2	First stage	1	OPN4 2	04/03/2015	600	102000 - 102600 s	600	0
2	2	First stage	1	OPN4 2	04/03/2015	600	102600 - 103200 s	488.4	111.6
2	2	First stage	1	OPN4 2	04/03/2015	600	103200 - 103800 s	390.8	209.2
2	2	First stage	1	OPN4 2	04/03/2015	600	103800 - 104400 s	104.9	495.1
2	2	First stage	1	OPN4 2	04/03/2015	600	104400 - 105000 s	16.6	583.4
2	2	First stage	1	OPN4 2	04/03/2015	600	105000 - 105600 s	68.2	531.8
2	2	First stage	1	OPN4 2	04/03/2015	600	105600 - 106200 s	403.1	196.9
2	2	First stage	1	OPN4 2	04/03/2015	600	106200 - 106800 s	36.2	563.8
2	2	First stage	1	OPN4 2	04/03/2015	600	106800 - 107400 s	394	206
2	2	First stage	1	OPN4 2	04/03/2015	600	107400 - 108000 s	600	0
2	2	First stage	1	OPN4 2	04/03/2015	600	108000 - 108600 s	600	0
2	2	First stage	1	OPN4 2	04/03/2015	600	108600 - 109200 s	600	0
2	2	First stage	1	OPN4 2	04/03/2015	600	109200 - 109800 s	600	0
2	2	First stage	1	OPN4 2	04/03/2015	600	109800 - 110400 s	537.3	62.7
2	2	First stage	1	OPN4 2	04/03/2015	600	110400 - 111000 s	148.1	451.9
2	2	First stage	1	OPN4 2	04/03/2015	600	111000 - 111600 s	33.8	566.2
2	2	First stage	1	OPN4 2	04/03/2015	600	111600 - 112200 s	243.8	356.2
2	2	First stage	1	OPN4 2	04/03/2015	600	112200 - 112800 s	366.7	233.3
2	2	First stage	1	OPN4 2	04/03/2015	600	112800 - 113400 s	24.1	575.9
2	2	First stage	1	OPN4 2	04/03/2015	600	113400 - 114000 s	28.3	571.7
2	2	First stage	1	OPN4 2	04/03/2015	600	114000 - 114600 s	69	531
2	2	First stage	1	OPN4 2	04/03/2015	600	114600 - 115200 s	97.9	502.1
2	2	First stage	1	OPN4 2	04/03/2015	600	115200 - 115800 s	248.8	351.2
2	2	First stage	1	OPN4 2	04/03/2015	600	115800 - 116400 s	600	0
2	2	First stage	1	OPN4 2	04/03/2015	600	116400 - 117000 s	600	0
2	2	First stage	1	OPN4 2	04/03/2015	600	117000 - 117600 s	600	0
2	2	First stage	1	OPN4 2	04/03/2015	600	117600 - 118200 s	549.3	50.7
2	2	First stage	1	OPN4 2	04/03/2015	600	118200 - 118800 s	600	0
2	2	First stage	1	OPN4 2	04/03/2015	600	118800 - 119400 s	600	0
2	2	First stage	1	OPN4 2	04/03/2015	600	119400 - 120000 s	212.1	387.9
2	2	First stage	1	OPN4 2	04/03/2015	600	120000 - 120600 s	157.6	442.4
2	2	First stage	1	OPN4 2	04/03/2015	600	120600 - 121200 s	120.7	479.3
2	2	First stage	1	OPN4 2	04/03/2015	600	121200 - 121800 s	600	0
2	2	First stage	1	OPN4 2	04/03/2015	600	121800 - 122400 s	397.2	202.8
2	2	First stage	1	OPN4 2	04/03/2015	600	122400 - 123000 s	600	0
2	2	First stage	1	OPN4 2	04/03/2015	600	123000 - 123600 s	516.5	83.5
2	2	First stage	1	OPN4 2	04/03/2015	600	123600 - 124200 s	600	0
2	2	First stage	1	OPN4 2	04/03/2015	600	124200 - 124800 s	552.2	47.8
2	2	First stage	1	OPN4 2	04/03/2015	600	124800 - 125400 s	234.8	365.2
2	2	First stage	1	OPN4 2	04/03/2015	600	125400 - 126000 s	15.6	584.4
2	2	First stage	1	OPN4 2	04/03/2015	600	126000 - 126600 s	46.9	553.1
2	2	First stage	1	OPN4 2	04/03/2015	600	126600 - 127200 s	31.8	568.2
2	2	First stage	1	OPN4 2	04/03/2015	600	127200 - 127800 s	1	599
2	2	First stage	1	OPN4 2	04/03/2015	600	127800 - 128400 s	593.6	6.4
2	2	First stage	1	OPN4 2	04/03/2015	600	128400 - 129000 s	600	0
2	2	First stage	1	OPN4 2	04/03/2015	600	129000 - 129600 s	392.2	207.8
2	2	First stage	1	OPN4 2	04/03/2015	600	129600 - 130200 s	16.1	583.9
2	2	First stage	1	OPN4 2	04/03/2015	600	130200 - 130800 s	2.2	597.8
2	2	First stage	1	OPN4 2	04/03/2015	600	130800 - 131400 s	0.5	599.5
2	2	First stage	1	OPN4 2	04/03/2015	600	131400 - 132000 s	20.5	579.5
2	2	First stage	1	OPN4 2	04/03/2015	600	132000 - 132600 s	56.7	543.3
2	2	First stage	1	OPN4 2	04/03/2015	600	132600 - 133200 s	457	143
2	2	First stage	1	OPN4 2	04/03/2015	600	133200 - 133800 s	8	592
2	2	First stage	1	OPN4 2	04/03/2015	600	133800 - 134400 s	44.2	555.8
2	2	First stage	1	OPN4 2	04/03/2015	600	134400 - 135000 s	6.2	593.8
2	2	First stage	1	OPN4 2	04/03/2015	600	135000 - 135600 s	70.8	529.2
2	2	First stage	1	OPN4 2	04/03/2015	600	135600 - 136200 s	132.3	467.7
2	2	First stage	1	OPN4 2	04/03/2015	600	136200 - 136800 s	14.2	585.8
2	2	First stage	1	OPN4 2	04/03/2015	600	136800 - 137400 s	17.8	582.2
2	2	First stage	1	OPN4 2	04/03/2015	600	137400 - 138000 s	303.7	296.3
2	2	First stage	1	OPN4 2	04/03/2015	600	138000 - 138600 s	38.6	561.4
2	2	First stage	1	OPN4 2	04/03/2015	600	138600 - 139200 s	15.2	584.8
2	2	First stage	1	OPN4 2	04/03/2015	600	139200 - 139800 s	30.3	569.7
2	2	First stage	1	OPN4 2	04/03/2015	600	139800 - 140400 s	59.4	540.6
2	2	First stage	1	OPN4 2	04/03/2015	600	140400 - 141000 s	27.3	572.7
2	2	First stage	1	OPN4 2	04/03/2015	600	141000 - 141600 s	0	600
2	2	First stage	1	OPN4 2	04/03/2015	600	141600 - 142200 s	0.5	599.5
2	2	First stage	1	OPN4 2	04/03/2015	600	142200 - 142800 s	445.4	154.6
2	2	First stage	1	OPN4 2	04/03/2015	600	142800 - 143400 s	600	0
2	2	First stage	1	OPN4 2	04/03/2015	600	143400 - 144000 s	504.8	95.2
2	2	First stage	1	OPN4 2	04/03/2015	600	144000 - 144600 s	600	0
2	2	First stage	1	OPN4 2	04/03/2015	600	144600 - 145200 s	600	0
2	2	First stage	1	OPN4 2	04/03/2015	600	145200 - 145800 s	600	0
2	2	First stage	1	OPN4 2	04/03/2015	600	145800 - 146400 s	596.9	3.1
2	2	First stage	1	OPN4 2	04/03/2015	600	146400 - 147000 s	505.7	94.3
2	2	First stage	1	OPN4 2	04/03/2015	600	147000 - 147600 s	567.2	32.8
2	2	First stage	1	OPN4 2	04/03/2015	600	147600 - 148200 s	530.3	69.7
2	2	First stage	1	OPN4 2	04/03/2015	600	148200 - 148800 s	249.8	350.2
2	2	First stage	1	OPN4 2	04/03/2015	600	148800 - 149400 s	53	547
2	2	First stage	1	OPN4 2	04/03/2015	600	149400 - 150000 s	13.8	586.2
2	2	First stage	1	OPN4 2	04/03/2015	600	150000 - 150600 s	45.8	554.2
2	2	First stage	1	OPN4 2	04/03/2015	600	150600 - 151200 s	2.1	597.9
2	2	First stage	1	OPN4 2	04/03/2015	600	151200 - 151800 s	85.6	514.4
2	2	First stage	1	OPN4 2	04/03/2015	600	151800 - 152400 s	264.2	335.8
2	2	First stage	1	OPN4 2	04/03/2015	600	152400 - 153000 s	425.3	174.7
2	2	First stage	1	OPN4 2	04/03/2015	600	153000 - 153600 s	87.4	512.6
2	2	First stage	1	OPN4 2	04/03/2015	600	153600 - 154200 s	1	599
2	2	First stage	1	OPN4 2	04/03/2015	600	154200 - 154800 s	35.5	564.5
2	2	First stage	1	OPN4 2	04/03/2015	600	154800 - 155400 s	130.4	469.6
2	2	First stage	1	OPN4 2	04/03/2015	600	155400 - 156000 s	24.4	575.6
2	2	First stage	1	OPN4 2	04/03/2015	600	156000 - 156600 s	13.1	586.9
2	2	First stage	1	OPN4 2	04/03/2015	600	156600 - 157200 s	54.7	545.3
2	2	First stage	1	OPN4 2	04/03/2015	600	157200 - 157800 s	47.2	552.8
2	2	First stage	1	OPN4 2	04/03/2015	600	157800 - 158400 s	15.1	584.9
2	2	First stage	1	OPN4 2	04/03/2015	600	158400 - 159000 s	23	577
2	2	First stage	1	OPN4 2	04/03/2015	600	159000 - 159600 s	358	242
2	2	First stage	1	OPN4 2	04/03/2015	600	159600 - 160200 s	38.4	561.6
2	2	First stage	1	OPN4 2	04/03/2015	600	160200 - 160800 s	0.5	599.5
2	2	First stage	1	OPN4 2	04/03/2015	600	160800 - 161400 s	23.7	576.3
2	2	First stage	1	OPN4 2	04/03/2015	600	161400 - 162000 s	0	600
2	2	First stage	1	OPN4 2	04/03/2015	600	162000 - 162600 s	288.3	311.7
2	2	First stage	1	OPN4 2	04/03/2015	600	162600 - 163200 s	519.7	80.3
2	2	First stage	1	OPN4 2	04/03/2015	600	163200 - 163800 s	557.5	42.5
2	2	First stage	1	OPN4 2	04/03/2015	600	163800 - 164400 s	600	0
2	2	First stage	1	OPN4 2	04/03/2015	600	164400 - 165000 s	167.5	432.5
2	2	First stage	1	OPN4 2	04/03/2015	600	165000 - 165600 s	28.9	571.1
2	2	First stage	1	OPN4 2	04/03/2015	600	165600 - 166200 s	45.9	554.1
2	2	First stage	1	OPN4 2	04/03/2015	600	166200 - 166800 s	83.6	516.4
2	2	First stage	1	OPN4 2	04/03/2015	600	166800 - 167400 s	101.9	498.1
2	2	First stage	1	OPN4 2	04/03/2015	600	167400 - 168000 s	88.4	511.6
2	2	First stage	1	OPN4 2	04/03/2015	600	168000 - 168600 s	33.4	566.6
2	2	First stage	1	OPN4 2	04/03/2015	600	168600 - 169200 s	465.6	134.4
2	2	First stage	1	OPN4 2	04/03/2015	600	169200 - 169800 s	480.7	119.3
2	2	First stage	1	OPN4 2	04/03/2015	600	169800 - 170400 s	70.7	529.3
2	2	First stage	1	OPN4 2	04/03/2015	600	170400 - 171000 s	11.5	588.5
2	2	First stage	1	OPN4 2	04/03/2015	600	171000 - 171600 s	70.6	529.4
2	2	First stage	1	OPN4 2	04/03/2015	600	171600 - 172200 s	47.3	552.7
2	2	First stage	1	OPN4 2	04/03/2015	600	172200 - 172800 s	361.4	238.6
2	2	First stage	1	OPN4 2	04/03/2015	600	172800 - 173400 s	583.8	16.2
2	2	First stage	1	OPN4 2	04/03/2015	600	173400 - 174000 s	600	0
2	2	First stage	1	OPN4 2	04/03/2015	600	174000 - 174600 s	277.9	322.1
2	2	First stage	1	OPN4 2	04/03/2015	600	174600 - 175200 s	53.8	546.2
2	2	First stage	1	OPN4 2	04/03/2015	600	175200 - 175800 s	477.9	122.1
2	2	First stage	1	OPN4 2	04/03/2015	600	175800 - 176400 s	600	0
2	2	First stage	1	OPN4 2	04/03/2015	600	176400 - 177000 s	600	0
2	2	First stage	1	OPN4 2	04/03/2015	600	177000 - 177600 s	600	0
2	2	First stage	1	OPN4 2	04/03/2015	600	177600 - 178200 s	553.3	46.7
2	2	First stage	1	OPN4 2	04/03/2015	600	178200 - 178800 s	600	0
2	2	First stage	1	OPN4 2	04/03/2015	600	178800 - 179400 s	600	0
2	2	First stage	1	OPN4 2	04/03/2015	600	179400 - 180000 s	600	0
2	2	First stage	1	OPN4 2	04/03/2015	600	180000 - 180600 s	600	0
2	2	First stage	1	OPN4 2	04/03/2015	600	180600 - 181200 s	600	0
2	2	First stage	1	OPN4 2	04/03/2015	600	181200 - 181800 s	557.6	42.4
2	2	First stage	1	OPN4 2	04/03/2015	600	181800 - 182400 s	600	0
2	2	First stage	1	OPN4 2	04/03/2015	600	182400 - 183000 s	600	0
2	2	First stage	1	OPN4 2	04/03/2015	600	183000 - 183600 s	600	0
2	2	First stage	1	OPN4 2	04/03/2015	600	183600 - 184200 s	600	0
2	2	First stage	1	OPN4 2	04/03/2015	600	184200 - 184800 s	510.3	89.7
2	2	First stage	1	OPN4 2	04/03/2015	600	184800 - 185400 s	600	0
2	2	First stage	1	OPN4 2	04/03/2015	600	185400 - 186000 s	600	0
2	2	First stage	1	OPN4 2	04/03/2015	600	186000 - 186600 s	600	0
2	2	First stage	1	OPN4 2	04/03/2015	600	186600 - 187200 s	600	0
2	2	First stage	1	OPN4 2	04/03/2015	600	187200 - 187800 s	600	0
2	2	First stage	1	OPN4 2	04/03/2015	600	187800 - 188400 s	600	0
2	2	First stage	1	OPN4 2	04/03/2015	600	188400 - 189000 s	600	0
2	2	First stage	1	OPN4 2	04/03/2015	600	189000 - 189600 s	600	0
2	2	First stage	1	OPN4 2	04/03/2015	600	189600 - 190200 s	600	0
2	2	First stage	1	OPN4 2	04/03/2015	600	190200 - 190800 s	551.6	48.4
2	2	First stage	1	OPN4 2	04/03/2015	600	190800 - 191400 s	600	0
2	2	First stage	1	OPN4 2	04/03/2015	600	191400 - 192000 s	600	0
2	2	First stage	1	OPN4 2	04/03/2015	600	192000 - 192600 s	600	0
2	2	First stage	1	OPN4 2	04/03/2015	600	192600 - 193200 s	600	0
2	2	First stage	1	OPN4 2	04/03/2015	600	193200 - 193800 s	276.9	323.1
2	2	First stage	1	OPN4 2	04/03/2015	600	193800 - 194400 s	368.9	231.1
2	2	First stage	1	OPN4 2	04/03/2015	600	194400 - 195000 s	324.9	275.1
2	2	First stage	1	OPN4 2	04/03/2015	600	195000 - 195600 s	2.6	597.4
2	2	First stage	1	OPN4 2	04/03/2015	600	195600 - 196200 s	1.6	598.4
2	2	First stage	1	OPN4 2	04/03/2015	600	196200 - 196800 s	31	569
2	2	First stage	1	OPN4 2	04/03/2015	600	196800 - 197400 s	48.8	551.2
2	2	First stage	1	OPN4 2	04/03/2015	600	197400 - 198000 s	86	514
2	2	First stage	1	OPN4 2	04/03/2015	600	198000 - 198600 s	11.6	588.4
2	2	First stage	1	OPN4 2	04/03/2015	600	198600 - 199200 s	81.2	518.8
2	2	First stage	1	OPN4 2	04/03/2015	600	199200 - 199800 s	25.6	574.4
2	2	First stage	1	OPN4 2	04/03/2015	600	199800 - 200400 s	433.5	166.5
2	2	First stage	1	OPN4 2	04/03/2015	600	200400 - 201000 s	600	0
2	2	First stage	1	OPN4 2	04/03/2015	600	201000 - 201600 s	600	0
2	2	First stage	1	OPN4 2	04/03/2015	600	201600 - 202200 s	600	0
2	2	First stage	1	OPN4 2	04/03/2015	600	202200 - 202800 s	441.1	158.9
2	2	First stage	1	OPN4 2	04/03/2015	600	202800 - 203400 s	61.3	538.7
2	2	First stage	1	OPN4 2	04/03/2015	600	203400 - 204000 s	73.6	526.4
2	2	First stage	1	OPN4 2	04/03/2015	600	204000 - 204600 s	3.8	596.2
2	2	First stage	1	OPN4 2	04/03/2015	600	204600 - 205200 s	33.8	566.2
2	2	First stage	1	OPN4 2	04/03/2015	600	205200 - 205800 s	1.6	598.4
2	2	First stage	1	OPN4 2	04/03/2015	600	205800 - 206400 s	1.6	598.4
2	2	First stage	1	OPN4 2	04/03/2015	600	206400 - 207000 s	73.8	526.2
2	2	First stage	1	OPN4 2	04/03/2015	600	207000 - 207600 s	34.4	565.6
2	2	First stage	1	OPN4 2	04/03/2015	600	207600 - 208200 s	499.4	100.6
2	2	First stage	1	OPN4 2	04/03/2015	600	208200 - 208800 s	600	0
2	2	First stage	1	OPN4 2	04/03/2015	600	208800 - 209400 s	600	0
2	2	First stage	1	OPN4 2	04/03/2015	600	209400 - 210000 s	600	0
2	2	First stage	1	OPN4 2	04/03/2015	600	210000 - 210600 s	524.6	75.4
2	2	First stage	1	OPN4 2	04/03/2015	600	210600 - 211200 s	386.4	213.6
2	2	First stage	1	OPN4 2	04/03/2015	600	211200 - 211800 s	1	599
2	2	First stage	1	OPN4 2	04/03/2015	600	211800 - 212400 s	12	588
2	2	First stage	1	OPN4 2	04/03/2015	600	212400 - 213000 s	36.6	563.4
2	2	First stage	1	OPN4 2	04/03/2015	600	213000 - 213600 s	11.1	588.9
2	2	First stage	1	OPN4 2	04/03/2015	600	213600 - 214200 s	0	600
2	2	First stage	1	OPN4 2	04/03/2015	600	214200 - 214800 s	114	486
2	2	First stage	1	OPN4 2	04/03/2015	600	214800 - 215400 s	68.1	531.9
2	2	First stage	1	OPN4 2	04/03/2015	600	215400 - 216000 s	281	319
3	4	First stage	1	OPN4 3	04/03/2015	600	0 - 600 secs.	600	0
3	4	First stage	1	OPN4 3	04/03/2015	600	600 - 1200 secs.	600	0
3	4	First stage	1	OPN4 3	04/03/2015	600	1200 - 1800 secs.	600	0
3	4	First stage	1	OPN4 3	04/03/2015	600	1800 - 2400 secs.	600	0
3	4	First stage	1	OPN4 3	04/03/2015	600	2400 - 3000 secs.	600	0
3	4	First stage	1	OPN4 3	04/03/2015	600	3000 - 3600 secs.	600	0
3	4	First stage	1	OPN4 3	04/03/2015	600	3600 - 4200 secs.	600	0
3	4	First stage	1	OPN4 3	04/03/2015	600	4200 - 4800 secs.	600	0
3	4	First stage	1	OPN4 3	04/03/2015	600	4800 - 5400 secs.	600	0
3	4	First stage	1	OPN4 3	04/03/2015	600	5400 - 6000 secs.	600	0
3	4	First stage	1	OPN4 3	04/03/2015	600	6000 - 6600 secs.	600	0
3	4	First stage	1	OPN4 3	04/03/2015	600	6600 - 7200 secs.	600	0
3	4	First stage	1	OPN4 3	04/03/2015	600	7200 - 7800 secs.	600	0
3	4	First stage	1	OPN4 3	04/03/2015	600	7800 - 8400 secs.	600	0
3	4	First stage	1	OPN4 3	04/03/2015	600	8400 - 9000 secs.	600	0
3	4	First stage	1	OPN4 3	04/03/2015	600	9000 - 9600 secs.	543.3	56.7
3	4	First stage	1	OPN4 3	04/03/2015	600	9600 - 10200 secs	600	0
3	4	First stage	1	OPN4 3	04/03/2015	600	10200 - 10800 sec	600	0
3	4	First stage	1	OPN4 3	04/03/2015	600	10800 - 11400 sec	600	0
3	4	First stage	1	OPN4 3	04/03/2015	600	11400 - 12000 sec	600	0
3	4	First stage	1	OPN4 3	04/03/2015	600	12000 - 12600 sec	600	0
3	4	First stage	1	OPN4 3	04/03/2015	600	12600 - 13200 sec	600	0
3	4	First stage	1	OPN4 3	04/03/2015	600	13200 - 13800 sec	600	0
3	4	First stage	1	OPN4 3	04/03/2015	600	13800 - 14400 sec	600	0
3	4	First stage	1	OPN4 3	04/03/2015	600	14400 - 15000 sec	600	0
3	4	First stage	1	OPN4 3	04/03/2015	600	15000 - 15600 sec	600	0
3	4	First stage	1	OPN4 3	04/03/2015	600	15600 - 16200 sec	600	0
3	4	First stage	1	OPN4 3	04/03/2015	600	16200 - 16800 sec	600	0
3	4	First stage	1	OPN4 3	04/03/2015	600	16800 - 17400 sec	600	0
3	4	First stage	1	OPN4 3	04/03/2015	600	17400 - 18000 sec	600	0
3	4	First stage	1	OPN4 3	04/03/2015	600	18000 - 18600 sec	600	0
3	4	First stage	1	OPN4 3	04/03/2015	600	18600 - 19200 sec	600	0
3	4	First stage	1	OPN4 3	04/03/2015	600	19200 - 19800 sec	600	0
3	4	First stage	1	OPN4 3	04/03/2015	600	19800 - 20400 sec	600	0
3	4	First stage	1	OPN4 3	04/03/2015	600	20400 - 21000 sec	600	0
3	4	First stage	1	OPN4 3	04/03/2015	600	21000 - 21600 sec	600	0
3	4	First stage	1	OPN4 3	04/03/2015	600	21600 - 22200 sec	600	0
3	4	First stage	1	OPN4 3	04/03/2015	600	22200 - 22800 sec	600	0
3	4	First stage	1	OPN4 3	04/03/2015	600	22800 - 23400 sec	600	0
3	4	First stage	1	OPN4 3	04/03/2015	600	23400 - 24000 sec	600	0
3	4	First stage	1	OPN4 3	04/03/2015	600	24000 - 24600 sec	600	0
3	4	First stage	1	OPN4 3	04/03/2015	600	24600 - 25200 sec	569.9	30.1
3	4	First stage	1	OPN4 3	04/03/2015	600	25800 - 26400 sec	39.7	560.3
3	4	First stage	1	OPN4 3	04/03/2015	600	26400 - 27000 sec	63.2	536.8
3	4	First stage	1	OPN4 3	04/03/2015	600	27000 - 27600 sec	68.7	531.3
3	4	First stage	1	OPN4 3	04/03/2015	600	27600 - 28200 sec	450.2	149.8
3	4	First stage	1	OPN4 3	04/03/2015	600	28200 - 28800 sec	600	0
3	4	First stage	1	OPN4 3	04/03/2015	600	28800 - 29400 sec	600	0
3	4	First stage	1	OPN4 3	04/03/2015	600	29400 - 30000 sec	600	0
3	4	First stage	1	OPN4 3	04/03/2015	600	30000 - 30600 sec	600	0
3	4	First stage	1	OPN4 3	04/03/2015	600	30600 - 31200 sec	600	0
3	4	First stage	1	OPN4 3	04/03/2015	600	31200 - 31800 sec	600	0
3	4	First stage	1	OPN4 3	04/03/2015	600	31800 - 32400 sec	511	89
3	4	First stage	1	OPN4 3	04/03/2015	600	32400 - 33000 sec	37.7	562.3
3	4	First stage	1	OPN4 3	04/03/2015	600	33000 - 33600 sec	52.1	547.9
3	4	First stage	1	OPN4 3	04/03/2015	600	33600 - 34200 sec	75.2	524.8
3	4	First stage	1	OPN4 3	04/03/2015	600	34200 - 34800 sec	64.2	535.8
3	4	First stage	1	OPN4 3	04/03/2015	600	34800 - 35400 sec	117.9	482.1
3	4	First stage	1	OPN4 3	04/03/2015	600	35400 - 36000 sec	532.6	67.4
3	4	First stage	1	OPN4 3	04/03/2015	600	36000 - 36600 sec	76.5	523.5
3	4	First stage	1	OPN4 3	04/03/2015	600	36600 - 37200 sec	1	599
3	4	First stage	1	OPN4 3	04/03/2015	600	37200 - 37800 sec	24.3	575.7
3	4	First stage	1	OPN4 3	04/03/2015	600	37800 - 38400 sec	95	505
3	4	First stage	1	OPN4 3	04/03/2015	600	38400 - 39000 sec	600	0
3	4	First stage	1	OPN4 3	04/03/2015	600	39000 - 39600 sec	600	0
3	4	First stage	1	OPN4 3	04/03/2015	600	39600 - 40200 sec	600	0
3	4	First stage	1	OPN4 3	04/03/2015	600	40200 - 40800 sec	600	0
3	4	First stage	1	OPN4 3	04/03/2015	600	40800 - 41400 sec	600	0
3	4	First stage	1	OPN4 3	04/03/2015	600	41400 - 42000 sec	600	0
3	4	First stage	1	OPN4 3	04/03/2015	600	42000 - 42600 sec	600	0
3	4	First stage	1	OPN4 3	04/03/2015	600	42600 - 43200 sec	600	0
3	4	First stage	1	OPN4 3	04/03/2015	600	43200 - 43800 sec	600	0
3	4	First stage	1	OPN4 3	04/03/2015	600	43800 - 44400 sec	530.9	69.1
3	4	First stage	1	OPN4 3	04/03/2015	600	44400 - 45000 sec	33.3	566.7
3	4	First stage	1	OPN4 3	04/03/2015	600	45000 - 45600 sec	12.2	587.8
3	4	First stage	1	OPN4 3	04/03/2015	600	45600 - 46200 sec	81.2	518.8
3	4	First stage	1	OPN4 3	04/03/2015	600	46200 - 46800 sec	99.1	500.9
3	4	First stage	1	OPN4 3	04/03/2015	600	46800 - 47400 sec	6.2	593.8
3	4	First stage	1	OPN4 3	04/03/2015	600	47400 - 48000 sec	160	440
3	4	First stage	1	OPN4 3	04/03/2015	600	48000 - 48600 sec	21.1	578.9
3	4	First stage	1	OPN4 3	04/03/2015	600	48600 - 49200 sec	24.4	575.6
3	4	First stage	1	OPN4 3	04/03/2015	600	49200 - 49800 sec	191	409
3	4	First stage	1	OPN4 3	04/03/2015	600	49800 - 50400 sec	330.9	269.1
3	4	First stage	1	OPN4 3	04/03/2015	600	50400 - 51000 sec	33.1	566.9
3	4	First stage	1	OPN4 3	04/03/2015	600	51000 - 51600 sec	31.2	568.8
3	4	First stage	1	OPN4 3	04/03/2015	600	51600 - 52200 sec	6.2	593.8
3	4	First stage	1	OPN4 3	04/03/2015	600	52200 - 52800 sec	44.9	555.1
3	4	First stage	1	OPN4 3	04/03/2015	600	52800 - 53400 sec	0	600
3	4	First stage	1	OPN4 3	04/03/2015	600	53400 - 54000 sec	53.1	546.9
3	4	First stage	1	OPN4 3	04/03/2015	600	54000 - 54600 sec	44.6	555.4
3	4	First stage	1	OPN4 3	04/03/2015	600	54600 - 55200 sec	78.2	521.8
3	4	First stage	1	OPN4 3	04/03/2015	600	55200 - 55800 sec	200.5	399.5
3	4	First stage	1	OPN4 3	04/03/2015	600	55800 - 56400 sec	600	0
3	4	First stage	1	OPN4 3	04/03/2015	600	56400 - 57000 sec	600	0
3	4	First stage	1	OPN4 3	04/03/2015	600	57000 - 57600 sec	600	0
3	4	First stage	1	OPN4 3	04/03/2015	600	57600 - 58200 sec	218.5	381.5
3	4	First stage	1	OPN4 3	04/03/2015	600	58200 - 58800 sec	21.9	578.1
3	4	First stage	1	OPN4 3	04/03/2015	600	58800 - 59400 sec	57.3	542.7
3	4	First stage	1	OPN4 3	04/03/2015	600	59400 - 60000 sec	2.1	597.9
3	4	First stage	1	OPN4 3	04/03/2015	600	60000 - 60600 sec	15.7	584.3
3	4	First stage	1	OPN4 3	04/03/2015	600	60600 - 61200 sec	115.4	484.6
3	4	First stage	1	OPN4 3	04/03/2015	600	61200 - 61800 sec	60.8	539.2
3	4	First stage	1	OPN4 3	04/03/2015	600	61800 - 62400 sec	2.1	597.9
3	4	First stage	1	OPN4 3	04/03/2015	600	62400 - 63000 sec	3.6	596.4
3	4	First stage	1	OPN4 3	04/03/2015	600	63000 - 63600 sec	111.8	488.2
3	4	First stage	1	OPN4 3	04/03/2015	600	63600 - 64200 sec	600	0
3	4	First stage	1	OPN4 3	04/03/2015	600	64200 - 64800 sec	338.6	261.4
3	4	First stage	1	OPN4 3	04/03/2015	600	64800 - 65400 sec	18.7	581.3
3	4	First stage	1	OPN4 3	04/03/2015	600	65400 - 66000 sec	29.1	570.9
3	4	First stage	1	OPN4 3	04/03/2015	600	66000 - 66600 sec	21.5	578.5
3	4	First stage	1	OPN4 3	04/03/2015	600	66600 - 67200 sec	13	587
3	4	First stage	1	OPN4 3	04/03/2015	600	67200 - 67800 sec	56	544
3	4	First stage	1	OPN4 3	04/03/2015	600	67800 - 68400 sec	26.5	573.5
3	4	First stage	1	OPN4 3	04/03/2015	600	68400 - 69000 sec	62.4	537.6
3	4	First stage	1	OPN4 3	04/03/2015	600	69000 - 69600 sec	9.5	590.5
3	4	First stage	1	OPN4 3	04/03/2015	600	69600 - 70200 sec	42.2	557.8
3	4	First stage	1	OPN4 3	04/03/2015	600	70200 - 70800 sec	18.9	581.1
3	4	First stage	1	OPN4 3	04/03/2015	600	70800 - 71400 sec	346.6	253.4
3	4	First stage	1	OPN4 3	04/03/2015	600	71400 - 72000 sec	600	0
3	4	First stage	1	OPN4 3	04/03/2015	600	72000 - 72600 sec	600	0
3	4	First stage	1	OPN4 3	04/03/2015	600	72600 - 73200 sec	589.8	10.2
3	4	First stage	1	OPN4 3	04/03/2015	600	73200 - 73800 sec	189.5	410.5
3	4	First stage	1	OPN4 3	04/03/2015	600	73800 - 74400 sec	47.3	552.7
3	4	First stage	1	OPN4 3	04/03/2015	600	74400 - 75000 sec	0.5	599.5
3	4	First stage	1	OPN4 3	04/03/2015	600	75000 - 75600 sec	14.1	585.9
3	4	First stage	1	OPN4 3	04/03/2015	600	75600 - 76200 sec	27.6	572.4
3	4	First stage	1	OPN4 3	04/03/2015	600	76200 - 76800 sec	39.7	560.3
3	4	First stage	1	OPN4 3	04/03/2015	600	76800 - 77400 sec	23.4	576.6
3	4	First stage	1	OPN4 3	04/03/2015	600	77400 - 78000 sec	37.8	562.2
3	4	First stage	1	OPN4 3	04/03/2015	600	78000 - 78600 sec	32.4	567.6
3	4	First stage	1	OPN4 3	04/03/2015	600	78600 - 79200 sec	421.9	178.1
3	4	First stage	1	OPN4 3	04/03/2015	600	79200 - 79800 sec	600	0
3	4	First stage	1	OPN4 3	04/03/2015	600	79800 - 80400 sec	203.5	396.5
3	4	First stage	1	OPN4 3	04/03/2015	600	80400 - 81000 sec	96.1	503.9
3	4	First stage	1	OPN4 3	04/03/2015	600	81000 - 81600 sec	176.7	423.3
3	4	First stage	1	OPN4 3	04/03/2015	600	81600 - 82200 sec	76.8	523.2
3	4	First stage	1	OPN4 3	04/03/2015	600	82200 - 82800 sec	74.9	525.1
3	4	First stage	1	OPN4 3	04/03/2015	600	82800 - 83400 sec	149.1	450.9
3	4	First stage	1	OPN4 3	04/03/2015	600	83400 - 84000 sec	31.7	568.3
3	4	First stage	1	OPN4 3	04/03/2015	600	84000 - 84600 sec	325.8	274.2
3	4	First stage	1	OPN4 3	04/03/2015	600	84600 - 85200 sec	600	0
3	4	First stage	1	OPN4 3	04/03/2015	600	85200 - 85800 sec	600	0
3	4	First stage	1	OPN4 3	04/03/2015	600	85800 - 86400 sec	428.3	171.7
3	4	First stage	1	OPN4 3	04/03/2015	600	86400 - 87000 sec	155.9	444.1
3	4	First stage	1	OPN4 3	04/03/2015	600	87000 - 87600 sec	600	0
3	4	First stage	1	OPN4 3	04/03/2015	600	87600 - 88200 sec	600	0
3	4	First stage	1	OPN4 3	04/03/2015	600	88200 - 88800 sec	600	0
3	4	First stage	1	OPN4 3	04/03/2015	600	88800 - 89400 sec	600	0
3	4	First stage	1	OPN4 3	04/03/2015	600	89400 - 90000 sec	600	0
3	4	First stage	1	OPN4 3	04/03/2015	600	90000 - 90600 sec	600	0
3	4	First stage	1	OPN4 3	04/03/2015	600	90600 - 91200 sec	600	0
3	4	First stage	1	OPN4 3	04/03/2015	600	91200 - 91800 sec	600	0
3	4	First stage	1	OPN4 3	04/03/2015	600	91800 - 92400 sec	600	0
3	4	First stage	1	OPN4 3	04/03/2015	600	92400 - 93000 sec	600	0
3	4	First stage	1	OPN4 3	04/03/2015	600	93000 - 93600 sec	600	0
3	4	First stage	1	OPN4 3	04/03/2015	600	93600 - 94200 sec	600	0
3	4	First stage	1	OPN4 3	04/03/2015	600	94200 - 94800 sec	600	0
3	4	First stage	1	OPN4 3	04/03/2015	600	94800 - 95400 sec	600	0
3	4	First stage	1	OPN4 3	04/03/2015	600	95400 - 96000 sec	241.8	358.2
3	4	First stage	1	OPN4 3	04/03/2015	600	96000 - 96600 sec	127.9	472.1
3	4	First stage	1	OPN4 3	04/03/2015	600	96600 - 97200 sec	8.3	591.7
3	4	First stage	1	OPN4 3	04/03/2015	600	97200 - 97800 sec	80.8	519.2
3	4	First stage	1	OPN4 3	04/03/2015	600	97800 - 98400 sec	412.7	187.3
3	4	First stage	1	OPN4 3	04/03/2015	600	98400 - 99000 sec	600	0
3	4	First stage	1	OPN4 3	04/03/2015	600	99000 - 99600 sec	600	0
3	4	First stage	1	OPN4 3	04/03/2015	600	99600 - 100200 se	600	0
3	4	First stage	1	OPN4 3	04/03/2015	600	100200 - 100800 s	600	0
3	4	First stage	1	OPN4 3	04/03/2015	600	100800 - 101400 s	600	0
3	4	First stage	1	OPN4 3	04/03/2015	600	101400 - 102000 s	600	0
3	4	First stage	1	OPN4 3	04/03/2015	600	102000 - 102600 s	600	0
3	4	First stage	1	OPN4 3	04/03/2015	600	102600 - 103200 s	600	0
3	4	First stage	1	OPN4 3	04/03/2015	600	103200 - 103800 s	600	0
3	4	First stage	1	OPN4 3	04/03/2015	600	103800 - 104400 s	600	0
3	4	First stage	1	OPN4 3	04/03/2015	600	104400 - 105000 s	600	0
3	4	First stage	1	OPN4 3	04/03/2015	600	105000 - 105600 s	540.2	59.8
3	4	First stage	1	OPN4 3	04/03/2015	600	105600 - 106200 s	600	0
3	4	First stage	1	OPN4 3	04/03/2015	600	106200 - 106800 s	600	0
3	4	First stage	1	OPN4 3	04/03/2015	600	106800 - 107400 s	600	0
3	4	First stage	1	OPN4 3	04/03/2015	600	107400 - 108000 s	600	0
3	4	First stage	1	OPN4 3	04/03/2015	600	108000 - 108600 s	600	0
3	4	First stage	1	OPN4 3	04/03/2015	600	108600 - 109200 s	600	0
3	4	First stage	1	OPN4 3	04/03/2015	600	109200 - 109800 s	600	0
3	4	First stage	1	OPN4 3	04/03/2015	600	109800 - 110400 s	600	0
3	4	First stage	1	OPN4 3	04/03/2015	600	110400 - 111000 s	600	0
3	4	First stage	1	OPN4 3	04/03/2015	600	111000 - 111600 s	600	0
3	4	First stage	1	OPN4 3	04/03/2015	600	111600 - 112200 s	502.7	97.3
3	4	First stage	1	OPN4 3	04/03/2015	600	112200 - 112800 s	96.5	503.5
3	4	First stage	1	OPN4 3	04/03/2015	600	112800 - 113400 s	78.4	521.6
3	4	First stage	1	OPN4 3	04/03/2015	600	113400 - 114000 s	17	583
3	4	First stage	1	OPN4 3	04/03/2015	600	114000 - 114600 s	100.1	499.9
3	4	First stage	1	OPN4 3	04/03/2015	600	114600 - 115200 s	298.5	301.5
3	4	First stage	1	OPN4 3	04/03/2015	600	115200 - 115800 s	600	0
3	4	First stage	1	OPN4 3	04/03/2015	600	115800 - 116400 s	600	0
3	4	First stage	1	OPN4 3	04/03/2015	600	116400 - 117000 s	600	0
3	4	First stage	1	OPN4 3	04/03/2015	600	117000 - 117600 s	600	0
3	4	First stage	1	OPN4 3	04/03/2015	600	117600 - 118200 s	600	0
3	4	First stage	1	OPN4 3	04/03/2015	600	118200 - 118800 s	600	0
3	4	First stage	1	OPN4 3	04/03/2015	600	118800 - 119400 s	600	0
3	4	First stage	1	OPN4 3	04/03/2015	600	119400 - 120000 s	600	0
3	4	First stage	1	OPN4 3	04/03/2015	600	120000 - 120600 s	525.7	74.3
3	4	First stage	1	OPN4 3	04/03/2015	600	120600 - 121200 s	46.9	553.1
3	4	First stage	1	OPN4 3	04/03/2015	600	121200 - 121800 s	20.7	579.3
3	4	First stage	1	OPN4 3	04/03/2015	600	121800 - 122400 s	9	591
3	4	First stage	1	OPN4 3	04/03/2015	600	122400 - 123000 s	242.1	357.9
3	4	First stage	1	OPN4 3	04/03/2015	600	123000 - 123600 s	243.2	356.8
3	4	First stage	1	OPN4 3	04/03/2015	600	123600 - 124200 s	600	0
3	4	First stage	1	OPN4 3	04/03/2015	600	124200 - 124800 s	600	0
3	4	First stage	1	OPN4 3	04/03/2015	600	124800 - 125400 s	600	0
3	4	First stage	1	OPN4 3	04/03/2015	600	125400 - 126000 s	600	0
3	4	First stage	1	OPN4 3	04/03/2015	600	126000 - 126600 s	600	0
3	4	First stage	1	OPN4 3	04/03/2015	600	126600 - 127200 s	503.3	96.7
3	4	First stage	1	OPN4 3	04/03/2015	600	127200 - 127800 s	39.9	560.1
3	4	First stage	1	OPN4 3	04/03/2015	600	127800 - 128400 s	3.3	596.7
3	4	First stage	1	OPN4 3	04/03/2015	600	128400 - 129000 s	15	585
3	4	First stage	1	OPN4 3	04/03/2015	600	129000 - 129600 s	24	576
3	4	First stage	1	OPN4 3	04/03/2015	600	129600 - 130200 s	384.5	215.5
3	4	First stage	1	OPN4 3	04/03/2015	600	130200 - 130800 s	600	0
3	4	First stage	1	OPN4 3	04/03/2015	600	130800 - 131400 s	600	0
3	4	First stage	1	OPN4 3	04/03/2015	600	131400 - 132000 s	600	0
3	4	First stage	1	OPN4 3	04/03/2015	600	132000 - 132600 s	600	0
3	4	First stage	1	OPN4 3	04/03/2015	600	132600 - 133200 s	600	0
3	4	First stage	1	OPN4 3	04/03/2015	600	133200 - 133800 s	148.7	451.3
3	4	First stage	1	OPN4 3	04/03/2015	600	133800 - 134400 s	33.7	566.3
3	4	First stage	1	OPN4 3	04/03/2015	600	134400 - 135000 s	178.2	421.8
3	4	First stage	1	OPN4 3	04/03/2015	600	135000 - 135600 s	133.9	466.1
3	4	First stage	1	OPN4 3	04/03/2015	600	135600 - 136200 s	1.6	598.4
3	4	First stage	1	OPN4 3	04/03/2015	600	136200 - 136800 s	141.1	458.9
3	4	First stage	1	OPN4 3	04/03/2015	600	136800 - 137400 s	259.4	340.6
3	4	First stage	1	OPN4 3	04/03/2015	600	137400 - 138000 s	51.2	548.8
3	4	First stage	1	OPN4 3	04/03/2015	600	138000 - 138600 s	45.9	554.1
3	4	First stage	1	OPN4 3	04/03/2015	600	138600 - 139200 s	66.5	533.5
3	4	First stage	1	OPN4 3	04/03/2015	600	139200 - 139800 s	17.9	582.1
3	4	First stage	1	OPN4 3	04/03/2015	600	139800 - 140400 s	247.2	352.8
3	4	First stage	1	OPN4 3	04/03/2015	600	140400 - 141000 s	101.4	498.6
3	4	First stage	1	OPN4 3	04/03/2015	600	141000 - 141600 s	54.4	545.6
3	4	First stage	1	OPN4 3	04/03/2015	600	141600 - 142200 s	185.8	414.2
3	4	First stage	1	OPN4 3	04/03/2015	600	142200 - 142800 s	600	0
3	4	First stage	1	OPN4 3	04/03/2015	600	142800 - 143400 s	600	0
3	4	First stage	1	OPN4 3	04/03/2015	600	143400 - 144000 s	600	0
3	4	First stage	1	OPN4 3	04/03/2015	600	144000 - 144600 s	600	0
3	4	First stage	1	OPN4 3	04/03/2015	600	144600 - 145200 s	600	0
3	4	First stage	1	OPN4 3	04/03/2015	600	145200 - 145800 s	518.1	81.9
3	4	First stage	1	OPN4 3	04/03/2015	600	145800 - 146400 s	259.9	340.1
3	4	First stage	1	OPN4 3	04/03/2015	600	146400 - 147000 s	83.4	516.6
3	4	First stage	1	OPN4 3	04/03/2015	600	147000 - 147600 s	86.2	513.8
3	4	First stage	1	OPN4 3	04/03/2015	600	147600 - 148200 s	33	567
3	4	First stage	1	OPN4 3	04/03/2015	600	148200 - 148800 s	40.3	559.7
3	4	First stage	1	OPN4 3	04/03/2015	600	148800 - 149400 s	81.2	518.8
3	4	First stage	1	OPN4 3	04/03/2015	600	149400 - 150000 s	125.2	474.8
3	4	First stage	1	OPN4 3	04/03/2015	600	150000 - 150600 s	216.3	383.7
3	4	First stage	1	OPN4 3	04/03/2015	600	150600 - 151200 s	85.8	514.2
3	4	First stage	1	OPN4 3	04/03/2015	600	151200 - 151800 s	62.5	537.5
3	4	First stage	1	OPN4 3	04/03/2015	600	151800 - 152400 s	53.1	546.9
3	4	First stage	1	OPN4 3	04/03/2015	600	152400 - 153000 s	92.2	507.8
3	4	First stage	1	OPN4 3	04/03/2015	600	153000 - 153600 s	76.2	523.8
3	4	First stage	1	OPN4 3	04/03/2015	600	153600 - 154200 s	16.2	583.8
3	4	First stage	1	OPN4 3	04/03/2015	600	154200 - 154800 s	1	599
3	4	First stage	1	OPN4 3	04/03/2015	600	154800 - 155400 s	481.8	118.2
3	4	First stage	1	OPN4 3	04/03/2015	600	155400 - 156000 s	600	0
3	4	First stage	1	OPN4 3	04/03/2015	600	156000 - 156600 s	553.7	46.3
3	4	First stage	1	OPN4 3	04/03/2015	600	156600 - 157200 s	592.6	7.4
3	4	First stage	1	OPN4 3	04/03/2015	600	157200 - 157800 s	78.6	521.4
3	4	First stage	1	OPN4 3	04/03/2015	600	157800 - 158400 s	37.2	562.8
3	4	First stage	1	OPN4 3	04/03/2015	600	158400 - 159000 s	58.9	541.1
3	4	First stage	1	OPN4 3	04/03/2015	600	159000 - 159600 s	1	599
3	4	First stage	1	OPN4 3	04/03/2015	600	159600 - 160200 s	140.6	459.4
3	4	First stage	1	OPN4 3	04/03/2015	600	160200 - 160800 s	20.1	579.9
3	4	First stage	1	OPN4 3	04/03/2015	600	160800 - 161400 s	51.8	548.2
3	4	First stage	1	OPN4 3	04/03/2015	600	161400 - 162000 s	0.6	599.4
3	4	First stage	1	OPN4 3	04/03/2015	600	162000 - 162600 s	24.6	575.4
3	4	First stage	1	OPN4 3	04/03/2015	600	162600 - 163200 s	231.8	368.2
3	4	First stage	1	OPN4 3	04/03/2015	600	163200 - 163800 s	600	0
3	4	First stage	1	OPN4 3	04/03/2015	600	163800 - 164400 s	600	0
3	4	First stage	1	OPN4 3	04/03/2015	600	164400 - 165000 s	400.3	199.7
3	4	First stage	1	OPN4 3	04/03/2015	600	165000 - 165600 s	134	466
3	4	First stage	1	OPN4 3	04/03/2015	600	165600 - 166200 s	51.7	548.3
3	4	First stage	1	OPN4 3	04/03/2015	600	166200 - 166800 s	97.2	502.8
3	4	First stage	1	OPN4 3	04/03/2015	600	166800 - 167400 s	42.8	557.2
3	4	First stage	1	OPN4 3	04/03/2015	600	167400 - 168000 s	203.8	396.2
3	4	First stage	1	OPN4 3	04/03/2015	600	168000 - 168600 s	63.4	536.6
3	4	First stage	1	OPN4 3	04/03/2015	600	168600 - 169200 s	107.4	492.6
3	4	First stage	1	OPN4 3	04/03/2015	600	169200 - 169800 s	114.8	485.2
3	4	First stage	1	OPN4 3	04/03/2015	600	169800 - 170400 s	600	0
3	4	First stage	1	OPN4 3	04/03/2015	600	170400 - 171000 s	600	0
3	4	First stage	1	OPN4 3	04/03/2015	600	171000 - 171600 s	485.2	114.8
3	4	First stage	1	OPN4 3	04/03/2015	600	171600 - 172200 s	162.2	437.8
3	4	First stage	1	OPN4 3	04/03/2015	600	172200 - 172800 s	102.1	497.9
3	4	First stage	1	OPN4 3	04/03/2015	600	172800 - 173400 s	95.3	504.7
3	4	First stage	1	OPN4 3	04/03/2015	600	173400 - 174000 s	11.7	588.3
3	4	First stage	1	OPN4 3	04/03/2015	600	174000 - 174600 s	52.2	547.8
3	4	First stage	1	OPN4 3	04/03/2015	600	174600 - 175200 s	594.3	5.7
3	4	First stage	1	OPN4 3	04/03/2015	600	175200 - 175800 s	474.9	125.1
3	4	First stage	1	OPN4 3	04/03/2015	600	175800 - 176400 s	600	0
3	4	First stage	1	OPN4 3	04/03/2015	600	176400 - 177000 s	272.3	327.7
3	4	First stage	1	OPN4 3	04/03/2015	600	177000 - 177600 s	295.8	304.2
3	4	First stage	1	OPN4 3	04/03/2015	600	177600 - 178200 s	443.5	156.5
3	4	First stage	1	OPN4 3	04/03/2015	600	178200 - 178800 s	600	0
3	4	First stage	1	OPN4 3	04/03/2015	600	178800 - 179400 s	600	0
3	4	First stage	1	OPN4 3	04/03/2015	600	179400 - 180000 s	600	0
3	4	First stage	1	OPN4 3	04/03/2015	600	180000 - 180600 s	600	0
3	4	First stage	1	OPN4 3	04/03/2015	600	180600 - 181200 s	600	0
3	4	First stage	1	OPN4 3	04/03/2015	600	181200 - 181800 s	600	0
3	4	First stage	1	OPN4 3	04/03/2015	600	181800 - 182400 s	541.2	58.8
3	4	First stage	1	OPN4 3	04/03/2015	600	182400 - 183000 s	600	0
3	4	First stage	1	OPN4 3	04/03/2015	600	183000 - 183600 s	600	0
3	4	First stage	1	OPN4 3	04/03/2015	600	183600 - 184200 s	600	0
3	4	First stage	1	OPN4 3	04/03/2015	600	184200 - 184800 s	600	0
3	4	First stage	1	OPN4 3	04/03/2015	600	184800 - 185400 s	457.7	142.3
3	4	First stage	1	OPN4 3	04/03/2015	600	185400 - 186000 s	512.4	87.6
3	4	First stage	1	OPN4 3	04/03/2015	600	186000 - 186600 s	600	0
3	4	First stage	1	OPN4 3	04/03/2015	600	186600 - 187200 s	600	0
3	4	First stage	1	OPN4 3	04/03/2015	600	187200 - 187800 s	541.4	58.6
3	4	First stage	1	OPN4 3	04/03/2015	600	187800 - 188400 s	79.2	520.8
3	4	First stage	1	OPN4 3	04/03/2015	600	188400 - 189000 s	206.5	393.5
3	4	First stage	1	OPN4 3	04/03/2015	600	189000 - 189600 s	600	0
3	4	First stage	1	OPN4 3	04/03/2015	600	189600 - 190200 s	600	0
3	4	First stage	1	OPN4 3	04/03/2015	600	190200 - 190800 s	600	0
3	4	First stage	1	OPN4 3	04/03/2015	600	190800 - 191400 s	600	0
3	4	First stage	1	OPN4 3	04/03/2015	600	191400 - 192000 s	600	0
3	4	First stage	1	OPN4 3	04/03/2015	600	192000 - 192600 s	600	0
3	4	First stage	1	OPN4 3	04/03/2015	600	192600 - 193200 s	600	0
3	4	First stage	1	OPN4 3	04/03/2015	600	193200 - 193800 s	600	0
3	4	First stage	1	OPN4 3	04/03/2015	600	193800 - 194400 s	600	0
3	4	First stage	1	OPN4 3	04/03/2015	600	194400 - 195000 s	600	0
3	4	First stage	1	OPN4 3	04/03/2015	600	195000 - 195600 s	544.4	55.6
3	4	First stage	1	OPN4 3	04/03/2015	600	195600 - 196200 s	600	0
3	4	First stage	1	OPN4 3	04/03/2015	600	196200 - 196800 s	149.1	450.9
3	4	First stage	1	OPN4 3	04/03/2015	600	196800 - 197400 s	26.5	573.5
3	4	First stage	1	OPN4 3	04/03/2015	600	197400 - 198000 s	15.6	584.4
3	4	First stage	1	OPN4 3	04/03/2015	600	198000 - 198600 s	2.6	597.4
3	4	First stage	1	OPN4 3	04/03/2015	600	198600 - 199200 s	129.5	470.5
3	4	First stage	1	OPN4 3	04/03/2015	600	199200 - 199800 s	2.1	597.9
3	4	First stage	1	OPN4 3	04/03/2015	600	199800 - 200400 s	96.7	503.3
3	4	First stage	1	OPN4 3	04/03/2015	600	200400 - 201000 s	121.2	478.8
3	4	First stage	1	OPN4 3	04/03/2015	600	201000 - 201600 s	15.1	584.9
3	4	First stage	1	OPN4 3	04/03/2015	600	201600 - 202200 s	595.2	4.8
3	4	First stage	1	OPN4 3	04/03/2015	600	202200 - 202800 s	600	0
3	4	First stage	1	OPN4 3	04/03/2015	600	202800 - 203400 s	600	0
3	4	First stage	1	OPN4 3	04/03/2015	600	203400 - 204000 s	600	0
3	4	First stage	1	OPN4 3	04/03/2015	600	204000 - 204600 s	600	0
3	4	First stage	1	OPN4 3	04/03/2015	600	204600 - 205200 s	600	0
3	4	First stage	1	OPN4 3	04/03/2015	600	205200 - 205800 s	600	0
3	4	First stage	1	OPN4 3	04/03/2015	600	205800 - 206400 s	457.2	142.8
3	4	First stage	1	OPN4 3	04/03/2015	600	206400 - 207000 s	8.9	591.1
3	4	First stage	1	OPN4 3	04/03/2015	600	207000 - 207600 s	40.6	559.4
3	4	First stage	1	OPN4 3	04/03/2015	600	207600 - 208200 s	1	599
3	4	First stage	1	OPN4 3	04/03/2015	600	208200 - 208800 s	69	531
3	4	First stage	1	OPN4 3	04/03/2015	600	208800 - 209400 s	213.6	386.4
3	4	First stage	1	OPN4 3	04/03/2015	600	209400 - 210000 s	40.4	559.6
3	4	First stage	1	OPN4 3	04/03/2015	600	210000 - 210600 s	292.6	307.4
3	4	First stage	1	OPN4 3	04/03/2015	600	210600 - 211200 s	600	0
3	4	First stage	1	OPN4 3	04/03/2015	600	211200 - 211800 s	600	0
3	4	First stage	1	OPN4 3	04/03/2015	600	211800 - 212400 s	600	0
3	4	First stage	1	OPN4 3	04/03/2015	600	212400 - 213000 s	600	0
3	4	First stage	1	OPN4 3	04/03/2015	600	213000 - 213600 s	600	0
3	4	First stage	1	OPN4 3	04/03/2015	600	213600 - 214200 s	600	0
3	4	First stage	1	OPN4 3	04/03/2015	600	214200 - 214800 s	600	0
3	4	First stage	1	OPN4 3	04/03/2015	600	214800 - 215400 s	600	0
3	4	First stage	1	OPN4 3	04/03/2015	600	215400 - 216000 s	600	0
4	3	First stage	1	OPN4 4	04/03/2015	600	0 - 600 secs.	544.7	55.3
4	3	First stage	1	OPN4 4	04/03/2015	600	600 - 1200 secs.	600	0
4	3	First stage	1	OPN4 4	04/03/2015	600	1200 - 1800 secs.	600	0
4	3	First stage	1	OPN4 4	04/03/2015	600	1800 - 2400 secs.	600	0
4	3	First stage	1	OPN4 4	04/03/2015	600	2400 - 3000 secs.	600	0
4	3	First stage	1	OPN4 4	04/03/2015	600	3000 - 3600 secs.	600	0
4	3	First stage	1	OPN4 4	04/03/2015	600	3600 - 4200 secs.	600	0
4	3	First stage	1	OPN4 4	04/03/2015	600	4200 - 4800 secs.	553.6	46.4
4	3	First stage	1	OPN4 4	04/03/2015	600	4800 - 5400 secs.	600	0
4	3	First stage	1	OPN4 4	04/03/2015	600	5400 - 6000 secs.	600	0
4	3	First stage	1	OPN4 4	04/03/2015	600	6000 - 6600 secs.	600	0
4	3	First stage	1	OPN4 4	04/03/2015	600	6600 - 7200 secs.	600	0
4	3	First stage	1	OPN4 4	04/03/2015	600	7200 - 7800 secs.	600	0
4	3	First stage	1	OPN4 4	04/03/2015	600	7800 - 8400 secs.	600	0
4	3	First stage	1	OPN4 4	04/03/2015	600	8400 - 9000 secs.	600	0
4	3	First stage	1	OPN4 4	04/03/2015	600	9000 - 9600 secs.	600	0
4	3	First stage	1	OPN4 4	04/03/2015	600	9600 - 10200 secs	545.9	54.1
4	3	First stage	1	OPN4 4	04/03/2015	600	10200 - 10800 sec	600	0
4	3	First stage	1	OPN4 4	04/03/2015	600	10800 - 11400 sec	600	0
4	3	First stage	1	OPN4 4	04/03/2015	600	11400 - 12000 sec	600	0
4	3	First stage	1	OPN4 4	04/03/2015	600	12000 - 12600 sec	600	0
4	3	First stage	1	OPN4 4	04/03/2015	600	12600 - 13200 sec	600	0
4	3	First stage	1	OPN4 4	04/03/2015	600	13200 - 13800 sec	537	63
4	3	First stage	1	OPN4 4	04/03/2015	600	13800 - 14400 sec	556	44
4	3	First stage	1	OPN4 4	04/03/2015	600	14400 - 15000 sec	600	0
4	3	First stage	1	OPN4 4	04/03/2015	600	15000 - 15600 sec	321.9	278.1
4	3	First stage	1	OPN4 4	04/03/2015	600	15600 - 16200 sec	252.8	347.2
4	3	First stage	1	OPN4 4	04/03/2015	600	16200 - 16800 sec	600	0
4	3	First stage	1	OPN4 4	04/03/2015	600	16800 - 17400 sec	600	0
4	3	First stage	1	OPN4 4	04/03/2015	600	17400 - 18000 sec	181.8	418.2
4	3	First stage	1	OPN4 4	04/03/2015	600	18000 - 18600 sec	127.8	472.2
4	3	First stage	1	OPN4 4	04/03/2015	600	18600 - 19200 sec	54.9	545.1
4	3	First stage	1	OPN4 4	04/03/2015	600	19200 - 19800 sec	102.3	497.7
4	3	First stage	1	OPN4 4	04/03/2015	600	19800 - 20400 sec	208.3	391.7
4	3	First stage	1	OPN4 4	04/03/2015	600	20400 - 21000 sec	237.4	362.6
4	3	First stage	1	OPN4 4	04/03/2015	600	21000 - 21600 sec	42.9	557.1
4	3	First stage	1	OPN4 4	04/03/2015	600	21600 - 22200 sec	3.7	596.3
4	3	First stage	1	OPN4 4	04/03/2015	600	22200 - 22800 sec	156.3	443.7
4	3	First stage	1	OPN4 4	04/03/2015	600	22800 - 23400 sec	600	0
4	3	First stage	1	OPN4 4	04/03/2015	600	23400 - 24000 sec	600	0
4	3	First stage	1	OPN4 4	04/03/2015	600	24000 - 24600 sec	600	0
4	3	First stage	1	OPN4 4	04/03/2015	600	24600 - 25200 sec	600	0
4	3	First stage	1	OPN4 4	04/03/2015	600	25800 - 26400 sec	542.3	57.7
4	3	First stage	1	OPN4 4	04/03/2015	600	26400 - 27000 sec	600	0
4	3	First stage	1	OPN4 4	04/03/2015	600	27000 - 27600 sec	600	0
4	3	First stage	1	OPN4 4	04/03/2015	600	27600 - 28200 sec	363.4	236.6
4	3	First stage	1	OPN4 4	04/03/2015	600	28200 - 28800 sec	57.8	542.2
4	3	First stage	1	OPN4 4	04/03/2015	600	28800 - 29400 sec	24.7	575.3
4	3	First stage	1	OPN4 4	04/03/2015	600	29400 - 30000 sec	536	64
4	3	First stage	1	OPN4 4	04/03/2015	600	30000 - 30600 sec	600	0
4	3	First stage	1	OPN4 4	04/03/2015	600	30600 - 31200 sec	114.6	485.4
4	3	First stage	1	OPN4 4	04/03/2015	600	31200 - 31800 sec	44	556
4	3	First stage	1	OPN4 4	04/03/2015	600	31800 - 32400 sec	74.9	525.1
4	3	First stage	1	OPN4 4	04/03/2015	600	32400 - 33000 sec	95.5	504.5
4	3	First stage	1	OPN4 4	04/03/2015	600	33000 - 33600 sec	526	74
4	3	First stage	1	OPN4 4	04/03/2015	600	33600 - 34200 sec	31.6	568.4
4	3	First stage	1	OPN4 4	04/03/2015	600	34200 - 34800 sec	125.3	474.7
4	3	First stage	1	OPN4 4	04/03/2015	600	34800 - 35400 sec	98	502
4	3	First stage	1	OPN4 4	04/03/2015	600	35400 - 36000 sec	201.9	398.1
4	3	First stage	1	OPN4 4	04/03/2015	600	36000 - 36600 sec	600	0
4	3	First stage	1	OPN4 4	04/03/2015	600	36600 - 37200 sec	600	0
4	3	First stage	1	OPN4 4	04/03/2015	600	37200 - 37800 sec	600	0
4	3	First stage	1	OPN4 4	04/03/2015	600	37800 - 38400 sec	600	0
4	3	First stage	1	OPN4 4	04/03/2015	600	38400 - 39000 sec	470.8	129.2
4	3	First stage	1	OPN4 4	04/03/2015	600	39000 - 39600 sec	417	183
4	3	First stage	1	OPN4 4	04/03/2015	600	39600 - 40200 sec	14.6	585.4
4	3	First stage	1	OPN4 4	04/03/2015	600	40200 - 40800 sec	17.2	582.8
4	3	First stage	1	OPN4 4	04/03/2015	600	40800 - 41400 sec	34.4	565.6
4	3	First stage	1	OPN4 4	04/03/2015	600	41400 - 42000 sec	50.9	549.1
4	3	First stage	1	OPN4 4	04/03/2015	600	42000 - 42600 sec	5.2	594.8
4	3	First stage	1	OPN4 4	04/03/2015	600	42600 - 43200 sec	0	600
4	3	First stage	1	OPN4 4	04/03/2015	600	43200 - 43800 sec	211.1	388.9
4	3	First stage	1	OPN4 4	04/03/2015	600	43800 - 44400 sec	600	0
4	3	First stage	1	OPN4 4	04/03/2015	600	44400 - 45000 sec	318.6	281.4
4	3	First stage	1	OPN4 4	04/03/2015	600	45000 - 45600 sec	20.8	579.2
4	3	First stage	1	OPN4 4	04/03/2015	600	45600 - 46200 sec	39	561
4	3	First stage	1	OPN4 4	04/03/2015	600	46200 - 46800 sec	64.3	535.7
4	3	First stage	1	OPN4 4	04/03/2015	600	46800 - 47400 sec	0	600
4	3	First stage	1	OPN4 4	04/03/2015	600	47400 - 48000 sec	29.3	570.7
4	3	First stage	1	OPN4 4	04/03/2015	600	48000 - 48600 sec	30.9	569.1
4	3	First stage	1	OPN4 4	04/03/2015	600	48600 - 49200 sec	36.7	563.3
4	3	First stage	1	OPN4 4	04/03/2015	600	49200 - 49800 sec	33.8	566.2
4	3	First stage	1	OPN4 4	04/03/2015	600	49800 - 50400 sec	11.5	588.5
4	3	First stage	1	OPN4 4	04/03/2015	600	50400 - 51000 sec	2.6	597.4
4	3	First stage	1	OPN4 4	04/03/2015	600	51000 - 51600 sec	10.1	589.9
4	3	First stage	1	OPN4 4	04/03/2015	600	51600 - 52200 sec	368.7	231.3
4	3	First stage	1	OPN4 4	04/03/2015	600	52200 - 52800 sec	161.8	438.2
4	3	First stage	1	OPN4 4	04/03/2015	600	52800 - 53400 sec	78.5	521.5
4	3	First stage	1	OPN4 4	04/03/2015	600	53400 - 54000 sec	2.6	597.4
4	3	First stage	1	OPN4 4	04/03/2015	600	54000 - 54600 sec	87.5	512.5
4	3	First stage	1	OPN4 4	04/03/2015	600	54600 - 55200 sec	0	600
4	3	First stage	1	OPN4 4	04/03/2015	600	55200 - 55800 sec	130	470
4	3	First stage	1	OPN4 4	04/03/2015	600	55800 - 56400 sec	4.4	595.6
4	3	First stage	1	OPN4 4	04/03/2015	600	56400 - 57000 sec	68.8	531.2
4	3	First stage	1	OPN4 4	04/03/2015	600	57000 - 57600 sec	4.2	595.8
4	3	First stage	1	OPN4 4	04/03/2015	600	57600 - 58200 sec	0	600
4	3	First stage	1	OPN4 4	04/03/2015	600	58200 - 58800 sec	0.5	599.5
4	3	First stage	1	OPN4 4	04/03/2015	600	58800 - 59400 sec	14.6	585.4
4	3	First stage	1	OPN4 4	04/03/2015	600	59400 - 60000 sec	3.1	596.9
4	3	First stage	1	OPN4 4	04/03/2015	600	60000 - 60600 sec	368.7	231.3
4	3	First stage	1	OPN4 4	04/03/2015	600	60600 - 61200 sec	600	0
4	3	First stage	1	OPN4 4	04/03/2015	600	61200 - 61800 sec	597.4	2.6
4	3	First stage	1	OPN4 4	04/03/2015	600	61800 - 62400 sec	561.2	38.8
4	3	First stage	1	OPN4 4	04/03/2015	600	62400 - 63000 sec	263.7	336.3
4	3	First stage	1	OPN4 4	04/03/2015	600	63000 - 63600 sec	2.2	597.8
4	3	First stage	1	OPN4 4	04/03/2015	600	63600 - 64200 sec	0	600
4	3	First stage	1	OPN4 4	04/03/2015	600	64200 - 64800 sec	50.9	549.1
4	3	First stage	1	OPN4 4	04/03/2015	600	64800 - 65400 sec	18.9	581.1
4	3	First stage	1	OPN4 4	04/03/2015	600	65400 - 66000 sec	34.2	565.8
4	3	First stage	1	OPN4 4	04/03/2015	600	66000 - 66600 sec	135.7	464.3
4	3	First stage	1	OPN4 4	04/03/2015	600	66600 - 67200 sec	547.2	52.8
4	3	First stage	1	OPN4 4	04/03/2015	600	67200 - 67800 sec	468.9	131.1
4	3	First stage	1	OPN4 4	04/03/2015	600	67800 - 68400 sec	43.7	556.3
4	3	First stage	1	OPN4 4	04/03/2015	600	68400 - 69000 sec	0.5	599.5
4	3	First stage	1	OPN4 4	04/03/2015	600	69000 - 69600 sec	37	563
4	3	First stage	1	OPN4 4	04/03/2015	600	69600 - 70200 sec	52.1	547.9
4	3	First stage	1	OPN4 4	04/03/2015	600	70200 - 70800 sec	40.9	559.1
4	3	First stage	1	OPN4 4	04/03/2015	600	70800 - 71400 sec	81.6	518.4
4	3	First stage	1	OPN4 4	04/03/2015	600	71400 - 72000 sec	488	112
4	3	First stage	1	OPN4 4	04/03/2015	600	72000 - 72600 sec	548.9	51.1
4	3	First stage	1	OPN4 4	04/03/2015	600	72600 - 73200 sec	323.3	276.7
4	3	First stage	1	OPN4 4	04/03/2015	600	73200 - 73800 sec	124.4	475.6
4	3	First stage	1	OPN4 4	04/03/2015	600	73800 - 74400 sec	38.6	561.4
4	3	First stage	1	OPN4 4	04/03/2015	600	74400 - 75000 sec	10.6	589.4
4	3	First stage	1	OPN4 4	04/03/2015	600	75000 - 75600 sec	43.9	556.1
4	3	First stage	1	OPN4 4	04/03/2015	600	75600 - 76200 sec	11.5	588.5
4	3	First stage	1	OPN4 4	04/03/2015	600	76200 - 76800 sec	42.7	557.3
4	3	First stage	1	OPN4 4	04/03/2015	600	76800 - 77400 sec	96.9	503.1
4	3	First stage	1	OPN4 4	04/03/2015	600	77400 - 78000 sec	45.8	554.2
4	3	First stage	1	OPN4 4	04/03/2015	600	78000 - 78600 sec	7.8	592.2
4	3	First stage	1	OPN4 4	04/03/2015	600	78600 - 79200 sec	55.9	544.1
4	3	First stage	1	OPN4 4	04/03/2015	600	79200 - 79800 sec	9	591
4	3	First stage	1	OPN4 4	04/03/2015	600	79800 - 80400 sec	120.2	479.8
4	3	First stage	1	OPN4 4	04/03/2015	600	80400 - 81000 sec	263.6	336.4
4	3	First stage	1	OPN4 4	04/03/2015	600	81000 - 81600 sec	600	0
4	3	First stage	1	OPN4 4	04/03/2015	600	81600 - 82200 sec	600	0
4	3	First stage	1	OPN4 4	04/03/2015	600	82200 - 82800 sec	375.7	224.3
4	3	First stage	1	OPN4 4	04/03/2015	600	82800 - 83400 sec	52	548
4	3	First stage	1	OPN4 4	04/03/2015	600	83400 - 84000 sec	202.2	397.8
4	3	First stage	1	OPN4 4	04/03/2015	600	84000 - 84600 sec	0	600
4	3	First stage	1	OPN4 4	04/03/2015	600	84600 - 85200 sec	495.6	104.4
4	3	First stage	1	OPN4 4	04/03/2015	600	85200 - 85800 sec	588.6	11.4
4	3	First stage	1	OPN4 4	04/03/2015	600	85800 - 86400 sec	149.2	450.8
4	3	First stage	1	OPN4 4	04/03/2015	600	86400 - 87000 sec	600	0
4	3	First stage	1	OPN4 4	04/03/2015	600	87000 - 87600 sec	600	0
4	3	First stage	1	OPN4 4	04/03/2015	600	87600 - 88200 sec	600	0
4	3	First stage	1	OPN4 4	04/03/2015	600	88200 - 88800 sec	600	0
4	3	First stage	1	OPN4 4	04/03/2015	600	88800 - 89400 sec	600	0
4	3	First stage	1	OPN4 4	04/03/2015	600	89400 - 90000 sec	600	0
4	3	First stage	1	OPN4 4	04/03/2015	600	90000 - 90600 sec	600	0
4	3	First stage	1	OPN4 4	04/03/2015	600	90600 - 91200 sec	600	0
4	3	First stage	1	OPN4 4	04/03/2015	600	91200 - 91800 sec		0
4	3	First stage	1	OPN4 4	04/03/2015	600	91800 - 92400 sec	600	0
4	3	First stage	1	OPN4 4	04/03/2015	600	92400 - 93000 sec	600	0
4	3	First stage	1	OPN4 4	04/03/2015	600	93000 - 93600 sec	520	0
4	3	First stage	1	OPN4 4	04/03/2015	600	93600 - 94200 sec	600	0
4	3	First stage	1	OPN4 4	04/03/2015	600	94200 - 94800 sec	263.7	80
4	3	First stage	1	OPN4 4	04/03/2015	600	94800 - 95400 sec	25.1	0
4	3	First stage	1	OPN4 4	04/03/2015	600	95400 - 96000 sec	0.5	336.3
4	3	First stage	1	OPN4 4	04/03/2015	600	96000 - 96600 sec	193.8	574.9
4	3	First stage	1	OPN4 4	04/03/2015	600	96600 - 97200 sec	228.4	599.5
4	3	First stage	1	OPN4 4	04/03/2015	600	97200 - 97800 sec	39.5	406.2
4	3	First stage	1	OPN4 4	04/03/2015	600	97800 - 98400 sec	397.6	371.6
4	3	First stage	1	OPN4 4	04/03/2015	600	98400 - 99000 sec	600	0
4	3	First stage	1	OPN4 4	04/03/2015	600	99000 - 99600 sec	600	0
4	3	First stage	1	OPN4 4	04/03/2015	600	99600 - 100200 se	600	0
4	3	First stage	1	OPN4 4	04/03/2015	600	100200 - 100800 s	600	0
4	3	First stage	1	OPN4 4	04/03/2015	600	100800 - 101400 s	600	0
4	3	First stage	1	OPN4 4	04/03/2015	600	101400 - 102000 s	600	0
4	3	First stage	1	OPN4 4	04/03/2015	600	102000 - 102600 s	600	0
4	3	First stage	1	OPN4 4	04/03/2015	600	102600 - 103200 s	600	0
4	3	First stage	1	OPN4 4	04/03/2015	600	103200 - 103800 s	600	0
4	3	First stage	1	OPN4 4	04/03/2015	600	103800 - 104400 s	600	0
4	3	First stage	1	OPN4 4	04/03/2015	600	104400 - 105000 s	600	0
4	3	First stage	1	OPN4 4	04/03/2015	600	105000 - 105600 s	600	0
4	3	First stage	1	OPN4 4	04/03/2015	600	105600 - 106200 s	600	0
4	3	First stage	1	OPN4 4	04/03/2015	600	106200 - 106800 s	265.9	334.2
4	3	First stage	1	OPN4 4	04/03/2015	600	106800 - 107400 s	69.2	530.8
4	3	First stage	1	OPN4 4	04/03/2015	600	107400 - 108000 s	104.2	495.8
4	3	First stage	1	OPN4 4	04/03/2015	600	108000 - 108600 s	45.7	554.3
4	3	First stage	1	OPN4 4	04/03/2015	600	108600 - 109200 s	50.4	549.6
4	3	First stage	1	OPN4 4	04/03/2015	600	109200 - 109800 s	389.3	210.7
4	3	First stage	1	OPN4 4	04/03/2015	600	109800 - 110400 s	600	0
4	3	First stage	1	OPN4 4	04/03/2015	600	110400 - 111000 s	600	0
4	3	First stage	1	OPN4 4	04/03/2015	600	111000 - 111600 s	600	0
4	3	First stage	1	OPN4 4	04/03/2015	600	111600 - 112200 s	600	0
4	3	First stage	1	OPN4 4	04/03/2015	600	112200 - 112800 s	600	0
4	3	First stage	1	OPN4 4	04/03/2015	600	112800 - 113400 s	600	0
4	3	First stage	1	OPN4 4	04/03/2015	600	113400 - 114000 s	600	0
4	3	First stage	1	OPN4 4	04/03/2015	600	114000 - 114600 s	600	0
4	3	First stage	1	OPN4 4	04/03/2015	600	114600 - 115200 s	600	0
4	3	First stage	1	OPN4 4	04/03/2015	600	115200 - 115800 s	600	0
4	3	First stage	1	OPN4 4	04/03/2015	600	115800 - 116400 s	136.1	463.9
4	3	First stage	1	OPN4 4	04/03/2015	600	116400 - 117000 s	9.2	590.9
4	3	First stage	1	OPN4 4	04/03/2015	600	117000 - 117600 s	29.2	570.8
4	3	First stage	1	OPN4 4	04/03/2015	600	117600 - 118200 s	15.3	584.7
4	3	First stage	1	OPN4 4	04/03/2015	600	118200 - 118800 s	44.7	555.3
4	3	First stage	1	OPN4 4	04/03/2015	600	118800 - 119400 s	0	600
4	3	First stage	1	OPN4 4	04/03/2015	600	119400 - 120000 s	304.7	295.3
4	3	First stage	1	OPN4 4	04/03/2015	600	120000 - 120600 s	600	0
4	3	First stage	1	OPN4 4	04/03/2015	600	120600 - 121200 s	600	0
4	3	First stage	1	OPN4 4	04/03/2015	600	121200 - 121800 s	539.3	60.7
4	3	First stage	1	OPN4 4	04/03/2015	600	121800 - 122400 s	600	0
4	3	First stage	1	OPN4 4	04/03/2015	600	122400 - 123000 s	600	0
4	3	First stage	1	OPN4 4	04/03/2015	600	123000 - 123600 s	600	0
4	3	First stage	1	OPN4 4	04/03/2015	600	123600 - 124200 s	466.8	133.2
4	3	First stage	1	OPN4 4	04/03/2015	600	124200 - 124800 s	103.8	496.2
4	3	First stage	1	OPN4 4	04/03/2015	600	124800 - 125400 s	67.3	532.7
4	3	First stage	1	OPN4 4	04/03/2015	600	125400 - 126000 s	31.9	568.1
4	3	First stage	1	OPN4 4	04/03/2015	600	126000 - 126600 s	316.8	283.3
4	3	First stage	1	OPN4 4	04/03/2015	600	126600 - 127200 s	600	0
4	3	First stage	1	OPN4 4	04/03/2015	600	127200 - 127800 s	600	0
4	3	First stage	1	OPN4 4	04/03/2015	600	127800 - 128400 s	600	0
4	3	First stage	1	OPN4 4	04/03/2015	600	128400 - 129000 s	600	0
4	3	First stage	1	OPN4 4	04/03/2015	600	129000 - 129600 s	600	0
4	3	First stage	1	OPN4 4	04/03/2015	600	129600 - 130200 s	600	0
4	3	First stage	1	OPN4 4	04/03/2015	600	130200 - 130800 s	397.3	202.7
4	3	First stage	1	OPN4 4	04/03/2015	600	130800 - 131400 s	29	571
4	3	First stage	1	OPN4 4	04/03/2015	600	131400 - 132000 s	2.6	597.4
4	3	First stage	1	OPN4 4	04/03/2015	600	132000 - 132600 s	35.3	564.7
4	3	First stage	1	OPN4 4	04/03/2015	600	132600 - 133200 s	40.5	559.5
4	3	First stage	1	OPN4 4	04/03/2015	600	133200 - 133800 s	26.5	573.5
4	3	First stage	1	OPN4 4	04/03/2015	600	133800 - 134400 s	72.7	527.3
4	3	First stage	1	OPN4 4	04/03/2015	600	134400 - 135000 s	219.9	380.1
4	3	First stage	1	OPN4 4	04/03/2015	600	135000 - 135600 s	600	0
4	3	First stage	1	OPN4 4	04/03/2015	600	135600 - 136200 s	318.5	281.5
4	3	First stage	1	OPN4 4	04/03/2015	600	136200 - 136800 s	2.1	597.9
4	3	First stage	1	OPN4 4	04/03/2015	600	136800 - 137400 s	0.5	599.5
4	3	First stage	1	OPN4 4	04/03/2015	600	137400 - 138000 s	66.6	533.4
4	3	First stage	1	OPN4 4	04/03/2015	600	138000 - 138600 s	0.5	599.5
4	3	First stage	1	OPN4 4	04/03/2015	600	138600 - 139200 s	5.8	594.2
4	3	First stage	1	OPN4 4	04/03/2015	600	139200 - 139800 s	401.8	198.2
4	3	First stage	1	OPN4 4	04/03/2015	600	139800 - 140400 s	600	0
4	3	First stage	1	OPN4 4	04/03/2015	600	140400 - 141000 s	600	0
4	3	First stage	1	OPN4 4	04/03/2015	600	141000 - 141600 s	600	0
4	3	First stage	1	OPN4 4	04/03/2015	600	141600 - 142200 s	600	0
4	3	First stage	1	OPN4 4	04/03/2015	600	142200 - 142800 s	600	0
4	3	First stage	1	OPN4 4	04/03/2015	600	142800 - 143400 s	600	0
4	3	First stage	1	OPN4 4	04/03/2015	600	143400 - 144000 s	558.3	41.7
4	3	First stage	1	OPN4 4	04/03/2015	600	144000 - 144600 s	524.5	75.5
4	3	First stage	1	OPN4 4	04/03/2015	600	144600 - 145200 s	336.4	263.6
4	3	First stage	1	OPN4 4	04/03/2015	600	145200 - 145800 s	21.9	578.1
4	3	First stage	1	OPN4 4	04/03/2015	600	145800 - 146400 s	5.8	594.2
4	3	First stage	1	OPN4 4	04/03/2015	600	146400 - 147000 s	39.9	560.1
4	3	First stage	1	OPN4 4	04/03/2015	600	147000 - 147600 s	22	578
4	3	First stage	1	OPN4 4	04/03/2015	600	147600 - 148200 s	26	574
4	3	First stage	1	OPN4 4	04/03/2015	600	148200 - 148800 s	42.3	557.7
4	3	First stage	1	OPN4 4	04/03/2015	600	148800 - 149400 s	89.6	510.4
4	3	First stage	1	OPN4 4	04/03/2015	600	149400 - 150000 s	10.6	589.4
4	3	First stage	1	OPN4 4	04/03/2015	600	150000 - 150600 s	54.5	545.5
4	3	First stage	1	OPN4 4	04/03/2015	600	150600 - 151200 s	24.1	575.9
4	3	First stage	1	OPN4 4	04/03/2015	600	151200 - 151800 s	29.6	570.5
4	3	First stage	1	OPN4 4	04/03/2015	600	151800 - 152400 s	1	599
4	3	First stage	1	OPN4 4	04/03/2015	600	152400 - 153000 s	53.4	546.6
4	3	First stage	1	OPN4 4	04/03/2015	600	153000 - 153600 s	0.5	599.5
4	3	First stage	1	OPN4 4	04/03/2015	600	153600 - 154200 s	419.2	180.9
4	3	First stage	1	OPN4 4	04/03/2015	600	154200 - 154800 s	499.5	100.5
4	3	First stage	1	OPN4 4	04/03/2015	600	154800 - 155400 s	158.7	441.3
4	3	First stage	1	OPN4 4	04/03/2015	600	155400 - 156000 s	38.5	561.5
4	3	First stage	1	OPN4 4	04/03/2015	600	156000 - 156600 s	27.6	572.4
4	3	First stage	1	OPN4 4	04/03/2015	600	156600 - 157200 s	62.7	537.3
4	3	First stage	1	OPN4 4	04/03/2015	600	157200 - 157800 s	46.1	553.9
4	3	First stage	1	OPN4 4	04/03/2015	600	157800 - 158400 s	33.5	566.5
4	3	First stage	1	OPN4 4	04/03/2015	600	158400 - 159000 s	52	548
4	3	First stage	1	OPN4 4	04/03/2015	600	159000 - 159600 s	18.6	581.4
4	3	First stage	1	OPN4 4	04/03/2015	600	159600 - 160200 s	21.2	578.8
4	3	First stage	1	OPN4 4	04/03/2015	600	160200 - 160800 s	0.5	599.5
4	3	First stage	1	OPN4 4	04/03/2015	600	160800 - 161400 s	593.2	6.8
4	3	First stage	1	OPN4 4	04/03/2015	600	161400 - 162000 s	600	0
4	3	First stage	1	OPN4 4	04/03/2015	600	162000 - 162600 s	600	0
4	3	First stage	1	OPN4 4	04/03/2015	600	162600 - 163200 s	600	0
4	3	First stage	1	OPN4 4	04/03/2015	600	163200 - 163800 s	600	0
4	3	First stage	1	OPN4 4	04/03/2015	600	163800 - 164400 s	44.2	555.8
4	3	First stage	1	OPN4 4	04/03/2015	600	164400 - 165000 s	1.6	598.4
4	3	First stage	1	OPN4 4	04/03/2015	600	165000 - 165600 s	21.5	578.5
4	3	First stage	1	OPN4 4	04/03/2015	600	165600 - 166200 s	18.9	581.1
4	3	First stage	1	OPN4 4	04/03/2015	600	166200 - 166800 s	57.6	542.4
4	3	First stage	1	OPN4 4	04/03/2015	600	166800 - 167400 s	76.2	523.8
4	3	First stage	1	OPN4 4	04/03/2015	600	167400 - 168000 s	10	590
4	3	First stage	1	OPN4 4	04/03/2015	600	168000 - 168600 s	501.9	98.1
4	3	First stage	1	OPN4 4	04/03/2015	600	168600 - 169200 s	502.8	97.2
4	3	First stage	1	OPN4 4	04/03/2015	600	169200 - 169800 s	600	0
4	3	First stage	1	OPN4 4	04/03/2015	600	169800 - 170400 s	158	442
4	3	First stage	1	OPN4 4	04/03/2015	600	170400 - 171000 s	266.8	333.2
4	3	First stage	1	OPN4 4	04/03/2015	600	171000 - 171600 s	600	0
4	3	First stage	1	OPN4 4	04/03/2015	600	171600 - 172200 s	73.1	526.9
4	3	First stage	1	OPN4 4	04/03/2015	600	172200 - 172800 s	152.3	447.7
4	3	First stage	1	OPN4 4	04/03/2015	600	172800 - 173400 s	367.3	232.7
4	3	First stage	1	OPN4 4	04/03/2015	600	173400 - 174000 s	508.6	91.4
4	3	First stage	1	OPN4 4	04/03/2015	600	174000 - 174600 s	136.7	463.3
4	3	First stage	1	OPN4 4	04/03/2015	600	174600 - 175200 s	80.4	519.6
4	3	First stage	1	OPN4 4	04/03/2015	600	175200 - 175800 s	496.7	103.4
4	3	First stage	1	OPN4 4	04/03/2015	600	175800 - 176400 s	476.9	123.1
4	3	First stage	1	OPN4 4	04/03/2015	600	176400 - 177000 s	140.8	459.2
4	3	First stage	1	OPN4 4	04/03/2015	600	177000 - 177600 s	585.1	15
4	3	First stage	1	OPN4 4	04/03/2015	600	177600 - 178200 s	600	0
4	3	First stage	1	OPN4 4	04/03/2015	600	178200 - 178800 s	600	0
4	3	First stage	1	OPN4 4	04/03/2015	600	178800 - 179400 s	600	0
4	3	First stage	1	OPN4 4	04/03/2015	600	179400 - 180000 s	600	0
4	3	First stage	1	OPN4 4	04/03/2015	600	180000 - 180600 s	600	0
4	3	First stage	1	OPN4 4	04/03/2015	600	180600 - 181200 s	600	0
4	3	First stage	1	OPN4 4	04/03/2015	600	181200 - 181800 s	600	0
4	3	First stage	1	OPN4 4	04/03/2015	600	181800 - 182400 s	600	0
4	3	First stage	1	OPN4 4	04/03/2015	600	182400 - 183000 s	600	0
4	3	First stage	1	OPN4 4	04/03/2015	600	183000 - 183600 s	600	0
4	3	First stage	1	OPN4 4	04/03/2015	600	183600 - 184200 s	600	0
4	3	First stage	1	OPN4 4	04/03/2015	600	184200 - 184800 s	556.8	43.2
4	3	First stage	1	OPN4 4	04/03/2015	600	184800 - 185400 s	420.1	180
4	3	First stage	1	OPN4 4	04/03/2015	600	185400 - 186000 s	567.6	32.5
4	3	First stage	1	OPN4 4	04/03/2015	600	186000 - 186600 s	600	0
4	3	First stage	1	OPN4 4	04/03/2015	600	186600 - 187200 s	600	0
4	3	First stage	1	OPN4 4	04/03/2015	600	187200 - 187800 s	600	0
4	3	First stage	1	OPN4 4	04/03/2015	600	187800 - 188400 s	600	0
4	3	First stage	1	OPN4 4	04/03/2015	600	188400 - 189000 s	600	0
4	3	First stage	1	OPN4 4	04/03/2015	600	189000 - 189600 s	600	0
4	3	First stage	1	OPN4 4	04/03/2015	600	189600 - 190200 s	600	0
4	3	First stage	1	OPN4 4	04/03/2015	600	190200 - 190800 s	600	0
4	3	First stage	1	OPN4 4	04/03/2015	600	190800 - 191400 s	600	0
4	3	First stage	1	OPN4 4	04/03/2015	600	191400 - 192000 s	600	0
4	3	First stage	1	OPN4 4	04/03/2015	600	192000 - 192600 s	600	0
4	3	First stage	1	OPN4 4	04/03/2015	600	192600 - 193200 s	600	0
4	3	First stage	1	OPN4 4	04/03/2015	600	193200 - 193800 s	600	0
4	3	First stage	1	OPN4 4	04/03/2015	600	193800 - 194400 s	56	544
4	3	First stage	1	OPN4 4	04/03/2015	600	194400 - 195000 s	22.4	577.6
4	3	First stage	1	OPN4 4	04/03/2015	600	195000 - 195600 s	49.3	550.7
4	3	First stage	1	OPN4 4	04/03/2015	600	195600 - 196200 s	0	600
4	3	First stage	1	OPN4 4	04/03/2015	600	196200 - 196800 s	32.8	567.2
4	3	First stage	1	OPN4 4	04/03/2015	600	196800 - 197400 s	58.1	541.9
4	3	First stage	1	OPN4 4	04/03/2015	600	197400 - 198000 s	26.2	573.8
4	3	First stage	1	OPN4 4	04/03/2015	600	198000 - 198600 s	338.4	261.6
4	3	First stage	1	OPN4 4	04/03/2015	600	198600 - 199200 s	136.9	463.1
4	3	First stage	1	OPN4 4	04/03/2015	600	199200 - 199800 s	600	0
4	3	First stage	1	OPN4 4	04/03/2015	600	199800 - 200400 s	600	0
4	3	First stage	1	OPN4 4	04/03/2015	600	200400 - 201000 s	600	0
4	3	First stage	1	OPN4 4	04/03/2015	600	201000 - 201600 s	600	0
4	3	First stage	1	OPN4 4	04/03/2015	600	201600 - 202200 s	600	0
4	3	First stage	1	OPN4 4	04/03/2015	600	202200 - 202800 s	600	0
4	3	First stage	1	OPN4 4	04/03/2015	600	202800 - 203400 s	600	0
4	3	First stage	1	OPN4 4	04/03/2015	600	203400 - 204000 s	83.4	516.6
4	3	First stage	1	OPN4 4	04/03/2015	600	204000 - 204600 s	90.1	509.9
4	3	First stage	1	OPN4 4	04/03/2015	600	204600 - 205200 s	78.2	521.8
4	3	First stage	1	OPN4 4	04/03/2015	600	205200 - 205800 s	29.5	570.5
4	3	First stage	1	OPN4 4	04/03/2015	600	205800 - 206400 s	53	547
4	3	First stage	1	OPN4 4	04/03/2015	600	206400 - 207000 s	151.9	448.1
4	3	First stage	1	OPN4 4	04/03/2015	600	207000 - 207600 s	0.5	599.5
4	3	First stage	1	OPN4 4	04/03/2015	600	207600 - 208200 s	0.5	599.5
4	3	First stage	1	OPN4 4	04/03/2015	600	208200 - 208800 s	58.1	541.9
4	3	First stage	1	OPN4 4	04/03/2015	600	208800 - 209400 s	600	0
4	3	First stage	1	OPN4 4	04/03/2015	600	209400 - 210000 s	600	0
4	3	First stage	1	OPN4 4	04/03/2015	600	210000 - 210600 s	600	0
4	3	First stage	1	OPN4 4	04/03/2015	600	210600 - 211200 s	600	0
4	3	First stage	1	OPN4 4	04/03/2015	600	211200 - 211800 s	600	0
4	3	First stage	1	OPN4 4	04/03/2015	600	211800 - 212400 s	600	0
4	3	First stage	1	OPN4 4	04/03/2015	600	212400 - 213000 s	482.7	117.3
4	3	First stage	1	OPN4 4	04/03/2015	600	213000 - 213600 s	59.5	540.5
4	3	First stage	1	OPN4 4	04/03/2015	600	213600 - 214200 s	111.7	488.3
4	3	First stage	1	OPN4 4	04/03/2015	600	214200 - 214800 s	61.4	538.7
4	3	First stage	1	OPN4 4	04/03/2015	600	214800 - 215400 s	10	590
4	3	First stage	1	OPN4 4	04/03/2015	600	215400 - 216000 s	48.6	551.4
1	1	First stage	1	OPN4 5	2015-02-03	600	0 - 600 secs.	600	0
1	1	First stage	1	OPN4 5	2015-02-03	600	600 - 1200 secs.	600	0
1	1	First stage	1	OPN4 5	2015-02-03	600	1200 - 1800 secs.	600	0
1	1	First stage	1	OPN4 5	2015-02-03	600	1800 - 2400 secs.	600	0
1	1	First stage	1	OPN4 5	2015-02-03	600	2400 - 3000 secs.	600	0
1	1	First stage	1	OPN4 5	2015-02-03	600	3000 - 3600 secs.	600	0
1	1	First stage	1	OPN4 5	2015-02-03	600	3600 - 4200 secs.	600	0
1	1	First stage	1	OPN4 5	2015-02-03	600	4200 - 4800 secs.	600	0
1	1	First stage	1	OPN4 5	2015-02-03	600	4800 - 5400 secs.	353.4	246.6
1	1	First stage	1	OPN4 5	2015-02-03	600	5400 - 6000 secs.	600	0
1	1	First stage	1	OPN4 5	2015-02-03	600	6000 - 6600 secs.	600	0
1	1	First stage	1	OPN4 5	2015-02-03	600	6600 - 7200 secs.	600	0
1	1	First stage	1	OPN4 5	2015-02-03	600	7200 - 7800 secs.	600	0
1	1	First stage	1	OPN4 5	2015-02-03	600	7800 - 8400 secs.	600	0
1	1	First stage	1	OPN4 5	2015-02-03	600	8400 - 9000 secs.	600	0
1	1	First stage	1	OPN4 5	2015-02-03	600	9000 - 9600 secs.	600	0
1	1	First stage	1	OPN4 5	2015-02-03	600	9600 - 10200 secs	600	0
1	1	First stage	1	OPN4 5	2015-02-03	600	10200 - 10800 sec	600	0
1	1	First stage	1	OPN4 5	2015-02-03	600	10800 - 11400 sec	600	0
1	1	First stage	1	OPN4 5	2015-02-03	600	11400 - 12000 sec	600	0
1	1	First stage	1	OPN4 5	2015-02-03	600	12000 - 12600 sec	546.5	53.5
1	1	First stage	1	OPN4 5	2015-02-03	600	12600 - 13200 sec	600	0
1	1	First stage	1	OPN4 5	2015-02-03	600	13200 - 13800 sec	600	0
1	1	First stage	1	OPN4 5	2015-02-03	600	13800 - 14400 sec	600	0
1	1	First stage	1	OPN4 5	2015-02-03	600	14400 - 15000 sec	600	0
1	1	First stage	1	OPN4 5	2015-02-03	600	15000 - 15600 sec	600	0
1	1	First stage	1	OPN4 5	2015-02-03	600	15600 - 16200 sec	600	0
1	1	First stage	1	OPN4 5	2015-02-03	600	16200 - 16800 sec	600	0
1	1	First stage	1	OPN4 5	2015-02-03	600	16800 - 17400 sec	600	0
1	1	First stage	1	OPN4 5	2015-02-03	600	17400 - 18000 sec	600	0
1	1	First stage	1	OPN4 5	2015-02-03	600	18000 - 18600 sec	600	0
1	1	First stage	1	OPN4 5	2015-02-03	600	18600 - 19200 sec	600	0
1	1	First stage	1	OPN4 5	2015-02-03	600	19200 - 19800 sec	600	0
1	1	First stage	1	OPN4 5	2015-02-03	600	19800 - 20400 sec	600	0
1	1	First stage	1	OPN4 5	2015-02-03	600	20400 - 21000 sec	600	0
1	1	First stage	1	OPN4 5	2015-02-03	600	21000 - 21600 sec	600	0
1	1	First stage	1	OPN4 5	2015-02-03	600	21600 - 22200 sec	600	0
1	1	First stage	1	OPN4 5	2015-02-03	600	22200 - 22800 sec	29.7	570.3
1	1	First stage	1	OPN4 5	2015-02-03	600	22800 - 23400 sec	39.8	560.2
1	1	First stage	1	OPN4 5	2015-02-03	600	23400 - 24000 sec	0	600
1	1	First stage	1	OPN4 5	2015-02-03	600	24000 - 24600 sec	281.8	318.2
1	1	First stage	1	OPN4 5	2015-02-03	600	24600 - 25200 sec	15.3	584.7
1	1	First stage	1	OPN4 5	2015-02-03	600	25800 - 26400 sec	59.9	540.1
1	1	First stage	1	OPN4 5	2015-02-03	600	26400 - 27000 sec	75.5	524.5
1	1	First stage	1	OPN4 5	2015-02-03	600	27000 - 27600 sec	280.9	319.1
1	1	First stage	1	OPN4 5	2015-02-03	600	27600 - 28200 sec	600	0
1	1	First stage	1	OPN4 5	2015-02-03	600	28200 - 28800 sec	600	0
1	1	First stage	1	OPN4 5	2015-02-03	600	28800 - 29400 sec	600	0
1	1	First stage	1	OPN4 5	2015-02-03	600	29400 - 30000 sec	503.8	96.2
1	1	First stage	1	OPN4 5	2015-02-03	600	30000 - 30600 sec	600	0
1	1	First stage	1	OPN4 5	2015-02-03	600	30600 - 31200 sec	327.5	272.5
1	1	First stage	1	OPN4 5	2015-02-03	600	31200 - 31800 sec	66.7	533.3
1	1	First stage	1	OPN4 5	2015-02-03	600	31800 - 32400 sec	93.2	506.8
1	1	First stage	1	OPN4 5	2015-02-03	600	32400 - 33000 sec	86.3	513.7
1	1	First stage	1	OPN4 5	2015-02-03	600	33000 - 33600 sec	29.3	570.7
1	1	First stage	1	OPN4 5	2015-02-03	600	33600 - 34200 sec	46.8	553.2
1	1	First stage	1	OPN4 5	2015-02-03	600	34200 - 34800 sec	24.5	575.5
1	1	First stage	1	OPN4 5	2015-02-03	600	34800 - 35400 sec	540.9	59.1
1	1	First stage	1	OPN4 5	2015-02-03	600	35400 - 36000 sec	600	0
1	1	First stage	1	OPN4 5	2015-02-03	600	36000 - 36600 sec	600	0
1	1	First stage	1	OPN4 5	2015-02-03	600	36600 - 37200 sec	600	0
1	1	First stage	1	OPN4 5	2015-02-03	600	37200 - 37800 sec	600	0
1	1	First stage	1	OPN4 5	2015-02-03	600	37800 - 38400 sec	600	0
1	1	First stage	1	OPN4 5	2015-02-03	600	38400 - 39000 sec	32.2	567.8
1	1	First stage	1	OPN4 5	2015-02-03	600	39000 - 39600 sec	49.6	550.4
1	1	First stage	1	OPN4 5	2015-02-03	600	39600 - 40200 sec	0	600
1	1	First stage	1	OPN4 5	2015-02-03	600	40200 - 40800 sec	2	598
1	1	First stage	1	OPN4 5	2015-02-03	600	40800 - 41400 sec	18.4	581.6
1	1	First stage	1	OPN4 5	2015-02-03	600	41400 - 42000 sec	0	600
1	1	First stage	1	OPN4 5	2015-02-03	600	42000 - 42600 sec	10.2	589.8
1	1	First stage	1	OPN4 5	2015-02-03	600	42600 - 43200 sec	31.9	568.1
1	1	First stage	1	OPN4 5	2015-02-03	600	43200 - 43800 sec	33	567
1	1	First stage	1	OPN4 5	2015-02-03	600	43800 - 44400 sec	18.1	581.9
1	1	First stage	1	OPN4 5	2015-02-03	600	44400 - 45000 sec	0	600
1	1	First stage	1	OPN4 5	2015-02-03	600	45000 - 45600 sec	31.4	568.6
1	1	First stage	1	OPN4 5	2015-02-03	600	45600 - 46200 sec	86.6	513.4
1	1	First stage	1	OPN4 5	2015-02-03	600	46200 - 46800 sec	7.1	592.9
1	1	First stage	1	OPN4 5	2015-02-03	600	46800 - 47400 sec	1	599
1	1	First stage	1	OPN4 5	2015-02-03	600	47400 - 48000 sec	61.3	538.7
1	1	First stage	1	OPN4 5	2015-02-03	600	48000 - 48600 sec	569.4	30.6
1	1	First stage	1	OPN4 5	2015-02-03	600	48600 - 49200 sec	218.2	381.8
1	1	First stage	1	OPN4 5	2015-02-03	600	49200 - 49800 sec	13.1	586.9
1	1	First stage	1	OPN4 5	2015-02-03	600	49800 - 50400 sec	34.7	565.3
1	1	First stage	1	OPN4 5	2015-02-03	600	50400 - 51000 sec	27.2	572.8
1	1	First stage	1	OPN4 5	2015-02-03	600	51000 - 51600 sec	77.2	522.8
1	1	First stage	1	OPN4 5	2015-02-03	600	51600 - 52200 sec	10.2	589.8
1	1	First stage	1	OPN4 5	2015-02-03	600	52200 - 52800 sec	38	562
1	1	First stage	1	OPN4 5	2015-02-03	600	52800 - 53400 sec	0	600
1	1	First stage	1	OPN4 5	2015-02-03	600	53400 - 54000 sec	14.1	585.9
1	1	First stage	1	OPN4 5	2015-02-03	600	54000 - 54600 sec	4	596
1	1	First stage	1	OPN4 5	2015-02-03	600	54600 - 55200 sec	284.5	315.5
1	1	First stage	1	OPN4 5	2015-02-03	600	55200 - 55800 sec	396.6	203.4
1	1	First stage	1	OPN4 5	2015-02-03	600	55800 - 56400 sec	450.3	149.7
1	1	First stage	1	OPN4 5	2015-02-03	600	56400 - 57000 sec	18.2	581.8
1	1	First stage	1	OPN4 5	2015-02-03	600	57000 - 57600 sec	8.5	591.5
1	1	First stage	1	OPN4 5	2015-02-03	600	57600 - 58200 sec	0	600
1	1	First stage	1	OPN4 5	2015-02-03	600	58200 - 58800 sec	2	598
1	1	First stage	1	OPN4 5	2015-02-03	600	58800 - 59400 sec	1	599
1	1	First stage	1	OPN4 5	2015-02-03	600	59400 - 60000 sec	10.1	589.9
1	1	First stage	1	OPN4 5	2015-02-03	600	60000 - 60600 sec	8.2	591.8
1	1	First stage	1	OPN4 5	2015-02-03	600	60600 - 61200 sec	46.7	553.3
1	1	First stage	1	OPN4 5	2015-02-03	600	61200 - 61800 sec	27.5	572.5
1	1	First stage	1	OPN4 5	2015-02-03	600	61800 - 62400 sec	61.8	538.2
1	1	First stage	1	OPN4 5	2015-02-03	600	62400 - 63000 sec	66.7	533.3
1	1	First stage	1	OPN4 5	2015-02-03	600	63000 - 63600 sec	5	595
1	1	First stage	1	OPN4 5	2015-02-03	600	63600 - 64200 sec	64.2	535.8
1	1	First stage	1	OPN4 5	2015-02-03	600	64200 - 64800 sec	36.2	563.8
1	1	First stage	1	OPN4 5	2015-02-03	600	64800 - 65400 sec	0	600
1	1	First stage	1	OPN4 5	2015-02-03	600	65400 - 66000 sec	0	600
1	1	First stage	1	OPN4 5	2015-02-03	600	66000 - 66600 sec	253.6	346.4
1	1	First stage	1	OPN4 5	2015-02-03	600	66600 - 67200 sec	534.4	65.6
1	1	First stage	1	OPN4 5	2015-02-03	600	67200 - 67800 sec	600	0
1	1	First stage	1	OPN4 5	2015-02-03	600	67800 - 68400 sec	517.2	82.8
1	1	First stage	1	OPN4 5	2015-02-03	600	68400 - 69000 sec	487.4	112.6
1	1	First stage	1	OPN4 5	2015-02-03	600	69000 - 69600 sec	70.8	529.2
1	1	First stage	1	OPN4 5	2015-02-03	600	69600 - 70200 sec	1	599
1	1	First stage	1	OPN4 5	2015-02-03	600	70200 - 70800 sec	54.8	545.2
1	1	First stage	1	OPN4 5	2015-02-03	600	70800 - 71400 sec	4	596
1	1	First stage	1	OPN4 5	2015-02-03	600	71400 - 72000 sec	0	600
1	1	First stage	1	OPN4 5	2015-02-03	600	72000 - 72600 sec	0	600
1	1	First stage	1	OPN4 5	2015-02-03	600	72600 - 73200 sec	24.1	575.9
1	1	First stage	1	OPN4 5	2015-02-03	600	73200 - 73800 sec	37.8	562.2
1	1	First stage	1	OPN4 5	2015-02-03	600	73800 - 74400 sec	558.6	41.4
1	1	First stage	1	OPN4 5	2015-02-03	600	74400 - 75000 sec	504.9	95.1
1	1	First stage	1	OPN4 5	2015-02-03	600	75000 - 75600 sec	553.5	46.5
1	1	First stage	1	OPN4 5	2015-02-03	600	75600 - 76200 sec	533.9	66.1
1	1	First stage	1	OPN4 5	2015-02-03	600	76200 - 76800 sec	37.2	562.8
1	1	First stage	1	OPN4 5	2015-02-03	600	76800 - 77400 sec	59.6	540.4
1	1	First stage	1	OPN4 5	2015-02-03	600	77400 - 78000 sec	9.1	590.9
1	1	First stage	1	OPN4 5	2015-02-03	600	78000 - 78600 sec	7	593
1	1	First stage	1	OPN4 5	2015-02-03	600	78600 - 79200 sec	5	595
1	1	First stage	1	OPN4 5	2015-02-03	600	79200 - 79800 sec	32.8	567.2
1	1	First stage	1	OPN4 5	2015-02-03	600	79800 - 80400 sec	1	599
1	1	First stage	1	OPN4 5	2015-02-03	600	80400 - 81000 sec	310.4	289.6
1	1	First stage	1	OPN4 5	2015-02-03	600	81000 - 81600 sec	506.9	93.1
1	1	First stage	1	OPN4 5	2015-02-03	600	81600 - 82200 sec	132.6	467.4
1	1	First stage	1	OPN4 5	2015-02-03	600	82200 - 82800 sec	10.2	589.8
1	1	First stage	1	OPN4 5	2015-02-03	600	82800 - 83400 sec	14.1	585.9
1	1	First stage	1	OPN4 5	2015-02-03	600	83400 - 84000 sec	580.9	19.1
1	1	First stage	1	OPN4 5	2015-02-03	600	84000 - 84600 sec	425.8	174.2
1	1	First stage	1	OPN4 5	2015-02-03	600	84600 - 85200 sec	394.8	205.2
1	1	First stage	1	OPN4 5	2015-02-03	600	85200 - 85800 sec	570.1	29.9
1	1	First stage	1	OPN4 5	2015-02-03	600	85800 - 86400 sec	600	0
1	1	First stage	1	OPN4 5	2015-02-03	600	86400 - 87000 sec	600	0
1	1	First stage	1	OPN4 5	2015-02-03	600	87000 - 87600 sec	51.8	548.2
1	1	First stage	1	OPN4 5	2015-02-03	600	87600 - 88200 sec	600	0
1	1	First stage	1	OPN4 5	2015-02-03	600	88200 - 88800 sec	600	0
1	1	First stage	1	OPN4 5	2015-02-03	600	88800 - 89400 sec	600	0
1	1	First stage	1	OPN4 5	2015-02-03	600	89400 - 90000 sec	600	0
1	1	First stage	1	OPN4 5	2015-02-03	600	90000 - 90600 sec	600	0
1	1	First stage	1	OPN4 5	2015-02-03	600	90600 - 91200 sec	600	0
1	1	First stage	1	OPN4 5	2015-02-03	600	91200 - 91800 sec	600	0
1	1	First stage	1	OPN4 5	2015-02-03	600	91800 - 92400 sec	600	0
1	1	First stage	1	OPN4 5	2015-02-03	600	92400 - 93000 sec	600	0
1	1	First stage	1	OPN4 5	2015-02-03	600	93000 - 93600 sec	600	0
1	1	First stage	1	OPN4 5	2015-02-03	600	93600 - 94200 sec	600	0
1	1	First stage	1	OPN4 5	2015-02-03	600	94200 - 94800 sec	39.5	560.5
1	1	First stage	1	OPN4 5	2015-02-03	600	94800 - 95400 sec	397.6	202.4
1	1	First stage	1	OPN4 5	2015-02-03	600	95400 - 96000 sec	311.2	288.8
1	1	First stage	1	OPN4 5	2015-02-03	600	96000 - 96600 sec	417.4	182.6
1	1	First stage	1	OPN4 5	2015-02-03	600	96600 - 97200 sec	600	0
1	1	First stage	1	OPN4 5	2015-02-03	600	97200 - 97800 sec	419.1	180.9
1	1	First stage	1	OPN4 5	2015-02-03	600	97800 - 98400 sec	600	0
1	1	First stage	1	OPN4 5	2015-02-03	600	98400 - 99000 sec	600	0
1	1	First stage	1	OPN4 5	2015-02-03	600	99000 - 99600 sec	600	0
1	1	First stage	1	OPN4 5	2015-02-03	600	99600 - 100200 se	539.2	60.8
1	1	First stage	1	OPN4 5	2015-02-03	600	100200 - 100800 s	600	0
1	1	First stage	1	OPN4 5	2015-02-03	600	100800 - 101400 s	600	0
1	1	First stage	1	OPN4 5	2015-02-03	600	101400 - 102000 s	600	0
1	1	First stage	1	OPN4 5	2015-02-03	600	102000 - 102600 s	600	0
1	1	First stage	1	OPN4 5	2015-02-03	600	102600 - 103200 s	600	0
1	1	First stage	1	OPN4 5	2015-02-03	600	103200 - 103800 s	600	0
1	1	First stage	1	OPN4 5	2015-02-03	600	103800 - 104400 s	600	0
1	1	First stage	1	OPN4 5	2015-02-03	600	104400 - 105000 s	600	0
1	1	First stage	1	OPN4 5	2015-02-03	600	105000 - 105600 s	600	0
1	1	First stage	1	OPN4 5	2015-02-03	600	105600 - 106200 s	600	0
1	1	First stage	1	OPN4 5	2015-02-03	600	106200 - 106800 s	600	0
1	1	First stage	1	OPN4 5	2015-02-03	600	106800 - 107400 s	600	0
1	1	First stage	1	OPN4 5	2015-02-03	600	107400 - 108000 s	600	0
1	1	First stage	1	OPN4 5	2015-02-03	600	108000 - 108600 s	600	0
1	1	First stage	1	OPN4 5	2015-02-03	600	108600 - 109200 s	253.7	346.3
1	1	First stage	1	OPN4 5	2015-02-03	600	109200 - 109800 s	457.4	142.6
1	1	First stage	1	OPN4 5	2015-02-03	600	109800 - 110400 s	600	0
1	1	First stage	1	OPN4 5	2015-02-03	600	110400 - 111000 s	260	340
1	1	First stage	1	OPN4 5	2015-02-03	600	111000 - 111600 s	59.6	540.4
1	1	First stage	1	OPN4 5	2015-02-03	600	111600 - 112200 s	64.7	535.3
1	1	First stage	1	OPN4 5	2015-02-03	600	112200 - 112800 s	20.2	579.8
1	1	First stage	1	OPN4 5	2015-02-03	600	112800 - 113400 s	26.4	573.6
1	1	First stage	1	OPN4 5	2015-02-03	600	113400 - 114000 s	82.2	517.8
1	1	First stage	1	OPN4 5	2015-02-03	600	114000 - 114600 s	48.1	551.9
1	1	First stage	1	OPN4 5	2015-02-03	600	114600 - 115200 s	70.7	529.3
1	1	First stage	1	OPN4 5	2015-02-03	600	115200 - 115800 s	256.3	343.7
1	1	First stage	1	OPN4 5	2015-02-03	600	115800 - 116400 s	34.3	565.7
1	1	First stage	1	OPN4 5	2015-02-03	600	116400 - 117000 s	35.4	564.6
1	1	First stage	1	OPN4 5	2015-02-03	600	117000 - 117600 s	195.5	404.5
1	1	First stage	1	OPN4 5	2015-02-03	600	117600 - 118200 s	600	0
1	1	First stage	1	OPN4 5	2015-02-03	600	118200 - 118800 s	600	0
1	1	First stage	1	OPN4 5	2015-02-03	600	118800 - 119400 s	600	0
1	1	First stage	1	OPN4 5	2015-02-03	600	119400 - 120000 s	600	0
1	1	First stage	1	OPN4 5	2015-02-03	600	120000 - 120600 s	600	0
1	1	First stage	1	OPN4 5	2015-02-03	600	120600 - 121200 s	600	0
1	1	First stage	1	OPN4 5	2015-02-03	600	121200 - 121800 s	600	0
1	1	First stage	1	OPN4 5	2015-02-03	600	121800 - 122400 s	514.5	85.5
1	1	First stage	1	OPN4 5	2015-02-03	600	122400 - 123000 s	37.1	562.9
1	1	First stage	1	OPN4 5	2015-02-03	600	123000 - 123600 s	97.1	502.9
1	1	First stage	1	OPN4 5	2015-02-03	600	123600 - 124200 s	30.3	569.7
1	1	First stage	1	OPN4 5	2015-02-03	600	124200 - 124800 s	49.9	550.1
1	1	First stage	1	OPN4 5	2015-02-03	600	124800 - 125400 s	216.1	383.9
1	1	First stage	1	OPN4 5	2015-02-03	600	125400 - 126000 s	600	0
1	1	First stage	1	OPN4 5	2015-02-03	600	126000 - 126600 s	600	0
1	1	First stage	1	OPN4 5	2015-02-03	600	126600 - 127200 s	600	0
1	1	First stage	1	OPN4 5	2015-02-03	600	127200 - 127800 s	395	205
1	1	First stage	1	OPN4 5	2015-02-03	600	127800 - 128400 s	90.2	509.8
1	1	First stage	1	OPN4 5	2015-02-03	600	128400 - 129000 s	39.4	560.6
1	1	First stage	1	OPN4 5	2015-02-03	600	129000 - 129600 s	44.7	555.3
1	1	First stage	1	OPN4 5	2015-02-03	600	129600 - 130200 s	1	599
1	1	First stage	1	OPN4 5	2015-02-03	600	130200 - 130800 s	0	600
1	1	First stage	1	OPN4 5	2015-02-03	600	130800 - 131400 s	39.3	560.7
1	1	First stage	1	OPN4 5	2015-02-03	600	131400 - 132000 s	12.2	587.8
1	1	First stage	1	OPN4 5	2015-02-03	600	132000 - 132600 s	17.2	582.8
1	1	First stage	1	OPN4 5	2015-02-03	600	132600 - 133200 s	29.5	570.5
1	1	First stage	1	OPN4 5	2015-02-03	600	133200 - 133800 s	86.3	513.7
1	1	First stage	1	OPN4 5	2015-02-03	600	133800 - 134400 s	11	589
1	1	First stage	1	OPN4 5	2015-02-03	600	134400 - 135000 s	116.4	483.6
1	1	First stage	1	OPN4 5	2015-02-03	600	135000 - 135600 s	600	0
1	1	First stage	1	OPN4 5	2015-02-03	600	135600 - 136200 s	453.8	146.2
1	1	First stage	1	OPN4 5	2015-02-03	600	136200 - 136800 s	27.7	572.3
1	1	First stage	1	OPN4 5	2015-02-03	600	136800 - 137400 s	74.9	525.1
1	1	First stage	1	OPN4 5	2015-02-03	600	137400 - 138000 s	31.1	568.9
1	1	First stage	1	OPN4 5	2015-02-03	600	138000 - 138600 s	50.4	549.6
1	1	First stage	1	OPN4 5	2015-02-03	600	138600 - 139200 s	54.6	545.4
1	1	First stage	1	OPN4 5	2015-02-03	600	139200 - 139800 s	1	599
1	1	First stage	1	OPN4 5	2015-02-03	600	139800 - 140400 s	81.8	518.2
1	1	First stage	1	OPN4 5	2015-02-03	600	140400 - 141000 s	47.8	552.2
1	1	First stage	1	OPN4 5	2015-02-03	600	141000 - 141600 s	1	599
1	1	First stage	1	OPN4 5	2015-02-03	600	141600 - 142200 s	52.8	547.2
1	1	First stage	1	OPN4 5	2015-02-03	600	142200 - 142800 s	4	596
1	1	First stage	1	OPN4 5	2015-02-03	600	142800 - 143400 s	46.5	553.5
1	1	First stage	1	OPN4 5	2015-02-03	600	143400 - 144000 s	526.4	73.6
1	1	First stage	1	OPN4 5	2015-02-03	600	144000 - 144600 s	600	0
1	1	First stage	1	OPN4 5	2015-02-03	600	144600 - 145200 s	538.6	61.4
1	1	First stage	1	OPN4 5	2015-02-03	600	145200 - 145800 s	29.3	570.7
1	1	First stage	1	OPN4 5	2015-02-03	600	145800 - 146400 s	5.2	594.8
1	1	First stage	1	OPN4 5	2015-02-03	600	146400 - 147000 s	60.4	539.6
1	1	First stage	1	OPN4 5	2015-02-03	600	147000 - 147600 s	23.1	576.9
1	1	First stage	1	OPN4 5	2015-02-03	600	147600 - 148200 s	0	600
1	1	First stage	1	OPN4 5	2015-02-03	600	148200 - 148800 s	28.7	571.3
1	1	First stage	1	OPN4 5	2015-02-03	600	148800 - 149400 s	64.9	535.1
1	1	First stage	1	OPN4 5	2015-02-03	600	149400 - 150000 s	25.2	574.8
1	1	First stage	1	OPN4 5	2015-02-03	600	150000 - 150600 s	154.9	445.1
1	1	First stage	1	OPN4 5	2015-02-03	600	150600 - 151200 s	12.1	587.9
1	1	First stage	1	OPN4 5	2015-02-03	600	151200 - 151800 s	302.8	297.2
1	1	First stage	1	OPN4 5	2015-02-03	600	151800 - 152400 s	171.5	428.5
1	1	First stage	1	OPN4 5	2015-02-03	600	152400 - 153000 s	79.2	520.8
1	1	First stage	1	OPN4 5	2015-02-03	600	153000 - 153600 s	11.3	588.7
1	1	First stage	1	OPN4 5	2015-02-03	600	153600 - 154200 s	124.6	475.4
1	1	First stage	1	OPN4 5	2015-02-03	600	154200 - 154800 s	1	599
1	1	First stage	1	OPN4 5	2015-02-03	600	154800 - 155400 s	50.4	549.6
1	1	First stage	1	OPN4 5	2015-02-03	600	155400 - 156000 s	50.6	549.4
1	1	First stage	1	OPN4 5	2015-02-03	600	156000 - 156600 s	80.9	519.1
1	1	First stage	1	OPN4 5	2015-02-03	600	156600 - 157200 s	43.2	556.8
1	1	First stage	1	OPN4 5	2015-02-03	600	157200 - 157800 s	1	599
1	1	First stage	1	OPN4 5	2015-02-03	600	157800 - 158400 s	1	599
1	1	First stage	1	OPN4 5	2015-02-03	600	158400 - 159000 s	520.9	79.1
1	1	First stage	1	OPN4 5	2015-02-03	600	159000 - 159600 s	600	0
1	1	First stage	1	OPN4 5	2015-02-03	600	159600 - 160200 s	462.4	137.6
1	1	First stage	1	OPN4 5	2015-02-03	600	160200 - 160800 s	67.7	532.3
1	1	First stage	1	OPN4 5	2015-02-03	600	160800 - 161400 s	64.7	535.3
1	1	First stage	1	OPN4 5	2015-02-03	600	161400 - 162000 s	108.4	491.6
1	1	First stage	1	OPN4 5	2015-02-03	600	162000 - 162600 s	72.8	527.2
1	1	First stage	1	OPN4 5	2015-02-03	600	162600 - 163200 s	48.2	551.8
1	1	First stage	1	OPN4 5	2015-02-03	600	163200 - 163800 s	21.2	578.8
1	1	First stage	1	OPN4 5	2015-02-03	600	163800 - 164400 s	0	600
1	1	First stage	1	OPN4 5	2015-02-03	600	164400 - 165000 s	4.1	595.9
1	1	First stage	1	OPN4 5	2015-02-03	600	165000 - 165600 s	7	593
1	1	First stage	1	OPN4 5	2015-02-03	600	165600 - 166200 s	104.2	495.8
1	1	First stage	1	OPN4 5	2015-02-03	600	166200 - 166800 s	278.1	321.9
1	1	First stage	1	OPN4 5	2015-02-03	600	166800 - 167400 s	600	0
1	1	First stage	1	OPN4 5	2015-02-03	600	167400 - 168000 s	600	0
1	1	First stage	1	OPN4 5	2015-02-03	600	168000 - 168600 s	600	0
1	1	First stage	1	OPN4 5	2015-02-03	600	168600 - 169200 s	600	0
1	1	First stage	1	OPN4 5	2015-02-03	600	169200 - 169800 s	290.8	309.2
1	1	First stage	1	OPN4 5	2015-02-03	600	169800 - 170400 s	65.4	534.6
1	1	First stage	1	OPN4 5	2015-02-03	600	170400 - 171000 s	95.9	504.1
1	1	First stage	1	OPN4 5	2015-02-03	600	171000 - 171600 s	428.4	171.6
1	1	First stage	1	OPN4 5	2015-02-03	600	171600 - 172200 s	218	382
1	1	First stage	1	OPN4 5	2015-02-03	600	172200 - 172800 s	212.8	387.2
1	1	First stage	1	OPN4 5	2015-02-03	600	172800 - 173400 s	115.7	484.3
1	1	First stage	1	OPN4 5	2015-02-03	600	173400 - 174000 s	407.6	192.4
1	1	First stage	1	OPN4 5	2015-02-03	600	174000 - 174600 s	0	600
1	1	First stage	1	OPN4 5	2015-02-03	600	174600 - 175200 s	514.5	85.5
1	1	First stage	1	OPN4 5	2015-02-03	600	175200 - 175800 s	554.5	45.5
1	1	First stage	1	OPN4 5	2015-02-03	600	175800 - 176400 s	600	0
1	1	First stage	1	OPN4 5	2015-02-03	600	176400 - 177000 s	518.2	81.8
1	1	First stage	1	OPN4 5	2015-02-03	600	177000 - 177600 s	600	0
1	1	First stage	1	OPN4 5	2015-02-03	600	177600 - 178200 s	600	0
1	1	First stage	1	OPN4 5	2015-02-03	600	178200 - 178800 s	600	0
1	1	First stage	1	OPN4 5	2015-02-03	600	178800 - 179400 s	600	0
1	1	First stage	1	OPN4 5	2015-02-03	600	179400 - 180000 s	600	0
1	1	First stage	1	OPN4 5	2015-02-03	600	180000 - 180600 s	549.5	50.5
1	1	First stage	1	OPN4 5	2015-02-03	600	180600 - 181200 s	600	0
1	1	First stage	1	OPN4 5	2015-02-03	600	181200 - 181800 s	600	0
1	1	First stage	1	OPN4 5	2015-02-03	600	181800 - 182400 s	600	0
1	1	First stage	1	OPN4 5	2015-02-03	600	182400 - 183000 s	600	0
1	1	First stage	1	OPN4 5	2015-02-03	600	183000 - 183600 s	541.2	58.8
1	1	First stage	1	OPN4 5	2015-02-03	600	183600 - 184200 s	600	0
1	1	First stage	1	OPN4 5	2015-02-03	600	184200 - 184800 s	554.2	45.8
1	1	First stage	1	OPN4 5	2015-02-03	600	184800 - 185400 s	571.3	28.7
1	1	First stage	1	OPN4 5	2015-02-03	600	185400 - 186000 s	535.4	64.6
1	1	First stage	1	OPN4 5	2015-02-03	600	186000 - 186600 s	600	0
1	1	First stage	1	OPN4 5	2015-02-03	600	186600 - 187200 s	600	0
1	1	First stage	1	OPN4 5	2015-02-03	600	187200 - 187800 s	600	0
1	1	First stage	1	OPN4 5	2015-02-03	600	187800 - 188400 s	600	0
1	1	First stage	1	OPN4 5	2015-02-03	600	188400 - 189000 s	600	0
1	1	First stage	1	OPN4 5	2015-02-03	600	189000 - 189600 s	600	0
1	1	First stage	1	OPN4 5	2015-02-03	600	189600 - 190200 s	600	0
1	1	First stage	1	OPN4 5	2015-02-03	600	190200 - 190800 s	600	0
1	1	First stage	1	OPN4 5	2015-02-03	600	190800 - 191400 s	600	0
1	1	First stage	1	OPN4 5	2015-02-03	600	191400 - 192000 s	545.6	54.4
1	1	First stage	1	OPN4 5	2015-02-03	600	192000 - 192600 s	548.6	51.4
1	1	First stage	1	OPN4 5	2015-02-03	600	192600 - 193200 s	600	0
1	1	First stage	1	OPN4 5	2015-02-03	600	193200 - 193800 s	600	0
1	1	First stage	1	OPN4 5	2015-02-03	600	193800 - 194400 s	600	0
1	1	First stage	1	OPN4 5	2015-02-03	600	194400 - 195000 s	600	0
1	1	First stage	1	OPN4 5	2015-02-03	600	195000 - 195600 s	600	0
1	1	First stage	1	OPN4 5	2015-02-03	600	195600 - 196200 s	595.5	4.5
1	1	First stage	1	OPN4 5	2015-02-03	600	196200 - 196800 s	514.1	85.9
1	1	First stage	1	OPN4 5	2015-02-03	600	196800 - 197400 s	339.8	260.2
1	1	First stage	1	OPN4 5	2015-02-03	600	197400 - 198000 s	137	463
1	1	First stage	1	OPN4 5	2015-02-03	600	198000 - 198600 s	109	491
1	1	First stage	1	OPN4 5	2015-02-03	600	198600 - 199200 s	54	546
1	1	First stage	1	OPN4 5	2015-02-03	600	199200 - 199800 s	68.9	531.1
1	1	First stage	1	OPN4 5	2015-02-03	600	199800 - 200400 s	7.2	592.8
1	1	First stage	1	OPN4 5	2015-02-03	600	200400 - 201000 s	231.4	368.6
1	1	First stage	1	OPN4 5	2015-02-03	600	201000 - 201600 s	600	0
1	1	First stage	1	OPN4 5	2015-02-03	600	201600 - 202200 s	600	0
1	1	First stage	1	OPN4 5	2015-02-03	600	202200 - 202800 s	600	0
1	1	First stage	1	OPN4 5	2015-02-03	600	202800 - 203400 s	600	0
1	1	First stage	1	OPN4 5	2015-02-03	600	203400 - 204000 s	600	0
1	1	First stage	1	OPN4 5	2015-02-03	600	204000 - 204600 s	600	0
1	1	First stage	1	OPN4 5	2015-02-03	600	204600 - 205200 s	600	0
1	1	First stage	1	OPN4 5	2015-02-03	600	205200 - 205800 s	376.7	223.3
1	1	First stage	1	OPN4 5	2015-02-03	600	205800 - 206400 s	68.1	531.9
1	1	First stage	1	OPN4 5	2015-02-03	600	206400 - 207000 s	7.9	592.1
1	1	First stage	1	OPN4 5	2015-02-03	600	207000 - 207600 s	15.4	584.6
1	1	First stage	1	OPN4 5	2015-02-03	600	207600 - 208200 s	30.3	569.7
1	1	First stage	1	OPN4 5	2015-02-03	600	208200 - 208800 s	26.4	573.6
1	1	First stage	1	OPN4 5	2015-02-03	600	208800 - 209400 s	0	600
1	1	First stage	1	OPN4 5	2015-02-03	600	209400 - 210000 s	38.4	561.6
1	1	First stage	1	OPN4 5	2015-02-03	600	210000 - 210600 s	142.6	457.4
1	1	First stage	1	OPN4 5	2015-02-03	600	210600 - 211200 s	495.8	104.2
1	1	First stage	1	OPN4 5	2015-02-03	600	211200 - 211800 s	600	0
1	1	First stage	1	OPN4 5	2015-02-03	600	211800 - 212400 s	600	0
1	1	First stage	1	OPN4 5	2015-02-03	600	212400 - 213000 s	555.4	44.6
1	1	First stage	1	OPN4 5	2015-02-03	600	213000 - 213600 s	493.4	106.6
1	1	First stage	1	OPN4 5	2015-02-03	600	213600 - 214200 s	52.5	547.5
1	1	First stage	1	OPN4 5	2015-02-03	600	214200 - 214800 s	2	598
1	1	First stage	1	OPN4 5	2015-02-03	600	214800 - 215400 s	63.2	536.8
1	1	First stage	1	OPN4 5	2015-02-03	600	215400 - 216000 s	13.3	586.7
2	2	First stage	1	OPN4 5	2015-02-03	600	0 - 600 secs.	53.6	546.4
2	2	First stage	1	OPN4 6	2015-02-03	600	600 - 1200 secs.	600	0
2	2	First stage	1	OPN4 6	2015-02-03	600	1200 - 1800 secs.	600	0
2	2	First stage	1	OPN4 6	2015-02-03	600	1800 - 2400 secs.	600	0
2	2	First stage	1	OPN4 6	2015-02-03	600	2400 - 3000 secs.	600	0
2	2	First stage	1	OPN4 6	2015-02-03	600	3000 - 3600 secs.	600	0
2	2	First stage	1	OPN4 6	2015-02-03	600	3600 - 4200 secs.	600	0
2	2	First stage	1	OPN4 6	2015-02-03	600	4200 - 4800 secs.	600	0
2	2	First stage	1	OPN4 6	2015-02-03	600	4800 - 5400 secs.	600	0
2	2	First stage	1	OPN4 6	2015-02-03	600	5400 - 6000 secs.	600	0
2	2	First stage	1	OPN4 6	2015-02-03	600	6000 - 6600 secs.	538.7	61.3
2	2	First stage	1	OPN4 6	2015-02-03	600	6600 - 7200 secs.	513.3	86.7
2	2	First stage	1	OPN4 6	2015-02-03	600	7200 - 7800 secs.	600	0
2	2	First stage	1	OPN4 6	2015-02-03	600	7800 - 8400 secs.	600	0
2	2	First stage	1	OPN4 6	2015-02-03	600	8400 - 9000 secs.	600	0
2	2	First stage	1	OPN4 6	2015-02-03	600	9000 - 9600 secs.	600	0
2	2	First stage	1	OPN4 6	2015-02-03	600	9600 - 10200 secs	600	0
2	2	First stage	1	OPN4 6	2015-02-03	600	10200 - 10800 sec	485.6	114.4
2	2	First stage	1	OPN4 6	2015-02-03	600	10800 - 11400 sec	600	0
2	2	First stage	1	OPN4 6	2015-02-03	600	11400 - 12000 sec	600	0
2	2	First stage	1	OPN4 6	2015-02-03	600	12000 - 12600 sec	316.8	283.2
2	2	First stage	1	OPN4 6	2015-02-03	600	12600 - 13200 sec	449	151
2	2	First stage	1	OPN4 6	2015-02-03	600	13200 - 13800 sec	600	0
2	2	First stage	1	OPN4 6	2015-02-03	600	13800 - 14400 sec	600	0
2	2	First stage	1	OPN4 6	2015-02-03	600	14400 - 15000 sec	600	0
2	2	First stage	1	OPN4 6	2015-02-03	600	15000 - 15600 sec	600	0
2	2	First stage	1	OPN4 6	2015-02-03	600	15600 - 16200 sec	600	0
2	2	First stage	1	OPN4 6	2015-02-03	600	16200 - 16800 sec	520.2	79.8
2	2	First stage	1	OPN4 6	2015-02-03	600	16800 - 17400 sec	376.9	223.1
2	2	First stage	1	OPN4 6	2015-02-03	600	17400 - 18000 sec	600	0
2	2	First stage	1	OPN4 6	2015-02-03	600	18000 - 18600 sec	600	0
2	2	First stage	1	OPN4 6	2015-02-03	600	18600 - 19200 sec	600	0
2	2	First stage	1	OPN4 6	2015-02-03	600	19200 - 19800 sec	600	0
2	2	First stage	1	OPN4 6	2015-02-03	600	19800 - 20400 sec	600	0
2	2	First stage	1	OPN4 6	2015-02-03	600	20400 - 21000 sec	519.1	80.9
2	2	First stage	1	OPN4 6	2015-02-03	600	21000 - 21600 sec	261.8	338.2
2	2	First stage	1	OPN4 6	2015-02-03	600	21600 - 22200 sec	59.9	540.1
2	2	First stage	1	OPN4 6	2015-02-03	600	22200 - 22800 sec	436.8	163.2
2	2	First stage	1	OPN4 6	2015-02-03	600	22800 - 23400 sec	600	0
2	2	First stage	1	OPN4 6	2015-02-03	600	23400 - 24000 sec	446	154
2	2	First stage	1	OPN4 6	2015-02-03	600	24000 - 24600 sec	40.6	559.4
2	2	First stage	1	OPN4 6	2015-02-03	600	24600 - 25200 sec	15.1	584.9
2	2	First stage	1	OPN4 6	2015-02-03	600	25800 - 26400 sec	32.2	567.8
2	2	First stage	1	OPN4 6	2015-02-03	600	26400 - 27000 sec	112.3	487.7
2	2	First stage	1	OPN4 6	2015-02-03	600	27000 - 27600 sec	386.8	213.2
2	2	First stage	1	OPN4 6	2015-02-03	600	27600 - 28200 sec	600	0
2	2	First stage	1	OPN4 6	2015-02-03	600	28200 - 28800 sec	600	0
2	2	First stage	1	OPN4 6	2015-02-03	600	28800 - 29400 sec	600	0
2	2	First stage	1	OPN4 6	2015-02-03	600	29400 - 30000 sec	600	0
2	2	First stage	1	OPN4 6	2015-02-03	600	30000 - 30600 sec	600	0
2	2	First stage	1	OPN4 6	2015-02-03	600	30600 - 31200 sec	600	0
2	2	First stage	1	OPN4 6	2015-02-03	600	31200 - 31800 sec	218.6	381.4
2	2	First stage	1	OPN4 6	2015-02-03	600	31800 - 32400 sec	34.6	565.4
2	2	First stage	1	OPN4 6	2015-02-03	600	32400 - 33000 sec	83.7	516.3
2	2	First stage	1	OPN4 6	2015-02-03	600	33000 - 33600 sec	67	533
2	2	First stage	1	OPN4 6	2015-02-03	600	33600 - 34200 sec	497.8	102.2
2	2	First stage	1	OPN4 6	2015-02-03	600	34200 - 34800 sec	600	0
2	2	First stage	1	OPN4 6	2015-02-03	600	34800 - 35400 sec	600	0
2	2	First stage	1	OPN4 6	2015-02-03	600	35400 - 36000 sec	600	0
2	2	First stage	1	OPN4 6	2015-02-03	600	36000 - 36600 sec	600	0
2	2	First stage	1	OPN4 6	2015-02-03	600	36600 - 37200 sec	600	0
2	2	First stage	1	OPN4 6	2015-02-03	600	37200 - 37800 sec	226	374
2	2	First stage	1	OPN4 6	2015-02-03	600	37800 - 38400 sec	38.4	561.6
2	2	First stage	1	OPN4 6	2015-02-03	600	38400 - 39000 sec	28	572
2	2	First stage	1	OPN4 6	2015-02-03	600	39000 - 39600 sec	556.1	43.9
2	2	First stage	1	OPN4 6	2015-02-03	600	39600 - 40200 sec	600	0
2	2	First stage	1	OPN4 6	2015-02-03	600	40200 - 40800 sec	566	34
2	2	First stage	1	OPN4 6	2015-02-03	600	40800 - 41400 sec	23.4	576.6
2	2	First stage	1	OPN4 6	2015-02-03	600	41400 - 42000 sec	26.2	573.8
2	2	First stage	1	OPN4 6	2015-02-03	600	42000 - 42600 sec	2	598
2	2	First stage	1	OPN4 6	2015-02-03	600	42600 - 43200 sec	10	590
2	2	First stage	1	OPN4 6	2015-02-03	600	43200 - 43800 sec	28.7	571.3
2	2	First stage	1	OPN4 6	2015-02-03	600	43800 - 44400 sec	30.3	569.7
2	2	First stage	1	OPN4 6	2015-02-03	600	44400 - 45000 sec	0	600
2	2	First stage	1	OPN4 6	2015-02-03	600	45000 - 45600 sec	68.8	531.2
2	2	First stage	1	OPN4 6	2015-02-03	600	45600 - 46200 sec	72	528
2	2	First stage	1	OPN4 6	2015-02-03	600	46200 - 46800 sec	4.1	595.9
2	2	First stage	1	OPN4 6	2015-02-03	600	46800 - 47400 sec	330.5	269.5
2	2	First stage	1	OPN4 6	2015-02-03	600	47400 - 48000 sec	524.7	75.3
2	2	First stage	1	OPN4 6	2015-02-03	600	48000 - 48600 sec	0	600
2	2	First stage	1	OPN4 6	2015-02-03	600	48600 - 49200 sec	18.2	581.8
2	2	First stage	1	OPN4 6	2015-02-03	600	49200 - 49800 sec	51.2	548.8
2	2	First stage	1	OPN4 6	2015-02-03	600	49800 - 50400 sec	68.4	531.6
2	2	First stage	1	OPN4 6	2015-02-03	600	50400 - 51000 sec	84.2	515.8
2	2	First stage	1	OPN4 6	2015-02-03	600	51000 - 51600 sec	59.8	540.2
2	2	First stage	1	OPN4 6	2015-02-03	600	51600 - 52200 sec	57.8	542.2
2	2	First stage	1	OPN4 6	2015-02-03	600	52200 - 52800 sec	481.8	118.2
2	2	First stage	1	OPN4 6	2015-02-03	600	52800 - 53400 sec	600	0
2	2	First stage	1	OPN4 6	2015-02-03	600	53400 - 54000 sec	600	0
2	2	First stage	1	OPN4 6	2015-02-03	600	54000 - 54600 sec	549.5	50.5
2	2	First stage	1	OPN4 6	2015-02-03	600	54600 - 55200 sec	341.1	258.9
2	2	First stage	1	OPN4 6	2015-02-03	600	55200 - 55800 sec	7	593
2	2	First stage	1	OPN4 6	2015-02-03	600	55800 - 56400 sec	47.8	552.2
2	2	First stage	1	OPN4 6	2015-02-03	600	56400 - 57000 sec	32.7	567.3
2	2	First stage	1	OPN4 6	2015-02-03	600	57000 - 57600 sec	96.9	503.1
2	2	First stage	1	OPN4 6	2015-02-03	600	57600 - 58200 sec	13.3	586.7
2	2	First stage	1	OPN4 6	2015-02-03	600	58200 - 58800 sec	66.8	533.2
2	2	First stage	1	OPN4 6	2015-02-03	600	58800 - 59400 sec	30.3	569.7
2	2	First stage	1	OPN4 6	2015-02-03	600	59400 - 60000 sec	46.4	553.6
2	2	First stage	1	OPN4 6	2015-02-03	600	60000 - 60600 sec	10	590
2	2	First stage	1	OPN4 6	2015-02-03	600	60600 - 61200 sec	7	593
2	2	First stage	1	OPN4 6	2015-02-03	600	61200 - 61800 sec	176.2	423.8
2	2	First stage	1	OPN4 6	2015-02-03	600	61800 - 62400 sec	600	0
2	2	First stage	1	OPN4 6	2015-02-03	600	62400 - 63000 sec	135.9	464.1
2	2	First stage	1	OPN4 6	2015-02-03	600	63000 - 63600 sec	13.1	586.9
2	2	First stage	1	OPN4 6	2015-02-03	600	63600 - 64200 sec	45.3	554.7
2	2	First stage	1	OPN4 6	2015-02-03	600	64200 - 64800 sec	24.1	575.9
2	2	First stage	1	OPN4 6	2015-02-03	600	64800 - 65400 sec	5	595
2	2	First stage	1	OPN4 6	2015-02-03	600	65400 - 66000 sec	20.1	579.9
2	2	First stage	1	OPN4 6	2015-02-03	600	66000 - 66600 sec	101.2	498.8
2	2	First stage	1	OPN4 6	2015-02-03	600	66600 - 67200 sec	44.6	555.4
2	2	First stage	1	OPN4 6	2015-02-03	600	67200 - 67800 sec	155.8	444.2
2	2	First stage	1	OPN4 6	2015-02-03	600	67800 - 68400 sec	44.3	555.7
2	2	First stage	1	OPN4 6	2015-02-03	600	68400 - 69000 sec	144.3	455.7
2	2	First stage	1	OPN4 6	2015-02-03	600	69000 - 69600 sec	41.5	558.5
2	2	First stage	1	OPN4 6	2015-02-03	600	69600 - 70200 sec	11	589
2	2	First stage	1	OPN4 6	2015-02-03	600	70200 - 70800 sec	243.8	356.2
2	2	First stage	1	OPN4 6	2015-02-03	600	70800 - 71400 sec	600	0
2	2	First stage	1	OPN4 6	2015-02-03	600	71400 - 72000 sec	594	6
2	2	First stage	1	OPN4 6	2015-02-03	600	72000 - 72600 sec	63.6	536.4
2	2	First stage	1	OPN4 6	2015-02-03	600	72600 - 73200 sec	60.4	539.6
2	2	First stage	1	OPN4 6	2015-02-03	600	73200 - 73800 sec	11.1	588.9
2	2	First stage	1	OPN4 6	2015-02-03	600	73800 - 74400 sec	152.5	447.5
2	2	First stage	1	OPN4 6	2015-02-03	600	74400 - 75000 sec	32.3	567.7
2	2	First stage	1	OPN4 6	2015-02-03	600	75000 - 75600 sec	83.5	516.5
2	2	First stage	1	OPN4 6	2015-02-03	600	75600 - 76200 sec	600	0
2	2	First stage	1	OPN4 6	2015-02-03	600	76200 - 76800 sec	600	0
2	2	First stage	1	OPN4 6	2015-02-03	600	76800 - 77400 sec	600	0
2	2	First stage	1	OPN4 6	2015-02-03	600	77400 - 78000 sec	323.3	276.7
2	2	First stage	1	OPN4 6	2015-02-03	600	78000 - 78600 sec	48.8	551.2
2	2	First stage	1	OPN4 6	2015-02-03	600	78600 - 79200 sec	62.6	537.4
2	2	First stage	1	OPN4 6	2015-02-03	600	79200 - 79800 sec	12.1	587.9
2	2	First stage	1	OPN4 6	2015-02-03	600	79800 - 80400 sec	34.1	565.9
2	2	First stage	1	OPN4 6	2015-02-03	600	80400 - 81000 sec	1	599
2	2	First stage	1	OPN4 6	2015-02-03	600	81000 - 81600 sec	40.1	559.9
2	2	First stage	1	OPN4 6	2015-02-03	600	81600 - 82200 sec	16.2	583.8
2	2	First stage	1	OPN4 6	2015-02-03	600	82200 - 82800 sec	5	595
2	2	First stage	1	OPN4 6	2015-02-03	600	82800 - 83400 sec	460.9	139.1
2	2	First stage	1	OPN4 6	2015-02-03	600	83400 - 84000 sec	600	0
2	2	First stage	1	OPN4 6	2015-02-03	600	84000 - 84600 sec	529.6	70.4
2	2	First stage	1	OPN4 6	2015-02-03	600	84600 - 85200 sec	286.6	313.4
2	2	First stage	1	OPN4 6	2015-02-03	600	85200 - 85800 sec	87.2	512.8
2	2	First stage	1	OPN4 6	2015-02-03	600	85800 - 86400 sec	117.8	482.2
2	2	First stage	1	OPN4 6	2015-02-03	600	86400 - 87000 sec	600	0
2	2	First stage	1	OPN4 6	2015-02-03	600	87000 - 87600 sec	541.9	58.1
2	2	First stage	1	OPN4 6	2015-02-03	600	87600 - 88200 sec	428.1	171.9
2	2	First stage	1	OPN4 6	2015-02-03	600	88200 - 88800 sec	600	0
2	2	First stage	1	OPN4 6	2015-02-03	600	88800 - 89400 sec	600	0
2	2	First stage	1	OPN4 6	2015-02-03	600	89400 - 90000 sec	600	0
2	2	First stage	1	OPN4 6	2015-02-03	600	90000 - 90600 sec	600	0
2	2	First stage	1	OPN4 6	2015-02-03	600	90600 - 91200 sec	600	0
2	2	First stage	1	OPN4 6	2015-02-03	600	91200 - 91800 sec	600	0
2	2	First stage	1	OPN4 6	2015-02-03	600	91800 - 92400 sec	600	0
2	2	First stage	1	OPN4 6	2015-02-03	600	92400 - 93000 sec	600	0
2	2	First stage	1	OPN4 6	2015-02-03	600	93000 - 93600 sec	600	0
2	2	First stage	1	OPN4 6	2015-02-03	600	93600 - 94200 sec	600	0
2	2	First stage	1	OPN4 6	2015-02-03	600	94200 - 94800 sec	600	0
2	2	First stage	1	OPN4 6	2015-02-03	600	94800 - 95400 sec	113.2	486.8
2	2	First stage	1	OPN4 6	2015-02-03	600	95400 - 96000 sec	40.6	559.4
2	2	First stage	1	OPN4 6	2015-02-03	600	96000 - 96600 sec	113.2	486.8
2	2	First stage	1	OPN4 6	2015-02-03	600	96600 - 97200 sec	40.6	559.4
2	2	First stage	1	OPN4 6	2015-02-03	600	97200 - 97800 sec	231.2	368.8
2	2	First stage	1	OPN4 6	2015-02-03	600	97800 - 98400 sec	144.3	455.7
2	2	First stage	1	OPN4 6	2015-02-03	600	98400 - 99000 sec	600	0
2	2	First stage	1	OPN4 6	2015-02-03	600	99000 - 99600 sec	600	0
2	2	First stage	1	OPN4 6	2015-02-03	600	99600 - 100200 se	600	0
2	2	First stage	1	OPN4 6	2015-02-03	600	100200 - 100800 s	600	0
2	2	First stage	1	OPN4 6	2015-02-03	600	100800 - 101400 s	600	0
2	2	First stage	1	OPN4 6	2015-02-03	600	101400 - 102000 s	600	0
2	2	First stage	1	OPN4 6	2015-02-03	600	102000 - 102600 s	600	0
2	2	First stage	1	OPN4 6	2015-02-03	600	102600 - 103200 s	600	0
2	2	First stage	1	OPN4 6	2015-02-03	600	103200 - 103800 s	600	0
2	2	First stage	1	OPN4 6	2015-02-03	600	103800 - 104400 s	600	0
2	2	First stage	1	OPN4 6	2015-02-03	600	104400 - 105000 s	600	0
2	2	First stage	1	OPN4 6	2015-02-03	600	105000 - 105600 s	600	0
2	2	First stage	1	OPN4 6	2015-02-03	600	105600 - 106200 s	600	0
2	2	First stage	1	OPN4 6	2015-02-03	600	106200 - 106800 s	600	0
2	2	First stage	1	OPN4 6	2015-02-03	600	106800 - 107400 s	600	0
2	2	First stage	1	OPN4 6	2015-02-03	600	107400 - 108000 s	600	0
2	2	First stage	1	OPN4 6	2015-02-03	600	108000 - 108600 s	600	0
2	2	First stage	1	OPN4 6	2015-02-03	600	108600 - 109200 s	600	0
2	2	First stage	1	OPN4 6	2015-02-03	600	109200 - 109800 s	555.8	44.2
2	2	First stage	1	OPN4 6	2015-02-03	600	109800 - 110400 s	299.8	300.2
2	2	First stage	1	OPN4 6	2015-02-03	600	110400 - 111000 s	63.8	536.2
2	2	First stage	1	OPN4 6	2015-02-03	600	111000 - 111600 s	103	497
2	2	First stage	1	OPN4 6	2015-02-03	600	111600 - 112200 s	6	594
2	2	First stage	1	OPN4 6	2015-02-03	600	112200 - 112800 s	25.1	574.9
2	2	First stage	1	OPN4 6	2015-02-03	600	112800 - 113400 s	1	599
2	2	First stage	1	OPN4 6	2015-02-03	600	113400 - 114000 s	7	593
2	2	First stage	1	OPN4 6	2015-02-03	600	114000 - 114600 s	34.5	565.5
2	2	First stage	1	OPN4 6	2015-02-03	600	114600 - 115200 s	40.7	559.3
2	2	First stage	1	OPN4 6	2015-02-03	600	115200 - 115800 s	578	22
2	2	First stage	1	OPN4 6	2015-02-03	600	115800 - 116400 s	446.2	153.8
2	2	First stage	1	OPN4 6	2015-02-03	600	116400 - 117000 s	600	0
2	2	First stage	1	OPN4 6	2015-02-03	600	117000 - 117600 s	600	0
2	2	First stage	1	OPN4 6	2015-02-03	600	117600 - 118200 s	600	0
2	2	First stage	1	OPN4 6	2015-02-03	600	118200 - 118800 s	569.1	30.9
2	2	First stage	1	OPN4 6	2015-02-03	600	118800 - 119400 s	67.7	532.3
2	2	First stage	1	OPN4 6	2015-02-03	600	119400 - 120000 s	23.1	576.9
2	2	First stage	1	OPN4 6	2015-02-03	600	120000 - 120600 s	23	577
2	2	First stage	1	OPN4 6	2015-02-03	600	120600 - 121200 s	28.4	571.6
2	2	First stage	1	OPN4 6	2015-02-03	600	121200 - 121800 s	33.3	566.7
2	2	First stage	1	OPN4 6	2015-02-03	600	121800 - 122400 s	27	573
2	2	First stage	1	OPN4 6	2015-02-03	600	122400 - 123000 s	14.1	585.9
[truncated: 873 more rows]

## Sheet: Fig2B raw data WT 470nm pulse 
Test	Animal	Stage	Trial	Apparatus	Date	Duration	Segment of test	Time mobile	Time immobile
1	1	First stage	1	WT4	21/08/2013	600	0 - 600 secs.	600	0
1	1	First stage	1	WT4	21/08/2013	600	600 - 1200 secs.	600	0
1	1	First stage	1	WT4	21/08/2013	600	1200 - 1800 secs.	600	0
1	1	First stage	1	WT4	21/08/2013	600	1800 - 2400 secs.	600	0
1	1	First stage	1	WT4	21/08/2013	600	2400 - 3000 secs.	600	0
1	1	First stage	1	WT4	21/08/2013	600	3000 - 3600 secs.	600	0
1	1	First stage	1	WT4	21/08/2013	600	3600 - 4200 secs.	600	0
1	1	First stage	1	WT4	21/08/2013	600	4200 - 4800 secs.	600	0
1	1	First stage	1	WT4	21/08/2013	600	4800 - 5400 secs.	600	0
1	1	First stage	1	WT4	21/08/2013	600	5400 - 6000 secs.	600	0
1	1	First stage	1	WT4	21/08/2013	600	6000 - 6600 secs.	600	0
1	1	First stage	1	WT4	21/08/2013	600	6600 - 7200 secs.	600	0
1	1	First stage	1	WT4	21/08/2013	600	7200 - 7800 secs.	600	0
1	1	First stage	1	WT4	21/08/2013	600	7800 - 8400 secs.	600	0
1	1	First stage	1	WT4	21/08/2013	600	8400 - 9000 secs.	600	0
1	1	First stage	1	WT4	21/08/2013	600	9000 - 9600 secs.	600	0
1	1	First stage	1	WT4	21/08/2013	600	9600 - 10200 secs	600	0
1	1	First stage	1	WT4	21/08/2013	600	10200 - 10800 sec	600	0
1	1	First stage	1	WT4	21/08/2013	600	10800 - 11400 sec	600	0
1	1	First stage	1	WT4	21/08/2013	600	11400 - 12000 sec	600	0
1	1	First stage	1	WT4	21/08/2013	600	12000 - 12600 sec	600	0
1	1	First stage	1	WT4	21/08/2013	600	12600 - 13200 sec	600	0
1	1	First stage	1	WT4	21/08/2013	600	13200 - 13800 sec	600	0
1	1	First stage	1	WT4	21/08/2013	600	13800 - 14400 sec	600	0
1	1	First stage	1	WT4	21/08/2013	600	14400 - 15000 sec	174.1	425.9
1	1	First stage	1	WT4	21/08/2013	600	15000 - 15600 sec	274.8	325.2
1	1	First stage	1	WT4	21/08/2013	600	15600 - 16200 sec	445.3	154.7
1	1	First stage	1	WT4	21/08/2013	600	16200 - 16800 sec	361.1	238.9
1	1	First stage	1	WT4	21/08/2013	600	16800 - 17400 sec	600	0
1	1	First stage	1	WT4	21/08/2013	600	17400 - 18000 sec	600	0
1	1	First stage	1	WT4	21/08/2013	600	18000 - 18600 sec	600	0
1	1	First stage	1	WT4	21/08/2013	600	18600 - 19200 sec	600	0
1	1	First stage	1	WT4	21/08/2013	600	19200 - 19800 sec	600	0
1	1	First stage	1	WT4	21/08/2013	600	19800 - 20400 sec	600	0
1	1	First stage	1	WT4	21/08/2013	600	20400 - 21000 sec	346.9	253.1
1	1	First stage	1	WT4	21/08/2013	600	21000 - 21600 sec	118.1	481.9
1	1	First stage	1	WT4	21/08/2013	600	21600 - 22200 sec	93.8	506.2
1	1	First stage	1	WT4	21/08/2013	600	22200 - 22800 sec	192.4	407.6
1	1	First stage	1	WT4	21/08/2013	600	22800 - 23400 sec	600	0
1	1	First stage	1	WT4	21/08/2013	600	23400 - 24000 sec	600	0
1	1	First stage	1	WT4	21/08/2013	600	24000 - 24600 sec	600	0
1	1	First stage	1	WT4	21/08/2013	600	24600 - 25200 sec	600	0
1	1	First stage	1	WT4	21/08/2013	600	25200 - 25800 sec	600	0
1	1	First stage	1	WT4	21/08/2013	600	25800 - 26400 sec	600	0
1	1	First stage	1	WT4	21/08/2013	600	26400 - 27000 sec	600	0
1	1	First stage	1	WT4	21/08/2013	600	27000 - 27600 sec	245.4	354.6
1	1	First stage	1	WT4	21/08/2013	600	27600 - 28200 sec	149.1	450.9
1	1	First stage	1	WT4	21/08/2013	600	28200 - 28800 sec	77	523
1	1	First stage	1	WT4	21/08/2013	600	28800 - 29400 sec	234	366
1	1	First stage	1	WT4	21/08/2013	600	29400 - 30000 sec	148.4	451.6
1	1	First stage	1	WT4	21/08/2013	600	30000 - 30600 sec	218.5	381.5
1	1	First stage	1	WT4	21/08/2013	600	30600 - 31200 sec	519.8	80.2
1	1	First stage	1	WT4	21/08/2013	600	31200 - 31800 sec	600	0
1	1	First stage	1	WT4	21/08/2013	600	31800 - 32400 sec	600	0
1	1	First stage	1	WT4	21/08/2013	600	32400 - 33000 sec	600	0
1	1	First stage	1	WT4	21/08/2013	600	33000 - 33600 sec	600	0
1	1	First stage	1	WT4	21/08/2013	600	33600 - 34200 sec	600	0
1	1	First stage	1	WT4	21/08/2013	600	34200 - 34800 sec	600	0
1	1	First stage	1	WT4	21/08/2013	600	34800 - 35400 sec	600	0
1	1	First stage	1	WT4	21/08/2013	600	35400 - 36000 sec	600	0
1	1	First stage	1	WT4	21/08/2013	600	36000 - 36600 sec	303.4	296.6
1	1	First stage	1	WT4	21/08/2013	600	36600 - 37200 sec	72	528
1	1	First stage	1	WT4	21/08/2013	600	37200 - 37800 sec	86.5	513.6
1	1	First stage	1	WT4	21/08/2013	600	37800 - 38400 sec	41.6	558.4
1	1	First stage	1	WT4	21/08/2013	600	38400 - 39000 sec	541.8	58.3
1	1	First stage	1	WT4	21/08/2013	600	39000 - 39600 sec	533.6	66.4
1	1	First stage	1	WT4	21/08/2013	600	39600 - 40200 sec	600	0
1	1	First stage	1	WT4	21/08/2013	600	40200 - 40800 sec	600	0
1	1	First stage	1	WT4	21/08/2013	600	40800 - 41400 sec	600	0
1	1	First stage	1	WT4	21/08/2013	600	41400 - 42000 sec	174.8	425.3
1	1	First stage	1	WT4	21/08/2013	600	42000 - 42600 sec	71.4	528.6
1	1	First stage	1	WT4	21/08/2013	600	42600 - 43200 sec	90.1	509.9
1	1	First stage	1	WT4	21/08/2013	600	43200 - 43800 sec	173.2	426.8
1	1	First stage	1	WT4	21/08/2013	600	43800 - 44400 sec	17.2	582.8
1	1	First stage	1	WT4	21/08/2013	600	44400 - 45000 sec	109.7	490.3
1	1	First stage	1	WT4	21/08/2013	600	45000 - 45600 sec	82.2	517.8
1	1	First stage	1	WT4	21/08/2013	600	45600 - 46200 sec	111.8	488.2
1	1	First stage	1	WT4	21/08/2013	600	46200 - 46800 sec	16.7	583.3
1	1	First stage	1	WT4	21/08/2013	600	46800 - 47400 sec	58.2	541.8
1	1	First stage	1	WT4	21/08/2013	600	47400 - 48000 sec	78.2	521.8
1	1	First stage	1	WT4	21/08/2013	600	48000 - 48600 sec	128.8	471.2
1	1	First stage	1	WT4	21/08/2013	600	48600 - 49200 sec	339	261
1	1	First stage	1	WT4	21/08/2013	600	49200 - 49800 sec	600	0
1	1	First stage	1	WT4	21/08/2013	600	49800 - 50400 sec	600	0
1	1	First stage	1	WT4	21/08/2013	600	50400 - 51000 sec	188.3	411.7
1	1	First stage	1	WT4	21/08/2013	600	51000 - 51600 sec	67.5	532.5
1	1	First stage	1	WT4	21/08/2013	600	51600 - 52200 sec	99.2	500.8
1	1	First stage	1	WT4	21/08/2013	600	52200 - 52800 sec	55.3	544.7
1	1	First stage	1	WT4	21/08/2013	600	52800 - 53400 sec	38.5	561.5
1	1	First stage	1	WT4	21/08/2013	600	53400 - 54000 sec	129.7	470.3
1	1	First stage	1	WT4	21/08/2013	600	54000 - 54600 sec	71.2	528.8
1	1	First stage	1	WT4	21/08/2013	600	54600 - 55200 sec	126.2	473.8
1	1	First stage	1	WT4	21/08/2013	600	55200 - 55800 sec	74	526
1	1	First stage	1	WT4	21/08/2013	600	55800 - 56400 sec	42.5	557.5
1	1	First stage	1	WT4	21/08/2013	600	56400 - 57000 sec	20	580
1	1	First stage	1	WT4	21/08/2013	600	57000 - 57600 sec	94.7	505.3
1	1	First stage	1	WT4	21/08/2013	600	57600 - 58200 sec	19.8	580.2
1	1	First stage	1	WT4	21/08/2013	600	58200 - 58800 sec	153.5	446.5
1	1	First stage	1	WT4	21/08/2013	600	58800 - 59400 sec	438.8	161.2
1	1	First stage	1	WT4	21/08/2013	600	59400 - 60000 sec	108	492
1	1	First stage	1	WT4	21/08/2013	600	60000 - 60600 sec	127.5	472.5
1	1	First stage	1	WT4	21/08/2013	600	60600 - 61200 sec	145.6	454.4
1	1	First stage	1	WT4	21/08/2013	600	61200 - 61800 sec	118.7	481.3
1	1	First stage	1	WT4	21/08/2013	600	61800 - 62400 sec	61.8	538.2
1	1	First stage	1	WT4	21/08/2013	600	62400 - 63000 sec	151.4	448.6
1	1	First stage	1	WT4	21/08/2013	600	63000 - 63600 sec	90.9	509.1
1	1	First stage	1	WT4	21/08/2013	600	63600 - 64200 sec	153.3	446.7
1	1	First stage	1	WT4	21/08/2013	600	64200 - 64800 sec	600	0
1	1	First stage	1	WT4	21/08/2013	600	64800 - 65400 sec	505.9	94.1
1	1	First stage	1	WT4	21/08/2013	600	65400 - 66000 sec	266.8	333.2
1	1	First stage	1	WT4	21/08/2013	600	66000 - 66600 sec	85	515
1	1	First stage	1	WT4	21/08/2013	600	66600 - 67200 sec	31.4	568.6
1	1	First stage	1	WT4	21/08/2013	600	67200 - 67800 sec	126.4	473.6
1	1	First stage	1	WT4	21/08/2013	600	67800 - 68400 sec	199.6	400.4
1	1	First stage	1	WT4	21/08/2013	600	68400 - 69000 sec	59.1	541
1	1	First stage	1	WT4	21/08/2013	600	69000 - 69600 sec	162.4	437.6
1	1	First stage	1	WT4	21/08/2013	600	69600 - 70200 sec	60.1	540
1	1	First stage	1	WT4	21/08/2013	600	70200 - 70800 sec	49.1	550.9
1	1	First stage	1	WT4	21/08/2013	600	70800 - 71400 sec	526.2	73.8
1	1	First stage	1	WT4	21/08/2013	600	71400 - 72000 sec	600	0
1	1	First stage	1	WT4	21/08/2013	600	72000 - 72600 sec	275.2	324.8
1	1	First stage	1	WT4	21/08/2013	600	72600 - 73200 sec	239.6	360.4
1	1	First stage	1	WT4	21/08/2013	600	73200 - 73800 sec	71.9	528.1
1	1	First stage	1	WT4	21/08/2013	600	73800 - 74400 sec	170.9	429.1
1	1	First stage	1	WT4	21/08/2013	600	74400 - 75000 sec	34.1	565.9
1	1	First stage	1	WT4	21/08/2013	600	75000 - 75600 sec	101.5	498.5
1	1	First stage	1	WT4	21/08/2013	600	75600 - 76200 sec	274.7	325.3
1	1	First stage	1	WT4	21/08/2013	600	76200 - 76800 sec	600	0
1	1	First stage	1	WT4	21/08/2013	600	76800 - 77400 sec	600	0
1	1	First stage	1	WT4	21/08/2013	600	77400 - 78000 sec	364.1	235.9
1	1	First stage	1	WT4	21/08/2013	600	78000 - 78600 sec	140.5	459.6
1	1	First stage	1	WT4	21/08/2013	600	78600 - 79200 sec	66.8	533.2
1	1	First stage	1	WT4	21/08/2013	600	79200 - 79800 sec	239.9	360.1
1	1	First stage	1	WT4	21/08/2013	600	79800 - 80400 sec	192.4	407.6
1	1	First stage	1	WT4	21/08/2013	600	80400 - 81000 sec	413.9	186.1
1	1	First stage	1	WT4	21/08/2013	600	81000 - 81600 sec	600	0
1	1	First stage	1	WT4	21/08/2013	600	81600 - 82200 sec	600	0
1	1	First stage	1	WT4	21/08/2013	600	82200 - 82800 sec	440.2	159.8
1	1	First stage	1	WT4	21/08/2013	600	82800 - 83400 sec	136.5	463.5
1	1	First stage	1	WT4	21/08/2013	600	83400 - 84000 sec	33.7	566.3
1	1	First stage	1	WT4	21/08/2013	600	84000 - 84600 sec	260.7	339.3
1	1	First stage	1	WT4	21/08/2013	600	84600 - 85200 sec	168.6	431.4
1	1	First stage	1	WT4	21/08/2013	600	85200 - 85800 sec	424.1	175.9
1	1	First stage	1	WT4	21/08/2013	600	85800 - 86400 sec	600	0
1	1	First stage	1	WT4	21/08/2013	600	86400 - 87000 sec	600	0
1	1	First stage	1	WT4	21/08/2013	600	87000 - 87600 sec	525.2	74.8
1	1	First stage	1	WT4	21/08/2013	600	87600 - 88200 sec	428.4	171.6
1	1	First stage	1	WT4	21/08/2013	600	88200 - 88800 sec	600	0
1	1	First stage	1	WT4	21/08/2013	600	88800 - 89400 sec	600	0
1	1	First stage	1	WT4	21/08/2013	600	89400 - 90000 sec	600	0
1	1	First stage	1	WT4	21/08/2013	600	90000 - 90600 sec	600	0
1	1	First stage	1	WT4	21/08/2013	600	90600 - 91200 sec	584.3	15.7
1	1	First stage	1	WT4	21/08/2013	600	91200 - 91800 sec	353	247
1	1	First stage	1	WT4	21/08/2013	600	91800 - 92400 sec	600	0
1	1	First stage	1	WT4	21/08/2013	600	92400 - 93000 sec	600	0
1	1	First stage	1	WT4	21/08/2013	600	93000 - 93600 sec	600	0
1	1	First stage	1	WT4	21/08/2013	600	93600 - 94200 sec	518.9	81.1
1	1	First stage	1	WT4	21/08/2013	600	94200 - 94800 sec	252.4	347.6
1	1	First stage	1	WT4	21/08/2013	600	94800 - 95400 sec	427.4	172.6
1	1	First stage	1	WT4	21/08/2013	600	95400 - 96000 sec	525.1	74.9
1	1	First stage	1	WT4	21/08/2013	600	96000 - 96600 sec	506	94
1	1	First stage	1	WT4	21/08/2013	600	96600 - 97200 sec	521.2	78.8
1	1	First stage	1	WT4	21/08/2013	600	97200 - 97800 sec	335.3	264.7
1	1	First stage	1	WT4	21/08/2013	600	97800 - 98400 sec	414.6	185.4
1	1	First stage	1	WT4	21/08/2013	600	98400 - 99000 sec	600	0
1	1	First stage	1	WT4	21/08/2013	600	99000 - 99600 sec	600	0
1	1	First stage	1	WT4	21/08/2013	600	99600 - 100200 se	600	0
1	1	First stage	1	WT4	21/08/2013	600	100200 - 100800 s	600	0
1	1	First stage	1	WT4	21/08/2013	600	100800 - 101400 s	600	0
1	1	First stage	1	WT4	21/08/2013	600	101400 - 102000 s	600	0
1	1	First stage	1	WT4	21/08/2013	600	102000 - 102600 s	495.4	104.6
1	1	First stage	1	WT4	21/08/2013	600	102600 - 103200 s	112.5	487.5
1	1	First stage	1	WT4	21/08/2013	600	103200 - 103800 s	101.6	498.4
1	1	First stage	1	WT4	21/08/2013	600	103800 - 104400 s	95.6	504.4
1	1	First stage	1	WT4	21/08/2013	600	104400 - 105000 s	391.6	208.5
1	1	First stage	1	WT4	21/08/2013	600	105000 - 105600 s	600	0
1	1	First stage	1	WT4	21/08/2013	600	105600 - 106200 s	600	0
1	1	First stage	1	WT4	21/08/2013	600	106200 - 106800 s	600	0
1	1	First stage	1	WT4	21/08/2013	600	106800 - 107400 s	600	0
1	1	First stage	1	WT4	21/08/2013	600	107400 - 108000 s	600	0
1	1	First stage	1	WT4	21/08/2013	600	108000 - 108600 s	600	0
1	1	First stage	1	WT4	21/08/2013	600	108600 - 109200 s	600	0
1	1	First stage	1	WT4	21/08/2013	600	109200 - 109800 s	600	0
1	1	First stage	1	WT4	21/08/2013	600	109800 - 110400 s	600	0
1	1	First stage	1	WT4	21/08/2013	600	110400 - 111000 s	600	0
1	1	First stage	1	WT4	21/08/2013	600	111000 - 111600 s	274.6	325.4
1	1	First stage	1	WT4	21/08/2013	600	111600 - 112200 s	122.9	477.1
1	1	First stage	1	WT4	21/08/2013	600	112200 - 112800 s	68.1	531.9
1	1	First stage	1	WT4	21/08/2013	600	112800 - 113400 s	46.8	553.2
1	1	First stage	1	WT4	21/08/2013	600	113400 - 114000 s	102.3	497.7
1	1	First stage	1	WT4	21/08/2013	600	114000 - 114600 s	342.1	257.9
1	1	First stage	1	WT4	21/08/2013	600	114600 - 115200 s	72.5	527.5
1	1	First stage	1	WT4	21/08/2013	600	115200 - 115800 s	449.9	150.1
1	1	First stage	1	WT4	21/08/2013	600	115800 - 116400 s	600	0
1	1	First stage	1	WT4	21/08/2013	600	116400 - 117000 s	600	0
1	1	First stage	1	WT4	21/08/2013	600	117000 - 117600 s	600	0
1	1	First stage	1	WT4	21/08/2013	600	117600 - 118200 s	600	0
1	1	First stage	1	WT4	21/08/2013	600	118200 - 118800 s	583	17
1	1	First stage	1	WT4	21/08/2013	600	118800 - 119400 s	88.4	511.6
1	1	First stage	1	WT4	21/08/2013	600	119400 - 120000 s	25.5	574.5
1	1	First stage	1	WT4	21/08/2013	600	120000 - 120600 s	94.7	505.3
1	1	First stage	1	WT4	21/08/2013	600	120600 - 121200 s	106.8	493.2
1	1	First stage	1	WT4	21/08/2013	600	121200 - 121800 s	95	505
1	1	First stage	1	WT4	21/08/2013	600	121800 - 122400 s	79	521
1	1	First stage	1	WT4	21/08/2013	600	122400 - 123000 s	107.6	492.4
1	1	First stage	1	WT4	21/08/2013	600	123000 - 123600 s	162.5	437.6
1	1	First stage	1	WT4	21/08/2013	600	123600 - 124200 s	241	359
1	1	First stage	1	WT4	21/08/2013	600	124200 - 124800 s	600	0
1	1	First stage	1	WT4	21/08/2013	600	124800 - 125400 s	600	0
1	1	First stage	1	WT4	21/08/2013	600	125400 - 126000 s	600	0
1	1	First stage	1	WT4	21/08/2013	600	126000 - 126600 s	212.2	387.8
1	1	First stage	1	WT4	21/08/2013	600	126600 - 127200 s	66	534
1	1	First stage	1	WT4	21/08/2013	600	127200 - 127800 s	6.4	593.6
1	1	First stage	1	WT4	21/08/2013	600	127800 - 128400 s	115.1	484.9
1	1	First stage	1	WT4	21/08/2013	600	128400 - 129000 s	113.4	486.6
1	1	First stage	1	WT4	21/08/2013	600	129000 - 129600 s	251.7	348.3
1	1	First stage	1	WT4	21/08/2013	600	129600 - 130200 s	600	0
1	1	First stage	1	WT4	21/08/2013	600	130200 - 130800 s	600	0
1	1	First stage	1	WT4	21/08/2013	600	130800 - 131400 s	196.5	403.5
1	1	First stage	1	WT4	21/08/2013	600	131400 - 132000 s	70.6	529.4
1	1	First stage	1	WT4	21/08/2013	600	132000 - 132600 s	54.9	545.1
1	1	First stage	1	WT4	21/08/2013	600	132600 - 133200 s	544	56
1	1	First stage	1	WT4	21/08/2013	600	133200 - 133800 s	484.6	115.4
1	1	First stage	1	WT4	21/08/2013	600	133800 - 134400 s	128.7	471.3
1	1	First stage	1	WT4	21/08/2013	600	134400 - 135000 s	56.6	543.4
1	1	First stage	1	WT4	21/08/2013	600	135000 - 135600 s	169	431
1	1	First stage	1	WT4	21/08/2013	600	135600 - 136200 s	134.3	465.7
1	1	First stage	1	WT4	21/08/2013	600	136200 - 136800 s	74.4	525.6
1	1	First stage	1	WT4	21/08/2013	600	136800 - 137400 s	79.7	520.3
1	1	First stage	1	WT4	21/08/2013	600	137400 - 138000 s	127.7	472.3
1	1	First stage	1	WT4	21/08/2013	600	138000 - 138600 s	220.7	379.3
1	1	First stage	1	WT4	21/08/2013	600	138600 - 139200 s	109.2	490.8
1	1	First stage	1	WT4	21/08/2013	600	139200 - 139800 s	79.7	520.3
1	1	First stage	1	WT4	21/08/2013	600	139800 - 140400 s	126.7	473.3
1	1	First stage	1	WT4	21/08/2013	600	140400 - 141000 s	82.6	517.5
1	1	First stage	1	WT4	21/08/2013	600	141000 - 141600 s	600	0
1	1	First stage	1	WT4	21/08/2013	600	141600 - 142200 s	600	0
1	1	First stage	1	WT4	21/08/2013	600	142200 - 142800 s	600	0
1	1	First stage	1	WT4	21/08/2013	600	142800 - 143400 s	181.9	418.1
1	1	First stage	1	WT4	21/08/2013	600	143400 - 144000 s	219.7	380.3
1	1	First stage	1	WT4	21/08/2013	600	144000 - 144600 s	182.7	417.3
1	1	First stage	1	WT4	21/08/2013	600	144600 - 145200 s	167.5	432.6
1	1	First stage	1	WT4	21/08/2013	600	145200 - 145800 s	74.5	525.5
1	1	First stage	1	WT4	21/08/2013	600	145800 - 146400 s	54.5	545.5
1	1	First stage	1	WT4	21/08/2013	600	146400 - 147000 s	122.9	477.1
1	1	First stage	1	WT4	21/08/2013	600	147000 - 147600 s	472.9	127.1
1	1	First stage	1	WT4	21/08/2013	600	147600 - 148200 s	585	15
1	1	First stage	1	WT4	21/08/2013	600	148200 - 148800 s	70.1	529.9
1	1	First stage	1	WT4	21/08/2013	600	148800 - 149400 s	68.6	531.4
1	1	First stage	1	WT4	21/08/2013	600	149400 - 150000 s	12.5	587.5
1	1	First stage	1	WT4	21/08/2013	600	150000 - 150600 s	181.5	418.6
1	1	First stage	1	WT4	21/08/2013	600	150600 - 151200 s	74	526
1	1	First stage	1	WT4	21/08/2013	600	151200 - 151800 s	71.9	528.1
1	1	First stage	1	WT4	21/08/2013	600	151800 - 152400 s	242.1	357.9
1	1	First stage	1	WT4	21/08/2013	600	152400 - 153000 s	384.4	215.6
1	1	First stage	1	WT4	21/08/2013	600	153000 - 153600 s	553.6	46.5
1	1	First stage	1	WT4	21/08/2013	600	153600 - 154200 s	549.7	50.3
1	1	First stage	1	WT4	21/08/2013	600	154200 - 154800 s	549.6	50.4
1	1	First stage	1	WT4	21/08/2013	600	154800 - 155400 s	85.5	514.5
1	1	First stage	1	WT4	21/08/2013	600	155400 - 156000 s	179.6	420.4
1	1	First stage	1	WT4	21/08/2013	600	156000 - 156600 s	91.3	508.7
1	1	First stage	1	WT4	21/08/2013	600	156600 - 157200 s	77.5	522.6
1	1	First stage	1	WT4	21/08/2013	600	157200 - 157800 s	109.3	490.7
1	1	First stage	1	WT4	21/08/2013	600	157800 - 158400 s	188	412
1	1	First stage	1	WT4	21/08/2013	600	158400 - 159000 s	15.6	584.4
1	1	First stage	1	WT4	21/08/2013	600	159000 - 159600 s	97.7	502.3
1	1	First stage	1	WT4	21/08/2013	600	159600 - 160200 s	96.9	503.1
1	1	First stage	1	WT4	21/08/2013	600	160200 - 160800 s	429.6	170.5
1	1	First stage	1	WT4	21/08/2013	600	160800 - 161400 s	600	0
1	1	First stage	1	WT4	21/08/2013	600	161400 - 162000 s	147.4	452.6
1	1	First stage	1	WT4	21/08/2013	600	162000 - 162600 s	59.6	540.4
1	1	First stage	1	WT4	21/08/2013	600	162600 - 163200 s	23.3	576.7
1	1	First stage	1	WT4	21/08/2013	600	163200 - 163800 s	53.1	546.9
1	1	First stage	1	WT4	21/08/2013	600	163800 - 164400 s	36.2	563.8
1	1	First stage	1	WT4	21/08/2013	600	164400 - 165000 s	56.7	543.3
1	1	First stage	1	WT4	21/08/2013	600	165000 - 165600 s	34.1	565.9
1	1	First stage	1	WT4	21/08/2013	600	165600 - 166200 s	583.8	16.3
1	1	First stage	1	WT4	21/08/2013	600	166200 - 166800 s	600	0
1	1	First stage	1	WT4	21/08/2013	600	166800 - 167400 s	290.3	309.7
1	1	First stage	1	WT4	21/08/2013	600	167400 - 168000 s	105.1	494.9
1	1	First stage	1	WT4	21/08/2013	600	168000 - 168600 s	70.8	529.2
1	1	First stage	1	WT4	21/08/2013	600	168600 - 169200 s	138.5	461.5
1	1	First stage	1	WT4	21/08/2013	600	169200 - 169800 s	600	0
1	1	First stage	1	WT4	21/08/2013	600	169800 - 170400 s	600	0
1	1	First stage	1	WT4	21/08/2013	600	170400 - 171000 s	433.8	166.2
1	1	First stage	1	WT4	21/08/2013	600	171000 - 171600 s	38.1	561.9
1	1	First stage	1	WT4	21/08/2013	600	171600 - 172200 s	184	416
1	1	First stage	1	WT4	21/08/2013	600	172200 - 172800 s	66.6	533.4
1	1	First stage	1	WT4	21/08/2013	600	172800 - 173400 s	117	483
1	1	First stage	1	WT4	21/08/2013	600	173400 - 174000 s	457	143
1	1	First stage	1	WT4	21/08/2013	600	174000 - 174600 s	600	0
1	1	First stage	1	WT4	21/08/2013	600	174600 - 175200 s	600	0
1	1	First stage	1	WT4	21/08/2013	600	175200 - 175800 s	600	0
1	1	First stage	1	WT4	21/08/2013	600	175800 - 176400 s	600	0
1	1	First stage	1	WT4	21/08/2013	600	176400 - 177000 s	600	0
1	1	First stage	1	WT4	21/08/2013	600	177000 - 177600 s	600	0
1	1	First stage	1	WT4	21/08/2013	600	177600 - 178200 s	600	0
1	1	First stage	1	WT4	21/08/2013	600	178200 - 178800 s	600	0
1	1	First stage	1	WT4	21/08/2013	600	178800 - 179400 s	600	0
1	1	First stage	1	WT4	21/08/2013	600	179400 - 180000 s	600	0
1	1	First stage	1	WT4	21/08/2013	600	180000 - 180600 s	430.9	169.1
1	1	First stage	1	WT4	21/08/2013	600	180600 - 181200 s	600	0
1	1	First stage	1	WT4	21/08/2013	600	181200 - 181800 s	600	0
1	1	First stage	1	WT4	21/08/2013	600	181800 - 182400 s	600	0
1	1	First stage	1	WT4	21/08/2013	600	182400 - 183000 s	600	0
1	1	First stage	1	WT4	21/08/2013	600	183000 - 183600 s	600	0
1	1	First stage	1	WT4	21/08/2013	600	183600 - 184200 s	484.1	115.9
1	1	First stage	1	WT4	21/08/2013	600	184200 - 184800 s	57	543
1	1	First stage	1	WT4	21/08/2013	600	184800 - 185400 s	398.5	201.5
1	1	First stage	1	WT4	21/08/2013	600	185400 - 186000 s	577.1	22.9
1	1	First stage	1	WT4	21/08/2013	600	186000 - 186600 s	172.6	427.4
1	1	First stage	1	WT4	21/08/2013	600	186600 - 187200 s	469.1	130.9
1	1	First stage	1	WT4	21/08/2013	600	187200 - 187800 s	486.8	113.3
1	1	First stage	1	WT4	21/08/2013	600	187800 - 188400 s	172.4	427.6
1	1	First stage	1	WT4	21/08/2013	600	188400 - 189000 s	369	231
1	1	First stage	1	WT4	21/08/2013	600	189000 - 189600 s	469.7	130.3
1	1	First stage	1	WT4	21/08/2013	600	189600 - 190200 s	600	0
1	1	First stage	1	WT4	21/08/2013	600	190200 - 190800 s	600	0
1	1	First stage	1	WT4	21/08/2013	600	190800 - 191400 s	600	0
1	1	First stage	1	WT4	21/08/2013	600	191400 - 192000 s	600	0
1	1	First stage	1	WT4	21/08/2013	600	192000 - 192600 s	600	0
1	1	First stage	1	WT4	21/08/2013	600	192600 - 193200 s	600	0
1	1	First stage	1	WT4	21/08/2013	600	193200 - 193800 s	600	0
1	1	First stage	1	WT4	21/08/2013	600	193800 - 194400 s	351.8	248.3
1	1	First stage	1	WT4	21/08/2013	600	194400 - 195000 s	311.6	288.4
1	1	First stage	1	WT4	21/08/2013	600	195000 - 195600 s	37.6	562.4
1	1	First stage	1	WT4	21/08/2013	600	195600 - 196200 s	165.5	434.5
1	1	First stage	1	WT4	21/08/2013	600	196200 - 196800 s	250.7	349.3
1	1	First stage	1	WT4	21/08/2013	600	196800 - 197400 s	397.3	202.8
1	1	First stage	1	WT4	21/08/2013	600	197400 - 198000 s	38	562
1	1	First stage	1	WT4	21/08/2013	600	198000 - 198600 s	242	358.1
1	1	First stage	1	WT4	21/08/2013	600	198600 - 199200 s	503.8	96.2
1	1	First stage	1	WT4	21/08/2013	600	199200 - 199800 s	600	0
1	1	First stage	1	WT4	21/08/2013	600	199800 - 200400 s	558.4	41.6
1	1	First stage	1	WT4	21/08/2013	600	200400 - 201000 s	600	0
1	1	First stage	1	WT4	21/08/2013	600	201000 - 201600 s	600	0
1	1	First stage	1	WT4	21/08/2013	600	201600 - 202200 s	531.2	68.8
1	1	First stage	1	WT4	21/08/2013	600	202200 - 202800 s	172.2	427.8
1	1	First stage	1	WT4	21/08/2013	600	202800 - 203400 s	165.3	434.7
1	1	First stage	1	WT4	21/08/2013	600	203400 - 204000 s	199.9	400.1
1	1	First stage	1	WT4	21/08/2013	600	204000 - 204600 s	93	507
1	1	First stage	1	WT4	21/08/2013	600	204600 - 205200 s	120	480
1	1	First stage	1	WT4	21/08/2013	600	205200 - 205800 s	38	562
1	1	First stage	1	WT4	21/08/2013	600	205800 - 206400 s	200.3	399.7
1	1	First stage	1	WT4	21/08/2013	600	206400 - 207000 s	431.8	168.2
1	1	First stage	1	WT4	21/08/2013	600	207000 - 207600 s	600	0
1	1	First stage	1	WT4	21/08/2013	600	207600 - 208200 s	562.2	37.8
1	1	First stage	1	WT4	21/08/2013	600	208200 - 208800 s	558.1	41.9
1	1	First stage	1	WT4	21/08/2013	600	208800 - 209400 s	128.4	471.6
1	1	First stage	1	WT4	21/08/2013	600	209400 - 210000 s	190.5	409.5
1	1	First stage	1	WT4	21/08/2013	600	210000 - 210600 s	177.8	422.2
1	1	First stage	1	WT4	21/08/2013	600	210600 - 211200 s	38.7	561.3
1	1	First stage	1	WT4	21/08/2013	600	211200 - 211800 s	123.8	476.2
1	1	First stage	1	WT4	21/08/2013	600	211800 - 212400 s	164.9	435.1
1	1	First stage	1	WT4	21/08/2013	600	212400 - 213000 s	66.9	533.1
1	1	First stage	1	WT4	21/08/2013	600	213000 - 213600 s	554.9	45.1
1	1	First stage	1	WT4	21/08/2013	600	213600 - 214200 s	478.4	121.6
1	1	First stage	1	WT4	21/08/2013	600	214200 - 214800 s	386	214
1	1	First stage	1	WT4	21/08/2013	600	214800 - 215400 s	385.1	214.9
1	1	First stage	1	WT4	21/08/2013	600	215400 - 216000 s	293.8	306.2
2	2	First stage	1	WT3	21/08/2013	600	0 - 600 secs.	600	0
2	2	First stage	1	WT3	21/08/2013	600	600 - 1200 secs.	538.1	61.9
2	2	First stage	1	WT3	21/08/2013	600	1200 - 1800 secs.	549.1	50.9
2	2	First stage	1	WT3	21/08/2013	600	1800 - 2400 secs.	312	288.1
2	2	First stage	1	WT3	21/08/2013	600	2400 - 3000 secs.	475.5	124.5
2	2	First stage	1	WT3	21/08/2013	600	3000 - 3600 secs.	600	0
2	2	First stage	1	WT3	21/08/2013	600	3600 - 4200 secs.	600	0
2	2	First stage	1	WT3	21/08/2013	600	4200 - 4800 secs.	600	0
2	2	First stage	1	WT3	21/08/2013	600	4800 - 5400 secs.	557.8	42.2
2	2	First stage	1	WT3	21/08/2013	600	5400 - 6000 secs.	600	0
2	2	First stage	1	WT3	21/08/2013	600	6000 - 6600 secs.	600	0
2	2	First stage	1	WT3	21/08/2013	600	6600 - 7200 secs.	600	0
2	2	First stage	1	WT3	21/08/2013	600	7200 - 7800 secs.	600	0
2	2	First stage	1	WT3	21/08/2013	600	7800 - 8400 secs.	600	0
2	2	First stage	1	WT3	21/08/2013	600	8400 - 9000 secs.	600	0
2	2	First stage	1	WT3	21/08/2013	600	9000 - 9600 secs.	600	0
2	2	First stage	1	WT3	21/08/2013	600	9600 - 10200 secs	600	0
2	2	First stage	1	WT3	21/08/2013	600	10200 - 10800 sec	600	0
2	2	First stage	1	WT3	21/08/2013	600	10800 - 11400 sec	600	0
2	2	First stage	1	WT3	21/08/2013	600	11400 - 12000 sec	600	0
2	2	First stage	1	WT3	21/08/2013	600	12000 - 12600 sec	600	0
2	2	First stage	1	WT3	21/08/2013	600	12600 - 13200 sec	600	0
2	2	First stage	1	WT3	21/08/2013	600	13200 - 13800 sec	600	0
2	2	First stage	1	WT3	21/08/2013	600	13800 - 14400 sec	600	0
2	2	First stage	1	WT3	21/08/2013	600	14400 - 15000 sec	600	0
2	2	First stage	1	WT3	21/08/2013	600	15000 - 15600 sec	401.6	198.4
2	2	First stage	1	WT3	21/08/2013	600	15600 - 16200 sec	325.4	274.6
2	2	First stage	1	WT3	21/08/2013	600	16200 - 16800 sec	113.4	486.6
2	2	First stage	1	WT3	21/08/2013	600	16800 - 17400 sec	178.7	421.3
2	2	First stage	1	WT3	21/08/2013	600	17400 - 18000 sec	430.4	169.6
2	2	First stage	1	WT3	21/08/2013	600	18000 - 18600 sec	600	0
2	2	First stage	1	WT3	21/08/2013	600	18600 - 19200 sec	600	0
2	2	First stage	1	WT3	21/08/2013	600	19200 - 19800 sec	600	0
2	2	First stage	1	WT3	21/08/2013	600	19800 - 20400 sec	600	0
2	2	First stage	1	WT3	21/08/2013	600	20400 - 21000 sec	541.4	58.6
2	2	First stage	1	WT3	21/08/2013	600	21000 - 21600 sec	600	0
2	2	First stage	1	WT3	21/08/2013	600	21600 - 22200 sec	600	0
2	2	First stage	1	WT3	21/08/2013	600	22200 - 22800 sec	600	0
2	2	First stage	1	WT3	21/08/2013	600	22800 - 23400 sec	600	0
2	2	First stage	1	WT3	21/08/2013	600	23400 - 24000 sec	600	0
2	2	First stage	1	WT3	21/08/2013	600	24000 - 24600 sec	540	60
2	2	First stage	1	WT3	21/08/2013	600	24600 - 25200 sec	544	56
2	2	First stage	1	WT3	21/08/2013	600	25200 - 25800 sec	213.8	386.2
2	2	First stage	1	WT3	21/08/2013	600	25800 - 26400 sec	134.8	465.3
2	2	First stage	1	WT3	21/08/2013	600	26400 - 27000 sec	122.4	477.6
2	2	First stage	1	WT3	21/08/2013	600	27000 - 27600 sec	114	486
2	2	First stage	1	WT3	21/08/2013	600	27600 - 28200 sec	43.5	556.5
2	2	First stage	1	WT3	21/08/2013	600	28200 - 28800 sec	410.8	189.2
2	2	First stage	1	WT3	21/08/2013	600	28800 - 29400 sec	521	79
2	2	First stage	1	WT3	21/08/2013	600	29400 - 30000 sec	538.3	61.7
2	2	First stage	1	WT3	21/08/2013	600	30000 - 30600 sec	515.2	84.8
2	2	First stage	1	WT3	21/08/2013	600	30600 - 31200 sec	600	0
2	2	First stage	1	WT3	21/08/2013	600	31200 - 31800 sec	153.7	446.3
2	2	First stage	1	WT3	21/08/2013	600	31800 - 32400 sec	226	374
2	2	First stage	1	WT3	21/08/2013	600	32400 - 33000 sec	56.2	543.9
2	2	First stage	1	WT3	21/08/2013	600	33000 - 33600 sec	174.6	425.4
2	2	First stage	1	WT3	21/08/2013	600	33600 - 34200 sec	125.2	474.8
2	2	First stage	1	WT3	21/08/2013	600	34200 - 34800 sec	326.6	273.4
2	2	First stage	1	WT3	21/08/2013	600	34800 - 35400 sec	183.3	416.7
2	2	First stage	1	WT3	21/08/2013	600	35400 - 36000 sec	213.6	386.4
2	2	First stage	1	WT3	21/08/2013	600	36000 - 36600 sec	379.6	220.4
2	2	First stage	1	WT3	21/08/2013	600	36600 - 37200 sec	213.1	386.9
2	2	First stage	1	WT3	21/08/2013	600	37200 - 37800 sec	246.1	353.9
2	2	First stage	1	WT3	21/08/2013	600	37800 - 38400 sec	269	331
2	2	First stage	1	WT3	21/08/2013	600	38400 - 39000 sec	164.9	435.1
2	2	First stage	1	WT3	21/08/2013	600	39000 - 39600 sec	309.3	290.7
2	2	First stage	1	WT3	21/08/2013	600	39600 - 40200 sec	600	0
2	2	First stage	1	WT3	21/08/2013	600	40200 - 40800 sec	600	0
2	2	First stage	1	WT3	21/08/2013	600	40800 - 41400 sec	600	0
2	2	First stage	1	WT3	21/08/2013	600	41400 - 42000 sec	600	0
2	2	First stage	1	WT3	21/08/2013	600	42000 - 42600 sec	600	0
2	2	First stage	1	WT3	21/08/2013	600	42600 - 43200 sec	600	0
2	2	First stage	1	WT3	21/08/2013	600	43200 - 43800 sec	600	0
2	2	First stage	1	WT3	21/08/2013	600	43800 - 44400 sec	600	0
2	2	First stage	1	WT3	21/08/2013	600	44400 - 45000 sec	279.2	320.8
2	2	First stage	1	WT3	21/08/2013	600	45000 - 45600 sec	181.2	418.8
2	2	First stage	1	WT3	21/08/2013	600	45600 - 46200 sec	44.8	555.2
2	2	First stage	1	WT3	21/08/2013	600	46200 - 46800 sec	127.6	472.4
2	2	First stage	1	WT3	21/08/2013	600	46800 - 47400 sec	109.5	490.5
2	2	First stage	1	WT3	21/08/2013	600	47400 - 48000 sec	32.5	567.5
2	2	First stage	1	WT3	21/08/2013	600	48000 - 48600 sec	54.2	545.8
2	2	First stage	1	WT3	21/08/2013	600	48600 - 49200 sec	534	66
2	2	First stage	1	WT3	21/08/2013	600	49200 - 49800 sec	600	0
2	2	First stage	1	WT3	21/08/2013	600	49800 - 50400 sec	391.5	208.5
2	2	First stage	1	WT3	21/08/2013	600	50400 - 51000 sec	93.1	506.9
2	2	First stage	1	WT3	21/08/2013	600	51000 - 51600 sec	111.4	488.6
2	2	First stage	1	WT3	21/08/2013	600	51600 - 52200 sec	61.5	538.5
2	2	First stage	1	WT3	21/08/2013	600	52200 - 52800 sec	84.8	515.2
2	2	First stage	1	WT3	21/08/2013	600	52800 - 53400 sec	34.2	565.8
2	2	First stage	1	WT3	21/08/2013	600	53400 - 54000 sec	50	550
2	2	First stage	1	WT3	21/08/2013	600	54000 - 54600 sec	141.1	458.9
2	2	First stage	1	WT3	21/08/2013	600	54600 - 55200 sec	52	548
2	2	First stage	1	WT3	21/08/2013	600	55200 - 55800 sec	105.4	494.6
2	2	First stage	1	WT3	21/08/2013	600	55800 - 56400 sec	119.6	480.4
2	2	First stage	1	WT3	21/08/2013	600	56400 - 57000 sec	94.8	505.2
2	2	First stage	1	WT3	21/08/2013	600	57000 - 57600 sec	587.1	12.9
2	2	First stage	1	WT3	21/08/2013	600	57600 - 58200 sec	600	0
2	2	First stage	1	WT3	21/08/2013	600	58200 - 58800 sec	600	0
2	2	First stage	1	WT3	21/08/2013	600	58800 - 59400 sec	295.9	304.1
2	2	First stage	1	WT3	21/08/2013	600	59400 - 60000 sec	104.4	495.6
2	2	First stage	1	WT3	21/08/2013	600	60000 - 60600 sec	44.7	555.3
2	2	First stage	1	WT3	21/08/2013	600	60600 - 61200 sec	107.3	492.7
2	2	First stage	1	WT3	21/08/2013	600	61200 - 61800 sec	9.4	590.6
2	2	First stage	1	WT3	21/08/2013	600	61800 - 62400 sec	38.1	561.9
2	2	First stage	1	WT3	21/08/2013	600	62400 - 63000 sec	45.2	554.8
2	2	First stage	1	WT3	21/08/2013	600	63000 - 63600 sec	170.9	429.1
2	2	First stage	1	WT3	21/08/2013	600	63600 - 64200 sec	50.6	549.4
2	2	First stage	1	WT3	21/08/2013	600	64200 - 64800 sec	152.2	447.8
2	2	First stage	1	WT3	21/08/2013	600	64800 - 65400 sec	27.6	572.4
2	2	First stage	1	WT3	21/08/2013	600	65400 - 66000 sec	26.5	573.5
2	2	First stage	1	WT3	21/08/2013	600	66000 - 66600 sec	46.8	553.2
2	2	First stage	1	WT3	21/08/2013	600	66600 - 67200 sec	465.4	134.6
2	2	First stage	1	WT3	21/08/2013	600	67200 - 67800 sec	289.3	310.7
2	2	First stage	1	WT3	21/08/2013	600	67800 - 68400 sec	98.2	501.8
2	2	First stage	1	WT3	21/08/2013	600	68400 - 69000 sec	6.2	593.8
2	2	First stage	1	WT3	21/08/2013	600	69000 - 69600 sec	25.6	574.4
2	2	First stage	1	WT3	21/08/2013	600	69600 - 70200 sec	164.2	435.8
2	2	First stage	1	WT3	21/08/2013	600	70200 - 70800 sec	127.8	472.2
2	2	First stage	1	WT3	21/08/2013	600	70800 - 71400 sec	101.8	498.2
2	2	First stage	1	WT3	21/08/2013	600	71400 - 72000 sec	227.4	372.6
2	2	First stage	1	WT3	21/08/2013	600	72000 - 72600 sec	197.4	402.6
2	2	First stage	1	WT3	21/08/2013	600	72600 - 73200 sec	384.9	215.1
2	2	First stage	1	WT3	21/08/2013	600	73200 - 73800 sec	600	0
2	2	First stage	1	WT3	21/08/2013	600	73800 - 74400 sec	557.9	42.1
2	2	First stage	1	WT3	21/08/2013	600	74400 - 75000 sec	376.1	223.9
2	2	First stage	1	WT3	21/08/2013	600	75000 - 75600 sec	248.1	351.9
2	2	First stage	1	WT3	21/08/2013	600	75600 - 76200 sec	28.8	571.2
2	2	First stage	1	WT3	21/08/2013	600	76200 - 76800 sec	126.7	473.4
2	2	First stage	1	WT3	21/08/2013	600	76800 - 77400 sec	121.9	478.1
2	2	First stage	1	WT3	21/08/2013	600	77400 - 78000 sec	50.5	549.5
2	2	First stage	1	WT3	21/08/2013	600	78000 - 78600 sec	240.5	359.5
2	2	First stage	1	WT3	21/08/2013	600	78600 - 79200 sec	490.9	109.1
2	2	First stage	1	WT3	21/08/2013	600	79200 - 79800 sec	600	0
2	2	First stage	1	WT3	21/08/2013	600	79800 - 80400 sec	347.2	252.8
2	2	First stage	1	WT3	21/08/2013	600	80400 - 81000 sec	50.7	549.3
2	2	First stage	1	WT3	21/08/2013	600	81000 - 81600 sec	94.6	505.4
2	2	First stage	1	WT3	21/08/2013	600	81600 - 82200 sec	3.6	596.4
2	2	First stage	1	WT3	21/08/2013	600	82200 - 82800 sec	239.4	360.6
2	2	First stage	1	WT3	21/08/2013	600	82800 - 83400 sec	320.8	279.2
2	2	First stage	1	WT3	21/08/2013	600	83400 - 84000 sec	600	0
2	2	First stage	1	WT3	21/08/2013	600	84000 - 84600 sec	229	371
2	2	First stage	1	WT3	21/08/2013	600	84600 - 85200 sec	78.2	521.8
2	2	First stage	1	WT3	21/08/2013	600	85200 - 85800 sec	439	161
2	2	First stage	1	WT3	21/08/2013	600	85800 - 86400 sec	600	0
2	2	First stage	1	WT3	21/08/2013	600	86400 - 87000 sec	600	0
2	2	First stage	1	WT3	21/08/2013	600	87000 - 87600 sec	478.3	121.7
2	2	First stage	1	WT3	21/08/2013	600	87600 - 88200 sec	467.3	132.7
2	2	First stage	1	WT3	21/08/2013	600	88200 - 88800 sec	600	0
2	2	First stage	1	WT3	21/08/2013	600	88800 - 89400 sec	600	0
2	2	First stage	1	WT3	21/08/2013	600	89400 - 90000 sec	600	0
2	2	First stage	1	WT3	21/08/2013	600	90000 - 90600 sec	600	0
2	2	First stage	1	WT3	21/08/2013	600	90600 - 91200 sec	600	0
2	2	First stage	1	WT3	21/08/2013	600	91200 - 91800 sec	550.7	49.3
2	2	First stage	1	WT3	21/08/2013	600	91800 - 92400 sec	600	0
2	2	First stage	1	WT3	21/08/2013	600	92400 - 93000 sec	600	0
2	2	First stage	1	WT3	21/08/2013	600	93000 - 93600 sec	600	0
2	2	First stage	1	WT3	21/08/2013	600	93600 - 94200 sec	309.8	290.2
2	2	First stage	1	WT3	21/08/2013	600	94200 - 94800 sec	196	404
2	2	First stage	1	WT3	21/08/2013	600	94800 - 95400 sec	85.5	514.5
2	2	First stage	1	WT3	21/08/2013	600	95400 - 96000 sec	102.7	497.3
2	2	First stage	1	WT3	21/08/2013	600	96000 - 96600 sec	346.7	253.3
2	2	First stage	1	WT3	21/08/2013	600	96600 - 97200 sec	423.1	176.9
2	2	First stage	1	WT3	21/08/2013	600	97200 - 97800 sec	600	0
2	2	First stage	1	WT3	21/08/2013	600	97800 - 98400 sec	600	0
2	2	First stage	1	WT3	21/08/2013	600	98400 - 99000 sec	496.7	103.3
2	2	First stage	1	WT3	21/08/2013	600	99000 - 99600 sec	456	144
2	2	First stage	1	WT3	21/08/2013	600	99600 - 100200 se	600	0
2	2	First stage	1	WT3	21/08/2013	600	100200 - 100800 s	600	0
2	2	First stage	1	WT3	21/08/2013	600	100800 - 101400 s	600	0
2	2	First stage	1	WT3	21/08/2013	600	101400 - 102000 s	468.4	131.7
2	2	First stage	1	WT3	21/08/2013	600	102000 - 102600 s	283.9	316.1
2	2	First stage	1	WT3	21/08/2013	600	102600 - 103200 s	154.7	445.3
2	2	First stage	1	WT3	21/08/2013	600	103200 - 103800 s	192.9	407.1
2	2	First stage	1	WT3	21/08/2013	600	103800 - 104400 s	460.9	139.1
2	2	First stage	1	WT3	21/08/2013	600	104400 - 105000 s	600	0
2	2	First stage	1	WT3	21/08/2013	600	105000 - 105600 s	600	0
2	2	First stage	1	WT3	21/08/2013	600	105600 - 106200 s	600	0
2	2	First stage	1	WT3	21/08/2013	600	106200 - 106800 s	600	0
2	2	First stage	1	WT3	21/08/2013	600	106800 - 107400 s	600	0
2	2	First stage	1	WT3	21/08/2013	600	107400 - 108000 s	553.5	46.5
2	2	First stage	1	WT3	21/08/2013	600	108000 - 108600 s	600	0
2	2	First stage	1	WT3	21/08/2013	600	108600 - 109200 s	458.3	141.7
2	2	First stage	1	WT3	21/08/2013	600	109200 - 109800 s	142.8	457.3
2	2	First stage	1	WT3	21/08/2013	600	109800 - 110400 s	72.2	527.8
2	2	First stage	1	WT3	21/08/2013	600	110400 - 111000 s	74.6	525.4
2	2	First stage	1	WT3	21/08/2013	600	111000 - 111600 s	141	459
2	2	First stage	1	WT3	21/08/2013	600	111600 - 112200 s	114.6	485.4
2	2	First stage	1	WT3	21/08/2013	600	112200 - 112800 s	481.2	118.8
2	2	First stage	1	WT3	21/08/2013	600	112800 - 113400 s	600	0
2	2	First stage	1	WT3	21/08/2013	600	113400 - 114000 s	600	0
2	2	First stage	1	WT3	21/08/2013	600	114000 - 114600 s	375.6	224.4
2	2	First stage	1	WT3	21/08/2013	600	114600 - 115200 s	258.8	341.3
2	2	First stage	1	WT3	21/08/2013	600	115200 - 115800 s	427.5	172.5
2	2	First stage	1	WT3	21/08/2013	600	115800 - 116400 s	182	418
2	2	First stage	1	WT3	21/08/2013	600	116400 - 117000 s	244	356
2	2	First stage	1	WT3	21/08/2013	600	117000 - 117600 s	600	0
2	2	First stage	1	WT3	21/08/2013	600	117600 - 118200 s	558.4	41.6
2	2	First stage	1	WT3	21/08/2013	600	118200 - 118800 s	600	0
2	2	First stage	1	WT3	21/08/2013	600	118800 - 119400 s	600	0
2	2	First stage	1	WT3	21/08/2013	600	119400 - 120000 s	600	0
2	2	First stage	1	WT3	21/08/2013	600	120000 - 120600 s	600	0
2	2	First stage	1	WT3	21/08/2013	600	120600 - 121200 s	600	0
2	2	First stage	1	WT3	21/08/2013	600	121200 - 121800 s	518.7	81.3
2	2	First stage	1	WT3	21/08/2013	600	121800 - 122400 s	127.6	472.4
2	2	First stage	1	WT3	21/08/2013	600	122400 - 123000 s	134.8	465.2
2	2	First stage	1	WT3	21/08/2013	600	123000 - 123600 s	202.2	397.8
2	2	First stage	1	WT3	21/08/2013	600	123600 - 124200 s	104.3	495.7
2	2	First stage	1	WT3	21/08/2013	600	124200 - 124800 s	50.4	549.6
2	2	First stage	1	WT3	21/08/2013	600	124800 - 125400 s	237.6	362.4
2	2	First stage	1	WT3	21/08/2013	600	125400 - 126000 s	74.2	525.8
2	2	First stage	1	WT3	21/08/2013	600	126000 - 126600 s	138.2	461.8
2	2	First stage	1	WT3	21/08/2013	600	126600 - 127200 s	81.7	518.3
2	2	First stage	1	WT3	21/08/2013	600	127200 - 127800 s	220	380
2	2	First stage	1	WT3	21/08/2013	600	127800 - 128400 s	600	0
2	2	First stage	1	WT3	21/08/2013	600	128400 - 129000 s	600	0
2	2	First stage	1	WT3	21/08/2013	600	129000 - 129600 s	600	0
2	2	First stage	1	WT3	21/08/2013	600	129600 - 130200 s	542.3	57.7
2	2	First stage	1	WT3	21/08/2013	600	130200 - 130800 s	600	0
2	2	First stage	1	WT3	21/08/2013	600	130800 - 131400 s	288.1	311.9
2	2	First stage	1	WT3	21/08/2013	600	131400 - 132000 s	130	470
2	2	First stage	1	WT3	21/08/2013	600	132000 - 132600 s	293.2	306.8
2	2	First stage	1	WT3	21/08/2013	600	132600 - 133200 s	285.4	314.6
2	2	First stage	1	WT3	21/08/2013	600	133200 - 133800 s	63.5	536.5
2	2	First stage	1	WT3	21/08/2013	600	133800 - 134400 s	80.7	519.3
2	2	First stage	1	WT3	21/08/2013	600	134400 - 135000 s	84.5	515.5
2	2	First stage	1	WT3	21/08/2013	600	135000 - 135600 s	161.4	438.6
2	2	First stage	1	WT3	21/08/2013	600	135600 - 136200 s	115.4	484.6
2	2	First stage	1	WT3	21/08/2013	600	136200 - 136800 s	141.4	458.6
2	2	First stage	1	WT3	21/08/2013	600	136800 - 137400 s	545.7	54.3
2	2	First stage	1	WT3	21/08/2013	600	137400 - 138000 s	586.2	13.8
2	2	First stage	1	WT3	21/08/2013	600	138000 - 138600 s	428.1	171.9
2	2	First stage	1	WT3	21/08/2013	600	138600 - 139200 s	72	528
2	2	First stage	1	WT3	21/08/2013	600	139200 - 139800 s	44.2	555.8
2	2	First stage	1	WT3	21/08/2013	600	139800 - 140400 s	156.1	443.9
2	2	First stage	1	WT3	21/08/2013	600	140400 - 141000 s	128	472
2	2	First stage	1	WT3	21/08/2013	600	141000 - 141600 s	54	546.1
2	2	First stage	1	WT3	21/08/2013	600	141600 - 142200 s	52.4	547.6
2	2	First stage	1	WT3	21/08/2013	600	142200 - 142800 s	136.2	463.8
2	2	First stage	1	WT3	21/08/2013	600	142800 - 143400 s	76.5	523.5
2	2	First stage	1	WT3	21/08/2013	600	143400 - 144000 s	184.8	415.2
2	2	First stage	1	WT3	21/08/2013	600	144000 - 144600 s	180	420
2	2	First stage	1	WT3	21/08/2013	600	144600 - 145200 s	82.5	517.5
2	2	First stage	1	WT3	21/08/2013	600	145200 - 145800 s	269.8	330.2
2	2	First stage	1	WT3	21/08/2013	600	145800 - 146400 s	102.4	497.6
2	2	First stage	1	WT3	21/08/2013	600	146400 - 147000 s	162.3	437.7
2	2	First stage	1	WT3	21/08/2013	600	147000 - 147600 s	553.3	46.7
2	2	First stage	1	WT3	21/08/2013	600	147600 - 148200 s	545.9	54.1
2	2	First stage	1	WT3	21/08/2013	600	148200 - 148800 s	600	0
2	2	First stage	1	WT3	21/08/2013	600	148800 - 149400 s	544.4	55.6
2	2	First stage	1	WT3	21/08/2013	600	149400 - 150000 s	600	0
2	2	First stage	1	WT3	21/08/2013	600	150000 - 150600 s	192.4	407.6
2	2	First stage	1	WT3	21/08/2013	600	150600 - 151200 s	123.5	476.5
2	2	First stage	1	WT3	21/08/2013	600	151200 - 151800 s	69.4	530.6
2	2	First stage	1	WT3	21/08/2013	600	151800 - 152400 s	12.1	587.9
2	2	First stage	1	WT3	21/08/2013	600	152400 - 153000 s	49.9	550.1
2	2	First stage	1	WT3	21/08/2013	600	153000 - 153600 s	180	420.1
2	2	First stage	1	WT3	21/08/2013	600	153600 - 154200 s	75.8	524.2
2	2	First stage	1	WT3	21/08/2013	600	154200 - 154800 s	33.3	566.7
2	2	First stage	1	WT3	21/08/2013	600	154800 - 155400 s	0	600
2	2	First stage	1	WT3	21/08/2013	600	155400 - 156000 s	12.5	587.5
2	2	First stage	1	WT3	21/08/2013	600	156000 - 156600 s	146.9	453.1
2	2	First stage	1	WT3	21/08/2013	600	156600 - 157200 s	321.8	278.2
2	2	First stage	1	WT3	21/08/2013	600	157200 - 157800 s	521.9	78.1
2	2	First stage	1	WT3	21/08/2013	600	157800 - 158400 s	62.4	537.6
2	2	First stage	1	WT3	21/08/2013	600	158400 - 159000 s	31.7	568.3
2	2	First stage	1	WT3	21/08/2013	600	159000 - 159600 s	256.2	343.8
2	2	First stage	1	WT3	21/08/2013	600	159600 - 160200 s	69.6	530.4
2	2	First stage	1	WT3	21/08/2013	600	160200 - 160800 s	17.7	582.3
2	2	First stage	1	WT3	21/08/2013	600	160800 - 161400 s	60.8	539.2
2	2	First stage	1	WT3	21/08/2013	600	161400 - 162000 s	59.3	540.7
2	2	First stage	1	WT3	21/08/2013	600	162000 - 162600 s	57.2	542.8
2	2	First stage	1	WT3	21/08/2013	600	162600 - 163200 s	339.7	260.3
2	2	First stage	1	WT3	21/08/2013	600	163200 - 163800 s	600	0
2	2	First stage	1	WT3	21/08/2013	600	163800 - 164400 s	446.9	153.1
2	2	First stage	1	WT3	21/08/2013	600	164400 - 165000 s	275.9	324.1
2	2	First stage	1	WT3	21/08/2013	600	165000 - 165600 s	223.6	376.4
2	2	First stage	1	WT3	21/08/2013	600	165600 - 166200 s	28.8	571.2
2	2	First stage	1	WT3	21/08/2013	600	166200 - 166800 s	112.1	487.9
2	2	First stage	1	WT3	21/08/2013	600	166800 - 167400 s	309.9	290.1
2	2	First stage	1	WT3	21/08/2013	600	167400 - 168000 s	325.2	274.8
2	2	First stage	1	WT3	21/08/2013	600	168000 - 168600 s	43.9	556.1
2	2	First stage	1	WT3	21/08/2013	600	168600 - 169200 s	142.4	457.6
2	2	First stage	1	WT3	21/08/2013	600	169200 - 169800 s	412.9	187.1
2	2	First stage	1	WT3	21/08/2013	600	169800 - 170400 s	528.9	71.1
2	2	First stage	1	WT3	21/08/2013	600	170400 - 171000 s	556.5	43.5
2	2	First stage	1	WT3	21/08/2013	600	171000 - 171600 s	58	542
2	2	First stage	1	WT3	21/08/2013	600	171600 - 172200 s	107.5	492.5
2	2	First stage	1	WT3	21/08/2013	600	172200 - 172800 s	100.9	499.1
2	2	First stage	1	WT3	21/08/2013	600	172800 - 173400 s	481.1	118.9
2	2	First stage	1	WT3	21/08/2013	600	173400 - 174000 s	551	49
2	2	First stage	1	WT3	21/08/2013	600	174000 - 174600 s	355.2	244.8
2	2	First stage	1	WT3	21/08/2013	600	174600 - 175200 s	250.4	349.7
2	2	First stage	1	WT3	21/08/2013	600	175200 - 175800 s	600	0
2	2	First stage	1	WT3	21/08/2013	600	175800 - 176400 s	600	0
2	2	First stage	1	WT3	21/08/2013	600	176400 - 177000 s	600	0
2	2	First stage	1	WT3	21/08/2013	600	177000 - 177600 s	600	0
2	2	First stage	1	WT3	21/08/2013	600	177600 - 178200 s	600	0
2	2	First stage	1	WT3	21/08/2013	600	178200 - 178800 s	265.5	334.5
2	2	First stage	1	WT3	21/08/2013	600	178800 - 179400 s	317.6	282.4
2	2	First stage	1	WT3	21/08/2013	600	179400 - 180000 s	600	0
2	2	First stage	1	WT3	21/08/2013	600	180000 - 180600 s	600	0
2	2	First stage	1	WT3	21/08/2013	600	180600 - 181200 s	600	0
2	2	First stage	1	WT3	21/08/2013	600	181200 - 181800 s	600	0
2	2	First stage	1	WT3	21/08/2013	600	181800 - 182400 s	600	0
2	2	First stage	1	WT3	21/08/2013	600	182400 - 183000 s	600	0
2	2	First stage	1	WT3	21/08/2013	600	183000 - 183600 s	600	0
2	2	First stage	1	WT3	21/08/2013	600	183600 - 184200 s	522	78
2	2	First stage	1	WT3	21/08/2013	600	184200 - 184800 s	167.7	432.3
2	2	First stage	1	WT3	21/08/2013	600	184800 - 185400 s	209	391
2	2	First stage	1	WT3	21/08/2013	600	185400 - 186000 s	108.1	491.9
2	2	First stage	1	WT3	21/08/2013	600	186000 - 186600 s	600	0
2	2	First stage	1	WT3	21/08/2013	600	186600 - 187200 s	423.3	176.8
2	2	First stage	1	WT3	21/08/2013	600	187200 - 187800 s	288.2	311.8
2	2	First stage	1	WT3	21/08/2013	600	187800 - 188400 s	300.4	299.6
2	2	First stage	1	WT3	21/08/2013	600	188400 - 189000 s	373.9	226.1
2	2	First stage	1	WT3	21/08/2013	600	189000 - 189600 s	600	0
2	2	First stage	1	WT3	21/08/2013	600	189600 - 190200 s	600	0
2	2	First stage	1	WT3	21/08/2013	600	190200 - 190800 s	330.4	269.6
2	2	First stage	1	WT3	21/08/2013	600	190800 - 191400 s	163.1	436.9
2	2	First stage	1	WT3	21/08/2013	600	191400 - 192000 s	110.2	489.8
2	2	First stage	1	WT3	21/08/2013	600	192000 - 192600 s	38.2	561.8
2	2	First stage	1	WT3	21/08/2013	600	192600 - 193200 s	416.4	183.6
2	2	First stage	1	WT3	21/08/2013	600	193200 - 193800 s	192.6	407.5
2	2	First stage	1	WT3	21/08/2013	600	193800 - 194400 s	592.3	7.7
2	2	First stage	1	WT3	21/08/2013	600	194400 - 195000 s	110.6	489.4
2	2	First stage	1	WT3	21/08/2013	600	195000 - 195600 s	454.3	145.7
2	2	First stage	1	WT3	21/08/2013	600	195600 - 196200 s	600	0
2	2	First stage	1	WT3	21/08/2013	600	196200 - 196800 s	600	0
2	2	First stage	1	WT3	21/08/2013	600	196800 - 197400 s	563.3	36.7
2	2	First stage	1	WT3	21/08/2013	600	197400 - 198000 s	555.2	44.8
2	2	First stage	1	WT3	21/08/2013	600	198000 - 198600 s	600	0
2	2	First stage	1	WT3	21/08/2013	600	198600 - 199200 s	600	0
2	2	First stage	1	WT3	21/08/2013	600	199200 - 199800 s	600	0
2	2	First stage	1	WT3	21/08/2013	600	199800 - 200400 s	600	0
2	2	First stage	1	WT3	21/08/2013	600	200400 - 201000 s	600	0
2	2	First stage	1	WT3	21/08/2013	600	201000 - 201600 s	600	0
2	2	First stage	1	WT3	21/08/2013	600	201600 - 202200 s	270.1	329.9
2	2	First stage	1	WT3	21/08/2013	600	202200 - 202800 s	58.6	541.4
2	2	First stage	1	WT3	21/08/2013	600	202800 - 203400 s	64	536
2	2	First stage	1	WT3	21/08/2013	600	203400 - 204000 s	131.2	468.8
2	2	First stage	1	WT3	21/08/2013	600	204000 - 204600 s	173.2	426.8
2	2	First stage	1	WT3	21/08/2013	600	204600 - 205200 s	99.9	500.1
2	2	First stage	1	WT3	21/08/2013	600	205200 - 205800 s	93.7	506.3
2	2	First stage	1	WT3	21/08/2013	600	205800 - 206400 s	102.6	497.4
2	2	First stage	1	WT3	21/08/2013	600	206400 - 207000 s	227.5	372.5
2	2	First stage	1	WT3	21/08/2013	600	207000 - 207600 s	75.9	524.1
2	2	First stage	1	WT3	21/08/2013	600	207600 - 208200 s	183.5	416.5
2	2	First stage	1	WT3	21/08/2013	600	208200 - 208800 s	600	0
2	2	First stage	1	WT3	21/08/2013	600	208800 - 209400 s	136.3	463.7
2	2	First stage	1	WT3	21/08/2013	600	209400 - 210000 s	156.8	443.2
2	2	First stage	1	WT3	21/08/2013	600	210000 - 210600 s	179.8	420.2
2	2	First stage	1	WT3	21/08/2013	600	210600 - 211200 s	492.5	107.5
2	2	First stage	1	WT3	21/08/2013	600	211200 - 211800 s	542.8	57.2
2	2	First stage	1	WT3	21/08/2013	600	211800 - 212400 s	275.2	324.8
2	2	First stage	1	WT3	21/08/2013	600	212400 - 213000 s	176	424
2	2	First stage	1	WT3	21/08/2013	600	213000 - 213600 s	207.9	392.1
2	2	First stage	1	WT3	21/08/2013	600	213600 - 214200 s	477.2	122.8
2	2	First stage	1	WT3	21/08/2013	600	214200 - 214800 s	552.2	47.8
2	2	First stage	1	WT3	21/08/2013	600	214800 - 215400 s	600	0
2	2	First stage	1	WT3	21/08/2013	600	215400 - 216000 s	600	0
3	4	First stage	1	WT1	21/08/2013	600	0 - 600 secs.	600	0
3	4	First stage	1	WT1	21/08/2013	600	600 - 1200 secs.	600	0
3	4	First stage	1	WT1	21/08/2013	600	1200 - 1800 secs.	547.4	52.6
3	4	First stage	1	WT1	21/08/2013	600	1800 - 2400 secs.	201.9	398.1
3	4	First stage	1	WT1	21/08/2013	600	2400 - 3000 secs.	600	0
3	4	First stage	1	WT1	21/08/2013	600	3000 - 3600 secs.	600	0
3	4	First stage	1	WT1	21/08/2013	600	3600 - 4200 secs.	600	0
3	4	First stage	1	WT1	21/08/2013	600	4200 - 4800 secs.	481.2	118.8
3	4	First stage	1	WT1	21/08/2013	600	4800 - 5400 secs.	469.9	130.1
3	4	First stage	1	WT1	21/08/2013	600	5400 - 6000 secs.	600	0
3	4	First stage	1	WT1	21/08/2013	600	6000 - 6600 secs.	600	0
3	4	First stage	1	WT1	21/08/2013	600	6600 - 7200 secs.	600	0
3	4	First stage	1	WT1	21/08/2013	600	7200 - 7800 secs.	600	0
3	4	First stage	1	WT1	21/08/2013	600	7800 - 8400 secs.	600	0
3	4	First stage	1	WT1	21/08/2013	600	8400 - 9000 secs.	600	0
3	4	First stage	1	WT1	21/08/2013	600	9000 - 9600 secs.	600	0
3	4	First stage	1	WT1	21/08/2013	600	9600 - 10200 secs	600	0
3	4	First stage	1	WT1	21/08/2013	600	10200 - 10800 sec	600	0
3	4	First stage	1	WT1	21/08/2013	600	10800 - 11400 sec	600	0
3	4	First stage	1	WT1	21/08/2013	600	11400 - 12000 sec	600	0
3	4	First stage	1	WT1	21/08/2013	600	12000 - 12600 sec	600	0
3	4	First stage	1	WT1	21/08/2013	600	12600 - 13200 sec	480.6	119.4
3	4	First stage	1	WT1	21/08/2013	600	13200 - 13800 sec	410.5	189.5
3	4	First stage	1	WT1	21/08/2013	600	13800 - 14400 sec	450	150
3	4	First stage	1	WT1	21/08/2013	600	14400 - 15000 sec	369.7	230.3
3	4	First stage	1	WT1	21/08/2013	600	15000 - 15600 sec	338.6	261.4
3	4	First stage	1	WT1	21/08/2013	600	15600 - 16200 sec	486.6	113.4
3	4	First stage	1	WT1	21/08/2013	600	16200 - 16800 sec	159	441.1
3	4	First stage	1	WT1	21/08/2013	600	16800 - 17400 sec	493.7	106.3
3	4	First stage	1	WT1	21/08/2013	600	17400 - 18000 sec	193.2	406.8
3	4	First stage	1	WT1	21/08/2013	600	18000 - 18600 sec	540.4	59.6
3	4	First stage	1	WT1	21/08/2013	600	18600 - 19200 sec	504.2	95.8
3	4	First stage	1	WT1	21/08/2013	600	19200 - 19800 sec	600	0
3	4	First stage	1	WT1	21/08/2013	600	19800 - 20400 sec	600	0
3	4	First stage	1	WT1	21/08/2013	600	20400 - 21000 sec	408	192
3	4	First stage	1	WT1	21/08/2013	600	21000 - 21600 sec	521.5	78.5
3	4	First stage	1	WT1	21/08/2013	600	21600 - 22200 sec	600	0
3	4	First stage	1	WT1	21/08/2013	600	22200 - 22800 sec	600	0
3	4	First stage	1	WT1	21/08/2013	600	22800 - 23400 sec	600	0
3	4	First stage	1	WT1	21/08/2013	600	23400 - 24000 sec	600	0
3	4	First stage	1	WT1	21/08/2013	600	24000 - 24600 sec	600	0
3	4	First stage	1	WT1	21/08/2013	600	24600 - 25200 sec	171.8	428.2
3	4	First stage	1	WT1	21/08/2013	600	25200 - 25800 sec	47.3	552.7
3	4	First stage	1	WT1	21/08/2013	600	25800 - 26400 sec	190.8	409.2
3	4	First stage	1	WT1	21/08/2013	600	26400 - 27000 sec	156.4	443.6
3	4	First stage	1	WT1	21/08/2013	600	27000 - 27600 sec	554.7	45.3
3	4	First stage	1	WT1	21/08/2013	600	27600 - 28200 sec	600	0
3	4	First stage	1	WT1	21/08/2013	600	28200 - 28800 sec	231.3	368.7
3	4	First stage	1	WT1	21/08/2013	600	28800 - 29400 sec	190.6	409.4
3	4	First stage	1	WT1	21/08/2013	600	29400 - 30000 sec	465.4	134.6
3	4	First stage	1	WT1	21/08/2013	600	30000 - 30600 sec	600	0
3	4	First stage	1	WT1	21/08/2013	600	30600 - 31200 sec	270.5	329.5
3	4	First stage	1	WT1	21/08/2013	600	31200 - 31800 sec	79.8	520.2
3	4	First stage	1	WT1	21/08/2013	600	31800 - 32400 sec	61.1	538.9
3	4	First stage	1	WT1	21/08/2013	600	32400 - 33000 sec	93	507
3	4	First stage	1	WT1	21/08/2013	600	33000 - 33600 sec	36.1	563.9
3	4	First stage	1	WT1	21/08/2013	600	33600 - 34200 sec	18.8	581.2
3	4	First stage	1	WT1	21/08/2013	600	34200 - 34800 sec	0.5	599.5
3	4	First stage	1	WT1	21/08/2013	600	34800 - 35400 sec	31.4	568.6
3	4	First stage	1	WT1	21/08/2013	600	35400 - 36000 sec	386.7	213.3
3	4	First stage	1	WT1	21/08/2013	600	36000 - 36600 sec	394.1	205.9
3	4	First stage	1	WT1	21/08/2013	600	36600 - 37200 sec	84.8	515.2
3	4	First stage	1	WT1	21/08/2013	600	37200 - 37800 sec	59.7	540.3
3	4	First stage	1	WT1	21/08/2013	600	37800 - 38400 sec	280.5	319.5
3	4	First stage	1	WT1	21/08/2013	600	38400 - 39000 sec	600	0
3	4	First stage	1	WT1	21/08/2013	600	39000 - 39600 sec	600	0
3	4	First stage	1	WT1	21/08/2013	600	39600 - 40200 sec	600	0
3	4	First stage	1	WT1	21/08/2013	600	40200 - 40800 sec	445.7	154.3
3	4	First stage	1	WT1	21/08/2013	600	40800 - 41400 sec	65.8	534.2
3	4	First stage	1	WT1	21/08/2013	600	41400 - 42000 sec	41.7	558.3
3	4	First stage	1	WT1	21/08/2013	600	42000 - 42600 sec	0	600
3	4	First stage	1	WT1	21/08/2013	600	42600 - 43200 sec	122.4	477.6
3	4	First stage	1	WT1	21/08/2013	600	43200 - 43800 sec	89.3	510.7
3	4	First stage	1	WT1	21/08/2013	600	43800 - 44400 sec	101.6	498.4
3	4	First stage	1	WT1	21/08/2013	600	44400 - 45000 sec	110.9	489.1
3	4	First stage	1	WT1	21/08/2013	600	45000 - 45600 sec	67.2	532.8
3	4	First stage	1	WT1	21/08/2013	600	45600 - 46200 sec	1	599
3	4	First stage	1	WT1	21/08/2013	600	46200 - 46800 sec	22.4	577.6
3	4	First stage	1	WT1	21/08/2013	600	46800 - 47400 sec	37.3	562.7
3	4	First stage	1	WT1	21/08/2013	600	47400 - 48000 sec	549.6	50.4
3	4	First stage	1	WT1	21/08/2013	600	48000 - 48600 sec	600	0
3	4	First stage	1	WT1	21/08/2013	600	48600 - 49200 sec	600	0
3	4	First stage	1	WT1	21/08/2013	600	49200 - 49800 sec	458.5	141.5
3	4	First stage	1	WT1	21/08/2013	600	49800 - 50400 sec	160.1	439.9
3	4	First stage	1	WT1	21/08/2013	600	50400 - 51000 sec	92.2	507.8
3	4	First stage	1	WT1	21/08/2013	600	51000 - 51600 sec	151.9	448.1
3	4	First stage	1	WT1	21/08/2013	600	51600 - 52200 sec	220.7	379.3
3	4	First stage	1	WT1	21/08/2013	600	52200 - 52800 sec	105.6	494.4
3	4	First stage	1	WT1	21/08/2013	600	52800 - 53400 sec	32.8	567.2
3	4	First stage	1	WT1	21/08/2013	600	53400 - 54000 sec	113.6	486.4
3	4	First stage	1	WT1	21/08/2013	600	54000 - 54600 sec	39	561
3	4	First stage	1	WT1	21/08/2013	600	54600 - 55200 sec	106.2	493.8
3	4	First stage	1	WT1	21/08/2013	600	55200 - 55800 sec	161.3	438.7
3	4	First stage	1	WT1	21/08/2013	600	55800 - 56400 sec	29.4	570.6
3	4	First stage	1	WT1	21/08/2013	600	56400 - 57000 sec	93.1	506.9
3	4	First stage	1	WT1	21/08/2013	600	57000 - 57600 sec	417.2	182.8
3	4	First stage	1	WT1	21/08/2013	600	57600 - 58200 sec	600	0
3	4	First stage	1	WT1	21/08/2013	600	58200 - 58800 sec	229.5	370.5
3	4	First stage	1	WT1	21/08/2013	600	58800 - 59400 sec	145.5	454.5
3	4	First stage	1	WT1	21/08/2013	600	59400 - 60000 sec	0.5	599.5
3	4	First stage	1	WT1	21/08/2013	600	60000 - 60600 sec	149	451.1
3	4	First stage	1	WT1	21/08/2013	600	60600 - 61200 sec	9.6	590.4
3	4	First stage	1	WT1	21/08/2013	600	61200 - 61800 sec	98.5	501.5
3	4	First stage	1	WT1	21/08/2013	600	61800 - 62400 sec	50.2	549.8
3	4	First stage	1	WT1	21/08/2013	600	62400 - 63000 sec	65.3	534.7
3	4	First stage	1	WT1	21/08/2013	600	63000 - 63600 sec	76.6	523.4
3	4	First stage	1	WT1	21/08/2013	600	63600 - 64200 sec	67	533
3	4	First stage	1	WT1	21/08/2013	600	64200 - 64800 sec	513.1	86.9
3	4	First stage	1	WT1	21/08/2013	600	64800 - 65400 sec	152.7	447.3
3	4	First stage	1	WT1	21/08/2013	600	65400 - 66000 sec	39.5	560.5
3	4	First stage	1	WT1	21/08/2013	600	66000 - 66600 sec	86.6	513.4
3	4	First stage	1	WT1	21/08/2013	600	66600 - 67200 sec	25.6	574.4
3	4	First stage	1	WT1	21/08/2013	600	67200 - 67800 sec	49.4	550.6
3	4	First stage	1	WT1	21/08/2013	600	67800 - 68400 sec	130.2	469.8
3	4	First stage	1	WT1	21/08/2013	600	68400 - 69000 sec	213.7	386.3
3	4	First stage	1	WT1	21/08/2013	600	69000 - 69600 sec	600	0
3	4	First stage	1	WT1	21/08/2013	600	69600 - 70200 sec	297.1	302.9
3	4	First stage	1	WT1	21/08/2013	600	70200 - 70800 sec	64.4	535.6
3	4	First stage	1	WT1	21/08/2013	600	70800 - 71400 sec	127.2	472.9
3	4	First stage	1	WT1	21/08/2013	600	71400 - 72000 sec	108.9	491.1
3	4	First stage	1	WT1	21/08/2013	600	72000 - 72600 sec	124.5	475.5
3	4	First stage	1	WT1	21/08/2013	600	72600 - 73200 sec	302.7	297.3
3	4	First stage	1	WT1	21/08/2013	600	73200 - 73800 sec	600	0
3	4	First stage	1	WT1	21/08/2013	600	73800 - 74400 sec	600	0
3	4	First stage	1	WT1	21/08/2013	600	74400 - 75000 sec	600	0
3	4	First stage	1	WT1	21/08/2013	600	75000 - 75600 sec	484.3	115.8
3	4	First stage	1	WT1	21/08/2013	600	75600 - 76200 sec	158.6	441.4
3	4	First stage	1	WT1	21/08/2013	600	76200 - 76800 sec	35.2	564.8
3	4	First stage	1	WT1	21/08/2013	600	76800 - 77400 sec	94	506
3	4	First stage	1	WT1	21/08/2013	600	77400 - 78000 sec	111.5	488.5
3	4	First stage	1	WT1	21/08/2013	600	78000 - 78600 sec	91.4	508.6
3	4	First stage	1	WT1	21/08/2013	600	78600 - 79200 sec	293.7	306.3
3	4	First stage	1	WT1	21/08/2013	600	79200 - 79800 sec	496.4	103.6
3	4	First stage	1	WT1	21/08/2013	600	79800 - 80400 sec	361.1	238.9
3	4	First stage	1	WT1	21/08/2013	600	80400 - 81000 sec	162.6	437.5
3	4	First stage	1	WT1	21/08/2013	600	81000 - 81600 sec	63.2	536.8
3	4	First stage	1	WT1	21/08/2013	600	81600 - 82200 sec	145.6	454.4
3	4	First stage	1	WT1	21/08/2013	600	82200 - 82800 sec	395.4	204.6
3	4	First stage	1	WT1	21/08/2013	600	82800 - 83400 sec	219.3	380.7
3	4	First stage	1	WT1	21/08/2013	600	83400 - 84000 sec	218.1	381.9
3	4	First stage	1	WT1	21/08/2013	600	84000 - 84600 sec	600	0
3	4	First stage	1	WT1	21/08/2013	600	84600 - 85200 sec	368.6	231.4
3	4	First stage	1	WT1	21/08/2013	600	85200 - 85800 sec	106.4	493.6
3	4	First stage	1	WT1	21/08/2013	600	85800 - 86400 sec	393.6	206.4
3	4	First stage	1	WT1	21/08/2013	600	86400 - 87000 sec	600	0
3	4	First stage	1	WT1	21/08/2013	600	87000 - 87600 sec	600	0
3	4	First stage	1	WT1	21/08/2013	600	87600 - 88200 sec	600	0
3	4	First stage	1	WT1	21/08/2013	600	88200 - 88800 sec	600	0
3	4	First stage	1	WT1	21/08/2013	600	88800 - 89400 sec	600	0
3	4	First stage	1	WT1	21/08/2013	600	89400 - 90000 sec	600	0
3	4	First stage	1	WT1	21/08/2013	600	90000 - 90600 sec	600	0
3	4	First stage	1	WT1	21/08/2013	600	90600 - 91200 sec	433.6	166.4
3	4	First stage	1	WT1	21/08/2013	600	91200 - 91800 sec	207.8	392.2
3	4	First stage	1	WT1	21/08/2013	600	91800 - 92400 sec	583.8	16.2
3	4	First stage	1	WT1	21/08/2013	600	92400 - 93000 sec	600	0
3	4	First stage	1	WT1	21/08/2013	600	93000 - 93600 sec	600	0
3	4	First stage	1	WT1	21/08/2013	600	93600 - 94200 sec	600	0
3	4	First stage	1	WT1	21/08/2013	600	94200 - 94800 sec	38.6	561.4
3	4	First stage	1	WT1	21/08/2013	600	94800 - 95400 sec	79.9	520.1
3	4	First stage	1	WT1	21/08/2013	600	95400 - 96000 sec	5.7	594.3
3	4	First stage	1	WT1	21/08/2013	600	96000 - 96600 sec	170.9	429.1
3	4	First stage	1	WT1	21/08/2013	600	96600 - 97200 sec	588.8	11.2
3	4	First stage	1	WT1	21/08/2013	600	97200 - 97800 sec	374.3	225.7
3	4	First stage	1	WT1	21/08/2013	600	97800 - 98400 sec	600	0
3	4	First stage	1	WT1	21/08/2013	600	98400 - 99000 sec	600	0
3	4	First stage	1	WT1	21/08/2013	600	99000 - 99600 sec	546.1	53.9
3	4	First stage	1	WT1	21/08/2013	600	99600 - 100200 se	600	0
3	4	First stage	1	WT1	21/08/2013	600	100200 - 100800 s	600	0
3	4	First stage	1	WT1	21/08/2013	600	100800 - 101400 s	600	0
3	4	First stage	1	WT1	21/08/2013	600	101400 - 102000 s	600	0
3	4	First stage	1	WT1	21/08/2013	600	102000 - 102600 s	600	0
3	4	First stage	1	WT1	21/08/2013	600	102600 - 103200 s	600	0
3	4	First stage	1	WT1	21/08/2013	600	103200 - 103800 s	515.3	84.7
3	4	First stage	1	WT1	21/08/2013	600	103800 - 104400 s	600	0
3	4	First stage	1	WT1	21/08/2013	600	104400 - 105000 s	600	0
3	4	First stage	1	WT1	21/08/2013	600	105000 - 105600 s	600	0
3	4	First stage	1	WT1	21/08/2013	600	105600 - 106200 s	600	0
3	4	First stage	1	WT1	21/08/2013	600	106200 - 106800 s	313.5	286.5
3	4	First stage	1	WT1	21/08/2013	600	106800 - 107400 s	218.4	381.6
3	4	First stage	1	WT1	21/08/2013	600	107400 - 108000 s	90.9	509.1
3	4	First stage	1	WT1	21/08/2013	600	108000 - 108600 s	200.5	399.5
3	4	First stage	1	WT1	21/08/2013	600	108600 - 109200 s	145.7	454.3
3	4	First stage	1	WT1	21/08/2013	600	109200 - 109800 s	600	0
3	4	First stage	1	WT1	21/08/2013	600	109800 - 110400 s	600	0
3	4	First stage	1	WT1	21/08/2013	600	110400 - 111000 s	600	0
3	4	First stage	1	WT1	21/08/2013	600	111000 - 111600 s	252.3	347.7
3	4	First stage	1	WT1	21/08/2013	600	111600 - 112200 s	216.5	383.5
3	4	First stage	1	WT1	21/08/2013	600	112200 - 112800 s	52.8	547.2
3	4	First stage	1	WT1	21/08/2013	600	112800 - 113400 s	273.2	326.8
3	4	First stage	1	WT1	21/08/2013	600	113400 - 114000 s	63.5	536.5
3	4	First stage	1	WT1	21/08/2013	600	114000 - 114600 s	410	190
3	4	First stage	1	WT1	21/08/2013	600	114600 - 115200 s	600	0
3	4	First stage	1	WT1	21/08/2013	600	115200 - 115800 s	600	0
3	4	First stage	1	WT1	21/08/2013	600	115800 - 116400 s	600	0
3	4	First stage	1	WT1	21/08/2013	600	116400 - 117000 s	600	0
3	4	First stage	1	WT1	21/08/2013	600	117000 - 117600 s	600	0
3	4	First stage	1	WT1	21/08/2013	600	117600 - 118200 s	600	0
3	4	First stage	1	WT1	21/08/2013	600	118200 - 118800 s	600	0
3	4	First stage	1	WT1	21/08/2013	600	118800 - 119400 s	600	0
3	4	First stage	1	WT1	21/08/2013	600	119400 - 120000 s	520.9	79.1
3	4	First stage	1	WT1	21/08/2013	600	120000 - 120600 s	155.6	444.4
3	4	First stage	1	WT1	21/08/2013	600	120600 - 121200 s	79.7	520.3
3	4	First stage	1	WT1	21/08/2013	600	121200 - 121800 s	61	539
3	4	First stage	1	WT1	21/08/2013	600	121800 - 122400 s	17.4	582.6
3	4	First stage	1	WT1	21/08/2013	600	122400 - 123000 s	52	548
3	4	First stage	1	WT1	21/08/2013	600	123000 - 123600 s	58.7	541.3
3	4	First stage	1	WT1	21/08/2013	600	123600 - 124200 s	126.2	473.8
3	4	First stage	1	WT1	21/08/2013	600	124200 - 124800 s	476.8	123.2
3	4	First stage	1	WT1	21/08/2013	600	124800 - 125400 s	263.8	336.2
3	4	First stage	1	WT1	21/08/2013	600	125400 - 126000 s	67.4	532.6
3	4	First stage	1	WT1	21/08/2013	600	126000 - 126600 s	164.6	435.4
3	4	First stage	1	WT1	21/08/2013	600	126600 - 127200 s	69.2	530.8
3	4	First stage	1	WT1	21/08/2013	600	127200 - 127800 s	145.8	454.2
3	4	First stage	1	WT1	21/08/2013	600	127800 - 128400 s	82.3	517.7
3	4	First stage	1	WT1	21/08/2013	600	128400 - 129000 s	499.5	100.6
3	4	First stage	1	WT1	21/08/2013	600	129000 - 129600 s	409.9	190.1
3	4	First stage	1	WT1	21/08/2013	600	129600 - 130200 s	59.9	540.1
3	4	First stage	1	WT1	21/08/2013	600	130200 - 130800 s	19	581
3	4	First stage	1	WT1	21/08/2013	600	130800 - 131400 s	78.2	521.8
3	4	First stage	1	WT1	21/08/2013	600	131400 - 132000 s	282.4	317.6
3	4	First stage	1	WT1	21/08/2013	600	132000 - 132600 s	59.4	540.6
3	4	First stage	1	WT1	21/08/2013	600	132600 - 133200 s	51.6	548.4
3	4	First stage	1	WT1	21/08/2013	600	133200 - 133800 s	36.2	563.8
3	4	First stage	1	WT1	21/08/2013	600	133800 - 134400 s	80.1	519.9
3	4	First stage	1	WT1	21/08/2013	600	134400 - 135000 s	40.6	559.4
3	4	First stage	1	WT1	21/08/2013	600	135000 - 135600 s	61.1	538.9
3	4	First stage	1	WT1	21/08/2013	600	135600 - 136200 s	195.5	404.5
3	4	First stage	1	WT1	21/08/2013	600	136200 - 136800 s	600	0
3	4	First stage	1	WT1	21/08/2013	600	136800 - 137400 s	472.8	127.2
3	4	First stage	1	WT1	21/08/2013	600	137400 - 138000 s	600	0
3	4	First stage	1	WT1	21/08/2013	600	138000 - 138600 s	600	0
3	4	First stage	1	WT1	21/08/2013	600	138600 - 139200 s	264.1	336
3	4	First stage	1	WT1	21/08/2013	600	139200 - 139800 s	95.1	504.9
3	4	First stage	1	WT1	21/08/2013	600	139800 - 140400 s	162.8	437.2
3	4	First stage	1	WT1	21/08/2013	600	140400 - 141000 s	95.5	504.5
3	4	First stage	1	WT1	21/08/2013	600	141000 - 141600 s	74.6	525.4
3	4	First stage	1	WT1	21/08/2013	600	141600 - 142200 s	138.6	461.4
3	4	First stage	1	WT1	21/08/2013	600	142200 - 142800 s	149.6	450.4
3	4	First stage	1	WT1	21/08/2013	600	142800 - 143400 s	86.7	513.3
3	4	First stage	1	WT1	21/08/2013	600	143400 - 144000 s	119	481
3	4	First stage	1	WT1	21/08/2013	600	144000 - 144600 s	64.3	535.7
3	4	First stage	1	WT1	21/08/2013	600	144600 - 145200 s	83	517
3	4	First stage	1	WT1	21/08/2013	600	145200 - 145800 s	69.6	530.4
3	4	First stage	1	WT1	21/08/2013	600	145800 - 146400 s	475.5	124.5
3	4	First stage	1	WT1	21/08/2013	600	146400 - 147000 s	387.8	212.2
3	4	First stage	1	WT1	21/08/2013	600	147000 - 147600 s	27.9	572.1
3	4	First stage	1	WT1	21/08/2013	600	147600 - 148200 s	123.2	476.8
3	4	First stage	1	WT1	21/08/2013	600	148200 - 148800 s	66	534.1
3	4	First stage	1	WT1	21/08/2013	600	148800 - 149400 s	161.9	438.1
3	4	First stage	1	WT1	21/08/2013	600	149400 - 150000 s	191.7	408.3
3	4	First stage	1	WT1	21/08/2013	600	150000 - 150600 s	69.5	530.5
3	4	First stage	1	WT1	21/08/2013	600	150600 - 151200 s	81.1	518.9
3	4	First stage	1	WT1	21/08/2013	600	151200 - 151800 s	80.1	519.9
3	4	First stage	1	WT1	21/08/2013	600	151800 - 152400 s	547.8	52.2
3	4	First stage	1	WT1	21/08/2013	600	152400 - 153000 s	600	0
3	4	First stage	1	WT1	21/08/2013	600	153000 - 153600 s	600	0
3	4	First stage	1	WT1	21/08/2013	600	153600 - 154200 s	491.5	108.5
3	4	First stage	1	WT1	21/08/2013	600	154200 - 154800 s	46.3	553.7
3	4	First stage	1	WT1	21/08/2013	600	154800 - 155400 s	114.7	485.4
3	4	First stage	1	WT1	21/08/2013	600	155400 - 156000 s	18.8	581.2
3	4	First stage	1	WT1	21/08/2013	600	156000 - 156600 s	90.1	509.9
3	4	First stage	1	WT1	21/08/2013	600	156600 - 157200 s	20.9	579.1
3	4	First stage	1	WT1	21/08/2013	600	157200 - 157800 s	61.9	538.1
3	4	First stage	1	WT1	21/08/2013	600	157800 - 158400 s	63.3	536.7
3	4	First stage	1	WT1	21/08/2013	600	158400 - 159000 s	66.4	533.6
3	4	First stage	1	WT1	21/08/2013	600	159000 - 159600 s	127.6	472.4
3	4	First stage	1	WT1	21/08/2013	600	159600 - 160200 s	93.9	506.1
3	4	First stage	1	WT1	21/08/2013	600	160200 - 160800 s	8.3	591.7
3	4	First stage	1	WT1	21/08/2013	600	160800 - 161400 s	151.7	448.3
3	4	First stage	1	WT1	21/08/2013	600	161400 - 162000 s	174.8	425.2
3	4	First stage	1	WT1	21/08/2013	600	162000 - 162600 s	600	0
3	4	First stage	1	WT1	21/08/2013	600	162600 - 163200 s	543.4	56.6
3	4	First stage	1	WT1	21/08/2013	600	163200 - 163800 s	248.3	351.7
3	4	First stage	1	WT1	21/08/2013	600	163800 - 164400 s	218.9	381.1
3	4	First stage	1	WT1	21/08/2013	600	164400 - 165000 s	35.8	564.2
3	4	First stage	1	WT1	21/08/2013	600	165000 - 165600 s	93.5	506.5
3	4	First stage	1	WT1	21/08/2013	600	165600 - 166200 s	191.9	408.1
3	4	First stage	1	WT1	21/08/2013	600	166200 - 166800 s	113.1	486.9
3	4	First stage	1	WT1	21/08/2013	600	166800 - 167400 s	439	161
3	4	First stage	1	WT1	21/08/2013	600	167400 - 168000 s	382.2	217.8
3	4	First stage	1	WT1	21/08/2013	600	168000 - 168600 s	49	551
3	4	First stage	1	WT1	21/08/2013	600	168600 - 169200 s	448	152
3	4	First stage	1	WT1	21/08/2013	600	169200 - 169800 s	600	0
3	4	First stage	1	WT1	21/08/2013	600	169800 - 170400 s	600	0
3	4	First stage	1	WT1	21/08/2013	600	170400 - 171000 s	600	0
3	4	First stage	1	WT1	21/08/2013	600	171000 - 171600 s	311.9	288.1
3	4	First stage	1	WT1	21/08/2013	600	171600 - 172200 s	123.5	476.5
3	4	First stage	1	WT1	21/08/2013	600	172200 - 172800 s	369.5	230.5
3	4	First stage	1	WT1	21/08/2013	600	172800 - 173400 s	600	0
3	4	First stage	1	WT1	21/08/2013	600	173400 - 174000 s	600	0
3	4	First stage	1	WT1	21/08/2013	600	174000 - 174600 s	600	0
3	4	First stage	1	WT1	21/08/2013	600	174600 - 175200 s	600	0
3	4	First stage	1	WT1	21/08/2013	600	175200 - 175800 s	600	0
3	4	First stage	1	WT1	21/08/2013	600	175800 - 176400 s	487.5	112.5
3	4	First stage	1	WT1	21/08/2013	600	176400 - 177000 s	550.5	49.5
3	4	First stage	1	WT1	21/08/2013	600	177000 - 177600 s	600	0
3	4	First stage	1	WT1	21/08/2013	600	177600 - 178200 s	418.6	181.4
3	4	First stage	1	WT1	21/08/2013	600	178200 - 178800 s	277.4	322.6
3	4	First stage	1	WT1	21/08/2013	600	178800 - 179400 s	600	0
3	4	First stage	1	WT1	21/08/2013	600	179400 - 180000 s	397.3	202.7
3	4	First stage	1	WT1	21/08/2013	600	180000 - 180600 s	489.3	110.7
3	4	First stage	1	WT1	21/08/2013	600	180600 - 181200 s	600	0
3	4	First stage	1	WT1	21/08/2013	600	181200 - 181800 s	600	0
3	4	First stage	1	WT1	21/08/2013	600	181800 - 182400 s	600	0
3	4	First stage	1	WT1	21/08/2013	600	182400 - 183000 s	600	0
3	4	First stage	1	WT1	21/08/2013	600	183000 - 183600 s	600	0
3	4	First stage	1	WT1	21/08/2013	600	183600 - 184200 s	487.6	112.4
3	4	First stage	1	WT1	21/08/2013	600	184200 - 184800 s	230.7	369.3
3	4	First stage	1	WT1	21/08/2013	600	184800 - 185400 s	600	0
3	4	First stage	1	WT1	21/08/2013	600	185400 - 186000 s	292	308
3	4	First stage	1	WT1	21/08/2013	600	186000 - 186600 s	429.4	170.6
3	4	First stage	1	WT1	21/08/2013	600	186600 - 187200 s	600	0
3	4	First stage	1	WT1	21/08/2013	600	187200 - 187800 s	600	0
3	4	First stage	1	WT1	21/08/2013	600	187800 - 188400 s	600	0
3	4	First stage	1	WT1	21/08/2013	600	188400 - 189000 s	600	0
3	4	First stage	1	WT1	21/08/2013	600	189000 - 189600 s	405.9	194.1
3	4	First stage	1	WT1	21/08/2013	600	189600 - 190200 s	131.3	468.7
3	4	First stage	1	WT1	21/08/2013	600	190200 - 190800 s	115.9	484.1
3	4	First stage	1	WT1	21/08/2013	600	190800 - 191400 s	564.3	35.8
3	4	First stage	1	WT1	21/08/2013	600	191400 - 192000 s	477.5	122.5
3	4	First stage	1	WT1	21/08/2013	600	192000 - 192600 s	103.8	496.2
3	4	First stage	1	WT1	21/08/2013	600	192600 - 193200 s	202.8	397.2
3	4	First stage	1	WT1	21/08/2013	600	193200 - 193800 s	161	439
3	4	First stage	1	WT1	21/08/2013	600	193800 - 194400 s	461.6	138.4
3	4	First stage	1	WT1	21/08/2013	600	194400 - 195000 s	600	0
3	4	First stage	1	WT1	21/08/2013	600	195000 - 195600 s	600	0
3	4	First stage	1	WT1	21/08/2013	600	195600 - 196200 s	600	0
3	4	First stage	1	WT1	21/08/2013	600	196200 - 196800 s	600	0
3	4	First stage	1	WT1	21/08/2013	600	196800 - 197400 s	477.2	122.9
3	4	First stage	1	WT1	21/08/2013	600	197400 - 198000 s	190.9	409.1
3	4	First stage	1	WT1	21/08/2013	600	198000 - 198600 s	152.5	447.5
3	4	First stage	1	WT1	21/08/2013	600	198600 - 199200 s	274.2	325.8
3	4	First stage	1	WT1	21/08/2013	600	199200 - 199800 s	125.3	474.7
3	4	First stage	1	WT1	21/08/2013	600	199800 - 200400 s	72.4	527.6
3	4	First stage	1	WT1	21/08/2013	600	200400 - 201000 s	70.5	529.5
3	4	First stage	1	WT1	21/08/2013	600	201000 - 201600 s	124.7	475.3
3	4	First stage	1	WT1	21/08/2013	600	201600 - 202200 s	50.7	549.3
3	4	First stage	1	WT1	21/08/2013	600	202200 - 202800 s	273.3	326.8
3	4	First stage	1	WT1	21/08/2013	600	202800 - 203400 s	67.2	532.8
3	4	First stage	1	WT1	21/08/2013	600	203400 - 204000 s	600	0
3	4	First stage	1	WT1	21/08/2013	600	204000 - 204600 s	600	0
3	4	First stage	1	WT1	21/08/2013	600	204600 - 205200 s	600	0
3	4	First stage	1	WT1	21/08/2013	600	205200 - 205800 s	65.6	534.4
3	4	First stage	1	WT1	21/08/2013	600	205800 - 206400 s	42.7	557.3
3	4	First stage	1	WT1	21/08/2013	600	206400 - 207000 s	196.9	403.1
3	4	First stage	1	WT1	21/08/2013	600	207000 - 207600 s	183	417.1
3	4	First stage	1	WT1	21/08/2013	600	207600 - 208200 s	127.5	472.5
3	4	First stage	1	WT1	21/08/2013	600	208200 - 208800 s	150.4	449.6
3	4	First stage	1	WT1	21/08/2013	600	208800 - 209400 s	481.6	118.4
3	4	First stage	1	WT1	21/08/2013	600	209400 - 210000 s	460.5	139.5
3	4	First stage	1	WT1	21/08/2013	600	210000 - 210600 s	112	488.1
3	4	First stage	1	WT1	21/08/2013	600	210600 - 211200 s	183.8	416.2
3	4	First stage	1	WT1	21/08/2013	600	211200 - 211800 s	145.6	454.4
3	4	First stage	1	WT1	21/08/2013	600	211800 - 212400 s	534.9	65.1
3	4	First stage	1	WT1	21/08/2013	600	212400 - 213000 s	600	0
3	4	First stage	1	WT1	21/08/2013	600	213000 - 213600 s	393.2	206.8
3	4	First stage	1	WT1	21/08/2013	600	213600 - 214200 s	103.5	496.6
3	4	First stage	1	WT1	21/08/2013	600	214200 - 214800 s	221	379
3	4	First stage	1	WT1	21/08/2013	600	214800 - 215400 s	32.5	567.5
3	4	First stage	1	WT1	21/08/2013	600	215400 - 216000 s	118.7	481.3
4	3	First stage	1	WT2	21/08/2013	600	0 - 600 secs.	600	0
4	3	First stage	1	WT2	21/08/2013	600	600 - 1200 secs.	600	0
4	3	First stage	1	WT2	21/08/2013	600	1200 - 1800 secs.	600	0
4	3	First stage	1	WT2	21/08/2013	600	1800 - 2400 secs.	600	0
4	3	First stage	1	WT2	21/08/2013	600	2400 - 3000 secs.	514.4	85.7
4	3	First stage	1	WT2	21/08/2013	600	3000 - 3600 secs.	600	0
4	3	First stage	1	WT2	21/08/2013	600	3600 - 4200 secs.	600	0
4	3	First stage	1	WT2	21/08/2013	600	4200 - 4800 secs.	600	0
4	3	First stage	1	WT2	21/08/2013	600	4800 - 5400 secs.	600	0
4	3	First stage	1	WT2	21/08/2013	600	5400 - 6000 secs.	600	0
4	3	First stage	1	WT2	21/08/2013	600	6000 - 6600 secs.	600	0
4	3	First stage	1	WT2	21/08/2013	600	6600 - 7200 secs.	600	0
4	3	First stage	1	WT2	21/08/2013	600	7200 - 7800 secs.	600	0
4	3	First stage	1	WT2	21/08/2013	600	7800 - 8400 secs.	600	0
4	3	First stage	1	WT2	21/08/2013	600	8400 - 9000 secs.	600	0
4	3	First stage	1	WT2	21/08/2013	600	9000 - 9600 secs.	600	0
4	3	First stage	1	WT2	21/08/2013	600	9600 - 10200 secs	600	0
4	3	First stage	1	WT2	21/08/2013	600	10200 - 10800 sec	600	0
4	3	First stage	1	WT2	21/08/2013	600	10800 - 11400 sec	600	0
4	3	First stage	1	WT2	21/08/2013	600	11400 - 12000 sec	600	0
4	3	First stage	1	WT2	21/08/2013	600	12000 - 12600 sec	600	0
4	3	First stage	1	WT2	21/08/2013	600	12600 - 13200 sec	600	0
4	3	First stage	1	WT2	21/08/2013	600	13200 - 13800 sec	600	0
4	3	First stage	1	WT2	21/08/2013	600	13800 - 14400 sec	600	0
4	3	First stage	1	WT2	21/08/2013	600	14400 - 15000 sec	312.9	287.1
4	3	First stage	1	WT2	21/08/2013	600	15000 - 15600 sec	202.6	397.4
4	3	First stage	1	WT2	21/08/2013	600	15600 - 16200 sec	111	489
4	3	First stage	1	WT2	21/08/2013	600	16200 - 16800 sec	218.6	381.4
4	3	First stage	1	WT2	21/08/2013	600	16800 - 17400 sec	532	68
4	3	First stage	1	WT2	21/08/2013	600	17400 - 18000 sec	547	53
4	3	First stage	1	WT2	21/08/2013	600	18000 - 18600 sec	600	0
4	3	First stage	1	WT2	21/08/2013	600	18600 - 19200 sec	600	0
4	3	First stage	1	WT2	21/08/2013	600	19200 - 19800 sec	600	0
4	3	First stage	1	WT2	21/08/2013	600	19800 - 20400 sec	571.8	28.2
4	3	First stage	1	WT2	21/08/2013	600	20400 - 21000 sec	148.6	451.4
4	3	First stage	1	WT2	21/08/2013	600	21000 - 21600 sec	190.6	409.4
4	3	First stage	1	WT2	21/08/2013	600	21600 - 22200 sec	115.4	484.6
4	3	First stage	1	WT2	21/08/2013	600	22200 - 22800 sec	340.9	259.1
4	3	First stage	1	WT2	21/08/2013	600	22800 - 23400 sec	96.4	503.6
4	3	First stage	1	WT2	21/08/2013	600	23400 - 24000 sec	272.8	327.2
4	3	First stage	1	WT2	21/08/2013	600	24000 - 24600 sec	600	0
4	3	First stage	1	WT2	21/08/2013	600	24600 - 25200 sec	600	0
4	3	First stage	1	WT2	21/08/2013	600	25200 - 25800 sec	600	0
4	3	First stage	1	WT2	21/08/2013	600	25800 - 26400 sec	600	0
4	3	First stage	1	WT2	21/08/2013	600	26400 - 27000 sec	600	0
4	3	First stage	1	WT2	21/08/2013	600	27000 - 27600 sec	128.5	471.5
4	3	First stage	1	WT2	21/08/2013	600	27600 - 28200 sec	318	282
4	3	First stage	1	WT2	21/08/2013	600	28200 - 28800 sec	175	425
4	3	First stage	1	WT2	21/08/2013	600	28800 - 29400 sec	122.7	477.3
4	3	First stage	1	WT2	21/08/2013	600	29400 - 30000 sec	56	544
4	3	First stage	1	WT2	21/08/2013	600	30000 - 30600 sec	171.6	428.4
4	3	First stage	1	WT2	21/08/2013	600	30600 - 31200 sec	100.3	499.7
4	3	First stage	1	WT2	21/08/2013	600	31200 - 31800 sec	397.7	202.3
4	3	First stage	1	WT2	21/08/2013	600	31800 - 32400 sec	600	0
4	3	First stage	1	WT2	21/08/2013	600	32400 - 33000 sec	600	0
4	3	First stage	1	WT2	21/08/2013	600	33000 - 33600 sec	600	0
4	3	First stage	1	WT2	21/08/2013	600	33600 - 34200 sec	600	0
4	3	First stage	1	WT2	21/08/2013	600	34200 - 34800 sec	600	0
4	3	First stage	1	WT2	21/08/2013	600	34800 - 35400 sec	137.4	462.6
4	3	First stage	1	WT2	21/08/2013	600	35400 - 36000 sec	163.3	436.7
4	3	First stage	1	WT2	21/08/2013	600	36000 - 36600 sec	119.3	480.7
4	3	First stage	1	WT2	21/08/2013	600	36600 - 37200 sec	223.3	376.7
4	3	First stage	1	WT2	21/08/2013	600	37200 - 37800 sec	169.9	430.1
4	3	First stage	1	WT2	21/08/2013	600	37800 - 38400 sec	36.5	563.5
4	3	First stage	1	WT2	21/08/2013	600	38400 - 39000 sec	175.3	424.7
4	3	First stage	1	WT2	21/08/2013	600	39000 - 39600 sec	266.8	333.2
4	3	First stage	1	WT2	21/08/2013	600	39600 - 40200 sec	600	0
4	3	First stage	1	WT2	21/08/2013	600	40200 - 40800 sec	600	0
4	3	First stage	1	WT2	21/08/2013	600	40800 - 41400 sec	600	0
4	3	First stage	1	WT2	21/08/2013	600	41400 - 42000 sec	600	0
4	3	First stage	1	WT2	21/08/2013	600	42000 - 42600 sec	600	0
4	3	First stage	1	WT2	21/08/2013	600	42600 - 43200 sec	600	0
4	3	First stage	1	WT2	21/08/2013	600	43200 - 43800 sec	600	0
4	3	First stage	1	WT2	21/08/2013	600	43800 - 44400 sec	108	492
4	3	First stage	1	WT2	21/08/2013	600	44400 - 45000 sec	171.6	428.4
4	3	First stage	1	WT2	21/08/2013	600	45000 - 45600 sec	106.1	493.9
4	3	First stage	1	WT2	21/08/2013	600	45600 - 46200 sec	102.3	497.7
4	3	First stage	1	WT2	21/08/2013	600	46200 - 46800 sec	42.1	557.9
4	3	First stage	1	WT2	21/08/2013	600	46800 - 47400 sec	85.8	514.2
4	3	First stage	1	WT2	21/08/2013	600	47400 - 48000 sec	359.4	240.6
4	3	First stage	1	WT2	21/08/2013	600	48000 - 48600 sec	392.5	207.5
4	3	First stage	1	WT2	21/08/2013	600	48600 - 49200 sec	84.8	515.2
4	3	First stage	1	WT2	21/08/2013	600	49200 - 49800 sec	143	457
4	3	First stage	1	WT2	21/08/2013	600	49800 - 50400 sec	27.1	572.9
4	3	First stage	1	WT2	21/08/2013	600	50400 - 51000 sec	41	559
4	3	First stage	1	WT2	21/08/2013	600	51000 - 51600 sec	36.5	563.5
4	3	First stage	1	WT2	21/08/2013	600	51600 - 52200 sec	61.4	538.6
4	3	First stage	1	WT2	21/08/2013	600	52200 - 52800 sec	81.7	518.3
4	3	First stage	1	WT2	21/08/2013	600	52800 - 53400 sec	65.5	534.5
4	3	First stage	1	WT2	21/08/2013	600	53400 - 54000 sec	589.7	10.3
4	3	First stage	1	WT2	21/08/2013	600	54000 - 54600 sec	600	0
4	3	First stage	1	WT2	21/08/2013	600	54600 - 55200 sec	600	0
4	3	First stage	1	WT2	21/08/2013	600	55200 - 55800 sec	600	0
4	3	First stage	1	WT2	21/08/2013	600	55800 - 56400 sec	82.9	517.1
4	3	First stage	1	WT2	21/08/2013	600	56400 - 57000 sec	57	543.1
4	3	First stage	1	WT2	21/08/2013	600	57000 - 57600 sec	116.6	483.4
4	3	First stage	1	WT2	21/08/2013	600	57600 - 58200 sec	40.6	559.4
4	3	First stage	1	WT2	21/08/2013	600	58200 - 58800 sec	21.8	578.2
4	3	First stage	1	WT2	21/08/2013	600	58800 - 59400 sec	124	476
4	3	First stage	1	WT2	21/08/2013	600	59400 - 60000 sec	58.9	541.1
4	3	First stage	1	WT2	21/08/2013	600	60000 - 60600 sec	127.1	472.9
4	3	First stage	1	WT2	21/08/2013	600	60600 - 61200 sec	160.1	439.9
4	3	First stage	1	WT2	21/08/2013	600	61200 - 61800 sec	0	600
4	3	First stage	1	WT2	21/08/2013	600	61800 - 62400 sec	78.6	521.4
4	3	First stage	1	WT2	21/08/2013	600	62400 - 63000 sec	204.2	395.8
4	3	First stage	1	WT2	21/08/2013	600	63000 - 63600 sec	206.2	393.8
4	3	First stage	1	WT2	21/08/2013	600	63600 - 64200 sec	433.1	166.9
4	3	First stage	1	WT2	21/08/2013	600	64200 - 64800 sec	600	0
4	3	First stage	1	WT2	21/08/2013	600	64800 - 65400 sec	148	452
4	3	First stage	1	WT2	21/08/2013	600	65400 - 66000 sec	140.5	459.5
4	3	First stage	1	WT2	21/08/2013	600	66000 - 66600 sec	67.8	532.2
4	3	First stage	1	WT2	21/08/2013	600	66600 - 67200 sec	43.7	556.3
4	3	First stage	1	WT2	21/08/2013	600	67200 - 67800 sec	36.2	563.8
4	3	First stage	1	WT2	21/08/2013	600	67800 - 68400 sec	88.7	511.3
4	3	First stage	1	WT2	21/08/2013	600	68400 - 69000 sec	118.5	481.5
4	3	First stage	1	WT2	21/08/2013	600	69000 - 69600 sec	262.9	337.1
4	3	First stage	1	WT2	21/08/2013	600	69600 - 70200 sec	153.4	446.6
4	3	First stage	1	WT2	21/08/2013	600	70200 - 70800 sec	79.6	520.4
4	3	First stage	1	WT2	21/08/2013	600	70800 - 71400 sec	300.5	299.5
4	3	First stage	1	WT2	21/08/2013	600	71400 - 72000 sec	572.4	27.6
4	3	First stage	1	WT2	21/08/2013	600	72000 - 72600 sec	540.3	59.8
4	3	First stage	1	WT2	21/08/2013	600	72600 - 73200 sec	245.4	354.6
4	3	First stage	1	WT2	21/08/2013	600	73200 - 73800 sec	199.3	400.7
4	3	First stage	1	WT2	21/08/2013	600	73800 - 74400 sec	132.3	467.8
4	3	First stage	1	WT2	21/08/2013	600	74400 - 75000 sec	60.5	539.5
4	3	First stage	1	WT2	21/08/2013	600	75000 - 75600 sec	362.5	237.5
4	3	First stage	1	WT2	21/08/2013	600	75600 - 76200 sec	256.3	343.7
4	3	First stage	1	WT2	21/08/2013	600	76200 - 76800 sec	167.8	432.2
4	3	First stage	1	WT2	21/08/2013	600	76800 - 77400 sec	75.7	524.3
4	3	First stage	1	WT2	21/08/2013	600	77400 - 78000 sec	0	600
4	3	First stage	1	WT2	21/08/2013	600	78000 - 78600 sec	525.6	74.4
4	3	First stage	1	WT2	21/08/2013	600	78600 - 79200 sec	600	0
4	3	First stage	1	WT2	21/08/2013	600	79200 - 79800 sec	600	0
4	3	First stage	1	WT2	21/08/2013	600	79800 - 80400 sec	600	0
4	3	First stage	1	WT2	21/08/2013	600	80400 - 81000 sec	551.1	48.9
4	3	First stage	1	WT2	21/08/2013	600	81000 - 81600 sec	83.5	516.5
4	3	First stage	1	WT2	21/08/2013	600	81600 - 82200 sec	65.7	534.3
4	3	First stage	1	WT2	21/08/2013	600	82200 - 82800 sec	87.2	512.8
4	3	First stage	1	WT2	21/08/2013	600	82800 - 83400 sec	126.9	473.1
4	3	First stage	1	WT2	21/08/2013	600	83400 - 84000 sec	343.1	256.9
4	3	First stage	1	WT2	21/08/2013	600	84000 - 84600 sec	381.2	218.8
4	3	First stage	1	WT2	21/08/2013	600	84600 - 85200 sec	322.6	277.4
4	3	First stage	1	WT2	21/08/2013	600	85200 - 85800 sec	600	0
4	3	First stage	1	WT2	21/08/2013	600	85800 - 86400 sec	600	0
4	3	First stage	1	WT2	21/08/2013	600	86400 - 87000 sec	600	0
4	3	First stage	1	WT2	21/08/2013	600	87000 - 87600 sec	600	0
4	3	First stage	1	WT2	21/08/2013	600	87600 - 88200 sec	600	0
4	3	First stage	1	WT2	21/08/2013	600	88200 - 88800 sec	600	0
4	3	First stage	1	WT2	21/08/2013	600	88800 - 89400 sec	600	0
4	3	First stage	1	WT2	21/08/2013	600	89400 - 90000 sec	600	0
4	3	First stage	1	WT2	21/08/2013	600	90000 - 90600 sec	600	0
4	3	First stage	1	WT2	21/08/2013	600	90600 - 91200 sec	600	0
4	3	First stage	1	WT2	21/08/2013	600	91200 - 91800 sec	600	0
4	3	First stage	1	WT2	21/08/2013	600	91800 - 92400 sec	600	0
4	3	First stage	1	WT2	21/08/2013	600	92400 - 93000 sec	600	0
4	3	First stage	1	WT2	21/08/2013	600	93000 - 93600 sec	600	0
4	3	First stage	1	WT2	21/08/2013	600	93600 - 94200 sec	600	0
4	3	First stage	1	WT2	21/08/2013	600	94200 - 94800 sec	401.3	198.7
4	3	First stage	1	WT2	21/08/2013	600	94800 - 95400 sec	482.7	117.3
4	3	First stage	1	WT2	21/08/2013	600	95400 - 96000 sec	306.4	293.6
4	3	First stage	1	WT2	21/08/2013	600	96000 - 96600 sec	309.6	290.4
4	3	First stage	1	WT2	21/08/2013	600	96600 - 97200 sec	600	0
4	3	First stage	1	WT2	21/08/2013	600	97200 - 97800 sec	542.8	57.2
4	3	First stage	1	WT2	21/08/2013	600	97800 - 98400 sec	600	0
4	3	First stage	1	WT2	21/08/2013	600	98400 - 99000 sec	600	0
4	3	First stage	1	WT2	21/08/2013	600	99000 - 99600 sec	600	0
4	3	First stage	1	WT2	21/08/2013	600	99600 - 100200 se	600	0
4	3	First stage	1	WT2	21/08/2013	600	100200 - 100800 s	600	0
4	3	First stage	1	WT2	21/08/2013	600	100800 - 101400 s	600	0
4	3	First stage	1	WT2	21/08/2013	600	101400 - 102000 s	600	0
4	3	First stage	1	WT2	21/08/2013	600	102000 - 102600 s	338.4	261.6
4	3	First stage	1	WT2	21/08/2013	600	102600 - 103200 s	332.5	267.5
4	3	First stage	1	WT2	21/08/2013	600	103200 - 103800 s	280.6	319.5
4	3	First stage	1	WT2	21/08/2013	600	103800 - 104400 s	459.1	140.9
4	3	First stage	1	WT2	21/08/2013	600	104400 - 105000 s	600	0
4	3	First stage	1	WT2	21/08/2013	600	105000 - 105600 s	600	0
4	3	First stage	1	WT2	21/08/2013	600	105600 - 106200 s	600	0
4	3	First stage	1	WT2	21/08/2013	600	106200 - 106800 s	600	0
4	3	First stage	1	WT2	21/08/2013	600	106800 - 107400 s	146.3	453.7
4	3	First stage	1	WT2	21/08/2013	600	107400 - 108000 s	221.6	378.4
4	3	First stage	1	WT2	21/08/2013	600	108000 - 108600 s	213.8	386.2
4	3	First stage	1	WT2	21/08/2013	600	108600 - 109200 s	246.7	353.3
4	3	First stage	1	WT2	21/08/2013	600	109200 - 109800 s	600	0
4	3	First stage	1	WT2	21/08/2013	600	109800 - 110400 s	600	0
4	3	First stage	1	WT2	21/08/2013	600	110400 - 111000 s	600	0
4	3	First stage	1	WT2	21/08/2013	600	111000 - 111600 s	600	0
4	3	First stage	1	WT2	21/08/2013	600	111600 - 112200 s	600	0
4	3	First stage	1	WT2	21/08/2013	600	112200 - 112800 s	600	0
4	3	First stage	1	WT2	21/08/2013	600	112800 - 113400 s	332	268
4	3	First stage	1	WT2	21/08/2013	600	113400 - 114000 s	100.7	499.3
4	3	First stage	1	WT2	21/08/2013	600	114000 - 114600 s	23	577
4	3	First stage	1	WT2	21/08/2013	600	114600 - 115200 s	158.6	441.4
4	3	First stage	1	WT2	21/08/2013	600	115200 - 115800 s	121.4	478.6
4	3	First stage	1	WT2	21/08/2013	600	115800 - 116400 s	20	580
4	3	First stage	1	WT2	21/08/2013	600	116400 - 117000 s	119.4	480.6
4	3	First stage	1	WT2	21/08/2013	600	117000 - 117600 s	151.8	448.2
4	3	First stage	1	WT2	21/08/2013	600	117600 - 118200 s	468	132
4	3	First stage	1	WT2	21/08/2013	600	118200 - 118800 s	600	0
4	3	First stage	1	WT2	21/08/2013	600	118800 - 119400 s	600	0
4	3	First stage	1	WT2	21/08/2013	600	119400 - 120000 s	600	0
4	3	First stage	1	WT2	21/08/2013	600	120000 - 120600 s	205.2	394.8
4	3	First stage	1	WT2	21/08/2013	600	120600 - 121200 s	106.8	493.2
4	3	First stage	1	WT2	21/08/2013	600	121200 - 121800 s	174.7	425.3
4	3	First stage	1	WT2	21/08/2013	600	121800 - 122400 s	120.1	479.9
4	3	First stage	1	WT2	21/08/2013	600	122400 - 123000 s	125.6	474.4
4	3	First stage	1	WT2	21/08/2013	600	123000 - 123600 s	485.2	114.8
4	3	First stage	1	WT2	21/08/2013	600	123600 - 124200 s	307.5	292.5
4	3	First stage	1	WT2	21/08/2013	600	124200 - 124800 s	29.8	570.2
4	3	First stage	1	WT2	21/08/2013	600	124800 - 125400 s	187	413
4	3	First stage	1	WT2	21/08/2013	600	125400 - 126000 s	241.9	358.1
4	3	First stage	1	WT2	21/08/2013	600	126000 - 126600 s	558.6	41.4
4	3	First stage	1	WT2	21/08/2013	600	126600 - 127200 s	600	0
4	3	First stage	1	WT2	21/08/2013	600	127200 - 127800 s	600	0
4	3	First stage	1	WT2	21/08/2013	600	127800 - 128400 s	417.9	182.1
4	3	First stage	1	WT2	21/08/2013	600	128400 - 129000 s	118.3	481.7
4	3	First stage	1	WT2	21/08/2013	600	129000 - 129600 s	239.8	360.2
4	3	First stage	1	WT2	21/08/2013	600	129600 - 130200 s	104	496
4	3	First stage	1	WT2	21/08/2013	600	130200 - 130800 s	65.6	534.4
4	3	First stage	1	WT2	21/08/2013	600	130800 - 131400 s	280	320
4	3	First stage	1	WT2	21/08/2013	600	131400 - 132000 s	319.8	280.2
4	3	First stage	1	WT2	21/08/2013	600	132000 - 132600 s	213.8	386.2
4	3	First stage	1	WT2	21/08/2013	600	132600 - 133200 s	193.8	406.2
4	3	First stage	1	WT2	21/08/2013	600	133200 - 133800 s	600	0
4	3	First stage	1	WT2	21/08/2013	600	133800 - 134400 s	284.9	315.2
4	3	First stage	1	WT2	21/08/2013	600	134400 - 135000 s	139.5	460.5
4	3	First stage	1	WT2	21/08/2013	600	135000 - 135600 s	47.3	552.7
4	3	First stage	1	WT2	21/08/2013	600	135600 - 136200 s	33.9	566.2
4	3	First stage	1	WT2	21/08/2013	600	136200 - 136800 s	56.3	543.7
4	3	First stage	1	WT2	21/08/2013	600	136800 - 137400 s	132.6	467.4
4	3	First stage	1	WT2	21/08/2013	600	137400 - 138000 s	149.5	450.5
4	3	First stage	1	WT2	21/08/2013	600	138000 - 138600 s	147	453
4	3	First stage	1	WT2	21/08/2013	600	138600 - 139200 s	168.7	431.3
4	3	First stage	1	WT2	21/08/2013	600	139200 - 139800 s	559.8	40.2
4	3	First stage	1	WT2	21/08/2013	600	139800 - 140400 s	600	0
4	3	First stage	1	WT2	21/08/2013	600	140400 - 141000 s	555.2	44.8
4	3	First stage	1	WT2	21/08/2013	600	141000 - 141600 s	297.9	302.1
4	3	First stage	1	WT2	21/08/2013	600	141600 - 142200 s	57.1	542.9
4	3	First stage	1	WT2	21/08/2013	600	142200 - 142800 s	141.6	458.4
4	3	First stage	1	WT2	21/08/2013	600	142800 - 143400 s	186.9	413.1
4	3	First stage	1	WT2	21/08/2013	600	143400 - 144000 s	197.7	402.3
4	3	First stage	1	WT2	21/08/2013	600	144000 - 144600 s	220.6	379.5
4	3	First stage	1	WT2	21/08/2013	600	144600 - 145200 s	48.1	551.9
4	3	First stage	1	WT2	21/08/2013	600	145200 - 145800 s	73.4	526.6
4	3	First stage	1	WT2	21/08/2013	600	145800 - 146400 s	244.4	355.6
4	3	First stage	1	WT2	21/08/2013	600	146400 - 147000 s	180.1	419.9
4	3	First stage	1	WT2	21/08/2013	600	147000 - 147600 s	185.4	414.6
4	3	First stage	1	WT2	21/08/2013	600	147600 - 148200 s	472.9	127.1
4	3	First stage	1	WT2	21/08/2013	600	148200 - 148800 s	600	0
4	3	First stage	1	WT2	21/08/2013	600	148800 - 149400 s	600	0
4	3	First stage	1	WT2	21/08/2013	600	149400 - 150000 s	600	0
4	3	First stage	1	WT2	21/08/2013	600	150000 - 150600 s	110.3	489.7
4	3	First stage	1	WT2	21/08/2013	600	150600 - 151200 s	88.1	511.9
4	3	First stage	1	WT2	21/08/2013	600	151200 - 151800 s	4.2	595.8
4	3	First stage	1	WT2	21/08/2013	600	151800 - 152400 s	0	600
4	3	First stage	1	WT2	21/08/2013	600	152400 - 153000 s	77.3	522.7
4	3	First stage	1	WT2	21/08/2013	600	153000 - 153600 s	90.4	509.6
4	3	First stage	1	WT2	21/08/2013	600	153600 - 154200 s	127.3	472.8
4	3	First stage	1	WT2	21/08/2013	600	154200 - 154800 s	76.4	523.6
4	3	First stage	1	WT2	21/08/2013	600	154800 - 155400 s	107.6	492.4
4	3	First stage	1	WT2	21/08/2013	600	155400 - 156000 s	124.1	475.9
4	3	First stage	1	WT2	21/08/2013	600	156000 - 156600 s	71.8	528.3
4	3	First stage	1	WT2	21/08/2013	600	156600 - 157200 s	165.1	434.9
4	3	First stage	1	WT2	21/08/2013	600	157200 - 157800 s	434.1	165.9
4	3	First stage	1	WT2	21/08/2013	600	157800 - 158400 s	507.7	92.3
4	3	First stage	1	WT2	21/08/2013	600	158400 - 159000 s	10.1	589.9
4	3	First stage	1	WT2	21/08/2013	600	159000 - 159600 s	64	536
4	3	First stage	1	WT2	21/08/2013	600	159600 - 160200 s	48.3	551.7
4	3	First stage	1	WT2	21/08/2013	600	160200 - 160800 s	36.8	563.2
4	3	First stage	1	WT2	21/08/2013	600	160800 - 161400 s	83.6	516.4
4	3	First stage	1	WT2	21/08/2013	600	161400 - 162000 s	102.1	497.9
4	3	First stage	1	WT2	21/08/2013	600	162000 - 162600 s	600	0
4	3	First stage	1	WT2	21/08/2013	600	162600 - 163200 s	600	0
4	3	First stage	1	WT2	21/08/2013	600	163200 - 163800 s	600	0
4	3	First stage	1	WT2	21/08/2013	600	163800 - 164400 s	531.6	68.4
4	3	First stage	1	WT2	21/08/2013	600	164400 - 165000 s	253.4	346.6
4	3	First stage	1	WT2	21/08/2013	600	165000 - 165600 s	142.7	457.3
4	3	First stage	1	WT2	21/08/2013	600	165600 - 166200 s	96.2	503.8
4	3	First stage	1	WT2	21/08/2013	600	166200 - 166800 s	102.3	497.7
4	3	First stage	1	WT2	21/08/2013	600	166800 - 167400 s	68.7	531.3
4	3	First stage	1	WT2	21/08/2013	600	167400 - 168000 s	115.6	484.4
4	3	First stage	1	WT2	21/08/2013	600	168000 - 168600 s	62.8	537.2
4	3	First stage	1	WT2	21/08/2013	600	168600 - 169200 s	95.5	504.5
4	3	First stage	1	WT2	21/08/2013	600	169200 - 169800 s	111.3	488.7
4	3	First stage	1	WT2	21/08/2013	600	169800 - 170400 s	363.4	236.7
4	3	First stage	1	WT2	21/08/2013	600	170400 - 171000 s	600	0
4	3	First stage	1	WT2	21/08/2013	600	171000 - 171600 s	220.6	379.4
4	3	First stage	1	WT2	21/08/2013	600	171600 - 172200 s	80.6	519.4
4	3	First stage	1	WT2	21/08/2013	600	172200 - 172800 s	145.1	454.9
4	3	First stage	1	WT2	21/08/2013	600	172800 - 173400 s	543.3	56.7
4	3	First stage	1	WT2	21/08/2013	600	173400 - 174000 s	600	0
4	3	First stage	1	WT2	21/08/2013	600	174000 - 174600 s	600	0
4	3	First stage	1	WT2	21/08/2013	600	174600 - 175200 s	555.2	44.8
4	3	First stage	1	WT2	21/08/2013	600	175200 - 175800 s	499.8	100.2
4	3	First stage	1	WT2	21/08/2013	600	175800 - 176400 s	600	0
4	3	First stage	1	WT2	21/08/2013	600	176400 - 177000 s	600	0
4	3	First stage	1	WT2	21/08/2013	600	177000 - 177600 s	600	0
4	3	First stage	1	WT2	21/08/2013	600	177600 - 178200 s	600	0
4	3	First stage	1	WT2	21/08/2013	600	178200 - 178800 s	600	0
4	3	First stage	1	WT2	21/08/2013	600	178800 - 179400 s	600	0
4	3	First stage	1	WT2	21/08/2013	600	179400 - 180000 s	554.8	45.2
4	3	First stage	1	WT2	21/08/2013	600	180000 - 180600 s	442.8	157.2
4	3	First stage	1	WT2	21/08/2013	600	180600 - 181200 s	247.9	352.2
4	3	First stage	1	WT2	21/08/2013	600	181200 - 181800 s	419.3	180.8
4	3	First stage	1	WT2	21/08/2013	600	181800 - 182400 s	561.2	38.8
4	3	First stage	1	WT2	21/08/2013	600	182400 - 183000 s	600	0
4	3	First stage	1	WT2	21/08/2013	600	183000 - 183600 s	600	0
4	3	First stage	1	WT2	21/08/2013	600	183600 - 184200 s	411.7	188.3
4	3	First stage	1	WT2	21/08/2013	600	184200 - 184800 s	233.3	366.7
4	3	First stage	1	WT2	21/08/2013	600	184800 - 185400 s	274.7	325.3
4	3	First stage	1	WT2	21/08/2013	600	185400 - 186000 s	386.7	213.3
4	3	First stage	1	WT2	21/08/2013	600	186000 - 186600 s	422.8	177.2
4	3	First stage	1	WT2	21/08/2013	600	186600 - 187200 s	600	0
4	3	First stage	1	WT2	21/08/2013	600	187200 - 187800 s	600	0
4	3	First stage	1	WT2	21/08/2013	600	187800 - 188400 s	246.9	353.1
4	3	First stage	1	WT2	21/08/2013	600	188400 - 189000 s	210.7	389.3
4	3	First stage	1	WT2	21/08/2013	600	189000 - 189600 s	434.9	165.1
4	3	First stage	1	WT2	21/08/2013	600	189600 - 190200 s	600	0
4	3	First stage	1	WT2	21/08/2013	600	190200 - 190800 s	417.5	182.5
4	3	First stage	1	WT2	21/08/2013	600	190800 - 191400 s	310.6	289.5
4	3	First stage	1	WT2	21/08/2013	600	191400 - 192000 s	333.7	266.3
4	3	First stage	1	WT2	21/08/2013	600	192000 - 192600 s	466.7	133.3
4	3	First stage	1	WT2	21/08/2013	600	192600 - 193200 s	600	0
4	3	First stage	1	WT2	21/08/2013	600	193200 - 193800 s	600	0
4	3	First stage	1	WT2	21/08/2013	600	193800 - 194400 s	312.7	287.3
4	3	First stage	1	WT2	21/08/2013	600	194400 - 195000 s	267.9	332.1
4	3	First stage	1	WT2	21/08/2013	600	195000 - 195600 s	255.9	344.1
4	3	First stage	1	WT2	21/08/2013	600	195600 - 196200 s	442.9	157.1
4	3	First stage	1	WT2	21/08/2013	600	196200 - 196800 s	406.3	193.7
4	3	First stage	1	WT2	21/08/2013	600	196800 - 197400 s	600	0
4	3	First stage	1	WT2	21/08/2013	600	197400 - 198000 s	600	0
4	3	First stage	1	WT2	21/08/2013	600	198000 - 198600 s	600	0
4	3	First stage	1	WT2	21/08/2013	600	198600 - 199200 s	600	0
4	3	First stage	1	WT2	21/08/2013	600	199200 - 199800 s	600	0
4	3	First stage	1	WT2	21/08/2013	600	199800 - 200400 s	600	0
4	3	First stage	1	WT2	21/08/2013	600	200400 - 201000 s	600	0
4	3	First stage	1	WT2	21/08/2013	600	201000 - 201600 s	521.9	78.1
4	3	First stage	1	WT2	21/08/2013	600	201600 - 202200 s	106.2	493.8
4	3	First stage	1	WT2	21/08/2013	600	202200 - 202800 s	141.7	458.3
4	3	First stage	1	WT2	21/08/2013	600	202800 - 203400 s	73.6	526.4
4	3	First stage	1	WT2	21/08/2013	600	203400 - 204000 s	105.3	494.7
4	3	First stage	1	WT2	21/08/2013	600	204000 - 204600 s	242.3	357.7
4	3	First stage	1	WT2	21/08/2013	600	204600 - 205200 s	142.9	457.1
4	3	First stage	1	WT2	21/08/2013	600	205200 - 205800 s	255.5	344.5
4	3	First stage	1	WT2	21/08/2013	600	205800 - 206400 s	145.7	454.3
4	3	First stage	1	WT2	21/08/2013	600	206400 - 207000 s	69.4	530.6
4	3	First stage	1	WT2	21/08/2013	600	207000 - 207600 s	251.1	348.9
4	3	First stage	1	WT2	21/08/2013	600	207600 - 208200 s	600	0
4	3	First stage	1	WT2	21/08/2013	600	208200 - 208800 s	558.9	41.1
4	3	First stage	1	WT2	21/08/2013	600	208800 - 209400 s	600	0
4	3	First stage	1	WT2	21/08/2013	600	209400 - 210000 s	600	0
4	3	First stage	1	WT2	21/08/2013	600	210000 - 210600 s	517.9	82.1
4	3	First stage	1	WT2	21/08/2013	600	210600 - 211200 s	363.1	236.9
4	3	First stage	1	WT2	21/08/2013	600	211200 - 211800 s	165.4	434.6
4	3	First stage	1	WT2	21/08/2013	600	211800 - 212400 s	77.1	522.9
4	3	First stage	1	WT2	21/08/2013	600	212400 - 213000 s	48	552
4	3	First stage	1	WT2	21/08/2013	600	213000 - 213600 s	118.7	481.3
4	3	First stage	1	WT2	21/08/2013	600	213600 - 214200 s	189	411
4	3	First stage	1	WT2	21/08/2013	600	214200 - 214800 s	600	0
4	3	First stage	1	WT2	21/08/2013	600	214800 - 215400 s	600	0
4	3	First stage	1	WT2	21/08/2013	600	215400 - 216000 s	600	0
1	1	First stage	1	WT5	02/09/2013	600	0 - 600 secs.	600	0
1	1	First stage	1	WT5	02/09/2013	600	600 - 1200 secs.	600	0
1	1	First stage	1	WT5	02/09/2013	600	1200 - 1800 secs.	600	0
1	1	First stage	1	WT5	02/09/2013	600	1800 - 2400 secs.	600	0
1	1	First stage	1	WT5	02/09/2013	600	2400 - 3000 secs.	600	0
1	1	First stage	1	WT5	02/09/2013	600	3000 - 3600 secs.	546.4	53.6
1	1	First stage	1	WT5	02/09/2013	600	3600 - 4200 secs.	600	0
1	1	First stage	1	WT5	02/09/2013	600	4200 - 4800 secs.	600	0
1	1	First stage	1	WT5	02/09/2013	600	4800 - 5400 secs.	600	0
1	1	First stage	1	WT5	02/09/2013	600	5400 - 6000 secs.	600	0
1	1	First stage	1	WT5	02/09/2013	600	6000 - 6600 secs.	362.9	237.1
1	1	First stage	1	WT5	02/09/2013	600	6600 - 7200 secs.	224.4	375.6
1	1	First stage	1	WT5	02/09/2013	600	7200 - 7800 secs.	457.9	142.1
1	1	First stage	1	WT5	02/09/2013	600	7800 - 8400 secs.	600	0
1	1	First stage	1	WT5	02/09/2013	600	8400 - 9000 secs.	600	0
1	1	First stage	1	WT5	02/09/2013	600	9000 - 9600 secs.	600	0
1	1	First stage	1	WT5	02/09/2013	600	9600 - 10200 secs	362.5	237.5
1	1	First stage	1	WT5	02/09/2013	600	10200 - 10800 sec	192.2	407.8
1	1	First stage	1	WT5	02/09/2013	600	10800 - 11400 sec	517.8	82.2
1	1	First stage	1	WT5	02/09/2013	600	11400 - 12000 sec	322.3	277.7
1	1	First stage	1	WT5	02/09/2013	600	12000 - 12600 sec	555.8	44.2
1	1	First stage	1	WT5	02/09/2013	600	12600 - 13200 sec	600	0
1	1	First stage	1	WT5	02/09/2013	600	13200 - 13800 sec	600	0
1	1	First stage	1	WT5	02/09/2013	600	13800 - 14400 sec	556	44
1	1	First stage	1	WT5	02/09/2013	600	14400 - 15000 sec	579.3	20.7
1	1	First stage	1	WT5	02/09/2013	600	15000 - 15600 sec	550.5	49.5
1	1	First stage	1	WT5	02/09/2013	600	15600 - 16200 sec	533.3	66.7
1	1	First stage	1	WT5	02/09/2013	600	16200 - 16800 sec	128.3	471.7
1	1	First stage	1	WT5	02/09/2013	600	16800 - 17400 sec	151.8	448.2
1	1	First stage	1	WT5	02/09/2013	600	17400 - 18000 sec	211.4	388.6
1	1	First stage	1	WT5	02/09/2013	600	18000 - 18600 sec	557.4	42.6
1	1	First stage	1	WT5	02/09/2013	600	18600 - 19200 sec	600	0
1	1	First stage	1	WT5	02/09/2013	600	19200 - 19800 sec	573.8	26.2
1	1	First stage	1	WT5	02/09/2013	600	19800 - 20400 sec	116.6	483.4
1	1	First stage	1	WT5	02/09/2013	600	20400 - 21000 sec	233.2	366.8
1	1	First stage	1	WT5	02/09/2013	600	21000 - 21600 sec	600	0
1	1	First stage	1	WT5	02/09/2013	600	21600 - 22200 sec	567.5	32.5
1	1	First stage	1	WT5	02/09/2013	600	22200 - 22800 sec	274.5	325.5
1	1	First stage	1	WT5	02/09/2013	600	22800 - 23400 sec	546.9	53.1
1	1	First stage	1	WT5	02/09/2013	600	23400 - 24000 sec	449.2	150.8
1	1	First stage	1	WT5	02/09/2013	600	24000 - 24600 sec	498.6	101.4
1	1	First stage	1	WT5	02/09/2013	600	24600 - 25200 sec	519.4	80.6
1	1	First stage	1	WT5	02/09/2013	600	25200 - 25800 sec	600	0
1	1	First stage	1	WT5	02/09/2013	600	25800 - 26400 sec	600	0
1	1	First stage	1	WT5	02/09/2013	600	26400 - 27000 sec	600	0
1	1	First stage	1	WT5	02/09/2013	600	27000 - 27600 sec	456.3	143.7
1	1	First stage	1	WT5	02/09/2013	600	27600 - 28200 sec	165.1	434.9
1	1	First stage	1	WT5	02/09/2013	600	28200 - 28800 sec	284.4	315.6
1	1	First stage	1	WT5	02/09/2013	600	28800 - 29400 sec	443	157.1
1	1	First stage	1	WT5	02/09/2013	600	29400 - 30000 sec	600	0
1	1	First stage	1	WT5	02/09/2013	600	30000 - 30600 sec	600	0
1	1	First stage	1	WT5	02/09/2013	600	30600 - 31200 sec	600	0
1	1	First stage	1	WT5	02/09/2013	600	31200 - 31800 sec	600	0
1	1	First stage	1	WT5	02/09/2013	600	31800 - 32400 sec	600	0
1	1	First stage	1	WT5	02/09/2013	600	32400 - 33000 sec	600	0
1	1	First stage	1	WT5	02/09/2013	600	33000 - 33600 sec	190.8	409.2
1	1	First stage	1	WT5	02/09/2013	600	33600 - 34200 sec	148.8	451.2
1	1	First stage	1	WT5	02/09/2013	600	34200 - 34800 sec	215.1	384.9
1	1	First stage	1	WT5	02/09/2013	600	34800 - 35400 sec	600	0
1	1	First stage	1	WT5	02/09/2013	600	35400 - 36000 sec	231	369.1
1	1	First stage	1	WT5	02/09/2013	600	36000 - 36600 sec	318.8	281.2
1	1	First stage	1	WT5	02/09/2013	600	36600 - 37200 sec	162.7	437.3
1	1	First stage	1	WT5	02/09/2013	600	37200 - 37800 sec	226	374.1
1	1	First stage	1	WT5	02/09/2013	600	37800 - 38400 sec	429.8	170.2
1	1	First stage	1	WT5	02/09/2013	600	38400 - 39000 sec	350.9	249.1
1	1	First stage	1	WT5	02/09/2013	600	39000 - 39600 sec	500.4	99.6
1	1	First stage	1	WT5	02/09/2013	600	39600 - 40200 sec	435.5	164.5
1	1	First stage	1	WT5	02/09/2013	600	40200 - 40800 sec	407.7	192.3
1	1	First stage	1	WT5	02/09/2013	600	40800 - 41400 sec	600	0
1	1	First stage	1	WT5	02/09/2013	600	41400 - 42000 sec	600	0
1	1	First stage	1	WT5	02/09/2013	600	42000 - 42600 sec	600	0
1	1	First stage	1	WT5	02/09/2013	600	42600 - 43200 sec	439	161
1	1	First stage	1	WT5	02/09/2013	600	43200 - 43800 sec	199.2	400.8
1	1	First stage	1	WT5	02/09/2013	600	43800 - 44400 sec	110.3	489.7
1	1	First stage	1	WT5	02/09/2013	600	44400 - 45000 sec	6.2	593.8
1	1	First stage	1	WT5	02/09/2013	600	45000 - 45600 sec	6.2	593.8
1	1	First stage	1	WT5	02/09/2013	600	45600 - 46200 sec	5.7	594.3
1	1	First stage	1	WT5	02/09/2013	600	46200 - 46800 sec	185.7	414.4
1	1	First stage	1	WT5	02/09/2013	600	46800 - 47400 sec	40	560
1	1	First stage	1	WT5	02/09/2013	600	47400 - 48000 sec	273	327
1	1	First stage	1	WT5	02/09/2013	600	48000 - 48600 sec	332.4	267.6
1	1	First stage	1	WT5	02/09/2013	600	48600 - 49200 sec	51	549
1	1	First stage	1	WT5	02/09/2013	600	49200 - 49800 sec	80.6	519.4
1	1	First stage	1	WT5	02/09/2013	600	49800 - 50400 sec	16.1	583.9
1	1	First stage	1	WT5	02/09/2013	600	50400 - 51000 sec	98.3	501.7
1	1	First stage	1	WT5	02/09/2013	600	51000 - 51600 sec	209.6	390.4
1	1	First stage	1	WT5	02/09/2013	600	51600 - 52200 sec	121.7	478.3
1	1	First stage	1	WT5	02/09/2013	600	52200 - 52800 sec	58.2	541.8
1	1	First stage	1	WT5	02/09/2013	600	52800 - 53400 sec	56.7	543.3
1	1	First stage	1	WT5	02/09/2013	600	53400 - 54000 sec	42.1	557.9
1	1	First stage	1	WT5	02/09/2013	600	54000 - 54600 sec	342.5	257.5
1	1	First stage	1	WT5	02/09/2013	600	54600 - 55200 sec	300.4	299.6
1	1	First stage	1	WT5	02/09/2013	600	55200 - 55800 sec	32.8	567.2
1	1	First stage	1	WT5	02/09/2013	600	55800 - 56400 sec	199.6	400.4
1	1	First stage	1	WT5	02/09/2013	600	56400 - 57000 sec	560	40
1	1	First stage	1	WT5	02/09/2013	600	57000 - 57600 sec	313.1	286.9
1	1	First stage	1	WT5	02/09/2013	600	57600 - 58200 sec	9.4	590.7
1	1	First stage	1	WT5	02/09/2013	600	58200 - 58800 sec	51.2	548.8
1	1	First stage	1	WT5	02/09/2013	600	58800 - 59400 sec	21.3	578.7
1	1	First stage	1	WT5	02/09/2013	600	59400 - 60000 sec	160.5	439.5
1	1	First stage	1	WT5	02/09/2013	600	60000 - 60600 sec	7	593.1
1	1	First stage	1	WT5	02/09/2013	600	60600 - 61200 sec	98.4	501.6
1	1	First stage	1	WT5	02/09/2013	600	61200 - 61800 sec	430.8	169.2
1	1	First stage	1	WT5	02/09/2013	600	61800 - 62400 sec	547.5	52.5
1	1	First stage	1	WT5	02/09/2013	600	62400 - 63000 sec	506.8	93.2
1	1	First stage	1	WT5	02/09/2013	600	63000 - 63600 sec	116.5	483.5
1	1	First stage	1	WT5	02/09/2013	600	63600 - 64200 sec	33.8	566.2
1	1	First stage	1	WT5	02/09/2013	600	64200 - 64800 sec	4.7	595.3
1	1	First stage	1	WT5	02/09/2013	600	64800 - 65400 sec	72.3	527.7
1	1	First stage	1	WT5	02/09/2013	600	65400 - 66000 sec	49.9	550.1
1	1	First stage	1	WT5	02/09/2013	600	66000 - 66600 sec	43.7	556.3
1	1	First stage	1	WT5	02/09/2013	600	66600 - 67200 sec	69.2	530.8
1	1	First stage	1	WT5	02/09/2013	600	67200 - 67800 sec	260	340
1	1	First stage	1	WT5	02/09/2013	600	67800 - 68400 sec	125.8	474.2
1	1	First stage	1	WT5	02/09/2013	600	68400 - 69000 sec	413	187
1	1	First stage	1	WT5	02/09/2013	600	69000 - 69600 sec	492.6	107.4
1	1	First stage	1	WT5	02/09/2013	600	69600 - 70200 sec	491.7	108.3
1	1	First stage	1	WT5	02/09/2013	600	70200 - 70800 sec	207.6	392.4
1	1	First stage	1	WT5	02/09/2013	600	70800 - 71400 sec	90.3	509.7
1	1	First stage	1	WT5	02/09/2013	600	71400 - 72000 sec	83.5	516.5
1	1	First stage	1	WT5	02/09/2013	600	72000 - 72600 sec	85.6	514.5
1	1	First stage	1	WT5	02/09/2013	600	72600 - 73200 sec	4.6	595.4
1	1	First stage	1	WT5	02/09/2013	600	73200 - 73800 sec	105.8	494.2
1	1	First stage	1	WT5	02/09/2013	600	73800 - 74400 sec	378.5	221.5
1	1	First stage	1	WT5	02/09/2013	600	74400 - 75000 sec	435.5	164.5
1	1	First stage	1	WT5	02/09/2013	600	75000 - 75600 sec	69.6	530.4
1	1	First stage	1	WT5	02/09/2013	600	75600 - 76200 sec	302.1	297.9
1	1	First stage	1	WT5	02/09/2013	600	76200 - 76800 sec	600	0
1	1	First stage	1	WT5	02/09/2013	600	76800 - 77400 sec	549.8	50.2
1	1	First stage	1	WT5	02/09/2013	600	77400 - 78000 sec	190.5	409.5
1	1	First stage	1	WT5	02/09/2013	600	78000 - 78600 sec	131.5	468.5
1	1	First stage	1	WT5	02/09/2013	600	78600 - 79200 sec	42.3	557.7
1	1	First stage	1	WT5	02/09/2013	600	79200 - 79800 sec	73.8	526.2
1	1	First stage	1	WT5	02/09/2013	600	79800 - 80400 sec	38.8	561.2
1	1	First stage	1	WT5	02/09/2013	600	80400 - 81000 sec	120.5	479.5
1	1	First stage	1	WT5	02/09/2013	600	81000 - 81600 sec	82.9	517.1
1	1	First stage	1	WT5	02/09/2013	600	81600 - 82200 sec	405.6	194.4
1	1	First stage	1	WT5	02/09/2013	600	82200 - 82800 sec	600	0
1	1	First stage	1	WT5	02/09/2013	600	82800 - 83400 sec	509.9	90.1
1	1	First stage	1	WT5	02/09/2013	600	83400 - 84000 sec	135.4	464.6
1	1	First stage	1	WT5	02/09/2013	600	84000 - 84600 sec	199.7	400.3
1	1	First stage	1	WT5	02/09/2013	600	84600 - 85200 sec	192.2	407.8
1	1	First stage	1	WT5	02/09/2013	600	85200 - 85800 sec	525.8	74.2
1	1	First stage	1	WT5	02/09/2013	600	85800 - 86400 sec	548.1	51.9
1	1	First stage	1	WT5	02/09/2013	600	86400 - 87000 sec	402.7	197.3
1	1	First stage	1	WT5	02/09/2013	600	87000 - 87600 sec	600	0
1	1	First stage	1	WT5	02/09/2013	600	87600 - 88200 sec	600	0
1	1	First stage	1	WT5	02/09/2013	600	88200 - 88800 sec	600	0
1	1	First stage	1	WT5	02/09/2013	600	88800 - 89400 sec	600	0
1	1	First stage	1	WT5	02/09/2013	600	89400 - 90000 sec	600	0
1	1	First stage	1	WT5	02/09/2013	600	90000 - 90600 sec	600	0
1	1	First stage	1	WT5	02/09/2013	600	90600 - 91200 sec	600	0
1	1	First stage	1	WT5	02/09/2013	600	91200 - 91800 sec	198.2	401.8
1	1	First stage	1	WT5	02/09/2013	600	91800 - 92400 sec	306.5	293.5
1	1	First stage	1	WT5	02/09/2013	600	92400 - 93000 sec	600	0
1	1	First stage	1	WT5	02/09/2013	600	93000 - 93600 sec	600	0
1	1	First stage	1	WT5	02/09/2013	600	93600 - 94200 sec	569.2	30.8
1	1	First stage	1	WT5	02/09/2013	600	94200 - 94800 sec	135.2	464.8
1	1	First stage	1	WT5	02/09/2013	600	94800 - 95400 sec	175.5	424.5
1	1	First stage	1	WT5	02/09/2013	600	95400 - 96000 sec	183.3	416.7
1	1	First stage	1	WT5	02/09/2013	600	96000 - 96600 sec	461	139
1	1	First stage	1	WT5	02/09/2013	600	96600 - 97200 sec	505.2	94.8
1	1	First stage	1	WT5	02/09/2013	600	97200 - 97800 sec	207.1	392.9
1	1	First stage	1	WT5	02/09/2013	600	97800 - 98400 sec	462.4	137.6
1	1	First stage	1	WT5	02/09/2013	600	98400 - 99000 sec	514.2	85.8
1	1	First stage	1	WT5	02/09/2013	600	99000 - 99600 sec	600	0
1	1	First stage	1	WT5	02/09/2013	600	99600 - 100200 se	600	0
1	1	First stage	1	WT5	02/09/2013	600	100200 - 100800 s	600	0
1	1	First stage	1	WT5	02/09/2013	600	100800 - 101400 s	600	0
1	1	First stage	1	WT5	02/09/2013	600	101400 - 102000 s	600	0
1	1	First stage	1	WT5	02/09/2013	600	102000 - 102600 s	600	0
1	1	First stage	1	WT5	02/09/2013	600	102600 - 103200 s	600	0
1	1	First stage	1	WT5	02/09/2013	600	103200 - 103800 s	600	0
1	1	First stage	1	WT5	02/09/2013	600	103800 - 104400 s	600	0
1	1	First stage	1	WT5	02/09/2013	600	104400 - 105000 s	600	0
1	1	First stage	1	WT5	02/09/2013	600	105000 - 105600 s	600	0
1	1	First stage	1	WT5	02/09/2013	600	105600 - 106200 s	600	0
1	1	First stage	1	WT5	02/09/2013	600	106200 - 106800 s	600	0
1	1	First stage	1	WT5	02/09/2013	600	106800 - 107400 s	600	0
1	1	First stage	1	WT5	02/09/2013	600	107400 - 108000 s	194.4	405.6
1	1	First stage	1	WT5	02/09/2013	600	108000 - 108600 s	415.9	184.1
1	1	First stage	1	WT5	02/09/2013	600	108600 - 109200 s	600	0
1	1	First stage	1	WT5	02/09/2013	600	109200 - 109800 s	600	0
1	1	First stage	1	WT5	02/09/2013	600	109800 - 110400 s	378	222
1	1	First stage	1	WT5	02/09/2013	600	110400 - 111000 s	245.2	354.8
1	1	First stage	1	WT5	02/09/2013	600	111000 - 111600 s	279.3	320.7
1	1	First stage	1	WT5	02/09/2013	600	111600 - 112200 s	494.2	105.8
1	1	First stage	1	WT5	02/09/2013	600	112200 - 112800 s	447.1	152.9
1	1	First stage	1	WT5	02/09/2013	600	112800 - 113400 s	600	0
1	1	First stage	1	WT5	02/09/2013	600	113400 - 114000 s	479.3	120.7
1	1	First stage	1	WT5	02/09/2013	600	114000 - 114600 s	94.8	505.2
1	1	First stage	1	WT5	02/09/2013	600	114600 - 115200 s	158.7	441.3
1	1	First stage	1	WT5	02/09/2013	600	115200 - 115800 s	484.1	115.9
1	1	First stage	1	WT5	02/09/2013	600	115800 - 116400 s	221.9	378.1
1	1	First stage	1	WT5	02/09/2013	600	116400 - 117000 s	442.6	157.4
1	1	First stage	1	WT5	02/09/2013	600	117000 - 117600 s	600	0
1	1	First stage	1	WT5	02/09/2013	600	117600 - 118200 s	600	0
1	1	First stage	1	WT5	02/09/2013	600	118200 - 118800 s	600	0
1	1	First stage	1	WT5	02/09/2013	600	118800 - 119400 s	600	0
1	1	First stage	1	WT5	02/09/2013	600	119400 - 120000 s	276.7	323.3
1	1	First stage	1	WT5	02/09/2013	600	120000 - 120600 s	274.1	325.9
1	1	First stage	1	WT5	02/09/2013	600	120600 - 121200 s	363.5	236.5
1	1	First stage	1	WT5	02/09/2013	600	121200 - 121800 s	260.1	339.9
1	1	First stage	1	WT5	02/09/2013	600	121800 - 122400 s	600	0
1	1	First stage	1	WT5	02/09/2013	600	122400 - 123000 s	600	0
1	1	First stage	1	WT5	02/09/2013	600	123000 - 123600 s	600	0
1	1	First stage	1	WT5	02/09/2013	600	123600 - 124200 s	498.6	101.4
1	1	First stage	1	WT5	02/09/2013	600	124200 - 124800 s	600	0
1	1	First stage	1	WT5	02/09/2013	600	124800 - 125400 s	469.3	130.7
1	1	First stage	1	WT5	02/09/2013	600	125400 - 126000 s	118.4	481.6
1	1	First stage	1	WT5	02/09/2013	600	126000 - 126600 s	282	317.9
1	1	First stage	1	WT5	02/09/2013	600	126600 - 127200 s	434	166
1	1	First stage	1	WT5	02/09/2013	600	127200 - 127800 s	482.9	117.1
1	1	First stage	1	WT5	02/09/2013	600	127800 - 128400 s	600	0
1	1	First stage	1	WT5	02/09/2013	600	128400 - 129000 s	448.2	151.8
1	1	First stage	1	WT5	02/09/2013	600	129000 - 129600 s	153.9	446.1
1	1	First stage	1	WT5	02/09/2013	600	129600 - 130200 s	243.1	356.9
1	1	First stage	1	WT5	02/09/2013	600	130200 - 130800 s	177.6	422.4
1	1	First stage	1	WT5	02/09/2013	600	130800 - 131400 s	34.3	565.7
1	1	First stage	1	WT5	02/09/2013	600	131400 - 132000 s	147.7	452.3
1	1	First stage	1	WT5	02/09/2013	600	132000 - 132600 s	47.3	552.7
1	1	First stage	1	WT5	02/09/2013	600	132600 - 133200 s	110.8	489.2
1	1	First stage	1	WT5	02/09/2013	600	133200 - 133800 s	7.3	592.7
1	1	First stage	1	WT5	02/09/2013	600	133800 - 134400 s	351.2	248.8
1	1	First stage	1	WT5	02/09/2013	600	134400 - 135000 s	322.7	277.3
1	1	First stage	1	WT5	02/09/2013	600	135000 - 135600 s	153.4	446.6
1	1	First stage	1	WT5	02/09/2013	600	135600 - 136200 s	214.7	385.3
1	1	First stage	1	WT5	02/09/2013	600	136200 - 136800 s	102.6	497.4
1	1	First stage	1	WT5	02/09/2013	600	136800 - 137400 s	297.1	302.9
1	1	First stage	1	WT5	02/09/2013	600	137400 - 138000 s	465.3	134.7
1	1	First stage	1	WT5	02/09/2013	600	138000 - 138600 s	199.2	400.8
1	1	First stage	1	WT5	02/09/2013	600	138600 - 139200 s	120.1	479.9
1	1	First stage	1	WT5	02/09/2013	600	139200 - 139800 s	111.3	488.7
1	1	First stage	1	WT5	02/09/2013	600	139800 - 140400 s	67.6	532.4
1	1	First stage	1	WT5	02/09/2013	600	140400 - 141000 s	52	548
1	1	First stage	1	WT5	02/09/2013	600	141000 - 141600 s	68.7	531.4
1	1	First stage	1	WT5	02/09/2013	600	141600 - 142200 s	23.4	576.6
1	1	First stage	1	WT5	02/09/2013	600	142200 - 142800 s	3.6	596.4
1	1	First stage	1	WT5	02/09/2013	600	142800 - 143400 s	153.4	446.6
1	1	First stage	1	WT5	02/09/2013	600	143400 - 144000 s	53.6	546.4
1	1	First stage	1	WT5	02/09/2013	600	144000 - 144600 s	264	336
1	1	First stage	1	WT5	02/09/2013	600	144600 - 145200 s	600	0
1	1	First stage	1	WT5	02/09/2013	600	145200 - 145800 s	600	0
1	1	First stage	1	WT5	02/09/2013	600	145800 - 146400 s	600	0
1	1	First stage	1	WT5	02/09/2013	600	146400 - 147000 s	600	0
1	1	First stage	1	WT5	02/09/2013	600	147000 - 147600 s	551.1	48.9
1	1	First stage	1	WT5	02/09/2013	600	147600 - 148200 s	213.5	386.5
1	1	First stage	1	WT5	02/09/2013	600	148200 - 148800 s	0.5	599.5
1	1	First stage	1	WT5	02/09/2013	600	148800 - 149400 s	32.8	567.2
1	1	First stage	1	WT5	02/09/2013	600	149400 - 150000 s	64.2	535.8
1	1	First stage	1	WT5	02/09/2013	600	150000 - 150600 s	66.3	533.7
1	1	First stage	1	WT5	02/09/2013	600	150600 - 151200 s	27.1	572.9
1	1	First stage	1	WT5	02/09/2013	600	151200 - 151800 s	54.6	545.4
1	1	First stage	1	WT5	02/09/2013	600	151800 - 152400 s	57.6	542.4
1	1	First stage	1	WT5	02/09/2013	600	152400 - 153000 s	75.3	524.7
1	1	First stage	1	WT5	02/09/2013	600	153000 - 153600 s	20.8	579.2
1	1	First stage	1	WT5	02/09/2013	600	153600 - 154200 s	125.7	474.3
1	1	First stage	1	WT5	02/09/2013	600	154200 - 154800 s	9.5	590.5
1	1	First stage	1	WT5	02/09/2013	600	154800 - 155400 s	39.6	560.4
1	1	First stage	1	WT5	02/09/2013	600	155400 - 156000 s	122.4	477.6
1	1	First stage	1	WT5	02/09/2013	600	156000 - 156600 s	474.4	125.7
1	1	First stage	1	WT5	02/09/2013	600	156600 - 157200 s	340.2	259.8
1	1	First stage	1	WT5	02/09/2013	600	157200 - 157800 s	96.9	503.1
1	1	First stage	1	WT5	02/09/2013	600	157800 - 158400 s	42.1	557.9
1	1	First stage	1	WT5	02/09/2013	600	158400 - 159000 s	75.7	524.3
1	1	First stage	1	WT5	02/09/2013	600	159000 - 159600 s	36	564
1	1	First stage	1	WT5	02/09/2013	600	159600 - 160200 s	74.7	525.3
1	1	First stage	1	WT5	02/09/2013	600	160200 - 160800 s	75.4	524.6
1	1	First stage	1	WT5	02/09/2013	600	160800 - 161400 s	4.4	595.6
1	1	First stage	1	WT5	02/09/2013	600	161400 - 162000 s	514.7	85.4
1	1	First stage	1	WT5	02/09/2013	600	162000 - 162600 s	600	0
1	1	First stage	1	WT5	02/09/2013	600	162600 - 163200 s	386.4	213.6
1	1	First stage	1	WT5	02/09/2013	600	163200 - 163800 s	18	582
1	1	First stage	1	WT5	02/09/2013	600	163800 - 164400 s	0	600
1	1	First stage	1	WT5	02/09/2013	600	164400 - 165000 s	60.9	539.1
1	1	First stage	1	WT5	02/09/2013	600	165000 - 165600 s	20.8	579.2
1	1	First stage	1	WT5	02/09/2013	600	165600 - 166200 s	80.3	519.8
1	1	First stage	1	WT5	02/09/2013	600	166200 - 166800 s	36.5	563.5
1	1	First stage	1	WT5	02/09/2013	600	166800 - 167400 s	92.2	507.8
1	1	First stage	1	WT5	02/09/2013	600	167400 - 168000 s	183.1	416.9
1	1	First stage	1	WT5	02/09/2013	600	168000 - 168600 s	565.9	34.1
1	1	First stage	1	WT5	02/09/2013	600	168600 - 169200 s	600	0
1	1	First stage	1	WT5	02/09/2013	600	169200 - 169800 s	146.5	453.5
1	1	First stage	1	WT5	02/09/2013	600	169800 - 170400 s	30.2	569.8
1	1	First stage	1	WT5	02/09/2013	600	170400 - 171000 s	147.6	452.4
1	1	First stage	1	WT5	02/09/2013	600	171000 - 171600 s	97.2	502.8
1	1	First stage	1	WT5	02/09/2013	600	171600 - 172200 s	237.9	362.1
1	1	First stage	1	WT5	02/09/2013	600	172200 - 172800 s	314	286.1
1	1	First stage	1	WT5	02/09/2013	600	172800 - 173400 s	600	0
1	1	First stage	1	WT5	02/09/2013	600	173400 - 174000 s	600	0
1	1	First stage	1	WT5	02/09/2013	600	174000 - 174600 s	394	206
1	1	First stage	1	WT5	02/09/2013	600	174600 - 175200 s	310.9	289.1
1	1	First stage	1	WT5	02/09/2013	600	175200 - 175800 s	600	0
1	1	First stage	1	WT5	02/09/2013	600	175800 - 176400 s	600	0
1	1	First stage	1	WT5	02/09/2013	600	176400 - 177000 s	256.7	343.3
1	1	First stage	1	WT5	02/09/2013	600	177000 - 177600 s	397.9	202.2
1	1	First stage	1	WT5	02/09/2013	600	177600 - 178200 s	574.4	25.6
1	1	First stage	1	WT5	02/09/2013	600	178200 - 178800 s	401.2	198.8
1	1	First stage	1	WT5	02/09/2013	600	178800 - 179400 s	600	0
1	1	First stage	1	WT5	02/09/2013	600	179400 - 180000 s	455.7	144.3
1	1	First stage	1	WT5	02/09/2013	600	180000 - 180600 s	600	0
1	1	First stage	1	WT5	02/09/2013	600	180600 - 181200 s	600	0
1	1	First stage	1	WT5	02/09/2013	600	181200 - 181800 s	600	0
1	1	First stage	1	WT5	02/09/2013	600	181800 - 182400 s	600	0
1	1	First stage	1	WT5	02/09/2013	600	182400 - 183000 s	600	0
1	1	First stage	1	WT5	02/09/2013	600	183000 - 183600 s	600	0
1	1	First stage	1	WT5	02/09/2013	600	183600 - 184200 s	496.3	103.7
1	1	First stage	1	WT5	02/09/2013	600	184200 - 184800 s	294.6	305.4
1	1	First stage	1	WT5	02/09/2013	600	184800 - 185400 s	600	0
1	1	First stage	1	WT5	02/09/2013	600	185400 - 186000 s	600	0
1	1	First stage	1	WT5	02/09/2013	600	186000 - 186600 s	600	0
1	1	First stage	1	WT5	02/09/2013	600	186600 - 187200 s	600	0
1	1	First stage	1	WT5	02/09/2013	600	187200 - 187800 s	506.4	93.6
1	1	First stage	1	WT5	02/09/2013	600	187800 - 188400 s	481.6	118.4
1	1	First stage	1	WT5	02/09/2013	600	188400 - 189000 s	77.2	522.8
1	1	First stage	1	WT5	02/09/2013	600	189000 - 189600 s	482.5	117.5
1	1	First stage	1	WT5	02/09/2013	600	189600 - 190200 s	600	0
1	1	First stage	1	WT5	02/09/2013	600	190200 - 190800 s	341.8	258.2
1	1	First stage	1	WT5	02/09/2013	600	190800 - 191400 s	141.5	458.6
1	1	First stage	1	WT5	02/09/2013	600	191400 - 192000 s	320.1	279.9
1	1	First stage	1	WT5	02/09/2013	600	192000 - 192600 s	399.2	200.8
1	1	First stage	1	WT5	02/09/2013	600	192600 - 193200 s	600	0
1	1	First stage	1	WT5	02/09/2013	600	193200 - 193800 s	600	0
1	1	First stage	1	WT5	02/09/2013	600	193800 - 194400 s	600	0
1	1	First stage	1	WT5	02/09/2013	600	194400 - 195000 s	563.6	36.5
1	1	First stage	1	WT5	02/09/2013	600	195000 - 195600 s	448.8	151.2
1	1	First stage	1	WT5	02/09/2013	600	195600 - 196200 s	224.2	375.8
1	1	First stage	1	WT5	02/09/2013	600	196200 - 196800 s	418.2	181.8
1	1	First stage	1	WT5	02/09/2013	600	196800 - 197400 s	312.7	287.3
1	1	First stage	1	WT5	02/09/2013	600	197400 - 198000 s	600	0
1	1	First stage	1	WT5	02/09/2013	600	198000 - 198600 s	283.7	316.3
1	1	First stage	1	WT5	02/09/2013	600	198600 - 199200 s	169.9	430.1
1	1	First stage	1	WT5	02/09/2013	600	199200 - 199800 s	322.3	277.7
1	1	First stage	1	WT5	02/09/2013	600	199800 - 200400 s	570.4	29.6
1	1	First stage	1	WT5	02/09/2013	600	200400 - 201000 s	485.9	114.1
1	1	First stage	1	WT5	02/09/2013	600	201000 - 201600 s	600	0
1	1	First stage	1	WT5	02/09/2013	600	201600 - 202200 s	438.7	161.3
1	1	First stage	1	WT5	02/09/2013	600	202200 - 202800 s	191	409
1	1	First stage	1	WT5	02/09/2013	600	202800 - 203400 s	325.7	274.3
1	1	First stage	1	WT5	02/09/2013	600	203400 - 204000 s	49.3	550.7
1	1	First stage	1	WT5	02/09/2013	600	204000 - 204600 s	564.7	35.3
1	1	First stage	1	WT5	02/09/2013	600	204600 - 205200 s	600	0
1	1	First stage	1	WT5	02/09/2013	600	205200 - 205800 s	600	0
1	1	First stage	1	WT5	02/09/2013	600	205800 - 206400 s	600	0
1	1	First stage	1	WT5	02/09/2013	600	206400 - 207000 s	471.5	128.5
1	1	First stage	1	WT5	02/09/2013	600	207000 - 207600 s	78.1	522
1	1	First stage	1	WT5	02/09/2013	600	207600 - 208200 s	182.4	417.6
1	1	First stage	1	WT5	02/09/2013	600	208200 - 208800 s	182.7	417.3
1	1	First stage	1	WT5	02/09/2013	600	208800 - 209400 s	600	0
1	1	First stage	1	WT5	02/09/2013	600	209400 - 210000 s	600	0
1	1	First stage	1	WT5	02/09/2013	600	210000 - 210600 s	600	0
1	1	First stage	1	WT5	02/09/2013	600	210600 - 211200 s	293.6	306.4
1	1	First stage	1	WT5	02/09/2013	600	211200 - 211800 s	223.1	376.9
1	1	First stage	1	WT5	02/09/2013	600	211800 - 212400 s	215.7	384.3
1	1	First stage	1	WT5	02/09/2013	600	212400 - 213000 s	205.3	394.7
1	1	First stage	1	WT5	02/09/2013	600	213000 - 213600 s	246.7	353.3
1	1	First stage	1	WT5	02/09/2013	600	213600 - 214200 s	418.2	181.8
1	1	First stage	1	WT5	02/09/2013	600	214200 - 214800 s	560.1	39.9
1	1	First stage	1	WT5	02/09/2013	600	214800 - 215400 s	367.9	232.1
1	1	First stage	1	WT5	02/09/2013	600	215400 - 216000 s	480.9	119.1
1	3	First stage	1	WT6	12/08/2013	600	0 - 600 secs.	494.6	105.4
1	3	First stage	1	WT6	12/08/2013	600	600 - 1200 secs.	307.7	292.3
1	3	First stage	1	WT6	12/08/2013	600	1200 - 1800 secs.	13.8	586.2
1	3	First stage	1	WT6	12/08/2013	600	1800 - 2400 secs.	447.9	152.1
1	3	First stage	1	WT6	12/08/2013	600	2400 - 3000 secs.	559.3	40.7
1	3	First stage	1	WT6	12/08/2013	600	3000 - 3600 secs.	596.3	3.7
1	3	First stage	1	WT6	12/08/2013	600	3600 - 4200 secs.	557.9	42.1
1	3	First stage	1	WT6	12/08/2013	600	4200 - 4800 secs.	447.2	152.8
1	3	First stage	1	WT6	12/08/2013	600	4800 - 5400 secs.	10.6	589.4
1	3	First stage	1	WT6	12/08/2013	600	5400 - 6000 secs.	410.3	189.7
1	3	First stage	1	WT6	12/08/2013	600	6000 - 6600 secs.	600	0
1	3	First stage	1	WT6	12/08/2013	600	6600 - 7200 secs.	600	0
1	3	First stage	1	WT6	12/08/2013	600	7200 - 7800 secs.	600	0
1	3	First stage	1	WT6	12/08/2013	600	7800 - 8400 secs.	600	0
1	3	First stage	1	WT6	12/08/2013	600	8400 - 9000 secs.	600	0
1	3	First stage	1	WT6	12/08/2013	600	9000 - 9600 secs.	600	0
1	3	First stage	1	WT6	12/08/2013	600	9600 - 10200 secs	600	0
1	3	First stage	1	WT6	12/08/2013	600	10200 - 10800 sec	600	0
1	3	First stage	1	WT6	12/08/2013	600	10800 - 11400 sec	600	0
1	3	First stage	1	WT6	12/08/2013	600	11400 - 12000 sec	600	0
1	3	First stage	1	WT6	12/08/2013	600	12000 - 12600 sec	520.3	79.7
1	3	First stage	1	WT6	12/08/2013	600	12600 - 13200 sec	291.3	308.7
1	3	First stage	1	WT6	12/08/2013	600	13200 - 13800 sec	474.3	125.7
1	3	First stage	1	WT6	12/08/2013	600	13800 - 14400 sec	600	0
1	3	First stage	1	WT6	12/08/2013	600	14400 - 15000 sec	600	0
1	3	First stage	1	WT6	12/08/2013	600	15000 - 15600 sec	314.1	285.9
1	3	First stage	1	WT6	12/08/2013	600	15600 - 16200 sec	327.1	272.9
1	3	First stage	1	WT6	12/08/2013	600	16200 - 16800 sec	67	533
1	3	First stage	1	WT6	12/08/2013	600	16800 - 17400 sec	450.8	149.2
1	3	First stage	1	WT6	12/08/2013	600	17400 - 18000 sec	600	0
1	3	First stage	1	WT6	12/08/2013	600	18000 - 18600 sec	518.3	81.7
1	3	First stage	1	WT6	12/08/2013	600	18600 - 19200 sec	233.6	366.4
1	3	First stage	1	WT6	12/08/2013	600	19200 - 19800 sec	128.4	471.6
1	3	First stage	1	WT6	12/08/2013	600	19800 - 20400 sec	15.6	584.4
1	3	First stage	1	WT6	12/08/2013	600	20400 - 21000 sec	0	600
1	3	First stage	1	WT6	12/08/2013	600	21000 - 21600 sec	0.5	599.5
1	3	First stage	1	WT6	12/08/2013	600	21600 - 22200 sec	63.3	536.7
1	3	First stage	1	WT6	12/08/2013	600	22200 - 22800 sec	8.9	591.1
1	3	First stage	1	WT6	12/08/2013	600	22800 - 23400 sec	55.4	544.6
1	3	First stage	1	WT6	12/08/2013	600	23400 - 24000 sec	226	374
1	3	First stage	1	WT6	12/08/2013	600	24000 - 24600 sec	600	0
1	3	First stage	1	WT6	12/08/2013	600	24600 - 25200 sec	600	0
1	3	First stage	1	WT6	12/08/2013	600	25200 - 25800 sec	600	0
[truncated: 1,397 more rows]

## Sheet: Fig2A raw data WT 405nm pulse 
Animal	Stage	Trial	Apparatus	Date	Duration	Segment of test	Time mobile	Time immobile
[truncated: 144 more rows]

[truncated: 4 more sheets: Fig2C raw data WT 530nm pulse, Fig2 A,B,C  , Fig2 D  , Fig2 E  ]
