# Supplementary material for: Melanopsin Regulates Both Sleep-Promoting and Arousal-Promoting Responses to Light
Source: PLoS Biol. 2016 Jun 8;14(6):e1002482. doi: 10.1371/journal.pbio.1002482 (PMC4898879; doi:10.1371/journal.pbio.1002482)
Supplement: S11 Data — (XLSX) [file pbio.1002482.s011.xlsx]

## Sheet: S5 raw data 
Test	Animal	Stage	Trial	Apparatus	Date	Duration	Segment of test	Time mobile	Time immobile	Treatment
1	1	First stage	1	mouse1 70	2014-05-05	600	0 - 600 secs.	600	0	drug
1	1	First stage	1	mouse1 70	2014-05-05	600	600 - 1200 secs.	600	0	drug
1	1	First stage	1	mouse1 70	2014-05-05	600	1200 - 1800 secs.	600	0	drug
1	1	First stage	1	mouse1 70	2014-05-05	600	1800 - 2400 secs.	306.1	293.9	drug
1	1	First stage	1	mouse1 70	2014-05-05	600	2400 - 3000 secs.	91.1	508.9	drug
1	1	First stage	1	mouse1 70	2014-05-05	600	3000 - 3600 secs.	317.5	282.5	drug
1	1	First stage	1	mouse1 70	2014-05-05	600	3600 - 4200 secs.	138.3	461.7	drug
1	1	First stage	1	mouse1 70	2014-05-05	600	4200 - 4800 secs.	259.3	340.7	drug
1	1	First stage	1	mouse1 70	2014-05-05	600	4800 - 5400 secs.	196.8	403.2	drug
1	1	First stage	1	mouse1 70	2014-05-05	600	5400 - 6000 secs.	134.4	465.6	drug
1	1	First stage	1	mouse1 70	2014-05-05	600	6000 - 6600 secs.	199.6	400.4	drug
1	1	First stage	1	mouse1 70	2014-05-05	600	6600 - 7200 secs.	141.2	458.8	drug
1	1	First stage	1	mouse1 70	2014-05-05	600	7200 - 7800 secs.	256.2	343.8	drug
1	1	First stage	1	mouse1 70	2014-05-05	600	7800 - 8400 secs.	313.8	286.2	drug
1	1	First stage	1	mouse1 70	2014-05-05	600	8400 - 9000 secs.	347.8	252.2	drug
1	1	First stage	1	mouse1 70	2014-05-05	600	9000 - 9600 secs.	520.1	79.9	drug
1	1	First stage	1	mouse1 70	2014-05-05	600	9600 - 10200 secs	591.9	8.1	drug
1	1	First stage	1	mouse1 70	2014-05-05	600	10200 - 10800 sec	600	0	drug
2	2	First stage	1	mouse2 69	2014-05-05	600	0 - 600 secs.	554.4	45.6	drug
2	2	First stage	1	mouse2 69	2014-05-05	600	600 - 1200 secs.	319.9	280.1	drug
2	2	First stage	1	mouse2 69	2014-05-05	600	1200 - 1800 secs.	459.9	140.1	drug
2	2	First stage	1	mouse2 69	2014-05-05	600	1800 - 2400 secs.	484	116	drug
2	2	First stage	1	mouse2 69	2014-05-05	600	2400 - 3000 secs.	421.4	178.6	drug
2	2	First stage	1	mouse2 69	2014-05-05	600	3000 - 3600 secs.	536.1	63.9	drug
2	2	First stage	1	mouse2 69	2014-05-05	600	3600 - 4200 secs.	186	414	drug
2	2	First stage	1	mouse2 69	2014-05-05	600	4200 - 4800 secs.	0	600	drug
2	2	First stage	1	mouse2 69	2014-05-05	600	4800 - 5400 secs.	321.1	278.9	drug
2	2	First stage	1	mouse2 69	2014-05-05	600	5400 - 6000 secs.	1.8	598.2	drug
2	2	First stage	1	mouse2 69	2014-05-05	600	6000 - 6600 secs.	304.7	295.3	drug
2	2	First stage	1	mouse2 69	2014-05-05	600	6600 - 7200 secs.	285.9	314.1	drug
2	2	First stage	1	mouse2 69	2014-05-05	600	7200 - 7800 secs.	304.7	295.3	drug
2	2	First stage	1	mouse2 69	2014-05-05	600	7800 - 8400 secs.	400	200	drug
2	2	First stage	1	mouse2 69	2014-05-05	600	8400 - 9000 secs.	545.4	54.6	drug
2	2	First stage	1	mouse2 69	2014-05-05	600	9000 - 9600 secs.	527.5	72.5	drug
2	2	First stage	1	mouse2 69	2014-05-05	600	9600 - 10200 secs	431.5	168.5	drug
2	2	First stage	1	mouse2 69	2014-05-05	600	10200 - 10800 sec	600	0	drug
3	4	First stage	1	mouse4 67	2014-05-05	600	0 - 600 secs.	600	0	vehicle
3	4	First stage	1	mouse4 67	2014-05-05	600	600 - 1200 secs.	600	0	vehicle
3	4	First stage	1	mouse4 67	2014-05-05	600	1200 - 1800 secs.	600	0	vehicle
3	4	First stage	1	mouse4 67	2014-05-05	600	1800 - 2400 secs.	600	0	vehicle
3	4	First stage	1	mouse4 67	2014-05-05	600	2400 - 3000 secs.	600	0	vehicle
3	4	First stage	1	mouse4 67	2014-05-05	600	3000 - 3600 secs.	600	0	vehicle
3	4	First stage	1	mouse4 67	2014-05-05	600	3600 - 4200 secs.	600	0	vehicle
3	4	First stage	1	mouse4 67	2014-05-05	600	4200 - 4800 secs.	600	0	vehicle
3	4	First stage	1	mouse4 67	2014-05-05	600	4800 - 5400 secs.	2.1	597.9	vehicle
3	4	First stage	1	mouse4 67	2014-05-05	600	5400 - 6000 secs.	68	532	vehicle
3	4	First stage	1	mouse4 67	2014-05-05	600	6000 - 6600 secs.	8.3	591.7	vehicle
3	4	First stage	1	mouse4 67	2014-05-05	600	6600 - 7200 secs.	181.7	418.3	vehicle
3	4	First stage	1	mouse4 67	2014-05-05	600	7200 - 7800 secs.	449.1	150.9	vehicle
3	4	First stage	1	mouse4 67	2014-05-05	600	7800 - 8400 secs.	439.4	160.6	vehicle
3	4	First stage	1	mouse4 67	2014-05-05	600	8400 - 9000 secs.	450.8	149.2	vehicle
3	4	First stage	1	mouse4 67	2014-05-05	600	9000 - 9600 secs.	505.3	94.7	vehicle
3	4	First stage	1	mouse4 67	2014-05-05	600	9600 - 10200 secs	600	0	vehicle
3	4	First stage	1	mouse4 67	2014-05-05	600	10200 - 10800 sec	553.7	46.3	vehicle
4	3	First stage	1	mouse3 68	2014-05-05	600	0 - 600 secs.	600	0	drug
4	3	First stage	1	mouse3 68	2014-05-05	600	600 - 1200 secs.	600	0	drug
4	3	First stage	1	mouse3 68	2014-05-05	600	1200 - 1800 secs.	600	0	drug
4	3	First stage	1	mouse3 68	2014-05-05	600	1800 - 2400 secs.	600	0	drug
4	3	First stage	1	mouse3 68	2014-05-05	600	2400 - 3000 secs.	381.8	218.2	drug
4	3	First stage	1	mouse3 68	2014-05-05	600	3000 - 3600 secs.	330	270	drug
4	3	First stage	1	mouse3 68	2014-05-05	600	3600 - 4200 secs.	3	597	drug
4	3	First stage	1	mouse3 68	2014-05-05	600	4200 - 4800 secs.	6	594	drug
4	3	First stage	1	mouse3 68	2014-05-05	600	4800 - 5400 secs.	93.9	506.1	drug
4	3	First stage	1	mouse3 68	2014-05-05	600	5400 - 6000 secs.	80.7	519.3	drug
4	3	First stage	1	mouse3 68	2014-05-05	600	6000 - 6600 secs.	32.4	567.6	drug
4	3	First stage	1	mouse3 68	2014-05-05	600	6600 - 7200 secs.	188.8	411.2	drug
4	3	First stage	1	mouse3 68	2014-05-05	600	7200 - 7800 secs.	387.9	212.1	drug
4	3	First stage	1	mouse3 68	2014-05-05	600	7800 - 8400 secs.	548	52	drug
4	3	First stage	1	mouse3 68	2014-05-05	600	8400 - 9000 secs.	519.1	80.9	drug
4	3	First stage	1	mouse3 68	2014-05-05	600	9000 - 9600 secs.	361.1	238.9	drug
4	3	First stage	1	mouse3 68	2014-05-05	600	9600 - 10200 secs	433.8	166.2	drug
4	3	First stage	1	mouse3 68	2014-05-05	600	10200 - 10800 sec	600	0	drug
1	1	First stage	1	WT4	2015-05-05	600	0 - 600 secs.	600	0	vehicle
1	1	First stage	1	WT4	2015-05-05	600	600 - 1200 secs.	600	0	vehicle
1	1	First stage	1	WT4	2015-05-05	600	1200 - 1800 secs.	600	0	vehicle
1	1	First stage	1	WT4	2015-05-05	600	1800 - 2400 secs.	578	22	vehicle
1	1	First stage	1	WT4	2015-05-05	600	2400 - 3000 secs.	600	0	vehicle
1	1	First stage	1	WT4	2015-05-05	600	3000 - 3600 secs.	600	0	vehicle
1	1	First stage	1	WT4	2015-05-05	600	3600 - 4200 secs.	390.6	209.4	vehicle
1	1	First stage	1	WT4	2015-05-05	600	4200 - 4800 secs.	353.1	246.9	vehicle
1	1	First stage	1	WT4	2015-05-05	600	4800 - 5400 secs.	146.7	453.3	vehicle
1	1	First stage	1	WT4	2015-05-05	600	5400 - 6000 secs.	12.2	587.8	vehicle
1	1	First stage	1	WT4	2015-05-05	600	6000 - 6600 secs.	2	598	vehicle
1	1	First stage	1	WT4	2015-05-05	600	6600 - 7200 secs.	434.4	165.6	vehicle
1	1	First stage	1	WT4	2015-05-05	600	7200 - 7800 secs.	508	92	vehicle
1	1	First stage	1	WT4	2015-05-05	600	7800 - 8400 secs.	462.7	137.3	vehicle
1	1	First stage	1	WT4	2015-05-05	600	8400 - 9000 secs.	600	0	vehicle
1	1	First stage	1	WT4	2015-05-05	600	9000 - 9600 secs.	474.8	125.2	vehicle
1	1	First stage	1	WT4	2015-05-05	600	9600 - 10200 secs	600	0	vehicle
1	1	First stage	1	WT4	2015-05-05	600	10200 - 10800 sec	426.6	173.4	vehicle
2	2	First stage	1	WT3	2015-05-05	600	0 - 600 secs.	600	0	drug
2	2	First stage	1	WT3	2015-05-05	600	600 - 1200 secs.	451.3	148.7	drug
2	2	First stage	1	WT3	2015-05-05	600	1200 - 1800 secs.	600	0	drug
2	2	First stage	1	WT3	2015-05-05	600	1800 - 2400 secs.	66.8	533.2	drug
2	2	First stage	1	WT3	2015-05-05	600	2400 - 3000 secs.	143.5	456.5	drug
2	2	First stage	1	WT3	2015-05-05	600	3000 - 3600 secs.	387.1	212.9	drug
2	2	First stage	1	WT3	2015-05-05	600	3600 - 4200 secs.	131.9	468.1	drug
2	2	First stage	1	WT3	2015-05-05	600	4200 - 4800 secs.	71.5	528.5	drug
2	2	First stage	1	WT3	2015-05-05	600	4800 - 5400 secs.	132.3	467.7	drug
2	2	First stage	1	WT3	2015-05-05	600	5400 - 6000 secs.	88	512	drug
2	2	First stage	1	WT3	2015-05-05	600	6000 - 6600 secs.	145	455	drug
2	2	First stage	1	WT3	2015-05-05	600	6600 - 7200 secs.	98	502	drug
2	2	First stage	1	WT3	2015-05-05	600	7200 - 7800 secs.	200	400	drug
2	2	First stage	1	WT3	2015-05-05	600	7800 - 8400 secs.	349.8	250.2	drug
2	2	First stage	1	WT3	2015-05-05	600	8400 - 9000 secs.	274.1	325.9	drug
2	2	First stage	1	WT3	2015-05-05	600	9000 - 9600 secs.	292.6	307.4	drug
2	2	First stage	1	WT3	2015-05-05	600	9600 - 10200 secs	289.6	310.4	drug
2	2	First stage	1	WT3	2015-05-05	600	10200 - 10800 sec	266.5	333.5	drug
3	4	First stage	1	WT1	2015-05-05	600	0 - 600 secs.	170.2	429.8	drug
3	4	First stage	1	WT1	2015-05-05	600	600 - 1200 secs.	513.2	86.8	drug
3	4	First stage	1	WT1	2015-05-05	600	1200 - 1800 secs.	202.9	397.1	drug
3	4	First stage	1	WT1	2015-05-05	600	1800 - 2400 secs.	257.2	342.8	drug
3	4	First stage	1	WT1	2015-05-05	600	2400 - 3000 secs.	600	0	drug
3	4	First stage	1	WT1	2015-05-05	600	3000 - 3600 secs.	384.4	215.6	drug
3	4	First stage	1	WT1	2015-05-05	600	3600 - 4200 secs.	39.4	560.6	drug
3	4	First stage	1	WT1	2015-05-05	600	4200 - 4800 secs.	274.1	325.9	drug
3	4	First stage	1	WT1	2015-05-05	600	4800 - 5400 secs.	292.6	307.4	drug
3	4	First stage	1	WT1	2015-05-05	600	5400 - 6000 secs.	207.5	392.5	drug
3	4	First stage	1	WT1	2015-05-05	600	6000 - 6600 secs.	235.3	364.7	drug
3	4	First stage	1	WT1	2015-05-05	600	6600 - 7200 secs.	218.3	381.7	drug
3	4	First stage	1	WT1	2015-05-05	600	7200 - 7800 secs.	454.9	145.1	drug
3	4	First stage	1	WT1	2015-05-05	600	7800 - 8400 secs.	488	112	drug
3	4	First stage	1	WT1	2015-05-05	600	8400 - 9000 secs.	530.7	69.3	drug
3	4	First stage	1	WT1	2015-05-05	600	9000 - 9600 secs.	457.9	142.1	drug
3	4	First stage	1	WT1	2015-05-05	600	9600 - 10200 secs	424.5	175.5	drug
3	4	First stage	1	WT1	2015-05-05	600	10200 - 10800 sec	423.9	176.1	drug
4	3	First stage	1	WT2	2015-05-05	600	0 - 600 secs.	600	0	vehicle
4	3	First stage	1	WT2	2015-05-05	600	600 - 1200 secs.	550.3	49.7	vehicle
4	3	First stage	1	WT2	2015-05-05	600	1200 - 1800 secs.	600	0	vehicle
4	3	First stage	1	WT2	2015-05-05	600	1800 - 2400 secs.	433	167	vehicle
4	3	First stage	1	WT2	2015-05-05	600	2400 - 3000 secs.	600	0	vehicle
4	3	First stage	1	WT2	2015-05-05	600	3000 - 3600 secs.	600	0	vehicle
4	3	First stage	1	WT2	2015-05-05	600	3600 - 4200 secs.	574.4	25.6	vehicle
4	3	First stage	1	WT2	2015-05-05	600	4200 - 4800 secs.	344	256	vehicle
4	3	First stage	1	WT2	2015-05-05	600	4800 - 5400 secs.	7.3	592.7	vehicle
4	3	First stage	1	WT2	2015-05-05	600	5400 - 6000 secs.	18.8	581.2	vehicle
4	3	First stage	1	WT2	2015-05-05	600	6000 - 6600 secs.	16.4	583.6	vehicle
4	3	First stage	1	WT2	2015-05-05	600	6600 - 7200 secs.	72.5	527.5	vehicle
4	3	First stage	1	WT2	2015-05-05	600	7200 - 7800 secs.	523.2	76.8	vehicle
4	3	First stage	1	WT2	2015-05-05	600	7800 - 8400 secs.	408.4	191.6	vehicle
4	3	First stage	1	WT2	2015-05-05	600	8400 - 9000 secs.	448.5	151.5	vehicle
4	3	First stage	1	WT2	2015-05-05	600	9000 - 9600 secs.	443.7	156.3	vehicle
4	3	First stage	1	WT2	2015-05-05	600	9600 - 10200 secs	600	0	vehicle
4	3	First stage	1	WT2	2015-05-05	600	10200 - 10800 sec	600	0	vehicle
1	1	First stage	1	mouse1 70	26/05/2014	600	0 - 600 secs.	600	0	drug
1	1	First stage	1	mouse1 70	26/05/2015	600	600 - 1200 secs.	135.8	464.2	drug
1	1	First stage	1	mouse1 70	26/05/2015	600	1200 - 1800 secs.	286.2	313.8	drug
1	1	First stage	1	mouse1 70	26/05/2015	600	1800 - 2400 secs.	600	0	drug
1	1	First stage	1	mouse1 70	26/05/2015	600	2400 - 3000 secs.	265.1	334.9	drug
1	1	First stage	1	mouse1 70	26/05/2015	600	3000 - 3600 secs.	44	556	drug
1	1	First stage	1	mouse1 70	26/05/2015	600	3600 - 4200 secs.	218.9	381.1	drug
1	1	First stage	1	mouse1 70	26/05/2015	600	4200 - 4800 secs.	247	353	drug
1	1	First stage	1	mouse1 70	26/05/2015	600	4800 - 5400 secs.	4.8	595.2	drug
1	1	First stage	1	mouse1 70	26/05/2015	600	5400 - 6000 secs.	1	599	drug
1	1	First stage	1	mouse1 70	26/05/2015	600	6000 - 6600 secs.	16.5	583.5	drug
1	1	First stage	1	mouse1 70	26/05/2015	600	6600 - 7200 secs.	74.3	525.7	drug
1	1	First stage	1	mouse1 70	26/05/2015	600	7200 - 7800 secs.	577.1	22.9	drug
1	1	First stage	1	mouse1 70	26/05/2015	600	7800 - 8400 secs.	423.1	176.9	drug
1	1	First stage	1	mouse1 70	26/05/2015	600	8400 - 9000 secs.	304.4	295.6	drug
1	1	First stage	1	mouse1 70	26/05/2015	600	9000 - 9600 secs.	583.5	16.5	drug
1	1	First stage	1	mouse1 70	26/05/2015	600	9600 - 10200 secs	292.4	307.6	drug
1	1	First stage	1	mouse1 70	26/05/2015	600	10200 - 10800 sec	508.4	91.6	drug
2	2	First stage	1	mouse2 69	26/05/2015	600	0 - 600 secs.	600	0	drug
2	2	First stage	1	mouse2 69	26/05/2015	600	600 - 1200 secs.	358.8	241.2	drug
2	2	First stage	1	mouse2 69	26/05/2015	600	1200 - 1800 secs.	42.6	557.4	drug
2	2	First stage	1	mouse2 69	26/05/2015	600	1800 - 2400 secs.	426.2	173.8	drug
2	2	First stage	1	mouse2 69	26/05/2015	600	2400 - 3000 secs.	287.3	312.7	drug
2	2	First stage	1	mouse2 69	26/05/2015	600	3000 - 3600 secs.	174.4	425.6	drug
2	2	First stage	1	mouse2 69	26/05/2015	600	3600 - 4200 secs.	95.6	504.4	drug
2	2	First stage	1	mouse2 69	26/05/2015	600	4200 - 4800 secs.	180.6	419.4	drug
2	2	First stage	1	mouse2 69	26/05/2015	600	4800 - 5400 secs.	65.6	534.4	drug
2	2	First stage	1	mouse2 69	26/05/2015	600	5400 - 6000 secs.	3.1	596.9	drug
2	2	First stage	1	mouse2 69	26/05/2015	600	6000 - 6600 secs.	27	573	drug
2	2	First stage	1	mouse2 69	26/05/2015	600	6600 - 7200 secs.	136.1	463.9	drug
2	2	First stage	1	mouse2 69	26/05/2015	600	7200 - 7800 secs.	478.5	121.5	drug
2	2	First stage	1	mouse2 69	26/05/2015	600	7800 - 8400 secs.	270.7	329.3	drug
2	2	First stage	1	mouse2 69	26/05/2015	600	8400 - 9000 secs.	144	456	drug
2	2	First stage	1	mouse2 69	26/05/2015	600	9000 - 9600 secs.	458.3	141.7	drug
2	2	First stage	1	mouse2 69	26/05/2015	600	9600 - 10200 secs	412.1	187.9	drug
2	2	First stage	1	mouse2 69	26/05/2015	600	10200 - 10800 sec	543.8	56.2	drug
3	4	First stage	1	mouse4 67	26/05/2015	600	0 - 600 secs.	600	0	vehicle
3	4	First stage	1	mouse4 67	26/05/2015	600	600 - 1200 secs.	267.3	332.7	vehicle
3	4	First stage	1	mouse4 67	26/05/2015	600	1200 - 1800 secs.	335	265	vehicle
3	4	First stage	1	mouse4 67	26/05/2015	600	1800 - 2400 secs.	437.2	162.8	vehicle
3	4	First stage	1	mouse4 67	26/05/2015	600	2400 - 3000 secs.	600	0	vehicle
3	4	First stage	1	mouse4 67	26/05/2015	600	3000 - 3600 secs.	442.1	157.9	vehicle
3	4	First stage	1	mouse4 67	26/05/2015	600	3600 - 4200 secs.	342.6	257.4	vehicle
3	4	First stage	1	mouse4 67	26/05/2015	600	4200 - 4800 secs.	13.5	586.5	vehicle
3	4	First stage	1	mouse4 67	26/05/2015	600	4800 - 5400 secs.	18.7	581.3	vehicle
3	4	First stage	1	mouse4 67	26/05/2015	600	5400 - 6000 secs.	435.7	164.3	vehicle
3	4	First stage	1	mouse4 67	26/05/2015	600	6000 - 6600 secs.	170.6	429.4	vehicle
3	4	First stage	1	mouse4 67	26/05/2015	600	6600 - 7200 secs.	149.5	450.5	vehicle
3	4	First stage	1	mouse4 67	26/05/2015	600	7200 - 7800 secs.	367.3	232.7	vehicle
3	4	First stage	1	mouse4 67	26/05/2015	600	7800 - 8400 secs.	465.6	134.4	vehicle
3	4	First stage	1	mouse4 67	26/05/2015	600	8400 - 9000 secs.	430.4	169.6	vehicle
3	4	First stage	1	mouse4 67	26/05/2015	600	9000 - 9600 secs.	600	0	vehicle
3	4	First stage	1	mouse4 67	26/05/2015	600	9600 - 10200 secs	600	0	vehicle
3	4	First stage	1	mouse4 67	26/05/2015	600	10200 - 10800 sec	396	204	vehicle
4	3	First stage	1	mouse3 68	26/05/2015	600	0 - 600 secs.	535.5	64.5	vehicle
4	3	First stage	1	mouse3 68	26/05/2015	600	600 - 1200 secs.	600	0	vehicle
4	3	First stage	1	mouse3 68	26/05/2015	600	1200 - 1800 secs.	355.1	244.9	vehicle
4	3	First stage	1	mouse3 68	26/05/2015	600	1800 - 2400 secs.	600	0	vehicle
4	3	First stage	1	mouse3 68	26/05/2015	600	2400 - 3000 secs.	498.5	101.5	vehicle
4	3	First stage	1	mouse3 68	26/05/2015	600	3000 - 3600 secs.	365.5	234.5	vehicle
4	3	First stage	1	mouse3 68	26/05/2015	600	3600 - 4200 secs.	344.8	255.2	vehicle
4	3	First stage	1	mouse3 68	26/05/2015	600	4200 - 4800 secs.	276.2	323.8	vehicle
4	3	First stage	1	mouse3 68	26/05/2015	600	4800 - 5400 secs.	58.8	541.2	vehicle
4	3	First stage	1	mouse3 68	26/05/2015	600	5400 - 6000 secs.	75.5	524.5	vehicle
4	3	First stage	1	mouse3 68	26/05/2015	600	6000 - 6600 secs.	164.8	435.2	vehicle
4	3	First stage	1	mouse3 68	26/05/2015	600	6600 - 7200 secs.	213.6	386.4	vehicle
4	3	First stage	1	mouse3 68	26/05/2015	600	7200 - 7800 secs.	544.2	55.8	vehicle
4	3	First stage	1	mouse3 68	26/05/2015	600	7800 - 8400 secs.	540.6	59.4	vehicle
4	3	First stage	1	mouse3 68	26/05/2015	600	8400 - 9000 secs.	600	0	vehicle
4	3	First stage	1	mouse3 68	26/05/2015	600	9000 - 9600 secs.	600	0	vehicle
4	3	First stage	1	mouse3 68	26/05/2015	600	9600 - 10200 secs	553.7	46.3	vehicle
4	3	First stage	1	mouse3 68	26/05/2015	600	10200 - 10800 sec	600	0	vehicle

## Sheet: S5 
	sleep %
time ZT	RU-489	error	vehicle	error
13.1	11.1	7.91	1.54	1.54
13.2	34.41	9.65	18.39	8.36
13.3	43.02	12.6	15.18	7.65
13.4	35.56	11.35	8.38	4.96
13.5	37.22	10.9	10.79	5.32
14	46.36	9.48	17.39	6.66
14.1	82.01	3.84	28.4	6.97
14.2	71.94	6.2	45.2	10.87
14.3	77.41	6.2	89.79	4.11
14.4	85.39	4.28	69.9	14.64
14.5	73.77	5.96	85.21	5.69
15	69.11	4.8	59.11	7.99
15.1	37.21	6.55	24.27	8.72
15.2	35.46	4.88	24.62	5.28
15.3	37.26	7.66	13.12	4.95
15.4	25.75	6.47	22.3	7.46
15.5	30.81	4.94	5.06	3.93
16	21.57	7.32	10.09	5.64
